# Supplementary material for: Intramolecular Interception of the Remote Position of Vinylcarbene Silver Complex Intermediates by C(sp3)−H Bond Insertion
Source: PubMed Central journal article supplement — Angew Chem Int Ed Engl. 2022 Dec 22;62(5):e202215163. doi: 10.1002/anie.202215163 (PMC10108323; doi:10.1002/anie.202215163), 2022-12-22

Supporting Information

**Intramolecular Interception of the Remote Position of Vinylcarbene  
Silver Complex Intermediates by C(sp<sup>3</sup>)-H Bond Insertion**

*À. Díaz-Jiménez, R. Monreal-Corona, A. Poater\*, M. Álvarez, E. Borrego, P. J. Pérez\*,  
A. Caballero\*, A. Roglans\*, A. Pla-Quintana\**

# TABLE OF CONTENTS

|                                                                                                     |    |
|-----------------------------------------------------------------------------------------------------|----|
| General materials and methods .....                                                                 | 3  |
| S1. General scheme for the synthesis of diazo compounds 5a-j.....                                   | 4  |
| S2. Experimental procedure for the synthesis of propargyl alcohol (S1a).....                        | 4  |
| S3. General procedure for the synthesis of propargyl alcohols (S1b-S1e).....                        | 5  |
| S4. General procedure for the synthesis of propargyl esters (S2a-S2j) .....                         | 6  |
| S5. General procedure for the synthesis of diazo compounds (5a-5j).....                             | 11 |
| S6. Preparation of 5a-d <sub>6</sub> .....                                                          | 16 |
| S7. Silver catalyzed carbene/alkyne metathesis tandem reaction.....                                 | 18 |
| S7.1. NMR Characterization of compound 4 .....                                                      | 18 |
| S7.2. Optimization of silver catalyzed carbene/alkyne metathesis tandem reaction <sup>a</sup> ..... | 19 |
| S7.3. General procedure for the silver catalyzed carbene/alkyne metathesis tandem reaction<br>..... | 20 |
| S8 Crystal structure of compound 7a with probability level of 50 % .....                            | 26 |
| S9 Computational Details .....                                                                      | 29 |
| S10 Mechanism discussion.....                                                                       | 30 |
| S10.1. Formation of vinylcarbene species F .....                                                    | 30 |
| S10.2. Kinetic barriers towards vinylogous and carbenic products .....                              | 32 |
| S10.3. Steric hindrance towards vinylogous and carbenic products .....                              | 33 |
| S11 XYZ Coordinates.....                                                                            | 34 |
| S12 References.....                                                                                 | 61 |
| S13 NMR SPECTRA.....                                                                                | 62 |

## General materials and methods

Unless otherwise noted, materials were obtained from commercial suppliers and used without further purification. Diazo compound **1** was prepared as previously reported in the literature. <sup>[1]</sup> The identity of dihydroindole derivatives **2** and **3** was confirmed by comparing their spectral data with the reported one. <sup>[1]</sup> Activated molecular sieves (4Å) were added to commercially available anhydrous chloroform and nitrogen gas was bubbled for 30 minutes to ensure anhydrous and degassed conditions for the reaction solvent. Reaction progress during the preparation of all compounds was monitored using thin layer chromatography on Macherey-Nagel Xtra SIL G/UV254 silica gel plates. Solvents were removed under reduced pressure with a rotary evaporator. Reaction mixtures were chromatographed on silica gel using an automated purification instrument Interchim PuriFlash XS 520 Plus equipped with a quaternary gradient pump (up to 300 ml/min, 20 bar) and an UV-Vis 200-800 nm diode array detector. All <sup>1</sup>H and <sup>13</sup>C NMR spectra were recorded on a Bruker ASCEND 400 spectrometer equipped with a 5 mm BBFO probe using CDCl<sub>3</sub> a deuterated solvent. Chemical shifts for <sup>1</sup>H and <sup>13</sup>C NMR are reported in ppm (δ) relative to residual solvent signals (CDCl<sub>3</sub>: 7.26 ppm for <sup>1</sup>H, 77,16 ppm for <sup>13</sup>C). Coupling constants are given in Hertz (Hz). <sup>1</sup>H and <sup>13</sup>C NMR signals were assigned based on <sup>2</sup>D-NMR HSQC, HMBC, COSY and TOCSY experiments. Electrospray ionization high-resolution mass spectrometry was performed using a Bruker microTOF-Q II instrument operated in the positive ESI (+) ion mode. IR spectra were recorded on an Agilent Cary 630 FT-IR spectrometer equipped with an ATR sampling accessory. The X-ray intensity data were measured on a 'Bruker D8 QUEST ECO' three-circle diffractometer system equipped with a Ceramic x-ray tube (Mo Kα, λ = 0.71076 Å) and a doubly curved silicon crystal Bruker Triumph monochromator. Melting points were measured in a SMP10 apparatus from Stuart without any correction.

## S1. General scheme for the synthesis of diazo compounds 5a-j

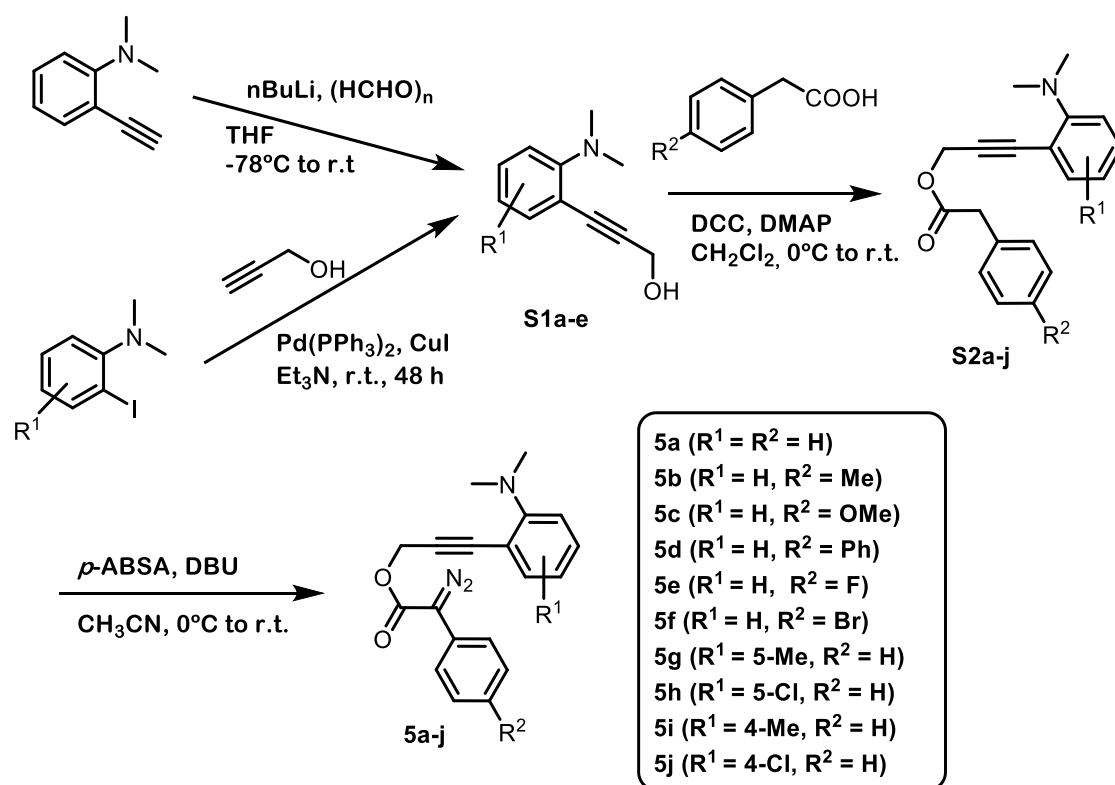

## S2. Experimental procedure for the synthesis of propargyl alcohol (S1a)

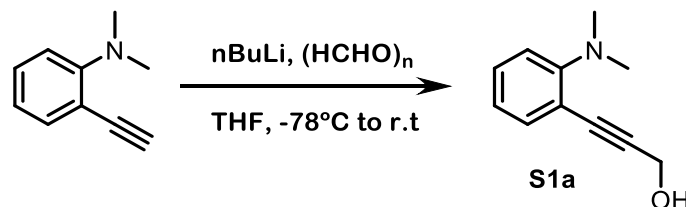

To a stirred solution of ***N,N*-dimethyl-2-ethynylaniline**,<sup>[2]</sup> (0.89 g, 6.16 mmol) in THF (30 mL) under a nitrogen atmosphere, a 1.6 M solution of *n*BuLi in hexane (5.0 mL, 8.0 mmol) was added dropwise. The resulting mixture was stirred at  $-78^\circ\text{C}$  for 1h and paraformaldehyde (0.55 g, 18.32 mmol) was then added in one portion. After the addition, the reaction mixture was slowly warmed to room temperature and stirred overnight. Upon completion of the reaction (TLC monitoring), the crude was partitioned into water and diethyl ether. The separated aqueous layer was then extracted with diethyl ether (twice) and the combined organic extracts were dried over anhydrous  $\text{Na}_2\text{SO}_4$  and concentrated under reduced pressure. The crude product was purified by column chromatography on silica gel (Hexanes:EtOAc = 9:1 to 7:3) to afford **S1a** as a brown oil (0.85 g, 79 % yield).

**MW ( $\text{C}_{11}\text{H}_{13}\text{NO}$ ):** 175.23 g/mol; **R<sub>f</sub>:** 0.20 (Hexanes/EtOAc 7:3);  **$^1\text{H NMR}$  ( $\text{CDCl}_3$ , 400 MHz):**  $\delta_{\text{H}}$  7.38 (dd,  $J = 7.5, 1.7$  Hz, 1H), 7.26 (ddd,  $J = 8.5, 7.5, 1.7$  Hz, 1H), 6.95 (d,  $J = 8.5$  Hz, 1H), 6.91 (td,  $J = 7.5, 1.1$  Hz, 1H), 4.55 (s, 2H), 3.36 (broad s, 1H), 2.91 (s, 6H).



$^{13}\text{C}\{^1\text{H}\}$  NMR ( $\text{CDCl}_3$ , 101 MHz):  $\delta_{\text{C}}$  154.9, 134.3, 129.4, 121.3, 117.3, 115.5, 93.0, 84.5, 51.6, 43.8. IR (ATR)  $\nu$  ( $\text{cm}^{-1}$ ): 3301, 2919, 1488, 1018, 742; HRMS (ESI)  $m/z$ : calcd. for  $\text{C}_{11}\text{H}_{13}\text{NONa}$   $[\text{M}+\text{Na}]^+$  198.0889; Found 198.0893.

### S3. General procedure for the synthesis of propargyl alcohols (S1b-S1e)

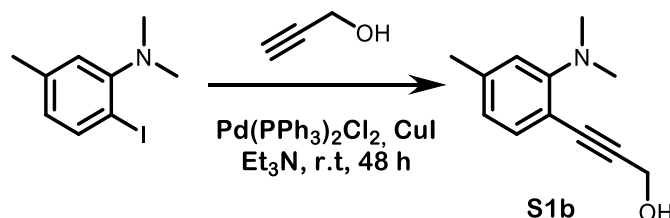

To a 100 mL round-bottom flask containing a mixture of *N,N*-Dimethyl-2-iodo-5-methylaniline<sup>[3]</sup> (1.51 g, 5.78 mmol),  $\text{CuI}$  (0.04 g, 0.23 mmol), and  $\text{Pd}(\text{PPh}_3)_2\text{Cl}_2$  (0.10 g, 0.14 mmol) in triethylamine (40 mL), propargyl alcohol (0.40 mL, 6.87 mmol) was added dropwise under a nitrogen atmosphere. After the addition, the solution was stirred at room temperature for 48h. Upon completion of the reaction (TLC monitoring), the crude was filtered through a Celite pad, rinsed with  $\text{EtOAc}$  and concentrated under reduced pressure. The crude product was then purified by column chromatography on silica gel ( $\text{CH}_2\text{Cl}_2/\text{AcOEt} = 98:2$ ) to afford **S1b** as a brown oil (0.52 g, 47 % yield).

**MW** ( $\text{C}_{12}\text{H}_{15}\text{NO}$ ): 189.26 g/mol; **Rf**: 0.38 ( $\text{CH}_2\text{Cl}_2/\text{EtOAc}$  8:2);  $^1\text{H}$  NMR ( $\text{CDCl}_3$ , 400 MHz):  $\delta_{\text{H}}$  7.26 (d,  $J = 7.7$  Hz, 1H), 6.73 (s, 1H), 6.70 (d,  $J = 7.7$  Hz, 1H), 4.52 (s, 2H), 2.89 (s, 6H), 2.72 (broad s, 1H), 2.32 (s, 3H).  $^{13}\text{C}\{^1\text{H}\}$  NMR ( $\text{CDCl}_3$ , 101 MHz):  $\delta_{\text{C}}$  154.9, 139.7, 134.2, 122.1, 118.1, 112.4, 92.2, 84.8, 51.9, 43.8, 21.9. IR (ATR)  $\nu$  ( $\text{cm}^{-1}$ ): 3297, 2915, 1599, 1498, 1019, 807. HRMS (ESI)  $m/z$ : calcd. for  $\text{C}_{12}\text{H}_{15}\text{NONa}$   $[\text{M}+\text{Na}]^+$  212.1046; Found 212.1052.

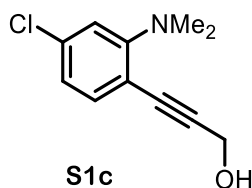

Propargyl alcohol **S1c** was obtained from *N,N*-Dimethyl-2-iodo-5-chloroaniline<sup>[4]</sup> (1.18 g, 4.19 mmol) as a brown oil (0.29 g, 33 %) following the same procedure as for **S1b**.

**MW** ( $\text{C}_{11}\text{H}_{12}\text{ClNO}$ ): 209.67 g/mol; **Rf**: 0.28 ( $\text{CH}_2\text{Cl}_2/\text{EtOAc}$  8:2);  $^1\text{H}$  NMR ( $\text{CDCl}_3$ , 400 MHz):  $\delta_{\text{H}}$  7.28 (dd,  $J = 8.2, 1.4$  Hz, 1H), 6.86 (d,  $J = 2.0$  Hz, 1H), 6.83 (dd,  $J = 8.2, 2.0$  Hz, 1H), 4.53 (d,  $J = 5.7$  Hz, 2H), 2.92 (s, 6H), 2.04 (broad s, 1H).  $^{13}\text{C}\{^1\text{H}\}$  NMR ( $\text{CDCl}_3$ , 101 MHz):  $\delta_{\text{C}}$  155.9, 135.4, 135.3, 120.8, 117.6, 113.0, 93.4, 84.1, 52.0, 43.5. IR (ATR)  $\nu$  ( $\text{cm}^{-1}$ ): 3290, 2839, 1581, 1452, 1019, 818. HRMS (ESI)  $m/z$ : calcd. for  $\text{C}_{11}\text{H}_{13}\text{ClNO}$   $[\text{M}+\text{H}]^+$  210.0680; Found 210.0689.

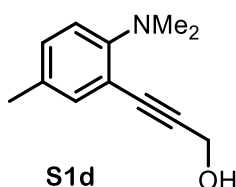

Propargyl alcohol **S1d** was obtained from *N,N*-Dimethyl-2-iodo-4-methylaniline<sup>[5]</sup> (2.53 g, 9.69 mmol) as a brown oil (0.85 g, 46%) following the same procedure as for **S1b**.

**MW (C<sub>12</sub>H<sub>15</sub>NO):** 189.26 g/mol; **Rf:** 0.25 (CH<sub>2</sub>Cl<sub>2</sub>/EtOAc 8:2); **<sup>1</sup>H NMR (CDCl<sub>3</sub>, 400 MHz):** δ<sub>H</sub> 7.21 (d, *J* = 2.2 Hz, 1H), 7.06 (dd, *J* = 8.3, 2.2 Hz, 1H), 6.84 (d, *J* = 8.3 Hz, 1H), 4.53 (s, 2H), 2.87 (s, 6H), 2.24 (s, 3H). **<sup>13</sup>C{<sup>1</sup>H} NMR (CDCl<sub>3</sub>, 101 MHz):** δ<sub>C</sub> 152.8, 134.8, 130.7, 130.3, 117.3, 115.4, 92.5, 84.8, 51.9, 44.1, 20.4. **IR (ATR) ν (cm<sup>-1</sup>):** 3309, 2919, 1737, 1497, 1029, 814. **HRMS (ESI) m/z:** calcd. for C<sub>12</sub>H<sub>15</sub>NONa [M+Na]<sup>+</sup> 212.1046; Found 212.1049.

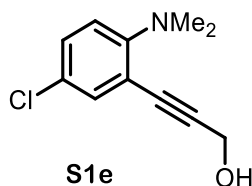

Propargyl alcohol **S1e** was obtained from *N,N*-Dimethyl-2-iodo-4-chloroaniline<sup>[5]</sup> (2.53 g, 8.99 mmol) as a brown oil (1.09 g, 58%) following the same procedure as for **S1b**.

**MW (C<sub>11</sub>H<sub>12</sub>ClNO):** 209.67 g/mol; **Rf:** 0.28 (CH<sub>2</sub>Cl<sub>2</sub>/EtOAc 8:2); **<sup>1</sup>H NMR (CDCl<sub>3</sub>, 400 MHz):** δ<sub>H</sub> 7.34 (d, *J* = 2.6 Hz, 1H), 7.18 (dd, *J* = 8.8, 2.6 Hz, 1H), 6.83 (d, *J* = 8.8 Hz, 1H), 4.54 (s, 2H), 2.89 (s, 6H). **<sup>13</sup>C{<sup>1</sup>H} NMR (CDCl<sub>3</sub>, 101 Mz):** δ<sub>C</sub> 153.7, 133.873, 129.5, 125.6, 118.5, 116.4, 93.7, 83.7, 51.9, 43.7. **IR (ATR) ν (cm<sup>-1</sup>):** 3294, 2917, 1487, 1022, 812. **HRMS (ESI) m/z:** calcd. for C<sub>11</sub>H<sub>12</sub>ClNONa [M+Na]<sup>+</sup> 232.0500; Found 232.0507.

#### S4. General procedure for the synthesis of propargyl esters (S2a-S2j)

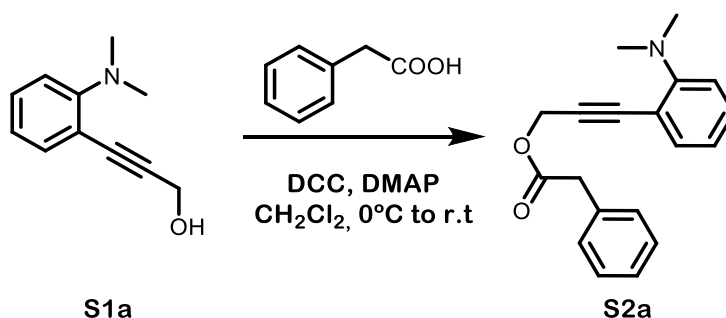

To a 25 mL round-bottom flask containing a mixture of **S1a** (0.22 g, 1.26 mmol), phenylacetic acid (0.17 g, 1.25 mmol), and 4-dimethylaminopyridine (DMAP) (13.9 mg, 0.11 mmol) in dichloromethane (6mL), *N,N'*-dicyclohexylcarbodiimide (DCC) (0.28 g, 1.36 mmol) was added in batches at 0 °C. After the addition, the reaction mixture was slowly warmed to room temperature and stirred overnight. Upon completion of the reaction (TLC monitoring), the crude was filtrated

through a Celite pad, rinsed with EtOAc and concentrated under reduced pressure. The crude product was then purified by column chromatography on silica gel (Hexanes/EtOAc = 95:05) to afford ester **S2a** as a yellow oil (0.31 g, 86 % yield).

**MW (C<sub>19</sub>H<sub>19</sub>NO<sub>2</sub>):** 293.37 g/mol; **Rf:** 0.50 (Hexanes/EtOAc 8:2); **<sup>1</sup>H NMR (CDCl<sub>3</sub>, 400 MHz):** δ<sub>H</sub> 7.40 (dd, *J* = 7.6, 1.4 Hz, 1H), 7.37 – 7.26 (m, 5H), 7.26 – 7.23 (m, 1H), 6.90 (d, *J* = 8.3 Hz, 1H), 6.86 (td, *J* = 7.6, 1.1 Hz, 1H), 5.00 (s, 2H), 3.70 (s, 2H), 2.90 (s, 6H) **<sup>13</sup>C{H} NMR (CDCl<sub>3</sub>, 101 MHz):** δ<sub>C</sub> 171.0, 155.3, 134.8, 133.7, 129.8, 129.4, 128.7, 127.3, 120.6, 117.0, 114.2, 88.1, 86.1, 53.7, 43.6, 41.3. **IR (ATR) ν (cm<sup>-1</sup>):** 2918, 1736, 1491, 1135, 754. **HRMS (ESI) m/z:** calcd. for C<sub>19</sub>H<sub>19</sub>NO<sub>2</sub>Na [M+Na]<sup>+</sup> 316.1308; Found 316.1312.

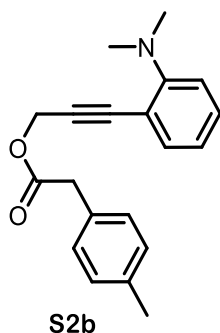

Ester **S2b** was obtained from **S1a** (0.35 g, 1.98 mmol) as yellow oil (0.25 g, 41%) following the same procedure as for **S2a**.

**MW (C<sub>20</sub>H<sub>21</sub>NO<sub>2</sub>):** 307.39 g/mol; **Rf:** 0.53 (Hexanes/EtOAc 8:2); **<sup>1</sup>H NMR (CDCl<sub>3</sub>, 400 MHz):** δ<sub>H</sub> 7.38 (dd, *J* = 7.8, 1.7 Hz, 1H), 7.26 – 7.22 (m, 1H (overlapped with chloroform)), 7.19 (d, *J* = 8.2 Hz, 2H), 7.13 (d, *J* = 7.8 Hz, 2H), 6.89 (dd, *J* = 8.2, 1.1 Hz, 1H), 6.85 (dt, *J* = 7.4, 1.1 Hz, 1H), 4.98 (s, 2H), 3.65 (s, 2H), 2.89 (s, 6H), 2.33 (s, 3H). **<sup>13</sup>C{H} NMR (CDCl<sub>3</sub>, 101 MHz):** δ<sub>C</sub> 171.2, 155.3, 136.9, 134.8, 130.7, 129.8, 129.4, 129.3, 120.5, 117.0, 114.2, 88.2, 86.0, 53.7, 43.6, 40.8, 21.2. **IR (ATR) ν (cm<sup>-1</sup>):** 2938, 1736, 1490, 1133, 755. **HRMS (ESI) m/z:** calcd. for C<sub>20</sub>H<sub>21</sub>NO<sub>2</sub>Na [M+Na]<sup>+</sup> 330.1465; Found 330.1462.

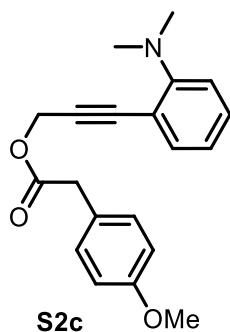

Ester **S2c** was obtained from **S1a** (0.19 g, 1.09 mmol) as a yellow oil (0.32 g, 92%) following the same procedure as for **S2a**.

**MW (C<sub>20</sub>H<sub>21</sub>NO<sub>3</sub>):** 323.39 g/mol; **Rf:** 0.33 (Hexanes/EtOAc 8:2); **<sup>1</sup>H NMR (CDCl<sub>3</sub>, 400 MHz):** δ<sub>H</sub> 7.38 (dd, *J* = 7.6, 1.7 Hz, 1H), 7.26 – 7.19 (m, 3H), 6.88 (d, *J* = 8.2 Hz, 1H), 6.87 – 6.81 (m, 3H), 4.97 (s, 2H), 3.77 (s, 3H), 3.62 (s, 2H), 2.88 (s, 6H). **<sup>13</sup>C{H} NMR (CDCl<sub>3</sub>, 101 MHz):** δ<sub>C</sub> 171.3, 158.8, 155.2, 134.7, 130.4, 129.8, 125.8, 120.5, 117.0, 114.1, 88.2, 86.0, 55.3, 53.6, 43.6, 40.3. **IR (ATR) ν (cm<sup>-1</sup>):** 2936, 1735, 1510, 1243, 1133, 755. **HRMS (ESI) m/z:** calcd. for C<sub>20</sub>H<sub>21</sub>NO<sub>3</sub>Na [M+Na]<sup>+</sup> 346.1414; Found 346.1405.

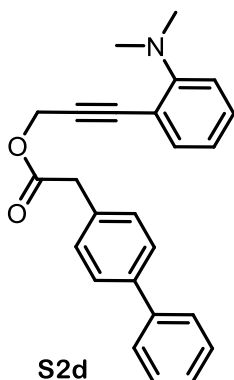

Ester **S2d** was obtained from **S1a** (0.26 g, 1.46 mmol) as a yellow oil (0.28 g, 52%) following the same procedure as for **S2a**.

**MW (C<sub>25</sub>H<sub>23</sub>NO<sub>2</sub>):** 369.46 g/mol; **Rf:** 0.43 (Hexanes/EtOAc 8:2); **<sup>1</sup>H NMR (CDCl<sub>3</sub>, 400 MHz):** δ<sub>H</sub> 7.59 – 7.54 (m, 4H), 7.47 – 7.41 (m, 2H), 7.41 – 7.37 (m, 3H), 7.37 – 7.32 (m, 1H), 7.26 – 7.22 (m, 1H), 6.89 (dd, *J* = 8.3, 1.1 Hz, 1H), 6.85 (dt, *J* = 7.4, 1.1 Hz, 1H), 5.01 (s, 2H), 3.74 (s, 2H), 2.89 (s, 6H). **<sup>13</sup>C{H} NMR (CDCl<sub>3</sub>, 101 MHz):** δ<sub>C</sub> 171.0, 155.3, 140.9, 140.3, 134.8, 132.8, 129.8, 128.9, 127.5, 127.4, 127.2, 120.6, 117.1, 114.1, 88.1, 86.1, 53.8, 43.6, 40.9); **IR (ATR) ν (cm<sup>-1</sup>):** 2937, 1735, 1487, 1135, 752. **HRMS (ESI) m/z:** calcd. for C<sub>25</sub>H<sub>24</sub>NO<sub>2</sub> [M+H]<sup>+</sup> 370.1802; Found 370.1813

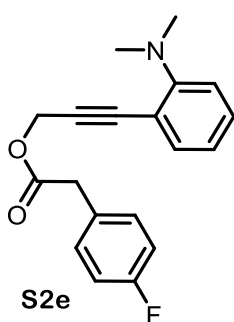

Ester **S2e** was obtained from **S1a** (0.19 g, 1.09 mmol) as a brown oil (0.30 g, 89%) following the same procedure as for **S2a**.

**MW (C<sub>19</sub>H<sub>18</sub>FNO<sub>2</sub>):** 311.36 g/mol; **Rf:** 0.3 (Hexanes/EtOAc 8:2); **<sup>1</sup>H NMR (CDCl<sub>3</sub>, 400 MHz):** δ<sub>H</sub> 7.38 (dd, *J* = 7.6, 1.7 Hz, 1H), 7.30 – 7.22 (m, 3H (overlapped with chloroform)), 7.05 – 6.97 (m, 2H), 6.90 (dd, *J* = 8.3, 1.1 Hz, 1H), 6.86 (td, *J* = 7.4, 1.1 Hz, 1H), 4.99 (s, 2H), 3.66 (s, 2H), 2.89 (s, 6H). **<sup>13</sup>C{H} NMR (CDCl<sub>3</sub>, 101 MHz):** δ<sub>C</sub> 170.9, 162.2 (d, <sup>1</sup>*J*<sub>C-F</sub> = 246.4 Hz), 155.3, 134.8, 131.0

(d,  $^3J_{C-F}$  = 8.1 Hz), 129.9, 129.4 (d,  $^4J_{C-F}$  = 3.3 Hz), 120.6, 117.1, 115.6 (d,  $^2J_{C-F}$  = 21.5 Hz), 114.1, 88.0, 86.2, 53.8, 43.6, 40.3.  **$^{19}\text{F}$  NMR (CDCl<sub>3</sub>, 376 MHz):**  $\delta_{\text{F}}$  -116.51 (s, 1F). **IR (ATR)  $\nu$  (cm<sup>-1</sup>):** 2926, 1736, 1134, 1219, 753. **HRMS (ESI) m/z:** calcd. for C<sub>19</sub>H<sub>18</sub>FNO<sub>2</sub>Na [M+Na]<sup>+</sup> 334.1214; Found 334.1222.

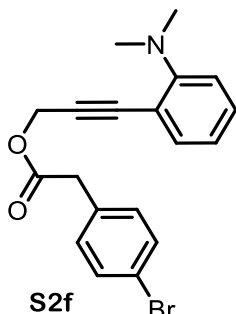

Ester **S2f** was obtained from **S1a** (0.19 g, 1.09 mmol) as a yellow oil (0.36 g, 88%) following the same procedure as for **S2a**.

**MW (C<sub>19</sub>H<sub>18</sub>BrNO<sub>2</sub>):** 372.26 g/mol; **Rf:** 0.33 (Hexanes/EtOAc 8:2);  **$^1\text{H}$  NMR (CDCl<sub>3</sub>, 400 MHz):**  $\delta_{\text{H}}$  7.49 – 7.42 (m, 2H), 7.39 (dd,  $J$  = 7.6, 1.7 Hz, 1H), 7.30 – 7.22 (m, 1H (overlapped with chloroform)), 7.22 – 7.16 (m, 2H), 6.90 (dd,  $J$  = 8.3, 1.1 Hz, 1H), 6.86 (td,  $J$  = 7.4, 1.1 Hz, 1H), 4.99 (s, 2H), 3.64 (s, 2H), 2.89 (s, 6H).  **$^{13}\text{C}\{^1\text{H}\}$  NMR (CDCl<sub>3</sub>, 101 MHz):**  $\delta_{\text{C}}$  170.4, 155.2, 134.7, 132.7, 131.8, 131.1, 129.9, 121.4, 120.5, 117.0, 114.0, 87.9, 86.2, 53.8, 43.6, 40.6. **IR (ATR)  $\nu$  (cm<sup>-1</sup>):** 2936, 1736, 1487, 1137, 753. **HRMS (ESI) m/z:** calcd. for C<sub>19</sub>H<sub>19</sub>BrNO<sub>2</sub> [M+H]<sup>+</sup> 372.0594-374.0574; Found 372.0597-374.0577.

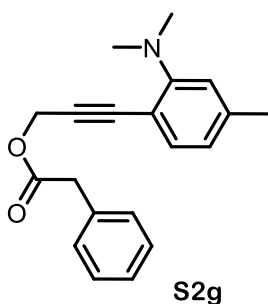

Ester **S2g** was obtained from **S1b** (0.21 g, 1.11 mmol) as a yellow oil (0.32 g, 94%) following the same procedure as for **S2a**.

**MW (C<sub>20</sub>H<sub>21</sub>NO<sub>2</sub>):** 307.39 g/mol; **Rf:** 0.38 (Hexanes/EtOAc 8:2);  **$^1\text{H}$  NMR (CDCl<sub>3</sub>, 400 MHz):**  $\delta_{\text{H}}$  7.36 – 7.25 (m, 6H), 6.70 (s, 1H), 6.69 – 6.66 (m, 1H), 4.98 (s, 2H), 3.69 (s, 2H), 2.88 (s, 6H), 2.32 (s, 3H).  **$^{13}\text{C}\{^1\text{H}\}$  NMR (CDCl<sub>3</sub>, 101 MHz):**  $\delta_{\text{C}}$  171.0, 153.1, 135.1, 133.8, 130.6, 130.2, 129.4, 128.7, 127.3, 117.2, 114.5, 87.8, 86.1, 53.8, 43.9, 41.3, 20.3. **IR (ATR)  $\nu$  (cm<sup>-1</sup>):** 2969, 1757, 1341, 770. **HRMS (ESI) m/z:** calcd. for C<sub>20</sub>H<sub>21</sub>NO<sub>2</sub>Na [M+Na]<sup>+</sup> 330.1465; Found 330.1467.

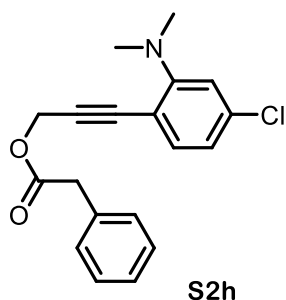

Ester **S2h** was obtained from **S1c** (0.30 g, 1.44 mmol) as a yellow oil (0.36 g, 76%) following the same procedure as for **S2a**.

**MW (C<sub>19</sub>H<sub>18</sub>ClNO<sub>2</sub>):** 327.81 g/mol; **Rf:** 0.60 (Hexanes/EtOAc 8:2); **<sup>1</sup>H NMR (CDCl<sub>3</sub>, 400 MHz):** δ<sub>H</sub> 7.36 – 7.26 (m, 6H), 6.83 (d, *J* = 2.0 Hz, 1H), 6.80 (dd, *J* = 8.1, 2.0 Hz, 1H), 4.96 (s, 2H), 3.69 (s, 2H), 2.89 (s, 6H). **<sup>13</sup>C{<sup>1</sup>H} NMR (CDCl<sub>3</sub>, 101 MHz):** δ<sub>C</sub> 171.0, 156.0, 135.7, 135.6, 133.7, 129.4, 128.8, 127.4, 120.3, 117.3, 112.0, 88.9, 85.3, 53.6, 43.3, 41.3. **IR (ATR) ν (cm<sup>-1</sup>):** 2941, 1736, 1491, 1134. **HRMS (ESI) m/z:** calcd. for C<sub>19</sub>H<sub>18</sub>ClNO<sub>2</sub>Na [M+Na]<sup>+</sup> 350.0918; Found 350.0920.

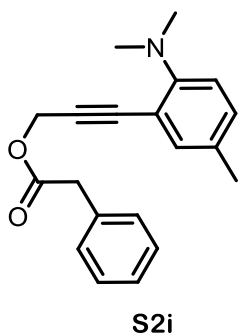

Ester **S2i** was obtained from **S1d** (0.31 g, 1.62 mmol) as a brown oil (0.32 g, 64%) following the same procedure as for **S2a**.

**MW (C<sub>20</sub>H<sub>21</sub>NO<sub>2</sub>):** 307.39 g/mol; **Rf:** 0.42 (Hexanes/EtOAc 8:2); **<sup>1</sup>H NMR (CDCl<sub>3</sub>, 400 MHz):** δ<sub>H</sub> 7.37 – 7.26 (m, 5H), 7.22 (d, *J* = 2.2 Hz, 1H), 7.06 (dd, *J* = 8.3, 2.2 Hz, 1H), 6.81 (d, *J* = 8.3 Hz, 1H), 4.98 (s, 2H), 3.69 (s, 2H), 2.84 (s, 6H), 2.24 (s, 3H). **<sup>13</sup>C{<sup>1</sup>H} NMR (CDCl<sub>3</sub>, 101 MHz):** δ<sub>C</sub> 171.0, 153.1, 135.1, 133.8, 130.6, 130.2, 129.4, 128.7, 127.3, 117.2, 114.4, 87.8, 86.1, 53.8, 43.9, 41.3, 20.3. **IR (ATR) ν (cm<sup>-1</sup>):** 2917, 1736, 1499, 1125. **HRMS (ESI) m/z:** calcd. for C<sub>20</sub>H<sub>21</sub>NO<sub>2</sub>Na [M+Na]<sup>+</sup> 330.1465; Found 330.1466.

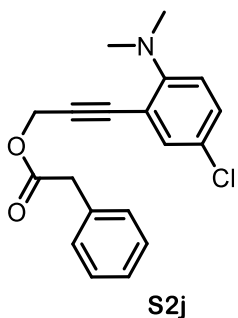

Ester **S2j** was obtained from **S1e** (0.30 g, 1.44 mmol) as a brown oil (0.27 g, 58%) following the same procedure as for **S2a**.

**MW** ( $C_{19}H_{18}ClNO_2$ ): 327.81 g/mol; **Rf**: 0.40 (Hexanes/EtOAc 8:2);  **$^1H$  NMR** ( $CDCl_3$ , 400 MHz):  $\delta_H$  7.36 – 7.26 (m, 6H), 7.18 (dd,  $J$  = 8.8, 2.6 Hz, 1H), 6.80 (d,  $J$  = 8.8 Hz, 1H), 4.97 (s, 2H), 3.69 (s, 2H), 2.86 (s, 6H).  **$^{13}C$ {H} NMR** ( $CDCl_3$ , 101 MHz):  $\delta_C$  170.9, 153.8, 134.0, 133.7, 129.7, 129.4, 128.8, 127.4, 125.2, 118.2, 115.4, 89.2, 84.8, 53.5, 43.6, 41.3. **IR (ATR)  $\nu$  ( $cm^{-1}$ )**: 2940, 1736, 1490, 1127. **HRMS (ESI)  $m/z$** : calcd. for  $C_{19}H_{18}ClNO_2Na$  [ $M+Na$ ] $^+$  350.0918; Found 350.0930.

## S5. General procedure for the synthesis of diazo compounds (5a-5j)

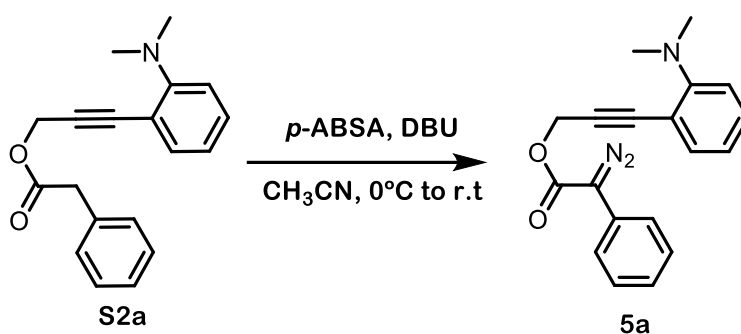

To a 25 mL oven-dried flask containing a mixture of **S2a** (0.21 g, 0.72 mmol) and *p*-acetamidobenzenesulfonyl azide (*p*-ABSA) (0.21 g, 0.87 mmol) in anhydrous  $CH_3CN$  (4.5 mL), a solution of 1,8-diazabicyclo[5.4.0]undec-7-ene (DBU) (0.15 mL, 1.00 mmol) in anhydrous  $CH_3CN$  (0.9 mL) was added dropwise at 0 °C. After the addition, the reaction mixture was slowly warmed to room temperature and stirred overnight. Upon completion of the reaction (TLC monitoring), the crude was diluted with  $Et_2O$ , and washed with saturated aqueous  $NH_4Cl$ , saturated aqueous  $NaHCO_3$  and brine. The combined organic extracts were dried over anhydrous  $Na_2SO_4$  and concentrated under reduced pressure. The crude product was purified by column chromatography on silica gel (Hexanes: EtOAc:  $Et_3N$  = 96:3:1) to afford diazo compound **5a** as an orange oil (0.20 g, 94% yield).

**MW** ( $C_{19}H_{17}N_3O_2$ ): 319.36 g/mol; **Rf**: 0.63 (Hexanes/EtOAc 8:2);  **$^1H$  NMR** ( $CDCl_3$ , 400 MHz):  $\delta_H$  7.53 – 7.48 (m, 2H), 7.44 – 7.36 (m, 3H), 7.29 – 7.23 (m, 1H (overlapped with chloroform)), 7.23 – 7.17 (m, 1H), 6.91 (dd,  $J$  = 8.4, 1.1 Hz, 1H), 6.87 (td,  $J$  = 7.4, 1.1 Hz, 1H), 5.17 (s, 2H), 2.93 (s, 6H).  **$^{13}C$ {H} NMR** ( $CDCl_3$ , 101 MHz):  $\delta_C$  164.6, 155.3, 134.8, 129.9, 129.1, 126.1, 125.4, 124.2, 120.6, 117.1, 114.1 88.2, 86.3, 53.7, 43.7. **IR (ATR)  $\nu$  ( $cm^{-1}$ )**: 2925, 2082, 1699, 1238, 1140, 751. **HRMS (ESI)  $m/z$** : calcd. for  $C_{19}H_{17}N_3O_2Na$  [ $M+Na$ ] $^+$  342.1213; Found 342.1213.

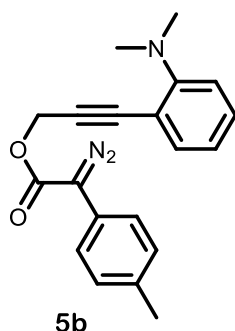

Diazo compound **5b** was obtained from **S2b** (0.18 g, 0.59 mmol) as an orange oil (0.17 g, 86%) following the same procedure as for **5a**.

**MW (C<sub>20</sub>H<sub>19</sub>N<sub>3</sub>O<sub>2</sub>):** 333.39 g/mol; **Rf:** 0.64 (Hexanes/EtOAc 8:2); **<sup>1</sup>H NMR (CDCl<sub>3</sub>, 400 MHz):** δ<sub>H</sub> 7.42 (dd, *J* = 7.6, 1.7 Hz, 1H), 7.38 (d, *J* = 8.2 Hz, 2H), 7.28 – 7.23 (m, 1H (overlapped with chloroform)), 7.21 (d, *J* = 8.2 Hz, 2H), 6.90 (dd, *J* = 8.3, 1.1 Hz, 1H), 6.86 (td, *J* = 7.5, 1.1 Hz, 1H), 5.16 (s, 2H), 2.93 (s, 6H), 2.35 (s, 3H). **<sup>13</sup>C{H} NMR (CDCl<sub>3</sub>, 101 MHz):** δ<sub>C</sub> 164.9, 155.3, 136.0, 134.8, 129.9, 129.8, 124.3, 122.0, 120.6, 117.1, 114.2, 88.3, 86.3, 53.7, 43.7, 21.2. **IR (ATR) ν (cm<sup>-1</sup>):** 2919, 2082, 1703, 1241, 1139, 756. **HRMS (ESI) m/z:** calcd. for C<sub>20</sub>H<sub>19</sub>N<sub>3</sub>O<sub>2</sub>Na [M+Na]<sup>+</sup> 356.1369; Found 356.1367.

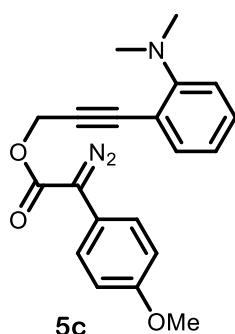

Diazo compound **5c** was obtained from **S2c** (0.18 g, 0.56 mmol) as an orange oil (0.17 g, 88%) following the same procedure as for **5a**.

**MW (C<sub>20</sub>H<sub>19</sub>N<sub>3</sub>O<sub>3</sub>):** 349.39 g/mol; **Rf:** 0.45 (Hexanes/EtOAc 8:2); **<sup>1</sup>H NMR (CDCl<sub>3</sub>, 400 MHz):** δ<sub>H</sub> 7.43 – 7.38 (m, 3H), 7.28 – 7.23 (m, 1H (overlapped with chloroform)), 6.97 – 6.93 (m, 2H), 6.90 (d, *J* = 7.4 Hz, 1H), 6.86 (td, *J* = 7.4, 1.1 Hz, 1H), 5.15 (s, 2H), 3.81 (s, 3H), 2.93 (s, 6H). **<sup>13</sup>C{H} NMR (CDCl<sub>3</sub>, 101 MHz):** δ<sub>C</sub> 165.0, 158.2, 155.2, 134.7, 129.8, 126.1, 120.5, 117.0, 116.7, 114.7, 114.0, 88.2, 86.1, 55.4, 53.5, 43.6. **IR (ATR) ν (cm<sup>-1</sup>):** 2920, 2079, 1696, 1239, 1141, 754. **HRMS (ESI) m/z:** calcd. for C<sub>20</sub>H<sub>20</sub>NO<sub>3</sub> [M+H-N<sub>2</sub>]<sup>+</sup> 322.1438; Found 322.1449.



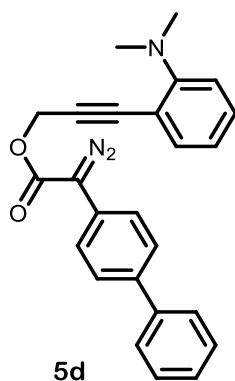

Diazo compound **5d** was obtained from **S2d** (0.15 g, 0.41 mol) as an orange solid (0.15 g, 93%) following the same procedure as for **5a**.

**MW (C<sub>25</sub>H<sub>21</sub>N<sub>3</sub>O<sub>2</sub>):** 395.46 g/mol; **Rf:** 0.53 (Hexanes/EtOAc 8:2); **<sup>1</sup>H NMR (CDCl<sub>3</sub>, 400 MHz):** δ<sub>H</sub> 7.67 – 7.55 (m, 6H), 7.48 – 7.41 (m, 3H), 7.38 – 7.32 (m, 1H), 7.29 – 7.23 (m, 12H, (overlapped with chloroform)), 6.91 (dd, *J* = 8.3, 1.1 Hz, 1H), 6.87 (td, *J* = 7.5, 1.1 Hz, 1H), 5.19 (s, 2H), 2.94 (s, 6H). **<sup>13</sup>C{<sup>1</sup>H} NMR (CDCl<sub>3</sub>, 101 MHz):** δ<sub>C</sub> 164.6, 155.3, 140.4, 138.9, 134.8, 129.9, 129.0, 127.8, 127.5, 127.0, 124.5, 124.3, 120.6, 117.1, 88.2, 86.4, 53.8, 43.7. **IR (ATR) ν (cm<sup>-1</sup>):** 2935, 2086, 1704, 1234, 1141, 752. **HRMS (ESI)m/z:** calcd. for C<sub>25</sub>H<sub>21</sub>N<sub>3</sub>O<sub>2</sub>Na [M+Na]<sup>+</sup> 418.1526; Found 418.1536.

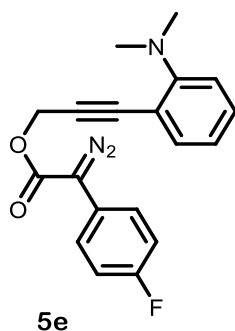

Diazo compound **5e** was obtained from **S2e** (0.19 g, 0.61 mmol) as an orange solid (0.19 g, 92%) following the same procedure as for **5a**.

**MW (C<sub>19</sub>H<sub>16</sub>FN<sub>3</sub>O<sub>2</sub>):** 337.35 g/mol; **Rf:** 0.55 (Hexanes/EtOAc 8:2); **<sup>1</sup>H NMR (CDCl<sub>3</sub>, 400 MHz):** δ<sub>H</sub> 7.49 – 7.43 (m, 2H), 7.41 (dd, *J* = 7.6, 1.7 Hz, 1H), 7.29 – 7.22 (m, 1H (overlapped with chloroform)), 7.14 – 7.06 (m, 2H), 6.91 (dd, *J* = 8.4, 1.1 Hz, 1H), 6.87 (td, *J* = 7.6, 1.1 Hz, 1H), 5.16 (s, 2H), 2.93 (s, 6H). **<sup>13</sup>C{<sup>1</sup>H} NMR (CDCl<sub>3</sub>, 101 MHz):** δ<sub>C</sub> 164.6, 161.2 (d, <sup>1</sup>*J*<sub>C-F</sub> = 247.4 Hz), 155.3, 134.8, 129.9, 126.1 (d, <sup>3</sup>*J*<sub>C-F</sub> = 7.9 Hz), 121.1 (d, <sup>4</sup>*J*<sub>C-F</sub> = 3.2 Hz), 120.6, 117.1, 116.1 (d, <sup>2</sup>*J*<sub>C-F</sub> = 22.2 Hz), 114.1, 88.1, 86.4, 53.8, 43.7. **<sup>19</sup>F NMR (376 MHz, CDCl<sub>3</sub>):** δ<sub>F</sub> -116.96. (s, 1F). **IR (ATR) ν (cm<sup>-1</sup>):** 2938, 2083, 1742, 1230, 1145, 752. **HRMS (ESI) m/z:** calcd. for C<sub>19</sub>H<sub>16</sub>FN<sub>3</sub>O<sub>2</sub>Na [M+Na]<sup>+</sup> 360.1119; Found 360.1119.

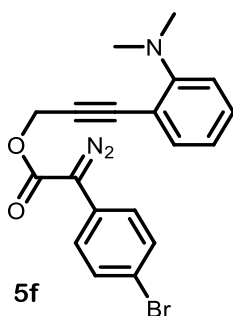

Diazo compound **5f** was obtained from **S2f** (0.21 g, 0.56 mmol) as an orange solid (0.22 g, 99%) following the same procedure as for **5a**.

**MW (C<sub>19</sub>H<sub>16</sub>BrN<sub>3</sub>O<sub>2</sub>):** 398.26 g/mol; **Rf:** 0.60 (Hexanes/EtOAc 8:2) **<sup>1</sup>H NMR (CDCl<sub>3</sub>, 400 MHz):** δ<sub>H</sub> 7.53 – 7.48 (m, 2H), 7.41 (dd, *J* = 7.5, 1.7 Hz, 1H), 7.40 – 7.35 (m, 1H), 7.29 – 7.23 (m, 1H, overlapped with chloroform), 6.91 (dd, *J* = 8.3, 1.1 Hz, 1H), 6.86 (td, *J* = 7.5, 1.1 Hz, 1H), 5.16 (s, 2H), 2.93 (s, 6H). **<sup>13</sup>C{<sup>1</sup>H} NMR (CDCl<sub>3</sub>, 101 MHz):** δ<sub>C</sub> 164.2, 155.3, 134.8, 132.2, 130.0, 125.5, 124.6, 120.6, 119.7, 117.1, 114.0, 88.0, 86.5, 53.9, 43.7. **IR (ATR) ν (cm<sup>-1</sup>):** 2941, 2086, 1703, 1237, 1147, 754. **HRMS (ESI) m/z:** calcd. for C<sub>19</sub>H<sub>16</sub>BrN<sub>3</sub>O<sub>2</sub>Na [M+Na]<sup>+</sup> 420.0318-422.0298; Found 420.0321-422.0303.

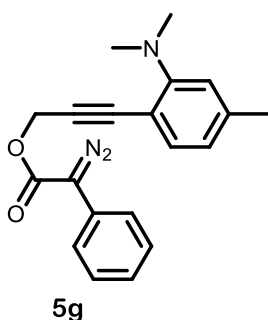

Diazo compound **5g** was obtained from **S2g** (0.16 g, 0.52 mmol) as an orange solid (0.15 g, 87%) following the same procedure as for **5a**.

**MW (C<sub>20</sub>H<sub>19</sub>N<sub>3</sub>O<sub>2</sub>):** 333.39 g/mol; **Rf:** 0.63 (Hexanes/EtOAc 8:2); **<sup>1</sup>H NMR (CDCl<sub>3</sub>, 400 MHz):** δ<sub>H</sub> 7.52 – 7.47 (m, 2H), 7.42 – 7.36 (m, 2H), 7.31 (d, *J* = 7.6 Hz, 1H), 7.20 (td, *J* = 7.2, 1.2 Hz, 1H), 6.71 (s, 1H), 6.69 (d, *J* = 7.6 Hz, 1H), 5.16 (s, 2H), 2.92 (s, 6H), 2.32 (s, 3H). **<sup>13</sup>C{<sup>1</sup>H} NMR (CDCl<sub>3</sub>, 101 MHz):** δ<sub>C</sub> 164.6, 155.2, 140.2, 134.6, 129.1, 126.1, 125.4, 124.2, 121.6, 117.9, 111.2, 87.5, 86.5, 53.8, 43.7, 22.0. **IR (ATR) ν (cm<sup>-1</sup>):** 2940, 2087, 1699, 1241, 1142, 753. **HRMS (ESI) m/z:** calcd. for C<sub>20</sub>H<sub>19</sub>N<sub>3</sub>O<sub>2</sub>Na [M+Na]<sup>+</sup> 356.1369; Found 356.1372.

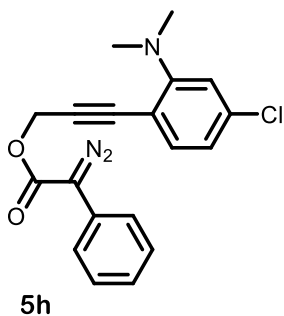

Diazo compound **5h** was obtained from **S2h** (0.18 g, 0.55 mmol) as an orange solid (0.16 g, 82%) following the same procedure as for **5a**.

**MW (C<sub>19</sub>H<sub>16</sub>ClN<sub>3</sub>O<sub>2</sub>):** 353.81 g/mol; **Rf:** 0.65 (Hexanes/EtOAc 8:2); **<sup>1</sup>H NMR (CDCl<sub>3</sub>, 400 MHz):** δ<sub>H</sub> 7.52 – 7.47 (m, 2H), 7.43 – 7.36 (m, 2H), 7.31 (d, *J* = 8.1 Hz, 1H), 7.23 – 7.16 (m, 1H), 6.84 (d, *J* = 2.0 Hz, 1H), 6.82 (dd, *J* = 8.1, 2.0 Hz, 1H), 5.14 (s, 2H), 2.94 (s, 6H). **<sup>13</sup>C{H} NMR (CDCl<sub>3</sub>, 101 MHz):** δ<sub>C</sub> 164.5, 156.1, 135.7, 129.1, 126.2, 125.3, 124.2, 120.4, 117.4, 111.9, 88.9, 85.5, 53.6, 43.4. **IR (ATR) ν (cm<sup>-1</sup>):** 2946, 2082, 1737, 1231, 1138, 756. **HRMS (ESI) m/z:** calcd. for C<sub>19</sub>H<sub>16</sub>ClN<sub>3</sub>O<sub>2</sub>Na [M+Na]<sup>+</sup> 376.0823; Found 376.0826.

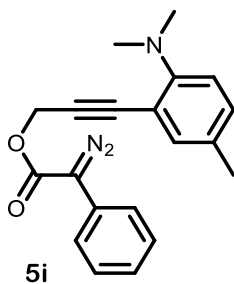

Diazo compound **5i** was obtained from **S2i** (0.21 g, 0.68 mmol) as an orange oil (0.20 g, 88%) following the same procedure as for **5a**.

**MW (C<sub>20</sub>H<sub>19</sub>N<sub>3</sub>O<sub>2</sub>):** 333.39 g/mol; **Rf:** 0.73 (Hexanes/EtOAc 8:2); **<sup>1</sup>H NMR (CDCl<sub>3</sub>, 400 MHz):** δ<sub>H</sub> 7.53 – 7.47 (m, 2H), 7.43 – 7.35 (m, 2H), 7.25 (d, *J* = 2.3 Hz, 1H), 7.23 – 7.17 (m, 1H), 7.07 (dd, *J* = 8.3, 1.8 Hz, 1H), 6.83 (d, *J* = 8.3 Hz, 1H), 5.16 (s, 2H), 2.88 (s, 6H), 2.25 (s, 3H). **<sup>13</sup>C{H} NMR (CDCl<sub>3</sub>, 101 MHz):** δ<sub>C</sub> 164.6, 153.2, 135.0, 130.7, 130.3, 129.1, 126.1, 125.4, 124.2, 117.2, 114.4, 87.9, 86.3, 53.8, 44.0, 20.3. **IR (ATR) ν (cm<sup>-1</sup>):** 2938, 2081, 1699, 1238, 1141, 753. **HRMS (ESI) m/z:** calcd. for C<sub>20</sub>H<sub>19</sub>N<sub>3</sub>O<sub>2</sub>Na [M+Na]<sup>+</sup> 356.1369; Found 356.1373.

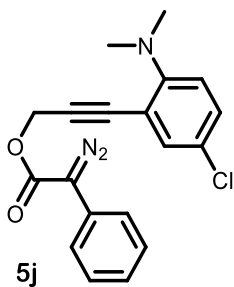

Diazo compound **5j** was obtained from **S2j** (0.17 g, 0.52 mmol) as an orange oil (0.16 g, 87%) following the same procedure as for **5a**.

**MW (C<sub>19</sub>H<sub>16</sub>ClN<sub>3</sub>O<sub>2</sub>):** 353.81 g/mol; **Rf:** 0.70 (Hexanes/EtOAc 8:2); **<sup>1</sup>H NMR (CDCl<sub>3</sub>, 400 MHz):** δ<sub>H</sub> 7.54 – 7.46 (m, 2H), 7.44 – 7.36 (m, 3H), 7.24 – 7.15 (m, 2H), 6.81 (d, *J* = 8.8 Hz, 1H), 5.15 (s, 2H), 2.91 (s, 6H). **<sup>13</sup>C{<sup>1</sup>H} NMR (CDCl<sub>3</sub>, 101 MHz):** δ<sub>C</sub> 164.5, 153.9, 134.0, 129.8, 129.1, 126.2, 125.3, 125.2, 124.2, 118.3, 115.4, 89.2, 85.0, 53.5, 43.6. **IR (ATR) ν (cm<sup>-1</sup>):** 2940, 2081, 1698, 1236, 1139, 751. **HRMS (ESI) m/z:** calcd. for C<sub>19</sub>H<sub>16</sub>ClN<sub>3</sub>O<sub>2</sub>Na [M+Na]<sup>+</sup> 376.0823; Found 376.0830.

## S6. Preparation of **5a-d<sub>6</sub>**

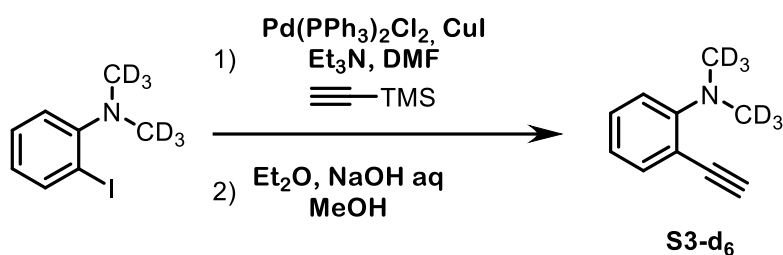

In a 50 mL round-bottom flask containing a mixture of ***N,N*-Dimethyl-*d*<sub>3</sub>-2-iodoaniline** <sup>[6]</sup> (1.23 g, 4.86 mmol), CuI (37.1 mg, 0.20 mmol), Pd(PPh<sub>3</sub>)<sub>2</sub>Cl<sub>2</sub> (68.2 mg, 0.10 mmol.), and triethylamine (0.68 mL, 4.88 mmol.) in DMF (12 mL), trimethylsilylacetylene (0.81 mL, 5.86 mmol) was added dropwise under a nitrogen atmosphere. After the addition, the solution was stirred at room temperature overnight. Upon completion of the reaction (TLC monitoring), the crude was diluted with Et<sub>2</sub>O, and washed with saturated aqueous NH<sub>4</sub>Cl and brine. The organic layer was dried over anhydrous Na<sub>2</sub>SO<sub>4</sub> and concentrated under reduced pressure. The crude was then dissolved with methanol (19 mL) and Et<sub>2</sub>O (19 mL) and a 10% aqueous NaOH solution (11 mL) was added and the mixture was stirred at room temperature overnight. Upon completion of the reaction (TLC monitoring), the organic layer was separated, and the aqueous layer was back-extracted with Et<sub>2</sub>O twice. The combined organic extracts were washed with brine, dried over anhydrous Na<sub>2</sub>SO<sub>4</sub> and concentrated under reduced pressure. The crude product was purified by column chromatography on silica gel (Hexanes 100%) to afford **S3-d<sub>6</sub>** as a yellow oil (0.52 g, 71 % yield).

**MW (C<sub>10</sub>H<sub>5</sub>D<sub>6</sub>N):** 151.24 g/mol; **Rf:** 0.50 (Hexanes/EtOAc 8:2); **<sup>1</sup>H NMR (CDCl<sub>3</sub>, 400 MHz):** δ<sub>H</sub> 7.46 (dd, *J* = 7.6, 1.7 Hz, 1H), 7.27 (ddd, *J* = 8.3, 7.3, 1.7 Hz (overlapped with chloroform), 1H), 6.92 (dd, *J* = 8.3, 1.1 Hz, 1H), 6.88 (td, *J* = 7.6, 1.1 Hz, 1H), 3.41 (s, 1H). **<sup>13</sup>C{<sup>1</sup>H} NMR (CDCl<sub>3</sub>, 101 MHz):** δ<sub>C</sub> 135.0, 129.7, 120.7, 117.1, 114.4, 83.0, 82.3 (carbons bonded to deuterium are not observed in the spectrum with the standard acquisition parameters). **IR (ATR) ν (cm<sup>-1</sup>):** 3280, 2046, 1482, 749. **HRMS (ESI) m/z:** calcd. for C<sub>10</sub>H<sub>6</sub>D<sub>6</sub>N [M+H]<sup>+</sup> 152.1341; Found 152.1348.

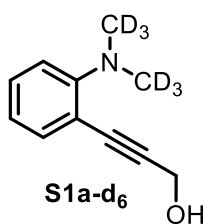

Propargyl alcohol **S1a-d<sub>6</sub>** was obtained from **S3** (0.52 g, 3.44 mmol) as a brown oil (0.51 g, 82%) following the same procedure as for **S1a**.

**MW (C<sub>11</sub>H<sub>7</sub>D<sub>6</sub>NO):** 181.27 g/mol; **Rf:** 0.25 (Hexanes/EtOAc 7:3); **<sup>1</sup>H NMR (CDCl<sub>3</sub>, 400 MHz):** δ<sub>H</sub> 7.38 (dd, *J* = 7.6, 1.7 Hz, 1H), 7.27 – 7.22 (m, 1H, (overlapped with chloroform)), 6.93 (d, *J* = 1.1 Hz, 1H), 6.92 (dd, *J* = 8.2, 1.1 Hz, 1H), 4.55 (s, 2H), 2.21 (broad s, 1H). **<sup>13</sup>C{H} NMR (CDCl<sub>3</sub>, 101 MHz):** δ<sub>C</sub> 155.1, 134.5, 129.6, 121.0, 117.2, 115.1, 92.7, 84.9, 52.0 (carbons bonded to deuterium are not observed in the spectrum with the standard acquisition parameters). **IR (ATR) ν (cm<sup>-1</sup>):** 3290, 2918, 1590, 1483, 1021, 752. **HRMS (ESI)m/z:** calcd. for C<sub>11</sub>H<sub>8</sub>D<sub>6</sub>NO [M+H]<sup>+</sup> 182.1447; Found 182.1456.

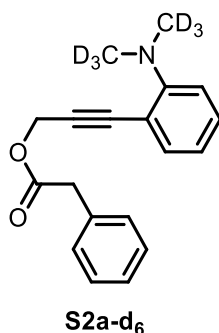

Ester **S2a-d<sub>6</sub>** was obtained from **S1a-d<sub>6</sub>** (0.39 g, 2.15 mmol) as an orange oil (0.57 g, 88%) following the same procedure as for **S2a**.

**MW (C<sub>19</sub>H<sub>13</sub>D<sub>6</sub>NO<sub>2</sub>):** 299.40 g/mol; **Rf:** 0.55 (Hexanes/EtOAc 8:2); **<sup>1</sup>H NMR (CDCl<sub>3</sub>, 400 MHz):** δ<sub>H</sub> 7.39 (dd, *J* = 7.6, 1.7 Hz, 1H), 7.34 – 7.26 (m, 6H), 7.25 – 7.23 (m, 1H), 6.91 – 6.82 (m, 2H), 4.99 (s, 2H), 3.70 (s, 2H). **<sup>13</sup>C{H} NMR (CDCl<sub>3</sub>, 101 MHz):** δ<sub>C</sub> 171.0, 155.3, 134.8, 133.8, 129.8, 129.4, 128.7, 127.3, 120.5, 117.0, 114.1, 88.1, 86.1, 53.8, 41.3 (carbons bonded to deuterium are not observed in the spectrum with the standard acquisition parameters). **IR (ATR) ν (cm<sup>-1</sup>):** 2918, 1736, 1485, 1131, 751. **HRMS (ESI)m/z:** calcd. for C<sub>19</sub>H<sub>13</sub>D<sub>6</sub>NO<sub>2</sub>Na [M+Na]<sup>+</sup> 322.1685; Found 322.1691.

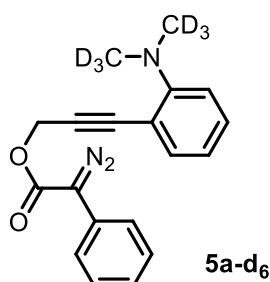

Diazo **5a-d<sub>6</sub>** was obtained from **S2a-d<sub>6</sub>** (0.32 g, 1.07 mmol) as an orange solid (0.26 g, 75%) following the same procedure as for **5a**.

**MW (C<sub>19</sub>H<sub>11</sub>D<sub>6</sub>N<sub>3</sub>O<sub>2</sub>):** 325.40 g/mol; **Rf:** 0.58 (Hexanes/EtOAc 8:2); **<sup>1</sup>H NMR (CDCl<sub>3</sub>, 400 MHz):** δ<sub>H</sub> 7.54 – 7.45 (m, 2H), 7.45 – 7.34 (m, 3H), 7.31 – 7.23 (m, 2H, (overlapped with chloroform)), 7.23 – 7.17 (m, 1H), 6.89 (dd, *J* = 8.0, 1.1 Hz, 1H), 6.86 (td, *J* = 8.0, 1.1 Hz, 1H), 5.17 (s, 2H). **<sup>13</sup>C{H} NMR (CDCl<sub>3</sub>, 101 MHz):** δ<sub>C</sub> 164.6, 155.3, 134.8, 129.9, 129.1, 126.1, 125.4, 124.2, 120.5, 117.0, 114.0, 88.1, 86.4, 53.7 (carbons bonded to deuterium are not observed in the spectrum with the standard acquisition parameters). **IR (ATR) ν (cm<sup>-1</sup>):** 2927, 2085, 1700, 1242, 1143, 748. **HRMS (ESI) m/z:** calcd. for C<sub>19</sub>H<sub>11</sub>D<sub>6</sub>N<sub>3</sub>O<sub>2</sub>Na [M+Na]<sup>+</sup> 348.1590; Found 348.1589.

## S7. Silver catalyzed carbene/alkyne metathesis tandem reaction.

### S7.1. NMR Characterization of compound 4

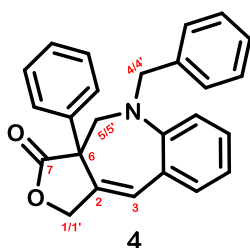

**MW (C<sub>25</sub>H<sub>21</sub>NO<sub>2</sub>):** 367.15 g/mol; **Rf:** 0.53 (Hexanes/EtOAc 8:2); **<sup>1</sup>H NMR (CDCl<sub>3</sub>, 400 MHz):** δ<sub>H</sub> 7.50 – 7.43 (m, 2H, **H<sub>Ph</sub>**), 7.38 – 7.19 (m, 7H, **H<sub>Ph</sub>** (overlapped with chloroform)), 7.10 – 7.04 (m, 1H, **H<sub>Ph</sub>**), 6.97 (d, *J* = 7.0 Hz, 2H, **H<sub>Ph</sub>**), 6.86 (s, 1H, **H<sub>3</sub>**), 6.83 (d, *J* = 7.0 Hz, 1H, **H<sub>Ph</sub>**), 6.66 (d, *J* = 8.3 Hz, 1H, **H<sub>Ph</sub>**), 4.93 (dd, *J* = 11.8, 1.8 Hz, 1H, **H<sub>1/1'</sub>**), 4.84 (d, *J* = 11.8 Hz, 1H, **H<sub>1/1'</sub>**), 4.25 (d, *J* = 18.1 Hz, 1H, **H<sub>4/4'</sub>**), 4.16 (d, *J* = 13.8 Hz, 1H, **H<sub>5/5'</sub>**), 3.40 (d, *J* = 18.1 Hz, 1H, **H<sub>4/4'</sub>**), 3.34 (dd, *J* = 13.8, 1.6 Hz, 1H, **H<sub>5/5'</sub>**). **<sup>13</sup>C{H} NMR (CDCl<sub>3</sub>, 101 MHz):** δ<sub>C</sub> 175.6 (**C<sub>7</sub>**), 148.9 (**C<sub>Ph</sub>**), 138.3 (**C<sub>Ph</sub>**), 136.0 (**C<sub>Ph</sub>**), 134.9 (**C<sub>Ph</sub>**), 133.7 (**C<sub>2</sub>**), 129.5 (**C<sub>3</sub>**), 129.2 (**C<sub>Ph</sub>**), 128.8 (**C<sub>Ph</sub>**), 128.4 (**C<sub>Ph</sub>**), 127.7 (**C<sub>Ph</sub>**), 127.1 (**C<sub>Ph</sub>**), 126.2 (**C<sub>Ph</sub>**), 120.9 (**C<sub>Ph</sub>**), 118.7 (**C<sub>Ph</sub>**), 116.7 (**C<sub>Ph</sub>**), 71.0 (**C<sub>1</sub>**), 58.6 (**C<sub>4</sub>**), 58.4 (**C<sub>6</sub>**), 57.0 (**C<sub>5</sub>**).

## S7.2. Optimization of silver catalyzed carbene/alkyne metathesis tandem reaction<sup>a</sup>

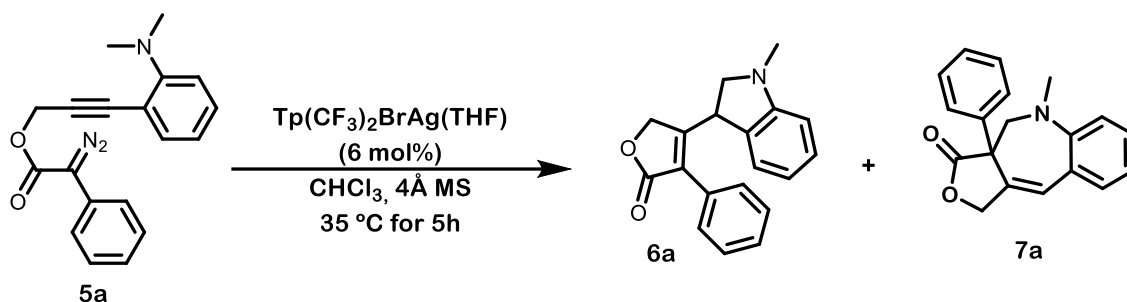

| Entry | Deviation from standard conditions <sup>b</sup>                                                        | Yield (%)<br>( <b>6a</b> / <b>7a</b> ) |
|-------|--------------------------------------------------------------------------------------------------------|----------------------------------------|
| 1     | none                                                                                                   | 81 (10 / 71)                           |
| 2     | $\text{CH}_2\text{Cl}_2$ as solvent                                                                    | 90 (19 / 71)                           |
| 3     | MS beads <sup>b</sup> instead of powdered MS                                                           | 84 (19 / 65)                           |
| 4     | 45°C                                                                                                   | 72 (13 / 59)                           |
| 5     | RT                                                                                                     | 67 (10 / 57)                           |
| 6     | $\text{CH}_2\text{Cl}_2$ as solvent at RT                                                              | 57 (12 / 45)                           |
| 7     | DCE as solvent at RT                                                                                   | 28 (5 / 23) <sup>c,e</sup>             |
| 8     | Chlorobenzene as solvent at RT                                                                         | 44 (13 / 41) <sup>d,e</sup>            |
| 9     | Dichlorobenzene as solvent at RT                                                                       | 36 (10 / 26) <sup>e</sup>              |
| 10    | 1,2-DCP as solvent at RT for 17h                                                                       | NR <sup>e</sup>                        |
| 11    | $[\text{TpBr}_3\text{Ag}]_2$ as catalyst and $\text{CH}_2\text{Cl}_2$ as solvent at RT                 | 69 (34 / 35)                           |
| 12    | $\text{Tp}^*\text{BrAg}(\text{THF})$ as catalyst and $\text{CH}_2\text{Cl}_2$ as solvent at RT for 24h | NR                                     |

<sup>a</sup> Standard conditions: Unless otherwise noted, reactions were carried out with 0.06 mmol of **5a** ( $[\text{5a}] = 3.8 \text{ mM}$ ), at room temperature in 16 mL of  $\text{CHCl}_3$  for 5h. The yields given are isolated yields. <sup>b</sup> All of the reactions in Table were carried out with 4 Å MS beads except for those shown in entry 1 and 2 that were carried out with powdered 4 Å MS. <sup>c</sup> 26% starting material was recovered. <sup>d</sup> 14% starting material was recovered. <sup>e</sup> Yields and product ratios were determined by NMR using 1,3,5-trimethoxybenzene as internal standard. RT, room temperature; NR, no reaction.

### S7.3. General procedure for the silver catalyzed carbene/alkyne metathesis

#### tandem reaction

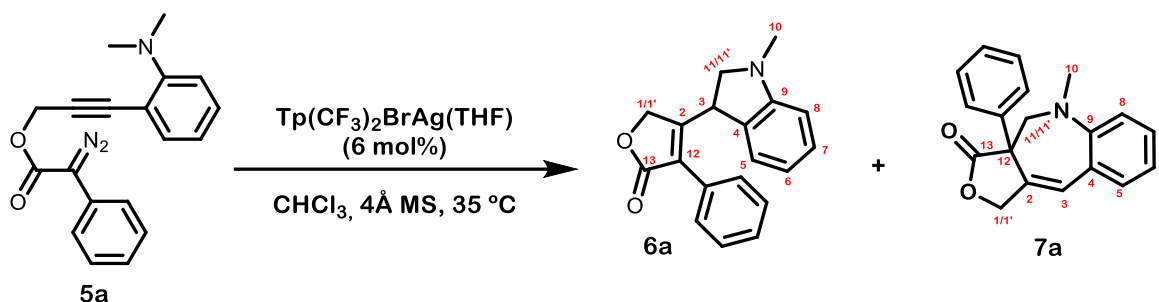

To an oven-dried Schlenk flask containing diazo compound **5a** (18.5 mg, 0.0580 mmol) and 4 Å MS (100 mg) in anhydrous chloroform (14.4 mL), a solution of  $\text{Tp}(\text{CF}_3)_2\text{BrAg}(\text{THF})$  (3.6 mg, 0.0035 mmol) in chloroform (0.6 mL) was added dropwise under a nitrogen atmosphere. The mixture was then heated to 35°C and stirred in the dark for 5h. The solvent was then removed under reduced pressure and the crude reaction mixture was purified by column chromatography on silica gel using hexane/EtOAc mixtures as the eluent (96:4 to 75:25). Concentration under reduced pressure afforded compound **7a** (12.0 mg, 71% yield) as a colorless solid, and **6a** (1.7 mg, 10% yield) as a colorless solid.

A mmol scale reaction was carried using the following amounts of materials: diazo compound **5a** (320.5 mg, 1.00 mmol), 4 Å MS (1000 mg), anhydrous chloroform (251 mL + 3 mL (for the catalyst addition)) and  $\text{Tp}(\text{CF}_3)_2\text{BrAg}(\text{THF})$  (62.2 mg, 0.06 mmol) affording compound **7a** (166.7 mg, 57% yield), and **6a** (28.4 mg, 10 % yield).

**7a**: MW ( $\text{C}_{19}\text{H}_{17}\text{NO}_2$ ): 291.35 g/mol; Rf: 0.53 (Hexanes/EtOAc 8:2). MP (°C): 165.  $^1\text{H NMR}$  ( $\text{CDCl}_3$ , 400 MHz):  $\delta_{\text{H}}$  7.47 – 7.40 (m, 2H,  $\text{H}_{\text{Ph}}$ ), 7.34 – 7.27 (m, 3H,  $\text{H}_{\text{Ph}}$ ), 7.26 (m, 1H, **H5** (overlapped with chloroform)), 7.20 (ddd,  $J = 8.6, 7.4, 1.7$  Hz, 1H, **H7**), 6.84 (td,  $J = 7.4, 1.1$  Hz, 1H, **H6**), 6.80 (broad s, 1H, **H3**), 6.73 (d,  $J = 7.5$  Hz, 1H, **H8**), 4.91 (dd,  $J = 11.3, 1.9$  Hz, 1H, **H1/1'**), 4.80 (dd,  $J = 11.3, 1.0$  Hz, 1H, **H1/1'**), 3.98 (d,  $J = 13.5$  Hz, 1H, **H11/11'**), 3.17 (d,  $J = 13.5$  Hz, 1H, **H11/11'**), 2.52 (s, 3H, **H10**).  $^{13}\text{C}\{\text{H}\}$  NMR ( $\text{CDCl}_3$ , 101 MHz):  $\delta_{\text{C}}$  175.7 (**C13**), 149.1(**C9**), 136.7 ( $\text{C}_{\text{Ph}}$ ), 134.8 (**C5**), 133.5 (**C2**), 129.5 (**C3**), 129.0 (**C7**), 128.6 ( $\text{C}_{\text{Ph}}$ ), 128.1 ( $\text{C}_{\text{Ph}}$ ), 127.5 ( $\text{C}_{\text{Ph}}$ ), 121.1 (**C4**), 118.3 (**C6**), 115.2 (**C8**), 71.1 (**C1**), 59.1 (**C11**), 58.3 (**C12**), 42.3 (**C10**). IR (ATR)  $\nu$  ( $\text{cm}^{-1}$ ): 3016, 2858, 1753, 1491, 756. HRMS (ESI)  $m/z$ : calcd. for  $\text{C}_{19}\text{H}_{17}\text{NO}_2\text{Na}$  [ $\text{M}+\text{Na}$ ] $^+$  314.1151; Found 314.1149.

**6a**: MW ( $\text{C}_{19}\text{H}_{17}\text{NO}_2$ ): 291.35 g/mol; Rf: 0.27 (Hexanes/EtOAc 8:2). MP (°C): 139.  $^1\text{H NMR}$  ( $\text{CDCl}_3$ , 400 MHz):  $\delta_{\text{H}}$  7.56 – 7.39 (m, 5H,  $\text{H}_{\text{Ph}}$ ), 7.18 (t,  $J = 7.9$  Hz, 1H, **H7**), 7.00 (d,  $J = 7.5$  Hz, 1H, **H5**), 6.73 (td,  $J = 7.5, 1.0$  Hz, 1H, **H6**), 6.57 (d,  $J = 7.9$  Hz, 1H, **H8**), 4.88 (d,  $J = 17.8$ , 1H, **H1/1'**), 4.70 (dd,  $J = 8.8, 6.2$  Hz, 1H, **H3**), 4.63 (d,  $J = 17.9$  Hz, 1H, **H1/1'**), 3.58 (t,  $J = 8.8$  Hz, 1H, **H11/11'**), 3.30 (dd,  $J = 8.8, 6.2$  Hz, 1H, **H11/11'**), 2.79 (s, 3H, **H10**).  $^{13}\text{C}\{\text{H}\}$  NMR ( $\text{CDCl}_3$ , 101 MHz):  $\delta_{\text{C}}$  173.3 (**C13**), 161.7 (**C2**), 153.1 (**C9**), 129.8 (**C4**), 129.3 (**C7**), 129.2 ( $\text{C}_{\text{Ph}}$ ), 129.1 ( $\text{C}_{\text{Ph}}$ ),



129.0 (**C<sub>Ph</sub>**), 128.9 (**C<sub>Ph</sub>**), 127.7 (**C12**), 124.4 (**C5**), 118.9 (**C6**), 108.3 (**C8**), 69.5 (**C1**), 61.4 (**C11**), 39.9 (**C3**), 36.0 (**C10**). IR (ATR)  $\nu$  (cm<sup>-1</sup>): 2918, 2853, 1742, 1127, 736. HRMS (ESI)  $m/z$ : calcd. for C<sub>19</sub>H<sub>17</sub>NO<sub>2</sub>Na [M+Na]<sup>+</sup> 314.1151; Found 314.1157.

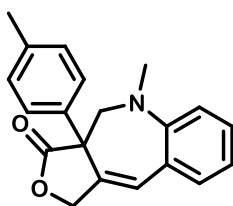

7b

Starting from diazo compound **5b** (33.7 mg, 0.10 mmol), compound **7b** was obtained as a yellow oil (17.7 mg, 57 % yield), alongside **6b** (6.7 mg, 22% yield).

**MW (C<sub>20</sub>H<sub>19</sub>NO<sub>2</sub>):** 305.38 g/mol; **Rf:** 0.48 (Hexanes/EtOAc 8:2); **<sup>1</sup>H NMR (CDCl<sub>3</sub>, 400 MHz):**  $\delta_{\text{H}}$  7.31 (d,  $J$  = 8.4 Hz, 2H), 7.26-7.24 (m, 1H (overlapped with chloroform)), 7.19 (ddd,  $J$  = 8.8, 7.3, 1.7 Hz, 1H), 7.11 (d,  $J$  = 8.4 Hz, 2H), 6.83 (td,  $J$  = 7.3, 1.1 Hz, 1H), 6.77 (broad s, 1H), 6.73 (d,  $J$  = 8.8 Hz, 1H), 4.90 (dd,  $J$  = 11.3, 1.9 Hz, 1H), 4.78 (dd,  $J$  = 11.3, 1.1 Hz, 1H), 3.96 (d,  $J$  = 13.5 Hz, 1H), 3.15 (d,  $J$  = 13.5 Hz, 1H), 2.55 (s, 3H), 2.32 (s, 3H). **<sup>13</sup>C{<sup>1</sup>H} NMR (CDCl<sub>3</sub>, 101 MHz):**  $\delta_{\text{C}}$  175.8, 149.2, 137.9, 134.7, 133.8, 133.7, 129.3, 129.2, 129.0, 127.4, 121.2, 118.2, 115.1, 71.1, 59.0, 58.0, 42.4, 21.2. IR (ATR)  $\nu$  (cm<sup>-1</sup>): 3018, 2876, 1758, 1494, 745. HRMS (ESI)  $m/z$ : calcd. for C<sub>20</sub>H<sub>19</sub>NO<sub>2</sub>Na [M+Na]<sup>+</sup> 328.1308; Found 328.1313.

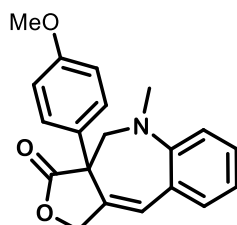

7c

Starting from diazo compound **5c** (35.1 mg, 0.10 mmol), compound **7c** was obtained as a yellow oil (13.5 mg, 42 % yield), alongside **6c** (8.9 mg, 28% yield).

**MW (C<sub>20</sub>H<sub>19</sub>NO<sub>3</sub>):** 321.38 g/mol; **Rf:** 0.38 (Hexanes/EtOAc 8:2); **<sup>1</sup>H NMR (400 MHz, CDCl<sub>3</sub>)  $\delta$  (ppm):** 7.37 – 7.31 (m, 2H), 7.28 – 7.24 (m, 1H (overlapped with chloroform)), 7.20 (ddd,  $J$  = 8.6, 7.2, 1.7 Hz, 1H), 6.86 – 6.80 (m, 3H), 6.76 (broad s, 1H), 6.74 (d,  $J$  = 8.6 Hz, 1H), 4.90 (dd,  $J$  = 11.3, 1.9 Hz, 1H), 4.78 (d,  $J$  = 11.3 Hz, 1H), 3.92 (d,  $J$  = 13.5 Hz, 1H), 3.78 (s, 3H), 3.14 (d,  $J$  = 13.5 Hz, 1H), 2.56 (s, 3H). **<sup>13</sup>C{<sup>1</sup>H} NMR (CDCl<sub>3</sub>, 101 MHz):**  $\delta_{\text{C}}$  175.9, 159.5, 149.2, 134.7, 133.9, 129.1, 129.0, 128.8, 128.7, 121.2, 118.2, 115.2, 113.9, 71.1, 59.0, 57.6, 55.4, 42.4. IR (ATR)  $\nu$  (cm<sup>-1</sup>): 3060, 2849, 1756, 1494, 746. HRMS (ESI)  $m/z$ : calcd. for C<sub>20</sub>H<sub>19</sub>NO<sub>3</sub>Na [M+Na]<sup>+</sup> 344.1257; Found 344.1260.

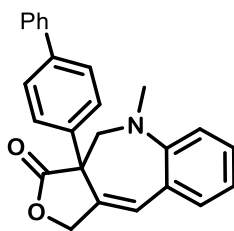

7d

Starting from diazo compound **5d** (23.8 mg, 0.060 mmol), compound **7d** was obtained as a colorless solid (9.3 mg, 42 % yield), alongside **6d** (7.4 mg, 33% yield).

**MW (C<sub>25</sub>H<sub>21</sub>NO<sub>2</sub>):** 367.45 g/mol; **Rf:** 0.53 (Hexanes/EtOAc 8:2); **MP (°C):** 99; **<sup>1</sup>H NMR (CDCl<sub>3</sub>, 400 MHz):** δ<sub>H</sub> 7.60 – 7.48 (m, 6H), 7.47 – 7.40 (m, 2H), 7.38 – 7.32 (m, 1H), 7.29 (dd, *J* = 7.6, 1.7 Hz, 1H), 7.21 (ddd, *J* = 8.4, 7.6, 1.7 Hz, 1H), 6.85 (td, *J* = 7.6, 1.1 Hz, 1H), 6.82 (broad s, 1H), 6.75 (d, *J* = 8.4 Hz, 1H), 4.95 (dd, *J* = 11.4, 1.9 Hz, 1H), 4.83 (d, *J* = 11.4 Hz, 1H), 4.03 (d, *J* = 13.6 Hz, 1H), 3.20 (d, *J* = 13.6 Hz, 1H), 2.59 (s, 3H). **<sup>13</sup>C{<sup>1</sup>H} NMR (CDCl<sub>3</sub>, 101 MHz):** δ<sub>C</sub> 175.7, 149.1, 140.9, 140.4, 135.8, 134.8, 133.5, 129.5, 129.1, 129.0, 128.0, 127.7, 127.2, 127.1, 121.2, 118.3, 115.2, 71.2, 59.0, 58.1, 42.5. **IR (ATR) ν (cm<sup>-1</sup>):** 3027, 2875, 1721, 1493, 746. **HRMS (ESI) m/z:** calcd. for C<sub>25</sub>H<sub>21</sub>NO<sub>2</sub>Na [M+Na]<sup>+</sup> 390.1465; Found 390.1477.

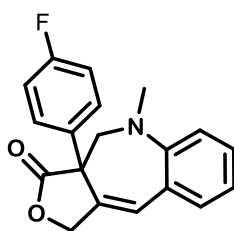

7e

Starting from diazo compound **5e** (38.0 mg, 0.11 mmol), compound **7e** was obtained as a colorless solid (10.5 mg, 31 % yield), alongside **6e** (11.5 mg, 34 % yield).

**MW (C<sub>19</sub>H<sub>16</sub>FNO<sub>2</sub>):** 309.34 g/mol; **Rf:** 0.58 (Hexanes/EtOAc 8:2); **MP (°C):** 126; **<sup>1</sup>H NMR (CDCl<sub>3</sub>, 400 MHz):** δ<sub>H</sub> 7.46 – 7.37 (m, 2H), 7.29 – 7.25 (m, 1H, (overlapped with chloroform)), 7.21 (ddd, *J* = 8.4, 7.3, 1.7 Hz, 1H), 7.05 – 6.95 (m, 2H), 6.85 (td, *J* = 7.3, 1.2 Hz, 1H), 6.79 (broad s, 1H), 6.74 (d, *J* = 8.4 Hz, 1H), 4.89 (dd, *J* = 11.4, 1.9 Hz, 1H), 4.81 (d, *J* = 11.4 Hz, 1H), 3.93 (d, *J* = 13.6 Hz, 1H), 3.16 (d, *J* = 13.6 Hz, 1H), 2.55 (s, 3H). **<sup>13</sup>C{<sup>1</sup>H} NMR (CDCl<sub>3</sub>, 101 MHz):** δ<sub>C</sub> 175.6, 162.7 (d, <sup>1</sup>*J*<sub>C-F</sub> = 248.4 Hz), 149.0, 134.9, 133.3, 132.5 (d, <sup>4</sup>*J*<sub>C-F</sub> = 3.2 Hz), 129.6, 129.3, 129.2 (d, <sup>3</sup>*J*<sub>C-F</sub> = 6.2 Hz), 121.0, 118.5, 115.6, 115.3 (d, <sup>2</sup>*J*<sub>C-F</sub> = 23.4 Hz), 71.1, 59.0, 57.8, 42.4. **<sup>19</sup>F NMR (CDCl<sub>3</sub>, 376 MHz):** δ<sub>F</sub> -115.16. (s, 1F). **IR (ATR) ν (cm<sup>-1</sup>):** 3014, 2851, 1749, 1491, 759. **HRMS (ESI) m/z:** calcd. for C<sub>19</sub>H<sub>16</sub>FNO<sub>2</sub>Na [M+Na]<sup>+</sup> 332.1057; Found 332.1069.

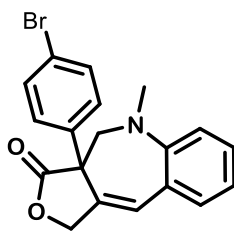

7f

The reaction was run at 55°C for 24h instead of 35°C for 5h. Starting from diazo compound **5f** (23.2 mg, 0.058 mmol), compound **7f** was obtained as a colorless solid (5.0 mg, 24 % yield), alongside **6f** (8.1 mg, 38 % yield).

**MW (C<sub>19</sub>H<sub>16</sub>BrNO<sub>2</sub>):** 370.25 g/mol; **Rf:** 0.61 (Hexanes/EtOAc 8:2); **MP (°C):** 77; **<sup>1</sup>H NMR (CDCl<sub>3</sub>, 400 MHz):** δ<sub>H</sub> 7.48 – 7.40 (m, 2H), 7.35 – 7.29 (m, 2H), 7.28 – 7.25 (m, 1H, (overlapped with chloroform)), 7.21 (ddd, *J* = 8.5, 7.3, 1.7 Hz, 1H), 6.85 (td, *J* = 7.3, 1.2 Hz, 1H), 6.80 (s, 1H), 6.75 (d, *J* = 8.5 Hz, 1H), 4.88 (dd, *J* = 11.4, 1.9 Hz, 1H), 4.80 (d, *J* = 11.4 Hz, 1H), 3.94 (d, *J* = 13.6 Hz, 1H), 3.16 (d, *J* = 13.6 Hz, 1H), 2.57 (s, 3H). **<sup>13</sup>C{<sup>1</sup>H} NMR (CDCl<sub>3</sub>, 101 MHz):** δ<sub>C</sub> 175.3, 149.0, 135.9, 134.9, 132.8, 131.8, 129.9, 129.3, 129.3, 122.5, 121.0, 118.5, 115.2, 71.1, 59.0, 58.0, 42.6. **IR (ATR) ν (cm<sup>-1</sup>):** 3066, 2880, 1764, 1481, 1003, 753. **HRMS (ESI) m/z:** calcd. for C<sub>19</sub>H<sub>16</sub>BrNO<sub>2</sub>Na [M+Na]<sup>+</sup> 392.0257-394.0237; Found 392.0244-394.0233.

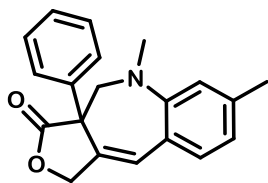

7g

Starting from diazo compound **5g** (19.2 mg, 0.058 mmol), compound **7g** was obtained as a colorless solid (10.6, 60% yield), alongside **6g** (1.2 mg, 7 % yield).

**MW (C<sub>20</sub>H<sub>19</sub>NO<sub>2</sub>):** 305.38 g/mol; **Rf:** 0.55 (Hexanes/EtOAc 8:2); **MP (°C):** 110; **<sup>1</sup>H NMR (CDCl<sub>3</sub>, 400 MHz):** δ<sub>H</sub> 7.46 – 7.41 (m, 2H), 7.34 – 7.27 (m, 3H), 7.16 (d, *J* = 7.8 Hz, 1H), 6.77 (s, 1H), 6.66 (dd, *J* = 7.8, 1.6 Hz, 1H), 6.53 (s, 1H), 4.89 (dd, *J* = 11.2, 1.9 Hz, 1H), 4.78 (d, *J* = 11.2 Hz, 1H), 3.96 (d, *J* = 13.5 Hz, 1H), 3.17 (d, *J* = 13.5 Hz, 1H), 2.51 (s, 3H), 2.32 (s, 3H). **<sup>13</sup>C{<sup>1</sup>H} NMR (CDCl<sub>3</sub>, 101 MHz):** δ<sub>C</sub> 175.8, 149.0, 139.2, 136.8, 134.8, 132.3, 129.2, 128.1, 127.6, 119.4, 118.7, 115.7, 71.2, 59.1, 58.3, 42.3, 21.7. **IR (ATR) ν (cm<sup>-1</sup>):** 3024, 2848, 1757, 1341, 770. **HRMS (ESI) m/z:** calcd. for C<sub>20</sub>H<sub>19</sub>NO<sub>2</sub>Na [M+Na]<sup>+</sup> 328.1308; Found 328.1312.

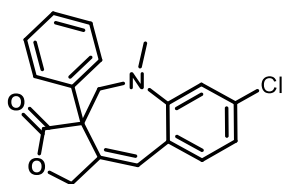

7h

Starting from diazo compound **5h** (21.0 mg, 0.59 mmol), compound **7h** was obtained as a colorless solid (13.4 mg, 69 % yield), alongside **6h** (2.3 mg, 12 % yield).

**MW (C<sub>19</sub>H<sub>16</sub>ClNO<sub>2</sub>):** 325.79 g/mol; **Rf:** 0.55 (Hexanes/EtOAc 8:2); **MP (°C):** 154; **<sup>1</sup>H NMR (CDCl<sub>3</sub>, 400 MHz):** δ<sub>H</sub> 7.44 – 7.36 (m, 2H), 7.35 – 7.28 (m, 3H), 7.17 (d, *J* = 8.3 Hz, 1H), 6.80 (dd, *J* = 8.3, 2.1 Hz, 1H), 6.75 (broad s, 1H), 6.68 (d, *J* = 2.1 Hz, 1H), 4.89 (dd, *J* = 11.4, 1.9 Hz, 1H), 4.79 (d, *J* = 11.4 Hz, 1H), 3.98 (d, *J* = 13.6 Hz, 1H), 3.17 (d, *J* = 13.6 Hz, 1H), 2.51 (s, 3H). **<sup>13</sup>C{<sup>1</sup>H} NMR (CDCl<sub>3</sub>, 101 MHz):** δ<sub>C</sub> 175.4, 149.8, 136.3, 134.9, 133.9, 128.8, 128.4, 128.3, 127.4, 119.7, 118.4, 115.1, 71.0, 59.1, 58.2, 42.5. **IR (ATR) ν (cm<sup>-1</sup>):** 3030, 2849, 1760, 1491, 702. **HRMS (ESI) m/z:** calcd. for C<sub>19</sub>H<sub>16</sub>ClNO<sub>2</sub>Na [M+Na]<sup>+</sup> 348.0762; Found 348.0769.

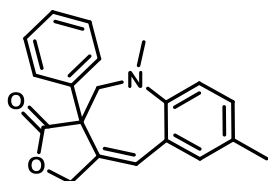

**7i**

Starting from diazo compound **5i** (19.5 mg, 0.059 mmol), compound **7i** was obtained as a colorless solid (11.8 mg, 66 % yield), alongside **6i** (1.7 mg, 10 % yield).

**MW (C<sub>20</sub>H<sub>19</sub>NO<sub>2</sub>):** 305.38 g/mol; **Rf:** 0.60 (Hexanes/EtOAc 8:2); **MP (°C):** 158; **<sup>1</sup>H NMR (CDCl<sub>3</sub>, 400 MHz):** δ<sub>H</sub> 7.47 – 7.40 (m, 2H), 7.34 – 7.27 (m, 3H), 7.07 (d, *J* = 2.2 Hz, 1H), 7.02 (dd, *J* = 8.5, 2.2 Hz, 1H), 6.75 (broad s, 1H), 6.65 (d, *J* = 8.5 Hz, 1H), 4.90 (dd, *J* = 11.4, 1.9 Hz, 1H), 4.78 (d, *J* = 11.4 Hz, 1H), 3.95 (d, *J* = 13.5 Hz, 1H), 3.14 (d, *J* = 13.5 Hz, 1H), 2.50 (s, 3H), 2.30 (s, 3H). **<sup>13</sup>C{<sup>1</sup>H} NMR (CDCl<sub>3</sub>, 101 MHz):** δ<sub>C</sub> 175.7, 147.0, 136.8, 135.0, 133.5, 129.9, 129.4, 128.6, 128.1, 127.5, 127.3, 121.0, 115.2, 71.2, 59.0, 58.4, 42.3, 20.2. **IR (ATR) ν (cm<sup>-1</sup>):** 3002, 2945, 1738, 1365, 1214. **HRMS (ESI) m/z:** calcd. for C<sub>20</sub>H<sub>19</sub>NO<sub>2</sub>Na [M+Na]<sup>+</sup> 328.1308; Found 328.1315.

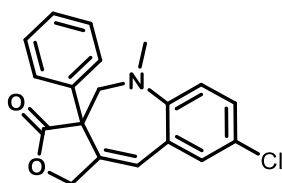

**7j**

Starting from diazo compound **5j** (20.3 mg, 0.057 mmol) compound **7j** was obtained as a colorless solid (10.9 mg, 60 % yield), alongside **6j** (2.0 mg, 11 % yield).

**MW (C<sub>19</sub>H<sub>16</sub>ClNO<sub>2</sub>):** 325.79 g/mol; **Rf:** 0.54 (Hexanes/EtOAc 8:2); **MP (°C):** 193; **<sup>1</sup>H NMR (CDCl<sub>3</sub>, 400 MHz):** δ<sub>H</sub> 7.44 – 7.35 (m, 2H), 7.35 – 7.28 (m, 3H), 7.23 (d, *J* = 2.5 Hz, 1H), 7.13 (dd, *J* = 8.9, 2.5 Hz, 1H), 6.70 (broad s, 1H), 6.64 (d, *J* = 8.9 Hz, 1H), 4.91 (dd, *J* = 11.5, 1.9 Hz, 1H), 4.80 (d, *J* = 11.5 Hz, 1H), 3.99 (d, *J* = 13.6 Hz, 1H), 3.13 (d, *J* = 13.6 Hz, 1H), 2.50 (s, 3H). **<sup>13</sup>C{<sup>1</sup>H} NMR (CDCl<sub>3</sub>, 101 MHz):** δ<sub>C</sub> 175.3, 147.6, 136.3, 135.2, 133.6, 128.7, 128.7, 128.3, 128.2, 127.4, 122.8,

122.3, 116.5, 70.9, 59.0, 58.3, 42.6. **IR (ATR)  $\nu$  (cm<sup>-1</sup>):** 3031, 2851, 1742, 1491, 695. **HRMS (ESI) m/z:** calcd. for C<sub>19</sub>H<sub>16</sub>ClNO<sub>2</sub>Na [M+Na]<sup>+</sup> 348.0762; Found 348.0765.

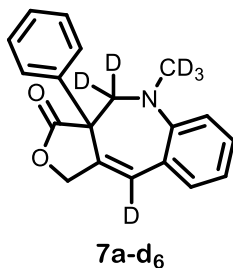

Starting from diazo compound **5a-d<sub>6</sub>** (19.2 mg, 0.059 mmol) compound **7j** was obtained as a colorless solid (10.6 mg, 60 % yield), alongside **6j** (1.5 mg, 9 % yield).

**MW (C<sub>19</sub>H<sub>11</sub>D<sub>6</sub>NO<sub>2</sub>):** 297.39 g/mol; **Rf:** 0.48 (Hexanes/EtOAc 8:2); **MP (°C):** 162; **<sup>1</sup>H NMR (CDCl<sub>3</sub>, 400 MHz):**  $\delta_{\text{H}}$  7.47 – 7.38 (m, 2H), 7.35 – 7.27 (m, 3H), 7.26 (m, 1H (overlapped with chloroform)), 7.20 (ddd,  $J = 8.6, 7.3, 1.7$  Hz, 1H), 6.83 (td,  $J = 7.3, 1.2$  Hz, 1H), 6.72 (dd,  $J = 8.4, 1.2$  Hz, 1H), 4.91 (d,  $J = 11.3$  Hz, 1H), 4.80 (d,  $J = 11.3$  Hz, 1H). **<sup>13</sup>C{<sup>1</sup>H} NMR (CDCl<sub>3</sub>, 101 MHz):**  $\delta_{\text{C}}$  175.7, 149.1, 136.7, 134.7, 133.3, 129.0, 128.6, 128.1, 127.5, 121.0, 118.2, 115.1, 71.1, 58.2 (carbons bonded to deuterium are not observed in the spectrum with the standard acquisition parameters). **IR (ATR)  $\nu$  (cm<sup>-1</sup>):** 2919, 1752, 1484, 697. **HRMS (ESI) m/z:** calcd. for C<sub>19</sub>H<sub>12</sub>D<sub>6</sub>NO<sub>2</sub> [M+H]<sup>+</sup> 298.1709; Found 298.1719.

## S8 Crystal structure of compound **7a** with probability level of 50 %

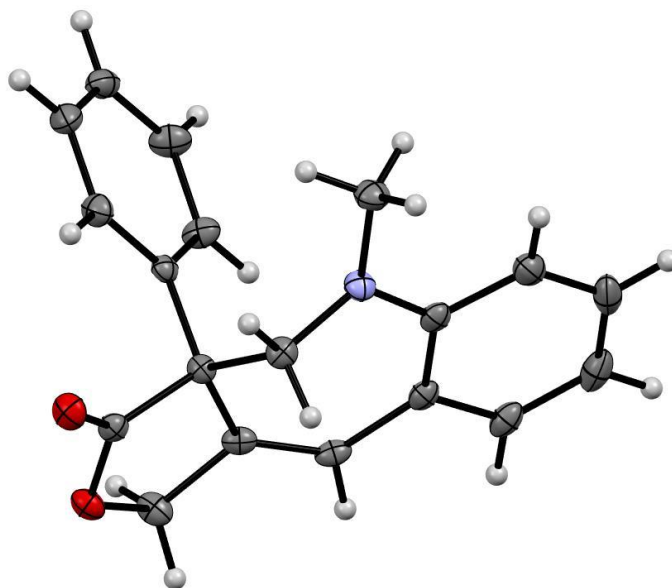

Colourless needle-like crystals of **7a** were grown at 2-6 °C upon slow diffusion of pentane into a solution of **7a** in chloroform.

A colorless prism-like specimen of C<sub>19</sub>H<sub>17</sub>NO<sub>2</sub>, approximate dimensions 0.140 mm x 0.260 mm x 0.800 mm, was used for the X-ray crystallographic analysis. The X-ray intensity data were measured on a D8 QUEST ECO three-circle diffractometer system equipped with a Ceramic x-ray tube (Mo K $\alpha$ ,  $\lambda$  = 0.71073 Å) and a doubly curved silicon crystal Bruker Triumph monochromator. A total of 1998 frames were collected. The total exposure time was 16.65 hours. The frames were integrated with the Bruker SAINT software package using a narrow-frame algorithm. The integration of the data using a monoclinic unit cell yielded a total of 56871 reflections to a maximum  $\theta$  angle of 27.52° (0.77 Å resolution), of which 3353 were independent (average redundancy 16.961, completeness = 99.7%, Rint = 4.32%, Rsig = 1.53%) and 3135 (93.50%) were greater than 2 $\sigma$ (F<sub>2</sub>). The final cell constants of a = 6.1270(2) Å, b = 22.8523(7) Å, c = 10.9205(3) Å,  $\beta$  = 106.0910(10)°, volume = 1469.14(8) Å<sup>3</sup>, are based upon the refinement of the XYZ-centroids of 9905 reflections above 20  $\sigma$ (I) with 6.61° < 2 $\theta$  < 54.90°. Data were corrected for absorption effects using the Multi-Scan method (SADABS). The ratio of minimum to maximum apparent transmission was 0.903. The calculated minimum and maximum transmission coefficients (based on crystal size) are 0.9350 and 0.9880.

The structure was solved and refined using the Bruker SHELXTL Software Package, using the space group P 1 21/c 1, with Z = 4 for the formula unit, C<sub>19</sub>H<sub>17</sub>NO<sub>2</sub>. The final anisotropic full-matrix least-squares refinement on F<sub>2</sub> with 267 variables converged at R1 = 5.40%, for the observed data and wR2 = 11.58% for all data. The goodness-of-fit was 1.261. The largest peak in the final difference electron density synthesis was 0.416 e-/Å<sup>3</sup> and the largest hole was -0.231 e-/Å<sup>3</sup> with an RMS deviation of 0.049 e-/Å<sup>3</sup>. On the basis of the final model, the calculated density was 1.317 g/cm<sup>3</sup> and F(000), 616 e-.

### Sample and crystal data for AD838

|                        |                                                                                                                              |
|------------------------|------------------------------------------------------------------------------------------------------------------------------|
| Identification code    | AD838                                                                                                                        |
| Chemical formula       | C <sub>19</sub> H <sub>17</sub> NO <sub>2</sub>                                                                              |
| Formula weight         | 291.33 g/mol                                                                                                                 |
| Temperature            | 100(2) K                                                                                                                     |
| Wavelength             | 0.71073 Å                                                                                                                    |
| Crystal size           | 0.140 x 0.260 x 0.800 mm                                                                                                     |
| Crystal habit          | colorless prism                                                                                                              |
| Crystal system         | monoclinic                                                                                                                   |
| Space group            | P 1 21/c 1                                                                                                                   |
| Unit cell dimensions   | a = 6.1270(2) Å $\alpha = 90^\circ$<br>b = 22.8523(7) Å $\beta = 106.0910(10)^\circ$<br>c = 10.9205(3) Å $\gamma = 90^\circ$ |
| Volume                 | 1469.14(8) Å <sup>3</sup>                                                                                                    |
| Z                      | 4                                                                                                                            |
| Density (calculated)   | 1.317 g/cm <sup>3</sup>                                                                                                      |
| Absorption coefficient | 0.085 mm <sup>-1</sup>                                                                                                       |
| F(000)                 | 616                                                                                                                          |

### Data collection and structure refinement for AD838

|                                     |                                                            |
|-------------------------------------|------------------------------------------------------------|
| Diffractometer                      | D8 QUEST ECO three-circle diffractometer                   |
| Radiation source                    | Ceramic x-ray tube (Mo K $\alpha$ , $\lambda = 0.71073$ Å) |
| Theta range for data collection     | 3.31 to 27.52°                                             |
| Index ranges                        | -7 <= h <= 7, -29 <= k <= 29, -14 <= l <= 14               |
| Reflections collected               | 56871                                                      |
| Independent reflections             | 3353 [R(int) = 0.0432]                                     |
| Coverage of independent reflections | 99.7%                                                      |
| Absorption correction               | Multi-Scan                                                 |
| Max. and min. transmission          | 0.9880 and 0.9350                                          |
| Structure solution technique        | direct methods                                             |
| Structure solution program          | SHELXT 2014/5 (Sheldrick, 2014)                            |
| Refinement method                   | Full-matrix least-squares on F <sup>2</sup>                |
| Refinement program                  | SHELXL-2017/1 (Sheldrick, 2017)                            |
| Function minimized                  | $\Sigma w(F_o^2 - F_c^2)^2$                                |
| Data / restraints / parameters      | 3353 / 0 / 267                                             |
| Goodness-of-fit on F <sup>2</sup>   | 1.261                                                      |

|                                    |                                                   |                           |
|------------------------------------|---------------------------------------------------|---------------------------|
| <b>Final R indices</b>             | 3135 data; $I > 2\sigma(I)$                       | R1 = 0.0540, wR2 = 0.1145 |
|                                    | all data                                          | R1 = 0.0574, wR2 = 0.1158 |
| <b>Weighting scheme</b>            | $w = 1/[\sigma^2(F_o^2) + (0.0148P)^2 + 1.6317P]$ |                           |
|                                    | where $P = (F_o^2 + 2F_c^2)/3$                    |                           |
| <b>Largest diff. peak and hole</b> | 0.416 and -0.231 eÅ <sup>-3</sup>                 |                           |
| <b>R.M.S. deviation from mean</b>  | 0.049 eÅ <sup>-3</sup>                            |                           |

**Atomic coordinates and equivalent isotropic atomic displacement parameters (Å<sup>2</sup>) for 7a**

U(eq) is defined as one third of the trace of the orthogonalized Uij tensor.

|     | <b>x/a</b> | <b>y/b</b> | <b>z/c</b>  | <b>U(eq)</b> |
|-----|------------|------------|-------------|--------------|
| O1  | 0.3528(2)  | 0.31854(6) | 0.99095(12) | 0.0188(3)    |
| O3  | 0.0529(2)  | 0.36260(6) | 0.02741(13) | 0.0212(3)    |
| C2  | 0.2524(3)  | 0.35138(7) | 0.06265(17) | 0.0155(3)    |
| C4  | 0.4232(3)  | 0.37001(7) | 0.18736(16) | 0.0138(3)    |
| C5  | 0.3256(3)  | 0.35748(8) | 0.30101(17) | 0.0162(3)    |
| N6  | 0.4652(3)  | 0.38190(7) | 0.41873(14) | 0.0174(3)    |
| C7  | 0.6650(3)  | 0.35509(7) | 0.48705(17) | 0.0167(3)    |
| C9  | 0.9395(3)  | 0.33919(9) | 0.69437(19) | 0.0252(4)    |
| C8  | 0.7394(3)  | 0.36320(8) | 0.62008(18) | 0.0221(4)    |
| C10 | 0.0736(3)  | 0.30502(9) | 0.6390(2)   | 0.0254(4)    |
| C11 | 0.0022(3)  | 0.29559(8) | 0.50957(19) | 0.0205(4)    |
| C12 | 0.8020(3)  | 0.32004(7) | 0.42956(17) | 0.0166(4)    |
| C13 | 0.7629(3)  | 0.30694(7) | 0.29358(18) | 0.0168(4)    |
| C14 | 0.6163(3)  | 0.32934(7) | 0.19098(17) | 0.0154(3)    |
| C15 | 0.5935(3)  | 0.30988(9) | 0.05696(18) | 0.0196(4)    |
| C16 | 0.4784(3)  | 0.43520(7) | 0.18104(16) | 0.0141(3)    |
| C17 | 0.3069(3)  | 0.47596(8) | 0.13305(18) | 0.0201(4)    |
| C18 | 0.3585(4)  | 0.53502(9) | 0.13035(19) | 0.0232(4)    |
| C19 | 0.5810(3)  | 0.55414(8) | 0.17660(18) | 0.0218(4)    |
| C20 | 0.7514(3)  | 0.51402(8) | 0.2254(2)   | 0.0239(4)    |
| C21 | 0.7002(3)  | 0.45483(8) | 0.22770(19) | 0.0202(4)    |
| C22 | 0.3553(3)  | 0.42485(9) | 0.48026(19) | 0.0221(4)    |



## S9 Computational Details

All DFT static calculations were performed with the Gaussian 16 software package.<sup>[7]</sup> Geometry optimizations were performed without symmetry constraints and with analytical frequency calculations for the characterization of the located stationary points. These frequencies were used to calculate unscaled zero-point energies (ZPEs) as well as thermal corrections and entropy effects at 298 K. For this calculations, we used the BP86 functional of Becke and Perdew,<sup>[8],[9],[10]</sup> together with the Grimme D3 correction term to the electronic energy.<sup>[11]</sup> The electronic configuration of the molecular systems was described with the double- $\zeta$  basis set with polarization of Ahlrichs for main-group atoms (Def2SVP keyword in Gaussian),<sup>[12]</sup> whereas for silver atoms the small-core quasi-relativistic Stuttgart/Dresden effective core potential, with an associated valence basis set (standard SDD keywords in Gaussian16) were employed.<sup>[13],[14],[15]</sup> Energies were obtained by single-point calculations on the optimized geometries with the B3LYP functional,<sup>[16],[17]</sup> with the Grimme D3 correction term, coupled with the Def2TZVP basis set.<sup>[18]</sup> Solvent corrections were considered using the universal solvation model SMD of Cramer and Truhlar,<sup>[19]</sup> using chloroform as the solvent. The reported free energies in this work include energies obtained at the B3LYP-D3/Def2TZVP~sdd level of theory (with solvent corrections included) corrected with zero-point energies, thermal corrections and entropy effects evaluated at 298 K, achieved at the BP86-D3/Def2SVP~sdd level.

## S10 Mechanism discussion

### S10.1. Formation of vinylcarbene species F

Given the different mechanistic proposals based on literature precedents to obtain the vinylcarbene species **F** from the initial diazo species **A** (Scheme S1), the energy profiles for all the possibilities were studied in detail (Figure S1).

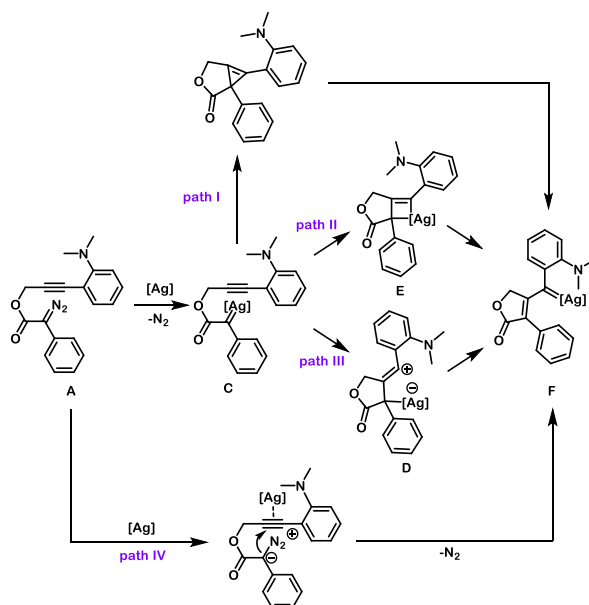

**Scheme S1.** Plausible mechanistic pathways for the formation of vinylcarbene species **F** from diazo species **A**, based on literature precedents.

Paths **I**, **II** and **III** share the first step of the transformation (already discussed and depicted in Scheme 4 and Figure 1 in the manuscript). Coordination of the silver complex to the carbenic carbon of the diazo species is a mildly endergonic step (3.7 kcal/mol) that is followed by extrusion of nitrogen through transition state **TS-BC** with an overall energy barrier of 11.9 kcal/mol with respect to **A** leading to the silver carbene **C** (-18.9 kcal/mol). On the other hand, path **IV** consists of the coordination of the silver catalyst to the triple bond of diazo species **A** to form intermediate **B1** with a relative energy of -3.2 kcal/mol with respect to isolated reactants. Then, the formation of the C-C bond takes place through transition state **TS-B1C1** with a kinetic cost of 15.9 kcal/mol from the previous minimum (see **Figure S1**). Therefore, given that the barrier to overcome **TS-B1C1** is 4.0 kcal/mol higher in energy than that for **TS-BC**, path **IV** can be discarded.

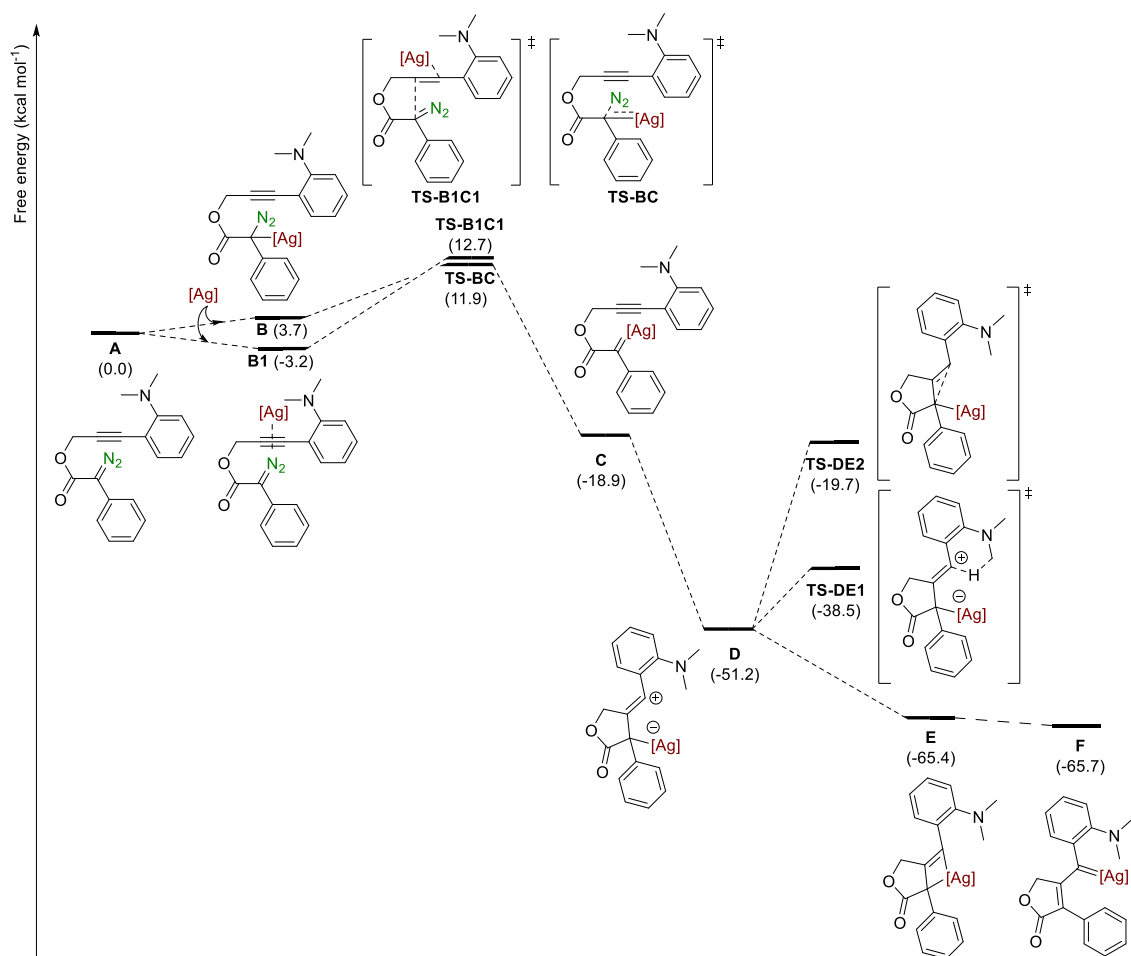

**Figure S1.** Gibbs energy profile (in kcal/mol) of the studied pathways for the formation of the vinylcarbene species ([Ag] = Tp<sup>(CF<sub>3</sub>)<sub>2</sub>,BrAg</sup>).

Once the carbene species **C** is generated, plausible pathways I, II and III (Scheme S1) are considered. As described in the manuscript, following path III silver carbene species **C** is transformed to ylide species **D** in a barrierless process. Ylide species **D** subsequently cyclizes to silver  $\eta^3$ -vinylcarbene **E**, that is the intermediate postulated in pathway II. At this point, pathway I which leads to the formation of the ring-fused cyclopropane was considered. The formation of this intermediate from **C** could not be located. However, its formation from ylide intermediate **D** was located and found to have a kinetic cost of 31.5 kcal/mol overcoming **TS-DE2**. Given the barrierless character of the evolution from ylide intermediate **D** to the vinylcarbene species **F**, all the described paths were discarded based on kinetic barriers (Figure S1), and the overall formation of silver  $\eta^1$ -vinylcarbene **F** is postulated based on DFT calculations to proceed through a new pathway that combines previously postulated paths II and III.

Moreover, the possibility of a H-shift through **TS-DE1** to the carbocation of the ylide intermediate was also considered, showing an energy barrier of 12.7 kcal/mol from **D**. Again, given the barrierless character of the evolution from ylide intermediate **D** to the vinylcarbene species **F**, the possibility of a H-shift was discarded based on kinetic barriers (Figure S1).

## S10.2. Kinetic barriers towards vinylogous and carbenic products

Due to the short difference between the kinetic barriers that lead to the vinylogous and carbenic products,<sup>[20],[21],[22]</sup> a benchmark study was carried out. In all cases, the kinetic cost to obtain the vinylogous product is lower than the one to obtain the carbenic product. The  $\Delta\Delta G^\ddagger$  values are in the 0.4 – 5.8 kcal/mol range as shown in Table S1.

**Table S1.** Benchmark study of the selectivity step for the formation of the vinylogous **7a** and carbenic **7a** products. Energies reported in kcal/mol.

| Level of theory for the solvent<br>single point calculations <sup>a</sup> | $\Delta G^\ddagger$ vinylogous<br>(kcal/mol) | $\Delta G^\ddagger$ carbenic<br>(kcal/mol) | $\Delta\Delta G^\ddagger$<br>(kcal/mol) |
|---------------------------------------------------------------------------|----------------------------------------------|--------------------------------------------|-----------------------------------------|
| B3LYP/6-31G**                                                             | 8.0                                          | 10.2                                       | 2.2                                     |
| B3LYP/Def2SVP                                                             | 7.5                                          | 9.5                                        | 2.0                                     |
| B3LYP/Def2TZVP                                                            | 10.5                                         | 10.9                                       | 0.4                                     |
| B3LYP/Def2TZVP-PCM                                                        | 10.1                                         | 10.6                                       | 0.4                                     |
| BP86/6-31G**                                                              | 6.2                                          | 9.3                                        | 3.1                                     |
| BP86/Def2SVP                                                              | 5.6                                          | 8.7                                        | 3.0                                     |
| BP86/Def2TZVP                                                             | 8.3                                          | 10.1                                       | 1.8                                     |
| M06/6-31G**                                                               | 5.9                                          | 11.6                                       | 5.6                                     |
| M06/Def2SVP                                                               | 5.0                                          | 10.8                                       | 5.8                                     |
| M06/Def2TZVP                                                              | 7.8                                          | 12.1                                       | 4.3                                     |
| PBE/6-31G**                                                               | 5.0                                          | 8.3                                        | 3.3                                     |
| PBE/Def2SVP                                                               | 4.4                                          | 7.6                                        | 3.2                                     |
| PBE/Def2TZVP                                                              | 7.1                                          | 9.2                                        | 2.1                                     |

<sup>a</sup>All optimizations were carried out at the BP86-D3/Def2SVP-SDD level of theory. Single point solvent calculations were carried out in the indicated levels of theory using the SMD solvation model in chloroform unless noted.

As a further test to confirm the accuracy of the chosen level of theory, the structure of **G**, **TS-GH** and **TS-GI** were optimized for substrates **5a** to **5f** of the manuscript. By means of transition state theory (TST) the vinylogous/carbenic product ratio was calculated and compared to the experimental results as shown in Table S2. For substrates **5a** to **5d** the DFT calculation predict that the vinylogous product is favored over the carbenic one as experimentally observed, for **5e** both products are predicted to be formed in a 1:1 ratio and were observed to be formed in 0.9:1 ratio, and finally for **5f** the carbenic product (**6f**) is computed to be favored over the vinylogous one (**7f**) as observed experimentally.

**Table S2.** Energy barrier difference (in kcal/mol) for the formation of the vinylogous and carbenic products calculated at the B3LYP-D3/Def2TZVP-SDD-SMD(CHCl<sub>3</sub>)//BP86-D3/Def2SVP-SDD level of theory.

| Species   | $\Delta\Delta G^\ddagger$ (kcal/mol) | Experimental              |
|-----------|--------------------------------------|---------------------------|
|           | vinylogous/carbenic ratio            | vinylogous/carbenic ratio |
| <b>7a</b> | 0.4 (2:1)                            | 71%/10% (7.1:1)           |
| <b>7b</b> | 0.9 (4.6:1)                          | 57%/22% (2.6:1)           |
| <b>7c</b> | 1.4 (10.6:1)                         | 42%/28% (1.5:1)           |
| <b>7d</b> | 1.3 (9.0:1)                          | 42%/33% (1.3:1)           |
| <b>7e</b> | 0.0 (1:1)                            | 30%/33% (0.9:1)           |
| <b>7f</b> | -1.2 (0.1:1)                         | 23%/38% (0.6:1)           |

### S10.3. Steric hindrance towards vinylogous and carbenic products

**Table S3.** Percentage buried volume (%V<sub>Bur</sub>) around the vinylogous and carbenic carbon atoms in the common minima **G** and their respective transition states **TS-GH** and **TS-GI** (with a radius of 3.5 Å).

|              |                   | Vinylogous | Carbenic |
|--------------|-------------------|------------|----------|
| <b>G</b>     | With Hydrogens    | 88.4       | 96.3     |
|              | Without Hydrogens | 86.9       | 94.9     |
| <b>TS-GH</b> | With Hydrogens    | 92.5       |          |
|              | Without Hydrogens | 90.6       |          |
| <b>TS-GI</b> | With Hydrogens    |            | 95.8     |
|              | Without Hydrogens |            | 94.5     |

## S11 XYZ Coordinates

| 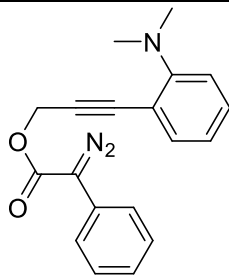                                                                                                                                                                                                                                                                                                                         | <p>41<br/>A SCF Done: -1048.14032018 A.U.</p> <table border="0"> <tbody> <tr><td>C</td><td>-1.492006</td><td>-1.066830</td><td>-0.818456</td></tr> <tr><td>C</td><td>-2.857448</td><td>-0.711982</td><td>-0.652870</td></tr> <tr><td>C</td><td>-3.652199</td><td>-1.297404</td><td>0.340585</td></tr> <tr><td>C</td><td>-3.122367</td><td>-2.269845</td><td>1.211189</td></tr> <tr><td>C</td><td>-1.772156</td><td>-2.620406</td><td>1.093407</td></tr> <tr><td>C</td><td>-0.939305</td><td>-2.023385</td><td>0.113600</td></tr> <tr><td>H</td><td>-3.306304</td><td>0.025887</td><td>-1.332340</td></tr> <tr><td>H</td><td>-4.710502</td><td>-1.001814</td><td>0.423893</td></tr> <tr><td>H</td><td>-3.752561</td><td>-2.737334</td><td>1.982781</td></tr> <tr><td>H</td><td>-1.319348</td><td>-3.342308</td><td>1.790517</td></tr> <tr><td>C</td><td>0.471117</td><td>-2.210744</td><td>0.157899</td></tr> <tr><td>C</td><td>1.701449</td><td>-2.226676</td><td>0.171701</td></tr> <tr><td>C</td><td>3.111895</td><td>-1.859886</td><td>0.191333</td></tr> <tr><td>H</td><td>3.511043</td><td>-1.862916</td><td>1.232690</td></tr> <tr><td>H</td><td>3.735215</td><td>-2.568495</td><td>-0.394748</td></tr> <tr><td>C</td><td>2.459017</td><td>0.463517</td><td>-0.497563</td></tr> <tr><td>C</td><td>1.653862</td><td>0.790739</td><td>0.697743</td></tr> <tr><td>C</td><td>0.452333</td><td>1.666851</td><td>0.662149</td></tr> <tr><td>C</td><td>0.469924</td><td>2.884950</td><td>-0.055411</td></tr> <tr><td>C</td><td>-0.726252</td><td>1.276242</td><td>1.338402</td></tr> <tr><td>C</td><td>-0.677125</td><td>3.693546</td><td>-0.090033</td></tr> <tr><td>H</td><td>1.380465</td><td>3.177156</td><td>-0.595953</td></tr> <tr><td>C</td><td>-1.868802</td><td>2.089858</td><td>1.298028</td></tr> <tr><td>H</td><td>-0.760890</td><td>0.308857</td><td>1.863791</td></tr> <tr><td>C</td><td>-1.848291</td><td>3.302453</td><td>0.585404</td></tr> <tr><td>H</td><td>-0.654978</td><td>4.640149</td><td>-0.652983</td></tr> <tr><td>H</td><td>-2.785624</td><td>1.758753</td><td>1.809631</td></tr> <tr><td>H</td><td>-2.745892</td><td>3.939902</td><td>0.551579</td></tr> <tr><td>O</td><td>3.371624</td><td>-0.566511</td><td>-0.440013</td></tr> <tr><td>O</td><td>2.376760</td><td>1.113891</td><td>-1.527616</td></tr> <tr><td>N</td><td>1.973210</td><td>0.253468</td><td>1.857568</td></tr> <tr><td>N</td><td>2.261749</td><td>-0.213435</td><td>2.868881</td></tr> <tr><td>C</td><td>0.184546</td><td>-1.227757</td><td>-2.656692</td></tr> <tr><td>H</td><td>1.191628</td><td>-0.762840</td><td>-2.718362</td></tr> <tr><td>H</td><td>0.298302</td><td>-2.264398</td><td>-2.295781</td></tr> <tr><td>H</td><td>-0.247015</td><td>-1.268879</td><td>-3.686165</td></tr> <tr><td>C</td><td>-1.073855</td><td>0.833095</td><td>-2.331676</td></tr> <tr><td>H</td><td>-1.768418</td><td>0.747203</td><td>-3.205237</td></tr> <tr><td>H</td><td>-1.545318</td><td>1.464246</td><td>-1.555382</td></tr> <tr><td>H</td><td>-0.152878</td><td>1.354563</td><td>-2.664717</td></tr> <tr><td>N</td><td>-0.692106</td><td>-0.455002</td><td>-1.778539</td></tr> </tbody> </table> | C              | -1.492006       | -1.066830      | -0.818456                                     | C               | -2.857448 | -0.711982       | -0.652870                                                                                                                                                                                                                                                                                                                                                                                                                                                                                                                                                                                                                                                                                                                                                                                                                                                                                                                                                                                                           | C  | -3.652199 | -1.297404 | 0.340585  | C | -3.122367 | -2.269845 | 1.211189  | C | -1.772156 | -2.620406 | 1.093407 | C | -0.939305 | -2.023385 | 0.113600  | H | -3.306304 | 0.025887  | -1.332340 | H | -4.710502 | -1.001814 | 0.423893  | H | -3.752561 | -2.737334 | 1.982781 | H | -1.319348 | -3.342308 | 1.790517 | C | 0.471117 | -2.210744 | 0.157899  | C | 1.701449 | -2.226676 | 0.171701 | C | 3.111895 | -1.859886 | 0.191333 | H | 3.511043 | -1.862916 | 1.232690  | H | 3.735215 | -2.568495 | -0.394748 | C | 2.459017 | 0.463517 | -0.497563 | C | 1.653862 | 0.790739 | 0.697743 | C | 0.452333 | 1.666851 | 0.662149 | C | 0.469924 | 2.884950 | -0.055411 | C | -0.726252 | 1.276242 | 1.338402 | C | -0.677125 | 3.693546 | -0.090033 | H | 1.380465 | 3.177156 | -0.595953 | C | -1.868802 | 2.089858 | 1.298028 | H | -0.760890 | 0.308857 | 1.863791 | C | -1.848291 | 3.302453 | 0.585404 | H | -0.654978 | 4.640149 | -0.652983 | H | -2.785624 | 1.758753 | 1.809631 | H | -2.745892 | 3.939902 | 0.551579 | O | 3.371624 | -0.566511 | -0.440013 | O | 2.376760 | 1.113891 | -1.527616 | N | 1.973210 | 0.253468 | 1.857568 | N | 2.261749 | -0.213435 | 2.868881 | C | 0.184546 | -1.227757 | -2.656692 | H | 1.191628 | -0.762840 | -2.718362 | H | 0.298302 | -2.264398 | -2.295781 | H | -0.247015 | -1.268879 | -3.686165 | C | -1.073855 | 0.833095 | -2.331676 | H | -1.768418 | 0.747203 | -3.205237 | H | -1.545318 | 1.464246 | -1.555382 | H | -0.152878 | 1.354563 | -2.664717 | N | -0.692106 | -0.455002 | -1.778539 |
|-----------------------------------------------------------------------------------------------------------------------------------------------------------------------------------------------------------------------------------------------------------------------------------------------------------------------------------------------------------------------------------------------------------|--------------------------------------------------------------------------------------------------------------------------------------------------------------------------------------------------------------------------------------------------------------------------------------------------------------------------------------------------------------------------------------------------------------------------------------------------------------------------------------------------------------------------------------------------------------------------------------------------------------------------------------------------------------------------------------------------------------------------------------------------------------------------------------------------------------------------------------------------------------------------------------------------------------------------------------------------------------------------------------------------------------------------------------------------------------------------------------------------------------------------------------------------------------------------------------------------------------------------------------------------------------------------------------------------------------------------------------------------------------------------------------------------------------------------------------------------------------------------------------------------------------------------------------------------------------------------------------------------------------------------------------------------------------------------------------------------------------------------------------------------------------------------------------------------------------------------------------------------------------------------------------------------------------------------------------------------------------------------------------------------------------------------------------------------------------------------------------------------------------------------------------------------------------------------------------------------------------------------------------------------------------------------------------------------------------------------------------------------------------------------------------------------------------------------------------------------------------------------------------------------------------------------------------------------------------------------------------------------------------------------------------------------------------------------------------------------------------------------------------------------------------------------------------------------------------------------------------------------------------------------------------------------------------------------------------------------------------------------------------------------------------------------------------------------------------------------------------------------------------------------------------------------------------------------------------------|----------------|-----------------|----------------|-----------------------------------------------|-----------------|-----------|-----------------|---------------------------------------------------------------------------------------------------------------------------------------------------------------------------------------------------------------------------------------------------------------------------------------------------------------------------------------------------------------------------------------------------------------------------------------------------------------------------------------------------------------------------------------------------------------------------------------------------------------------------------------------------------------------------------------------------------------------------------------------------------------------------------------------------------------------------------------------------------------------------------------------------------------------------------------------------------------------------------------------------------------------|----|-----------|-----------|-----------|---|-----------|-----------|-----------|---|-----------|-----------|----------|---|-----------|-----------|-----------|---|-----------|-----------|-----------|---|-----------|-----------|-----------|---|-----------|-----------|----------|---|-----------|-----------|----------|---|----------|-----------|-----------|---|----------|-----------|----------|---|----------|-----------|----------|---|----------|-----------|-----------|---|----------|-----------|-----------|---|----------|----------|-----------|---|----------|----------|----------|---|----------|----------|----------|---|----------|----------|-----------|---|-----------|----------|----------|---|-----------|----------|-----------|---|----------|----------|-----------|---|-----------|----------|----------|---|-----------|----------|----------|---|-----------|----------|----------|---|-----------|----------|-----------|---|-----------|----------|----------|---|-----------|----------|----------|---|----------|-----------|-----------|---|----------|----------|-----------|---|----------|----------|----------|---|----------|-----------|----------|---|----------|-----------|-----------|---|----------|-----------|-----------|---|----------|-----------|-----------|---|-----------|-----------|-----------|---|-----------|----------|-----------|---|-----------|----------|-----------|---|-----------|----------|-----------|---|-----------|----------|-----------|---|-----------|-----------|-----------|
| C                                                                                                                                                                                                                                                                                                                                                                                                         | -1.492006                                                                                                                                                                                                                                                                                                                                                                                                                                                                                                                                                                                                                                                                                                                                                                                                                                                                                                                                                                                                                                                                                                                                                                                                                                                                                                                                                                                                                                                                                                                                                                                                                                                                                                                                                                                                                                                                                                                                                                                                                                                                                                                                                                                                                                                                                                                                                                                                                                                                                                                                                                                                                                                                                                                                                                                                                                                                                                                                                                                                                                                                                                                                                                                  | -1.066830      | -0.818456       |                |                                               |                 |           |                 |                                                                                                                                                                                                                                                                                                                                                                                                                                                                                                                                                                                                                                                                                                                                                                                                                                                                                                                                                                                                                     |    |           |           |           |   |           |           |           |   |           |           |          |   |           |           |           |   |           |           |           |   |           |           |           |   |           |           |          |   |           |           |          |   |          |           |           |   |          |           |          |   |          |           |          |   |          |           |           |   |          |           |           |   |          |          |           |   |          |          |          |   |          |          |          |   |          |          |           |   |           |          |          |   |           |          |           |   |          |          |           |   |           |          |          |   |           |          |          |   |           |          |          |   |           |          |           |   |           |          |          |   |           |          |          |   |          |           |           |   |          |          |           |   |          |          |          |   |          |           |          |   |          |           |           |   |          |           |           |   |          |           |           |   |           |           |           |   |           |          |           |   |           |          |           |   |           |          |           |   |           |          |           |   |           |           |           |
| C                                                                                                                                                                                                                                                                                                                                                                                                         | -2.857448                                                                                                                                                                                                                                                                                                                                                                                                                                                                                                                                                                                                                                                                                                                                                                                                                                                                                                                                                                                                                                                                                                                                                                                                                                                                                                                                                                                                                                                                                                                                                                                                                                                                                                                                                                                                                                                                                                                                                                                                                                                                                                                                                                                                                                                                                                                                                                                                                                                                                                                                                                                                                                                                                                                                                                                                                                                                                                                                                                                                                                                                                                                                                                                  | -0.711982      | -0.652870       |                |                                               |                 |           |                 |                                                                                                                                                                                                                                                                                                                                                                                                                                                                                                                                                                                                                                                                                                                                                                                                                                                                                                                                                                                                                     |    |           |           |           |   |           |           |           |   |           |           |          |   |           |           |           |   |           |           |           |   |           |           |           |   |           |           |          |   |           |           |          |   |          |           |           |   |          |           |          |   |          |           |          |   |          |           |           |   |          |           |           |   |          |          |           |   |          |          |          |   |          |          |          |   |          |          |           |   |           |          |          |   |           |          |           |   |          |          |           |   |           |          |          |   |           |          |          |   |           |          |          |   |           |          |           |   |           |          |          |   |           |          |          |   |          |           |           |   |          |          |           |   |          |          |          |   |          |           |          |   |          |           |           |   |          |           |           |   |          |           |           |   |           |           |           |   |           |          |           |   |           |          |           |   |           |          |           |   |           |          |           |   |           |           |           |
| C                                                                                                                                                                                                                                                                                                                                                                                                         | -3.652199                                                                                                                                                                                                                                                                                                                                                                                                                                                                                                                                                                                                                                                                                                                                                                                                                                                                                                                                                                                                                                                                                                                                                                                                                                                                                                                                                                                                                                                                                                                                                                                                                                                                                                                                                                                                                                                                                                                                                                                                                                                                                                                                                                                                                                                                                                                                                                                                                                                                                                                                                                                                                                                                                                                                                                                                                                                                                                                                                                                                                                                                                                                                                                                  | -1.297404      | 0.340585        |                |                                               |                 |           |                 |                                                                                                                                                                                                                                                                                                                                                                                                                                                                                                                                                                                                                                                                                                                                                                                                                                                                                                                                                                                                                     |    |           |           |           |   |           |           |           |   |           |           |          |   |           |           |           |   |           |           |           |   |           |           |           |   |           |           |          |   |           |           |          |   |          |           |           |   |          |           |          |   |          |           |          |   |          |           |           |   |          |           |           |   |          |          |           |   |          |          |          |   |          |          |          |   |          |          |           |   |           |          |          |   |           |          |           |   |          |          |           |   |           |          |          |   |           |          |          |   |           |          |          |   |           |          |           |   |           |          |          |   |           |          |          |   |          |           |           |   |          |          |           |   |          |          |          |   |          |           |          |   |          |           |           |   |          |           |           |   |          |           |           |   |           |           |           |   |           |          |           |   |           |          |           |   |           |          |           |   |           |          |           |   |           |           |           |
| C                                                                                                                                                                                                                                                                                                                                                                                                         | -3.122367                                                                                                                                                                                                                                                                                                                                                                                                                                                                                                                                                                                                                                                                                                                                                                                                                                                                                                                                                                                                                                                                                                                                                                                                                                                                                                                                                                                                                                                                                                                                                                                                                                                                                                                                                                                                                                                                                                                                                                                                                                                                                                                                                                                                                                                                                                                                                                                                                                                                                                                                                                                                                                                                                                                                                                                                                                                                                                                                                                                                                                                                                                                                                                                  | -2.269845      | 1.211189        |                |                                               |                 |           |                 |                                                                                                                                                                                                                                                                                                                                                                                                                                                                                                                                                                                                                                                                                                                                                                                                                                                                                                                                                                                                                     |    |           |           |           |   |           |           |           |   |           |           |          |   |           |           |           |   |           |           |           |   |           |           |           |   |           |           |          |   |           |           |          |   |          |           |           |   |          |           |          |   |          |           |          |   |          |           |           |   |          |           |           |   |          |          |           |   |          |          |          |   |          |          |          |   |          |          |           |   |           |          |          |   |           |          |           |   |          |          |           |   |           |          |          |   |           |          |          |   |           |          |          |   |           |          |           |   |           |          |          |   |           |          |          |   |          |           |           |   |          |          |           |   |          |          |          |   |          |           |          |   |          |           |           |   |          |           |           |   |          |           |           |   |           |           |           |   |           |          |           |   |           |          |           |   |           |          |           |   |           |          |           |   |           |           |           |
| C                                                                                                                                                                                                                                                                                                                                                                                                         | -1.772156                                                                                                                                                                                                                                                                                                                                                                                                                                                                                                                                                                                                                                                                                                                                                                                                                                                                                                                                                                                                                                                                                                                                                                                                                                                                                                                                                                                                                                                                                                                                                                                                                                                                                                                                                                                                                                                                                                                                                                                                                                                                                                                                                                                                                                                                                                                                                                                                                                                                                                                                                                                                                                                                                                                                                                                                                                                                                                                                                                                                                                                                                                                                                                                  | -2.620406      | 1.093407        |                |                                               |                 |           |                 |                                                                                                                                                                                                                                                                                                                                                                                                                                                                                                                                                                                                                                                                                                                                                                                                                                                                                                                                                                                                                     |    |           |           |           |   |           |           |           |   |           |           |          |   |           |           |           |   |           |           |           |   |           |           |           |   |           |           |          |   |           |           |          |   |          |           |           |   |          |           |          |   |          |           |          |   |          |           |           |   |          |           |           |   |          |          |           |   |          |          |          |   |          |          |          |   |          |          |           |   |           |          |          |   |           |          |           |   |          |          |           |   |           |          |          |   |           |          |          |   |           |          |          |   |           |          |           |   |           |          |          |   |           |          |          |   |          |           |           |   |          |          |           |   |          |          |          |   |          |           |          |   |          |           |           |   |          |           |           |   |          |           |           |   |           |           |           |   |           |          |           |   |           |          |           |   |           |          |           |   |           |          |           |   |           |           |           |
| C                                                                                                                                                                                                                                                                                                                                                                                                         | -0.939305                                                                                                                                                                                                                                                                                                                                                                                                                                                                                                                                                                                                                                                                                                                                                                                                                                                                                                                                                                                                                                                                                                                                                                                                                                                                                                                                                                                                                                                                                                                                                                                                                                                                                                                                                                                                                                                                                                                                                                                                                                                                                                                                                                                                                                                                                                                                                                                                                                                                                                                                                                                                                                                                                                                                                                                                                                                                                                                                                                                                                                                                                                                                                                                  | -2.023385      | 0.113600        |                |                                               |                 |           |                 |                                                                                                                                                                                                                                                                                                                                                                                                                                                                                                                                                                                                                                                                                                                                                                                                                                                                                                                                                                                                                     |    |           |           |           |   |           |           |           |   |           |           |          |   |           |           |           |   |           |           |           |   |           |           |           |   |           |           |          |   |           |           |          |   |          |           |           |   |          |           |          |   |          |           |          |   |          |           |           |   |          |           |           |   |          |          |           |   |          |          |          |   |          |          |          |   |          |          |           |   |           |          |          |   |           |          |           |   |          |          |           |   |           |          |          |   |           |          |          |   |           |          |          |   |           |          |           |   |           |          |          |   |           |          |          |   |          |           |           |   |          |          |           |   |          |          |          |   |          |           |          |   |          |           |           |   |          |           |           |   |          |           |           |   |           |           |           |   |           |          |           |   |           |          |           |   |           |          |           |   |           |          |           |   |           |           |           |
| H                                                                                                                                                                                                                                                                                                                                                                                                         | -3.306304                                                                                                                                                                                                                                                                                                                                                                                                                                                                                                                                                                                                                                                                                                                                                                                                                                                                                                                                                                                                                                                                                                                                                                                                                                                                                                                                                                                                                                                                                                                                                                                                                                                                                                                                                                                                                                                                                                                                                                                                                                                                                                                                                                                                                                                                                                                                                                                                                                                                                                                                                                                                                                                                                                                                                                                                                                                                                                                                                                                                                                                                                                                                                                                  | 0.025887       | -1.332340       |                |                                               |                 |           |                 |                                                                                                                                                                                                                                                                                                                                                                                                                                                                                                                                                                                                                                                                                                                                                                                                                                                                                                                                                                                                                     |    |           |           |           |   |           |           |           |   |           |           |          |   |           |           |           |   |           |           |           |   |           |           |           |   |           |           |          |   |           |           |          |   |          |           |           |   |          |           |          |   |          |           |          |   |          |           |           |   |          |           |           |   |          |          |           |   |          |          |          |   |          |          |          |   |          |          |           |   |           |          |          |   |           |          |           |   |          |          |           |   |           |          |          |   |           |          |          |   |           |          |          |   |           |          |           |   |           |          |          |   |           |          |          |   |          |           |           |   |          |          |           |   |          |          |          |   |          |           |          |   |          |           |           |   |          |           |           |   |          |           |           |   |           |           |           |   |           |          |           |   |           |          |           |   |           |          |           |   |           |          |           |   |           |           |           |
| H                                                                                                                                                                                                                                                                                                                                                                                                         | -4.710502                                                                                                                                                                                                                                                                                                                                                                                                                                                                                                                                                                                                                                                                                                                                                                                                                                                                                                                                                                                                                                                                                                                                                                                                                                                                                                                                                                                                                                                                                                                                                                                                                                                                                                                                                                                                                                                                                                                                                                                                                                                                                                                                                                                                                                                                                                                                                                                                                                                                                                                                                                                                                                                                                                                                                                                                                                                                                                                                                                                                                                                                                                                                                                                  | -1.001814      | 0.423893        |                |                                               |                 |           |                 |                                                                                                                                                                                                                                                                                                                                                                                                                                                                                                                                                                                                                                                                                                                                                                                                                                                                                                                                                                                                                     |    |           |           |           |   |           |           |           |   |           |           |          |   |           |           |           |   |           |           |           |   |           |           |           |   |           |           |          |   |           |           |          |   |          |           |           |   |          |           |          |   |          |           |          |   |          |           |           |   |          |           |           |   |          |          |           |   |          |          |          |   |          |          |          |   |          |          |           |   |           |          |          |   |           |          |           |   |          |          |           |   |           |          |          |   |           |          |          |   |           |          |          |   |           |          |           |   |           |          |          |   |           |          |          |   |          |           |           |   |          |          |           |   |          |          |          |   |          |           |          |   |          |           |           |   |          |           |           |   |          |           |           |   |           |           |           |   |           |          |           |   |           |          |           |   |           |          |           |   |           |          |           |   |           |           |           |
| H                                                                                                                                                                                                                                                                                                                                                                                                         | -3.752561                                                                                                                                                                                                                                                                                                                                                                                                                                                                                                                                                                                                                                                                                                                                                                                                                                                                                                                                                                                                                                                                                                                                                                                                                                                                                                                                                                                                                                                                                                                                                                                                                                                                                                                                                                                                                                                                                                                                                                                                                                                                                                                                                                                                                                                                                                                                                                                                                                                                                                                                                                                                                                                                                                                                                                                                                                                                                                                                                                                                                                                                                                                                                                                  | -2.737334      | 1.982781        |                |                                               |                 |           |                 |                                                                                                                                                                                                                                                                                                                                                                                                                                                                                                                                                                                                                                                                                                                                                                                                                                                                                                                                                                                                                     |    |           |           |           |   |           |           |           |   |           |           |          |   |           |           |           |   |           |           |           |   |           |           |           |   |           |           |          |   |           |           |          |   |          |           |           |   |          |           |          |   |          |           |          |   |          |           |           |   |          |           |           |   |          |          |           |   |          |          |          |   |          |          |          |   |          |          |           |   |           |          |          |   |           |          |           |   |          |          |           |   |           |          |          |   |           |          |          |   |           |          |          |   |           |          |           |   |           |          |          |   |           |          |          |   |          |           |           |   |          |          |           |   |          |          |          |   |          |           |          |   |          |           |           |   |          |           |           |   |          |           |           |   |           |           |           |   |           |          |           |   |           |          |           |   |           |          |           |   |           |          |           |   |           |           |           |
| H                                                                                                                                                                                                                                                                                                                                                                                                         | -1.319348                                                                                                                                                                                                                                                                                                                                                                                                                                                                                                                                                                                                                                                                                                                                                                                                                                                                                                                                                                                                                                                                                                                                                                                                                                                                                                                                                                                                                                                                                                                                                                                                                                                                                                                                                                                                                                                                                                                                                                                                                                                                                                                                                                                                                                                                                                                                                                                                                                                                                                                                                                                                                                                                                                                                                                                                                                                                                                                                                                                                                                                                                                                                                                                  | -3.342308      | 1.790517        |                |                                               |                 |           |                 |                                                                                                                                                                                                                                                                                                                                                                                                                                                                                                                                                                                                                                                                                                                                                                                                                                                                                                                                                                                                                     |    |           |           |           |   |           |           |           |   |           |           |          |   |           |           |           |   |           |           |           |   |           |           |           |   |           |           |          |   |           |           |          |   |          |           |           |   |          |           |          |   |          |           |          |   |          |           |           |   |          |           |           |   |          |          |           |   |          |          |          |   |          |          |          |   |          |          |           |   |           |          |          |   |           |          |           |   |          |          |           |   |           |          |          |   |           |          |          |   |           |          |          |   |           |          |           |   |           |          |          |   |           |          |          |   |          |           |           |   |          |          |           |   |          |          |          |   |          |           |          |   |          |           |           |   |          |           |           |   |          |           |           |   |           |           |           |   |           |          |           |   |           |          |           |   |           |          |           |   |           |          |           |   |           |           |           |
| C                                                                                                                                                                                                                                                                                                                                                                                                         | 0.471117                                                                                                                                                                                                                                                                                                                                                                                                                                                                                                                                                                                                                                                                                                                                                                                                                                                                                                                                                                                                                                                                                                                                                                                                                                                                                                                                                                                                                                                                                                                                                                                                                                                                                                                                                                                                                                                                                                                                                                                                                                                                                                                                                                                                                                                                                                                                                                                                                                                                                                                                                                                                                                                                                                                                                                                                                                                                                                                                                                                                                                                                                                                                                                                   | -2.210744      | 0.157899        |                |                                               |                 |           |                 |                                                                                                                                                                                                                                                                                                                                                                                                                                                                                                                                                                                                                                                                                                                                                                                                                                                                                                                                                                                                                     |    |           |           |           |   |           |           |           |   |           |           |          |   |           |           |           |   |           |           |           |   |           |           |           |   |           |           |          |   |           |           |          |   |          |           |           |   |          |           |          |   |          |           |          |   |          |           |           |   |          |           |           |   |          |          |           |   |          |          |          |   |          |          |          |   |          |          |           |   |           |          |          |   |           |          |           |   |          |          |           |   |           |          |          |   |           |          |          |   |           |          |          |   |           |          |           |   |           |          |          |   |           |          |          |   |          |           |           |   |          |          |           |   |          |          |          |   |          |           |          |   |          |           |           |   |          |           |           |   |          |           |           |   |           |           |           |   |           |          |           |   |           |          |           |   |           |          |           |   |           |          |           |   |           |           |           |
| C                                                                                                                                                                                                                                                                                                                                                                                                         | 1.701449                                                                                                                                                                                                                                                                                                                                                                                                                                                                                                                                                                                                                                                                                                                                                                                                                                                                                                                                                                                                                                                                                                                                                                                                                                                                                                                                                                                                                                                                                                                                                                                                                                                                                                                                                                                                                                                                                                                                                                                                                                                                                                                                                                                                                                                                                                                                                                                                                                                                                                                                                                                                                                                                                                                                                                                                                                                                                                                                                                                                                                                                                                                                                                                   | -2.226676      | 0.171701        |                |                                               |                 |           |                 |                                                                                                                                                                                                                                                                                                                                                                                                                                                                                                                                                                                                                                                                                                                                                                                                                                                                                                                                                                                                                     |    |           |           |           |   |           |           |           |   |           |           |          |   |           |           |           |   |           |           |           |   |           |           |           |   |           |           |          |   |           |           |          |   |          |           |           |   |          |           |          |   |          |           |          |   |          |           |           |   |          |           |           |   |          |          |           |   |          |          |          |   |          |          |          |   |          |          |           |   |           |          |          |   |           |          |           |   |          |          |           |   |           |          |          |   |           |          |          |   |           |          |          |   |           |          |           |   |           |          |          |   |           |          |          |   |          |           |           |   |          |          |           |   |          |          |          |   |          |           |          |   |          |           |           |   |          |           |           |   |          |           |           |   |           |           |           |   |           |          |           |   |           |          |           |   |           |          |           |   |           |          |           |   |           |           |           |
| C                                                                                                                                                                                                                                                                                                                                                                                                         | 3.111895                                                                                                                                                                                                                                                                                                                                                                                                                                                                                                                                                                                                                                                                                                                                                                                                                                                                                                                                                                                                                                                                                                                                                                                                                                                                                                                                                                                                                                                                                                                                                                                                                                                                                                                                                                                                                                                                                                                                                                                                                                                                                                                                                                                                                                                                                                                                                                                                                                                                                                                                                                                                                                                                                                                                                                                                                                                                                                                                                                                                                                                                                                                                                                                   | -1.859886      | 0.191333        |                |                                               |                 |           |                 |                                                                                                                                                                                                                                                                                                                                                                                                                                                                                                                                                                                                                                                                                                                                                                                                                                                                                                                                                                                                                     |    |           |           |           |   |           |           |           |   |           |           |          |   |           |           |           |   |           |           |           |   |           |           |           |   |           |           |          |   |           |           |          |   |          |           |           |   |          |           |          |   |          |           |          |   |          |           |           |   |          |           |           |   |          |          |           |   |          |          |          |   |          |          |          |   |          |          |           |   |           |          |          |   |           |          |           |   |          |          |           |   |           |          |          |   |           |          |          |   |           |          |          |   |           |          |           |   |           |          |          |   |           |          |          |   |          |           |           |   |          |          |           |   |          |          |          |   |          |           |          |   |          |           |           |   |          |           |           |   |          |           |           |   |           |           |           |   |           |          |           |   |           |          |           |   |           |          |           |   |           |          |           |   |           |           |           |
| H                                                                                                                                                                                                                                                                                                                                                                                                         | 3.511043                                                                                                                                                                                                                                                                                                                                                                                                                                                                                                                                                                                                                                                                                                                                                                                                                                                                                                                                                                                                                                                                                                                                                                                                                                                                                                                                                                                                                                                                                                                                                                                                                                                                                                                                                                                                                                                                                                                                                                                                                                                                                                                                                                                                                                                                                                                                                                                                                                                                                                                                                                                                                                                                                                                                                                                                                                                                                                                                                                                                                                                                                                                                                                                   | -1.862916      | 1.232690        |                |                                               |                 |           |                 |                                                                                                                                                                                                                                                                                                                                                                                                                                                                                                                                                                                                                                                                                                                                                                                                                                                                                                                                                                                                                     |    |           |           |           |   |           |           |           |   |           |           |          |   |           |           |           |   |           |           |           |   |           |           |           |   |           |           |          |   |           |           |          |   |          |           |           |   |          |           |          |   |          |           |          |   |          |           |           |   |          |           |           |   |          |          |           |   |          |          |          |   |          |          |          |   |          |          |           |   |           |          |          |   |           |          |           |   |          |          |           |   |           |          |          |   |           |          |          |   |           |          |          |   |           |          |           |   |           |          |          |   |           |          |          |   |          |           |           |   |          |          |           |   |          |          |          |   |          |           |          |   |          |           |           |   |          |           |           |   |          |           |           |   |           |           |           |   |           |          |           |   |           |          |           |   |           |          |           |   |           |          |           |   |           |           |           |
| H                                                                                                                                                                                                                                                                                                                                                                                                         | 3.735215                                                                                                                                                                                                                                                                                                                                                                                                                                                                                                                                                                                                                                                                                                                                                                                                                                                                                                                                                                                                                                                                                                                                                                                                                                                                                                                                                                                                                                                                                                                                                                                                                                                                                                                                                                                                                                                                                                                                                                                                                                                                                                                                                                                                                                                                                                                                                                                                                                                                                                                                                                                                                                                                                                                                                                                                                                                                                                                                                                                                                                                                                                                                                                                   | -2.568495      | -0.394748       |                |                                               |                 |           |                 |                                                                                                                                                                                                                                                                                                                                                                                                                                                                                                                                                                                                                                                                                                                                                                                                                                                                                                                                                                                                                     |    |           |           |           |   |           |           |           |   |           |           |          |   |           |           |           |   |           |           |           |   |           |           |           |   |           |           |          |   |           |           |          |   |          |           |           |   |          |           |          |   |          |           |          |   |          |           |           |   |          |           |           |   |          |          |           |   |          |          |          |   |          |          |          |   |          |          |           |   |           |          |          |   |           |          |           |   |          |          |           |   |           |          |          |   |           |          |          |   |           |          |          |   |           |          |           |   |           |          |          |   |           |          |          |   |          |           |           |   |          |          |           |   |          |          |          |   |          |           |          |   |          |           |           |   |          |           |           |   |          |           |           |   |           |           |           |   |           |          |           |   |           |          |           |   |           |          |           |   |           |          |           |   |           |           |           |
| C                                                                                                                                                                                                                                                                                                                                                                                                         | 2.459017                                                                                                                                                                                                                                                                                                                                                                                                                                                                                                                                                                                                                                                                                                                                                                                                                                                                                                                                                                                                                                                                                                                                                                                                                                                                                                                                                                                                                                                                                                                                                                                                                                                                                                                                                                                                                                                                                                                                                                                                                                                                                                                                                                                                                                                                                                                                                                                                                                                                                                                                                                                                                                                                                                                                                                                                                                                                                                                                                                                                                                                                                                                                                                                   | 0.463517       | -0.497563       |                |                                               |                 |           |                 |                                                                                                                                                                                                                                                                                                                                                                                                                                                                                                                                                                                                                                                                                                                                                                                                                                                                                                                                                                                                                     |    |           |           |           |   |           |           |           |   |           |           |          |   |           |           |           |   |           |           |           |   |           |           |           |   |           |           |          |   |           |           |          |   |          |           |           |   |          |           |          |   |          |           |          |   |          |           |           |   |          |           |           |   |          |          |           |   |          |          |          |   |          |          |          |   |          |          |           |   |           |          |          |   |           |          |           |   |          |          |           |   |           |          |          |   |           |          |          |   |           |          |          |   |           |          |           |   |           |          |          |   |           |          |          |   |          |           |           |   |          |          |           |   |          |          |          |   |          |           |          |   |          |           |           |   |          |           |           |   |          |           |           |   |           |           |           |   |           |          |           |   |           |          |           |   |           |          |           |   |           |          |           |   |           |           |           |
| C                                                                                                                                                                                                                                                                                                                                                                                                         | 1.653862                                                                                                                                                                                                                                                                                                                                                                                                                                                                                                                                                                                                                                                                                                                                                                                                                                                                                                                                                                                                                                                                                                                                                                                                                                                                                                                                                                                                                                                                                                                                                                                                                                                                                                                                                                                                                                                                                                                                                                                                                                                                                                                                                                                                                                                                                                                                                                                                                                                                                                                                                                                                                                                                                                                                                                                                                                                                                                                                                                                                                                                                                                                                                                                   | 0.790739       | 0.697743        |                |                                               |                 |           |                 |                                                                                                                                                                                                                                                                                                                                                                                                                                                                                                                                                                                                                                                                                                                                                                                                                                                                                                                                                                                                                     |    |           |           |           |   |           |           |           |   |           |           |          |   |           |           |           |   |           |           |           |   |           |           |           |   |           |           |          |   |           |           |          |   |          |           |           |   |          |           |          |   |          |           |          |   |          |           |           |   |          |           |           |   |          |          |           |   |          |          |          |   |          |          |          |   |          |          |           |   |           |          |          |   |           |          |           |   |          |          |           |   |           |          |          |   |           |          |          |   |           |          |          |   |           |          |           |   |           |          |          |   |           |          |          |   |          |           |           |   |          |          |           |   |          |          |          |   |          |           |          |   |          |           |           |   |          |           |           |   |          |           |           |   |           |           |           |   |           |          |           |   |           |          |           |   |           |          |           |   |           |          |           |   |           |           |           |
| C                                                                                                                                                                                                                                                                                                                                                                                                         | 0.452333                                                                                                                                                                                                                                                                                                                                                                                                                                                                                                                                                                                                                                                                                                                                                                                                                                                                                                                                                                                                                                                                                                                                                                                                                                                                                                                                                                                                                                                                                                                                                                                                                                                                                                                                                                                                                                                                                                                                                                                                                                                                                                                                                                                                                                                                                                                                                                                                                                                                                                                                                                                                                                                                                                                                                                                                                                                                                                                                                                                                                                                                                                                                                                                   | 1.666851       | 0.662149        |                |                                               |                 |           |                 |                                                                                                                                                                                                                                                                                                                                                                                                                                                                                                                                                                                                                                                                                                                                                                                                                                                                                                                                                                                                                     |    |           |           |           |   |           |           |           |   |           |           |          |   |           |           |           |   |           |           |           |   |           |           |           |   |           |           |          |   |           |           |          |   |          |           |           |   |          |           |          |   |          |           |          |   |          |           |           |   |          |           |           |   |          |          |           |   |          |          |          |   |          |          |          |   |          |          |           |   |           |          |          |   |           |          |           |   |          |          |           |   |           |          |          |   |           |          |          |   |           |          |          |   |           |          |           |   |           |          |          |   |           |          |          |   |          |           |           |   |          |          |           |   |          |          |          |   |          |           |          |   |          |           |           |   |          |           |           |   |          |           |           |   |           |           |           |   |           |          |           |   |           |          |           |   |           |          |           |   |           |          |           |   |           |           |           |
| C                                                                                                                                                                                                                                                                                                                                                                                                         | 0.469924                                                                                                                                                                                                                                                                                                                                                                                                                                                                                                                                                                                                                                                                                                                                                                                                                                                                                                                                                                                                                                                                                                                                                                                                                                                                                                                                                                                                                                                                                                                                                                                                                                                                                                                                                                                                                                                                                                                                                                                                                                                                                                                                                                                                                                                                                                                                                                                                                                                                                                                                                                                                                                                                                                                                                                                                                                                                                                                                                                                                                                                                                                                                                                                   | 2.884950       | -0.055411       |                |                                               |                 |           |                 |                                                                                                                                                                                                                                                                                                                                                                                                                                                                                                                                                                                                                                                                                                                                                                                                                                                                                                                                                                                                                     |    |           |           |           |   |           |           |           |   |           |           |          |   |           |           |           |   |           |           |           |   |           |           |           |   |           |           |          |   |           |           |          |   |          |           |           |   |          |           |          |   |          |           |          |   |          |           |           |   |          |           |           |   |          |          |           |   |          |          |          |   |          |          |          |   |          |          |           |   |           |          |          |   |           |          |           |   |          |          |           |   |           |          |          |   |           |          |          |   |           |          |          |   |           |          |           |   |           |          |          |   |           |          |          |   |          |           |           |   |          |          |           |   |          |          |          |   |          |           |          |   |          |           |           |   |          |           |           |   |          |           |           |   |           |           |           |   |           |          |           |   |           |          |           |   |           |          |           |   |           |          |           |   |           |           |           |
| C                                                                                                                                                                                                                                                                                                                                                                                                         | -0.726252                                                                                                                                                                                                                                                                                                                                                                                                                                                                                                                                                                                                                                                                                                                                                                                                                                                                                                                                                                                                                                                                                                                                                                                                                                                                                                                                                                                                                                                                                                                                                                                                                                                                                                                                                                                                                                                                                                                                                                                                                                                                                                                                                                                                                                                                                                                                                                                                                                                                                                                                                                                                                                                                                                                                                                                                                                                                                                                                                                                                                                                                                                                                                                                  | 1.276242       | 1.338402        |                |                                               |                 |           |                 |                                                                                                                                                                                                                                                                                                                                                                                                                                                                                                                                                                                                                                                                                                                                                                                                                                                                                                                                                                                                                     |    |           |           |           |   |           |           |           |   |           |           |          |   |           |           |           |   |           |           |           |   |           |           |           |   |           |           |          |   |           |           |          |   |          |           |           |   |          |           |          |   |          |           |          |   |          |           |           |   |          |           |           |   |          |          |           |   |          |          |          |   |          |          |          |   |          |          |           |   |           |          |          |   |           |          |           |   |          |          |           |   |           |          |          |   |           |          |          |   |           |          |          |   |           |          |           |   |           |          |          |   |           |          |          |   |          |           |           |   |          |          |           |   |          |          |          |   |          |           |          |   |          |           |           |   |          |           |           |   |          |           |           |   |           |           |           |   |           |          |           |   |           |          |           |   |           |          |           |   |           |          |           |   |           |           |           |
| C                                                                                                                                                                                                                                                                                                                                                                                                         | -0.677125                                                                                                                                                                                                                                                                                                                                                                                                                                                                                                                                                                                                                                                                                                                                                                                                                                                                                                                                                                                                                                                                                                                                                                                                                                                                                                                                                                                                                                                                                                                                                                                                                                                                                                                                                                                                                                                                                                                                                                                                                                                                                                                                                                                                                                                                                                                                                                                                                                                                                                                                                                                                                                                                                                                                                                                                                                                                                                                                                                                                                                                                                                                                                                                  | 3.693546       | -0.090033       |                |                                               |                 |           |                 |                                                                                                                                                                                                                                                                                                                                                                                                                                                                                                                                                                                                                                                                                                                                                                                                                                                                                                                                                                                                                     |    |           |           |           |   |           |           |           |   |           |           |          |   |           |           |           |   |           |           |           |   |           |           |           |   |           |           |          |   |           |           |          |   |          |           |           |   |          |           |          |   |          |           |          |   |          |           |           |   |          |           |           |   |          |          |           |   |          |          |          |   |          |          |          |   |          |          |           |   |           |          |          |   |           |          |           |   |          |          |           |   |           |          |          |   |           |          |          |   |           |          |          |   |           |          |           |   |           |          |          |   |           |          |          |   |          |           |           |   |          |          |           |   |          |          |          |   |          |           |          |   |          |           |           |   |          |           |           |   |          |           |           |   |           |           |           |   |           |          |           |   |           |          |           |   |           |          |           |   |           |          |           |   |           |           |           |
| H                                                                                                                                                                                                                                                                                                                                                                                                         | 1.380465                                                                                                                                                                                                                                                                                                                                                                                                                                                                                                                                                                                                                                                                                                                                                                                                                                                                                                                                                                                                                                                                                                                                                                                                                                                                                                                                                                                                                                                                                                                                                                                                                                                                                                                                                                                                                                                                                                                                                                                                                                                                                                                                                                                                                                                                                                                                                                                                                                                                                                                                                                                                                                                                                                                                                                                                                                                                                                                                                                                                                                                                                                                                                                                   | 3.177156       | -0.595953       |                |                                               |                 |           |                 |                                                                                                                                                                                                                                                                                                                                                                                                                                                                                                                                                                                                                                                                                                                                                                                                                                                                                                                                                                                                                     |    |           |           |           |   |           |           |           |   |           |           |          |   |           |           |           |   |           |           |           |   |           |           |           |   |           |           |          |   |           |           |          |   |          |           |           |   |          |           |          |   |          |           |          |   |          |           |           |   |          |           |           |   |          |          |           |   |          |          |          |   |          |          |          |   |          |          |           |   |           |          |          |   |           |          |           |   |          |          |           |   |           |          |          |   |           |          |          |   |           |          |          |   |           |          |           |   |           |          |          |   |           |          |          |   |          |           |           |   |          |          |           |   |          |          |          |   |          |           |          |   |          |           |           |   |          |           |           |   |          |           |           |   |           |           |           |   |           |          |           |   |           |          |           |   |           |          |           |   |           |          |           |   |           |           |           |
| C                                                                                                                                                                                                                                                                                                                                                                                                         | -1.868802                                                                                                                                                                                                                                                                                                                                                                                                                                                                                                                                                                                                                                                                                                                                                                                                                                                                                                                                                                                                                                                                                                                                                                                                                                                                                                                                                                                                                                                                                                                                                                                                                                                                                                                                                                                                                                                                                                                                                                                                                                                                                                                                                                                                                                                                                                                                                                                                                                                                                                                                                                                                                                                                                                                                                                                                                                                                                                                                                                                                                                                                                                                                                                                  | 2.089858       | 1.298028        |                |                                               |                 |           |                 |                                                                                                                                                                                                                                                                                                                                                                                                                                                                                                                                                                                                                                                                                                                                                                                                                                                                                                                                                                                                                     |    |           |           |           |   |           |           |           |   |           |           |          |   |           |           |           |   |           |           |           |   |           |           |           |   |           |           |          |   |           |           |          |   |          |           |           |   |          |           |          |   |          |           |          |   |          |           |           |   |          |           |           |   |          |          |           |   |          |          |          |   |          |          |          |   |          |          |           |   |           |          |          |   |           |          |           |   |          |          |           |   |           |          |          |   |           |          |          |   |           |          |          |   |           |          |           |   |           |          |          |   |           |          |          |   |          |           |           |   |          |          |           |   |          |          |          |   |          |           |          |   |          |           |           |   |          |           |           |   |          |           |           |   |           |           |           |   |           |          |           |   |           |          |           |   |           |          |           |   |           |          |           |   |           |           |           |
| H                                                                                                                                                                                                                                                                                                                                                                                                         | -0.760890                                                                                                                                                                                                                                                                                                                                                                                                                                                                                                                                                                                                                                                                                                                                                                                                                                                                                                                                                                                                                                                                                                                                                                                                                                                                                                                                                                                                                                                                                                                                                                                                                                                                                                                                                                                                                                                                                                                                                                                                                                                                                                                                                                                                                                                                                                                                                                                                                                                                                                                                                                                                                                                                                                                                                                                                                                                                                                                                                                                                                                                                                                                                                                                  | 0.308857       | 1.863791        |                |                                               |                 |           |                 |                                                                                                                                                                                                                                                                                                                                                                                                                                                                                                                                                                                                                                                                                                                                                                                                                                                                                                                                                                                                                     |    |           |           |           |   |           |           |           |   |           |           |          |   |           |           |           |   |           |           |           |   |           |           |           |   |           |           |          |   |           |           |          |   |          |           |           |   |          |           |          |   |          |           |          |   |          |           |           |   |          |           |           |   |          |          |           |   |          |          |          |   |          |          |          |   |          |          |           |   |           |          |          |   |           |          |           |   |          |          |           |   |           |          |          |   |           |          |          |   |           |          |          |   |           |          |           |   |           |          |          |   |           |          |          |   |          |           |           |   |          |          |           |   |          |          |          |   |          |           |          |   |          |           |           |   |          |           |           |   |          |           |           |   |           |           |           |   |           |          |           |   |           |          |           |   |           |          |           |   |           |          |           |   |           |           |           |
| C                                                                                                                                                                                                                                                                                                                                                                                                         | -1.848291                                                                                                                                                                                                                                                                                                                                                                                                                                                                                                                                                                                                                                                                                                                                                                                                                                                                                                                                                                                                                                                                                                                                                                                                                                                                                                                                                                                                                                                                                                                                                                                                                                                                                                                                                                                                                                                                                                                                                                                                                                                                                                                                                                                                                                                                                                                                                                                                                                                                                                                                                                                                                                                                                                                                                                                                                                                                                                                                                                                                                                                                                                                                                                                  | 3.302453       | 0.585404        |                |                                               |                 |           |                 |                                                                                                                                                                                                                                                                                                                                                                                                                                                                                                                                                                                                                                                                                                                                                                                                                                                                                                                                                                                                                     |    |           |           |           |   |           |           |           |   |           |           |          |   |           |           |           |   |           |           |           |   |           |           |           |   |           |           |          |   |           |           |          |   |          |           |           |   |          |           |          |   |          |           |          |   |          |           |           |   |          |           |           |   |          |          |           |   |          |          |          |   |          |          |          |   |          |          |           |   |           |          |          |   |           |          |           |   |          |          |           |   |           |          |          |   |           |          |          |   |           |          |          |   |           |          |           |   |           |          |          |   |           |          |          |   |          |           |           |   |          |          |           |   |          |          |          |   |          |           |          |   |          |           |           |   |          |           |           |   |          |           |           |   |           |           |           |   |           |          |           |   |           |          |           |   |           |          |           |   |           |          |           |   |           |           |           |
| H                                                                                                                                                                                                                                                                                                                                                                                                         | -0.654978                                                                                                                                                                                                                                                                                                                                                                                                                                                                                                                                                                                                                                                                                                                                                                                                                                                                                                                                                                                                                                                                                                                                                                                                                                                                                                                                                                                                                                                                                                                                                                                                                                                                                                                                                                                                                                                                                                                                                                                                                                                                                                                                                                                                                                                                                                                                                                                                                                                                                                                                                                                                                                                                                                                                                                                                                                                                                                                                                                                                                                                                                                                                                                                  | 4.640149       | -0.652983       |                |                                               |                 |           |                 |                                                                                                                                                                                                                                                                                                                                                                                                                                                                                                                                                                                                                                                                                                                                                                                                                                                                                                                                                                                                                     |    |           |           |           |   |           |           |           |   |           |           |          |   |           |           |           |   |           |           |           |   |           |           |           |   |           |           |          |   |           |           |          |   |          |           |           |   |          |           |          |   |          |           |          |   |          |           |           |   |          |           |           |   |          |          |           |   |          |          |          |   |          |          |          |   |          |          |           |   |           |          |          |   |           |          |           |   |          |          |           |   |           |          |          |   |           |          |          |   |           |          |          |   |           |          |           |   |           |          |          |   |           |          |          |   |          |           |           |   |          |          |           |   |          |          |          |   |          |           |          |   |          |           |           |   |          |           |           |   |          |           |           |   |           |           |           |   |           |          |           |   |           |          |           |   |           |          |           |   |           |          |           |   |           |           |           |
| H                                                                                                                                                                                                                                                                                                                                                                                                         | -2.785624                                                                                                                                                                                                                                                                                                                                                                                                                                                                                                                                                                                                                                                                                                                                                                                                                                                                                                                                                                                                                                                                                                                                                                                                                                                                                                                                                                                                                                                                                                                                                                                                                                                                                                                                                                                                                                                                                                                                                                                                                                                                                                                                                                                                                                                                                                                                                                                                                                                                                                                                                                                                                                                                                                                                                                                                                                                                                                                                                                                                                                                                                                                                                                                  | 1.758753       | 1.809631        |                |                                               |                 |           |                 |                                                                                                                                                                                                                                                                                                                                                                                                                                                                                                                                                                                                                                                                                                                                                                                                                                                                                                                                                                                                                     |    |           |           |           |   |           |           |           |   |           |           |          |   |           |           |           |   |           |           |           |   |           |           |           |   |           |           |          |   |           |           |          |   |          |           |           |   |          |           |          |   |          |           |          |   |          |           |           |   |          |           |           |   |          |          |           |   |          |          |          |   |          |          |          |   |          |          |           |   |           |          |          |   |           |          |           |   |          |          |           |   |           |          |          |   |           |          |          |   |           |          |          |   |           |          |           |   |           |          |          |   |           |          |          |   |          |           |           |   |          |          |           |   |          |          |          |   |          |           |          |   |          |           |           |   |          |           |           |   |          |           |           |   |           |           |           |   |           |          |           |   |           |          |           |   |           |          |           |   |           |          |           |   |           |           |           |
| H                                                                                                                                                                                                                                                                                                                                                                                                         | -2.745892                                                                                                                                                                                                                                                                                                                                                                                                                                                                                                                                                                                                                                                                                                                                                                                                                                                                                                                                                                                                                                                                                                                                                                                                                                                                                                                                                                                                                                                                                                                                                                                                                                                                                                                                                                                                                                                                                                                                                                                                                                                                                                                                                                                                                                                                                                                                                                                                                                                                                                                                                                                                                                                                                                                                                                                                                                                                                                                                                                                                                                                                                                                                                                                  | 3.939902       | 0.551579        |                |                                               |                 |           |                 |                                                                                                                                                                                                                                                                                                                                                                                                                                                                                                                                                                                                                                                                                                                                                                                                                                                                                                                                                                                                                     |    |           |           |           |   |           |           |           |   |           |           |          |   |           |           |           |   |           |           |           |   |           |           |           |   |           |           |          |   |           |           |          |   |          |           |           |   |          |           |          |   |          |           |          |   |          |           |           |   |          |           |           |   |          |          |           |   |          |          |          |   |          |          |          |   |          |          |           |   |           |          |          |   |           |          |           |   |          |          |           |   |           |          |          |   |           |          |          |   |           |          |          |   |           |          |           |   |           |          |          |   |           |          |          |   |          |           |           |   |          |          |           |   |          |          |          |   |          |           |          |   |          |           |           |   |          |           |           |   |          |           |           |   |           |           |           |   |           |          |           |   |           |          |           |   |           |          |           |   |           |          |           |   |           |           |           |
| O                                                                                                                                                                                                                                                                                                                                                                                                         | 3.371624                                                                                                                                                                                                                                                                                                                                                                                                                                                                                                                                                                                                                                                                                                                                                                                                                                                                                                                                                                                                                                                                                                                                                                                                                                                                                                                                                                                                                                                                                                                                                                                                                                                                                                                                                                                                                                                                                                                                                                                                                                                                                                                                                                                                                                                                                                                                                                                                                                                                                                                                                                                                                                                                                                                                                                                                                                                                                                                                                                                                                                                                                                                                                                                   | -0.566511      | -0.440013       |                |                                               |                 |           |                 |                                                                                                                                                                                                                                                                                                                                                                                                                                                                                                                                                                                                                                                                                                                                                                                                                                                                                                                                                                                                                     |    |           |           |           |   |           |           |           |   |           |           |          |   |           |           |           |   |           |           |           |   |           |           |           |   |           |           |          |   |           |           |          |   |          |           |           |   |          |           |          |   |          |           |          |   |          |           |           |   |          |           |           |   |          |          |           |   |          |          |          |   |          |          |          |   |          |          |           |   |           |          |          |   |           |          |           |   |          |          |           |   |           |          |          |   |           |          |          |   |           |          |          |   |           |          |           |   |           |          |          |   |           |          |          |   |          |           |           |   |          |          |           |   |          |          |          |   |          |           |          |   |          |           |           |   |          |           |           |   |          |           |           |   |           |           |           |   |           |          |           |   |           |          |           |   |           |          |           |   |           |          |           |   |           |           |           |
| O                                                                                                                                                                                                                                                                                                                                                                                                         | 2.376760                                                                                                                                                                                                                                                                                                                                                                                                                                                                                                                                                                                                                                                                                                                                                                                                                                                                                                                                                                                                                                                                                                                                                                                                                                                                                                                                                                                                                                                                                                                                                                                                                                                                                                                                                                                                                                                                                                                                                                                                                                                                                                                                                                                                                                                                                                                                                                                                                                                                                                                                                                                                                                                                                                                                                                                                                                                                                                                                                                                                                                                                                                                                                                                   | 1.113891       | -1.527616       |                |                                               |                 |           |                 |                                                                                                                                                                                                                                                                                                                                                                                                                                                                                                                                                                                                                                                                                                                                                                                                                                                                                                                                                                                                                     |    |           |           |           |   |           |           |           |   |           |           |          |   |           |           |           |   |           |           |           |   |           |           |           |   |           |           |          |   |           |           |          |   |          |           |           |   |          |           |          |   |          |           |          |   |          |           |           |   |          |           |           |   |          |          |           |   |          |          |          |   |          |          |          |   |          |          |           |   |           |          |          |   |           |          |           |   |          |          |           |   |           |          |          |   |           |          |          |   |           |          |          |   |           |          |           |   |           |          |          |   |           |          |          |   |          |           |           |   |          |          |           |   |          |          |          |   |          |           |          |   |          |           |           |   |          |           |           |   |          |           |           |   |           |           |           |   |           |          |           |   |           |          |           |   |           |          |           |   |           |          |           |   |           |           |           |
| N                                                                                                                                                                                                                                                                                                                                                                                                         | 1.973210                                                                                                                                                                                                                                                                                                                                                                                                                                                                                                                                                                                                                                                                                                                                                                                                                                                                                                                                                                                                                                                                                                                                                                                                                                                                                                                                                                                                                                                                                                                                                                                                                                                                                                                                                                                                                                                                                                                                                                                                                                                                                                                                                                                                                                                                                                                                                                                                                                                                                                                                                                                                                                                                                                                                                                                                                                                                                                                                                                                                                                                                                                                                                                                   | 0.253468       | 1.857568        |                |                                               |                 |           |                 |                                                                                                                                                                                                                                                                                                                                                                                                                                                                                                                                                                                                                                                                                                                                                                                                                                                                                                                                                                                                                     |    |           |           |           |   |           |           |           |   |           |           |          |   |           |           |           |   |           |           |           |   |           |           |           |   |           |           |          |   |           |           |          |   |          |           |           |   |          |           |          |   |          |           |          |   |          |           |           |   |          |           |           |   |          |          |           |   |          |          |          |   |          |          |          |   |          |          |           |   |           |          |          |   |           |          |           |   |          |          |           |   |           |          |          |   |           |          |          |   |           |          |          |   |           |          |           |   |           |          |          |   |           |          |          |   |          |           |           |   |          |          |           |   |          |          |          |   |          |           |          |   |          |           |           |   |          |           |           |   |          |           |           |   |           |           |           |   |           |          |           |   |           |          |           |   |           |          |           |   |           |          |           |   |           |           |           |
| N                                                                                                                                                                                                                                                                                                                                                                                                         | 2.261749                                                                                                                                                                                                                                                                                                                                                                                                                                                                                                                                                                                                                                                                                                                                                                                                                                                                                                                                                                                                                                                                                                                                                                                                                                                                                                                                                                                                                                                                                                                                                                                                                                                                                                                                                                                                                                                                                                                                                                                                                                                                                                                                                                                                                                                                                                                                                                                                                                                                                                                                                                                                                                                                                                                                                                                                                                                                                                                                                                                                                                                                                                                                                                                   | -0.213435      | 2.868881        |                |                                               |                 |           |                 |                                                                                                                                                                                                                                                                                                                                                                                                                                                                                                                                                                                                                                                                                                                                                                                                                                                                                                                                                                                                                     |    |           |           |           |   |           |           |           |   |           |           |          |   |           |           |           |   |           |           |           |   |           |           |           |   |           |           |          |   |           |           |          |   |          |           |           |   |          |           |          |   |          |           |          |   |          |           |           |   |          |           |           |   |          |          |           |   |          |          |          |   |          |          |          |   |          |          |           |   |           |          |          |   |           |          |           |   |          |          |           |   |           |          |          |   |           |          |          |   |           |          |          |   |           |          |           |   |           |          |          |   |           |          |          |   |          |           |           |   |          |          |           |   |          |          |          |   |          |           |          |   |          |           |           |   |          |           |           |   |          |           |           |   |           |           |           |   |           |          |           |   |           |          |           |   |           |          |           |   |           |          |           |   |           |           |           |
| C                                                                                                                                                                                                                                                                                                                                                                                                         | 0.184546                                                                                                                                                                                                                                                                                                                                                                                                                                                                                                                                                                                                                                                                                                                                                                                                                                                                                                                                                                                                                                                                                                                                                                                                                                                                                                                                                                                                                                                                                                                                                                                                                                                                                                                                                                                                                                                                                                                                                                                                                                                                                                                                                                                                                                                                                                                                                                                                                                                                                                                                                                                                                                                                                                                                                                                                                                                                                                                                                                                                                                                                                                                                                                                   | -1.227757      | -2.656692       |                |                                               |                 |           |                 |                                                                                                                                                                                                                                                                                                                                                                                                                                                                                                                                                                                                                                                                                                                                                                                                                                                                                                                                                                                                                     |    |           |           |           |   |           |           |           |   |           |           |          |   |           |           |           |   |           |           |           |   |           |           |           |   |           |           |          |   |           |           |          |   |          |           |           |   |          |           |          |   |          |           |          |   |          |           |           |   |          |           |           |   |          |          |           |   |          |          |          |   |          |          |          |   |          |          |           |   |           |          |          |   |           |          |           |   |          |          |           |   |           |          |          |   |           |          |          |   |           |          |          |   |           |          |           |   |           |          |          |   |           |          |          |   |          |           |           |   |          |          |           |   |          |          |          |   |          |           |          |   |          |           |           |   |          |           |           |   |          |           |           |   |           |           |           |   |           |          |           |   |           |          |           |   |           |          |           |   |           |          |           |   |           |           |           |
| H                                                                                                                                                                                                                                                                                                                                                                                                         | 1.191628                                                                                                                                                                                                                                                                                                                                                                                                                                                                                                                                                                                                                                                                                                                                                                                                                                                                                                                                                                                                                                                                                                                                                                                                                                                                                                                                                                                                                                                                                                                                                                                                                                                                                                                                                                                                                                                                                                                                                                                                                                                                                                                                                                                                                                                                                                                                                                                                                                                                                                                                                                                                                                                                                                                                                                                                                                                                                                                                                                                                                                                                                                                                                                                   | -0.762840      | -2.718362       |                |                                               |                 |           |                 |                                                                                                                                                                                                                                                                                                                                                                                                                                                                                                                                                                                                                                                                                                                                                                                                                                                                                                                                                                                                                     |    |           |           |           |   |           |           |           |   |           |           |          |   |           |           |           |   |           |           |           |   |           |           |           |   |           |           |          |   |           |           |          |   |          |           |           |   |          |           |          |   |          |           |          |   |          |           |           |   |          |           |           |   |          |          |           |   |          |          |          |   |          |          |          |   |          |          |           |   |           |          |          |   |           |          |           |   |          |          |           |   |           |          |          |   |           |          |          |   |           |          |          |   |           |          |           |   |           |          |          |   |           |          |          |   |          |           |           |   |          |          |           |   |          |          |          |   |          |           |          |   |          |           |           |   |          |           |           |   |          |           |           |   |           |           |           |   |           |          |           |   |           |          |           |   |           |          |           |   |           |          |           |   |           |           |           |
| H                                                                                                                                                                                                                                                                                                                                                                                                         | 0.298302                                                                                                                                                                                                                                                                                                                                                                                                                                                                                                                                                                                                                                                                                                                                                                                                                                                                                                                                                                                                                                                                                                                                                                                                                                                                                                                                                                                                                                                                                                                                                                                                                                                                                                                                                                                                                                                                                                                                                                                                                                                                                                                                                                                                                                                                                                                                                                                                                                                                                                                                                                                                                                                                                                                                                                                                                                                                                                                                                                                                                                                                                                                                                                                   | -2.264398      | -2.295781       |                |                                               |                 |           |                 |                                                                                                                                                                                                                                                                                                                                                                                                                                                                                                                                                                                                                                                                                                                                                                                                                                                                                                                                                                                                                     |    |           |           |           |   |           |           |           |   |           |           |          |   |           |           |           |   |           |           |           |   |           |           |           |   |           |           |          |   |           |           |          |   |          |           |           |   |          |           |          |   |          |           |          |   |          |           |           |   |          |           |           |   |          |          |           |   |          |          |          |   |          |          |          |   |          |          |           |   |           |          |          |   |           |          |           |   |          |          |           |   |           |          |          |   |           |          |          |   |           |          |          |   |           |          |           |   |           |          |          |   |           |          |          |   |          |           |           |   |          |          |           |   |          |          |          |   |          |           |          |   |          |           |           |   |          |           |           |   |          |           |           |   |           |           |           |   |           |          |           |   |           |          |           |   |           |          |           |   |           |          |           |   |           |           |           |
| H                                                                                                                                                                                                                                                                                                                                                                                                         | -0.247015                                                                                                                                                                                                                                                                                                                                                                                                                                                                                                                                                                                                                                                                                                                                                                                                                                                                                                                                                                                                                                                                                                                                                                                                                                                                                                                                                                                                                                                                                                                                                                                                                                                                                                                                                                                                                                                                                                                                                                                                                                                                                                                                                                                                                                                                                                                                                                                                                                                                                                                                                                                                                                                                                                                                                                                                                                                                                                                                                                                                                                                                                                                                                                                  | -1.268879      | -3.686165       |                |                                               |                 |           |                 |                                                                                                                                                                                                                                                                                                                                                                                                                                                                                                                                                                                                                                                                                                                                                                                                                                                                                                                                                                                                                     |    |           |           |           |   |           |           |           |   |           |           |          |   |           |           |           |   |           |           |           |   |           |           |           |   |           |           |          |   |           |           |          |   |          |           |           |   |          |           |          |   |          |           |          |   |          |           |           |   |          |           |           |   |          |          |           |   |          |          |          |   |          |          |          |   |          |          |           |   |           |          |          |   |           |          |           |   |          |          |           |   |           |          |          |   |           |          |          |   |           |          |          |   |           |          |           |   |           |          |          |   |           |          |          |   |          |           |           |   |          |          |           |   |          |          |          |   |          |           |          |   |          |           |           |   |          |           |           |   |          |           |           |   |           |           |           |   |           |          |           |   |           |          |           |   |           |          |           |   |           |          |           |   |           |           |           |
| C                                                                                                                                                                                                                                                                                                                                                                                                         | -1.073855                                                                                                                                                                                                                                                                                                                                                                                                                                                                                                                                                                                                                                                                                                                                                                                                                                                                                                                                                                                                                                                                                                                                                                                                                                                                                                                                                                                                                                                                                                                                                                                                                                                                                                                                                                                                                                                                                                                                                                                                                                                                                                                                                                                                                                                                                                                                                                                                                                                                                                                                                                                                                                                                                                                                                                                                                                                                                                                                                                                                                                                                                                                                                                                  | 0.833095       | -2.331676       |                |                                               |                 |           |                 |                                                                                                                                                                                                                                                                                                                                                                                                                                                                                                                                                                                                                                                                                                                                                                                                                                                                                                                                                                                                                     |    |           |           |           |   |           |           |           |   |           |           |          |   |           |           |           |   |           |           |           |   |           |           |           |   |           |           |          |   |           |           |          |   |          |           |           |   |          |           |          |   |          |           |          |   |          |           |           |   |          |           |           |   |          |          |           |   |          |          |          |   |          |          |          |   |          |          |           |   |           |          |          |   |           |          |           |   |          |          |           |   |           |          |          |   |           |          |          |   |           |          |          |   |           |          |           |   |           |          |          |   |           |          |          |   |          |           |           |   |          |          |           |   |          |          |          |   |          |           |          |   |          |           |           |   |          |           |           |   |          |           |           |   |           |           |           |   |           |          |           |   |           |          |           |   |           |          |           |   |           |          |           |   |           |           |           |
| H                                                                                                                                                                                                                                                                                                                                                                                                         | -1.768418                                                                                                                                                                                                                                                                                                                                                                                                                                                                                                                                                                                                                                                                                                                                                                                                                                                                                                                                                                                                                                                                                                                                                                                                                                                                                                                                                                                                                                                                                                                                                                                                                                                                                                                                                                                                                                                                                                                                                                                                                                                                                                                                                                                                                                                                                                                                                                                                                                                                                                                                                                                                                                                                                                                                                                                                                                                                                                                                                                                                                                                                                                                                                                                  | 0.747203       | -3.205237       |                |                                               |                 |           |                 |                                                                                                                                                                                                                                                                                                                                                                                                                                                                                                                                                                                                                                                                                                                                                                                                                                                                                                                                                                                                                     |    |           |           |           |   |           |           |           |   |           |           |          |   |           |           |           |   |           |           |           |   |           |           |           |   |           |           |          |   |           |           |          |   |          |           |           |   |          |           |          |   |          |           |          |   |          |           |           |   |          |           |           |   |          |          |           |   |          |          |          |   |          |          |          |   |          |          |           |   |           |          |          |   |           |          |           |   |          |          |           |   |           |          |          |   |           |          |          |   |           |          |          |   |           |          |           |   |           |          |          |   |           |          |          |   |          |           |           |   |          |          |           |   |          |          |          |   |          |           |          |   |          |           |           |   |          |           |           |   |          |           |           |   |           |           |           |   |           |          |           |   |           |          |           |   |           |          |           |   |           |          |           |   |           |           |           |
| H                                                                                                                                                                                                                                                                                                                                                                                                         | -1.545318                                                                                                                                                                                                                                                                                                                                                                                                                                                                                                                                                                                                                                                                                                                                                                                                                                                                                                                                                                                                                                                                                                                                                                                                                                                                                                                                                                                                                                                                                                                                                                                                                                                                                                                                                                                                                                                                                                                                                                                                                                                                                                                                                                                                                                                                                                                                                                                                                                                                                                                                                                                                                                                                                                                                                                                                                                                                                                                                                                                                                                                                                                                                                                                  | 1.464246       | -1.555382       |                |                                               |                 |           |                 |                                                                                                                                                                                                                                                                                                                                                                                                                                                                                                                                                                                                                                                                                                                                                                                                                                                                                                                                                                                                                     |    |           |           |           |   |           |           |           |   |           |           |          |   |           |           |           |   |           |           |           |   |           |           |           |   |           |           |          |   |           |           |          |   |          |           |           |   |          |           |          |   |          |           |          |   |          |           |           |   |          |           |           |   |          |          |           |   |          |          |          |   |          |          |          |   |          |          |           |   |           |          |          |   |           |          |           |   |          |          |           |   |           |          |          |   |           |          |          |   |           |          |          |   |           |          |           |   |           |          |          |   |           |          |          |   |          |           |           |   |          |          |           |   |          |          |          |   |          |           |          |   |          |           |           |   |          |           |           |   |          |           |           |   |           |           |           |   |           |          |           |   |           |          |           |   |           |          |           |   |           |          |           |   |           |           |           |
| H                                                                                                                                                                                                                                                                                                                                                                                                         | -0.152878                                                                                                                                                                                                                                                                                                                                                                                                                                                                                                                                                                                                                                                                                                                                                                                                                                                                                                                                                                                                                                                                                                                                                                                                                                                                                                                                                                                                                                                                                                                                                                                                                                                                                                                                                                                                                                                                                                                                                                                                                                                                                                                                                                                                                                                                                                                                                                                                                                                                                                                                                                                                                                                                                                                                                                                                                                                                                                                                                                                                                                                                                                                                                                                  | 1.354563       | -2.664717       |                |                                               |                 |           |                 |                                                                                                                                                                                                                                                                                                                                                                                                                                                                                                                                                                                                                                                                                                                                                                                                                                                                                                                                                                                                                     |    |           |           |           |   |           |           |           |   |           |           |          |   |           |           |           |   |           |           |           |   |           |           |           |   |           |           |          |   |           |           |          |   |          |           |           |   |          |           |          |   |          |           |          |   |          |           |           |   |          |           |           |   |          |          |           |   |          |          |          |   |          |          |          |   |          |          |           |   |           |          |          |   |           |          |           |   |          |          |           |   |           |          |          |   |           |          |          |   |           |          |          |   |           |          |           |   |           |          |          |   |           |          |          |   |          |           |           |   |          |          |           |   |          |          |          |   |          |           |          |   |          |           |           |   |          |           |           |   |          |           |           |   |           |           |           |   |           |          |           |   |           |          |           |   |           |          |           |   |           |          |           |   |           |           |           |
| N                                                                                                                                                                                                                                                                                                                                                                                                         | -0.692106                                                                                                                                                                                                                                                                                                                                                                                                                                                                                                                                                                                                                                                                                                                                                                                                                                                                                                                                                                                                                                                                                                                                                                                                                                                                                                                                                                                                                                                                                                                                                                                                                                                                                                                                                                                                                                                                                                                                                                                                                                                                                                                                                                                                                                                                                                                                                                                                                                                                                                                                                                                                                                                                                                                                                                                                                                                                                                                                                                                                                                                                                                                                                                                  | -0.455002      | -1.778539       |                |                                               |                 |           |                 |                                                                                                                                                                                                                                                                                                                                                                                                                                                                                                                                                                                                                                                                                                                                                                                                                                                                                                                                                                                                                     |    |           |           |           |   |           |           |           |   |           |           |          |   |           |           |           |   |           |           |           |   |           |           |           |   |           |           |          |   |           |           |          |   |          |           |           |   |          |           |          |   |          |           |          |   |          |           |           |   |          |           |           |   |          |          |           |   |          |          |          |   |          |          |          |   |          |          |           |   |           |          |          |   |           |          |           |   |          |          |           |   |           |          |          |   |           |          |          |   |           |          |          |   |           |          |           |   |           |          |          |   |           |          |          |   |          |           |           |   |          |          |           |   |          |          |          |   |          |           |          |   |          |           |           |   |          |           |           |   |          |           |           |   |           |           |           |   |           |          |           |   |           |          |           |   |           |          |           |   |           |          |           |   |           |           |           |
| <br><table border="1" data-bbox="247 1859 582 1982"> <thead> <tr> <th></th> <th>R<sup>3</sup></th> <th>R<sup>2</sup></th> <th>R<sup>1</sup></th> </tr> </thead> <tbody> <tr> <td>Tp<sup>(CF<sub>3</sub>)<sub>2</sub>,Br</sup></td> <td>CF<sub>3</sub></td> <td>Br</td> <td>CF<sub>3</sub></td> </tr> </tbody> </table> |                                                                                                                                                                                                                                                                                                                                                                                                                                                                                                                                                                                                                                                                                                                                                                                                                                                                                                                                                                                                                                                                                                                                                                                                                                                                                                                                                                                                                                                                                                                                                                                                                                                                                                                                                                                                                                                                                                                                                                                                                                                                                                                                                                                                                                                                                                                                                                                                                                                                                                                                                                                                                                                                                                                                                                                                                                                                                                                                                                                                                                                                                                                                                                                            | R <sup>3</sup> | R <sup>2</sup>  | R <sup>1</sup> | Tp <sup>(CF<sub>3</sub>)<sub>2</sub>,Br</sup> | CF <sub>3</sub> | Br        | CF <sub>3</sub> | <p>45<br/>TpCF<sub>3</sub>BrAg SCF Done: -10590.3609159 A.U.</p> <table border="0"> <tbody> <tr><td>Ag</td><td>-0.000321</td><td>-0.000219</td><td>-2.243122</td></tr> <tr><td>N</td><td>0.111417</td><td>1.795079</td><td>-0.751518</td></tr> <tr><td>N</td><td>0.383281</td><td>1.424890</td><td>0.517694</td></tr> <tr><td>N</td><td>1.498804</td><td>-0.994361</td><td>-0.751358</td></tr> <tr><td>N</td><td>1.041989</td><td>-1.044926</td><td>0.517750</td></tr> <tr><td>N</td><td>-1.610978</td><td>-0.801473</td><td>-0.751285</td></tr> <tr><td>N</td><td>-1.426378</td><td>-0.380445</td><td>0.517780</td></tr> <tr><td>B</td><td>-0.000402</td><td>-0.000124</td><td>1.043779</td></tr> <tr><td>C</td><td>0.583934</td><td>3.037701</td><td>-0.925021</td></tr> <tr><td>C</td><td>1.176679</td><td>3.508280</td><td>0.275112</td></tr> <tr><td>C</td><td>1.036196</td><td>2.436063</td><td>1.175036</td></tr> <tr><td>C</td><td>2.339330</td><td>-2.024407</td><td>-0.924644</td></tr> </tbody> </table> | Ag | -0.000321 | -0.000219 | -2.243122 | N | 0.111417  | 1.795079  | -0.751518 | N | 0.383281  | 1.424890  | 0.517694 | N | 1.498804  | -0.994361 | -0.751358 | N | 1.041989  | -1.044926 | 0.517750  | N | -1.610978 | -0.801473 | -0.751285 | N | -1.426378 | -0.380445 | 0.517780 | B | -0.000402 | -0.000124 | 1.043779 | C | 0.583934 | 3.037701  | -0.925021 | C | 1.176679 | 3.508280  | 0.275112 | C | 1.036196 | 2.436063  | 1.175036 | C | 2.339330 | -2.024407 | -0.924644 |   |          |           |           |   |          |          |           |   |          |          |          |   |          |          |          |   |          |          |           |   |           |          |          |   |           |          |           |   |          |          |           |   |           |          |          |   |           |          |          |   |           |          |          |   |           |          |           |   |           |          |          |   |           |          |          |   |          |           |           |   |          |          |           |   |          |          |          |   |          |           |          |   |          |           |           |   |          |           |           |   |          |           |           |   |           |           |           |   |           |          |           |   |           |          |           |   |           |          |           |   |           |          |           |   |           |           |           |
|                                                                                                                                                                                                                                                                                                                                                                                                           | R <sup>3</sup>                                                                                                                                                                                                                                                                                                                                                                                                                                                                                                                                                                                                                                                                                                                                                                                                                                                                                                                                                                                                                                                                                                                                                                                                                                                                                                                                                                                                                                                                                                                                                                                                                                                                                                                                                                                                                                                                                                                                                                                                                                                                                                                                                                                                                                                                                                                                                                                                                                                                                                                                                                                                                                                                                                                                                                                                                                                                                                                                                                                                                                                                                                                                                                             | R <sup>2</sup> | R <sup>1</sup>  |                |                                               |                 |           |                 |                                                                                                                                                                                                                                                                                                                                                                                                                                                                                                                                                                                                                                                                                                                                                                                                                                                                                                                                                                                                                     |    |           |           |           |   |           |           |           |   |           |           |          |   |           |           |           |   |           |           |           |   |           |           |           |   |           |           |          |   |           |           |          |   |          |           |           |   |          |           |          |   |          |           |          |   |          |           |           |   |          |           |           |   |          |          |           |   |          |          |          |   |          |          |          |   |          |          |           |   |           |          |          |   |           |          |           |   |          |          |           |   |           |          |          |   |           |          |          |   |           |          |          |   |           |          |           |   |           |          |          |   |           |          |          |   |          |           |           |   |          |          |           |   |          |          |          |   |          |           |          |   |          |           |           |   |          |           |           |   |          |           |           |   |           |           |           |   |           |          |           |   |           |          |           |   |           |          |           |   |           |          |           |   |           |           |           |
| Tp <sup>(CF<sub>3</sub>)<sub>2</sub>,Br</sup>                                                                                                                                                                                                                                                                                                                                                             | CF <sub>3</sub>                                                                                                                                                                                                                                                                                                                                                                                                                                                                                                                                                                                                                                                                                                                                                                                                                                                                                                                                                                                                                                                                                                                                                                                                                                                                                                                                                                                                                                                                                                                                                                                                                                                                                                                                                                                                                                                                                                                                                                                                                                                                                                                                                                                                                                                                                                                                                                                                                                                                                                                                                                                                                                                                                                                                                                                                                                                                                                                                                                                                                                                                                                                                                                            | Br             | CF <sub>3</sub> |                |                                               |                 |           |                 |                                                                                                                                                                                                                                                                                                                                                                                                                                                                                                                                                                                                                                                                                                                                                                                                                                                                                                                                                                                                                     |    |           |           |           |   |           |           |           |   |           |           |          |   |           |           |           |   |           |           |           |   |           |           |           |   |           |           |          |   |           |           |          |   |          |           |           |   |          |           |          |   |          |           |          |   |          |           |           |   |          |           |           |   |          |          |           |   |          |          |          |   |          |          |          |   |          |          |           |   |           |          |          |   |           |          |           |   |          |          |           |   |           |          |          |   |           |          |          |   |           |          |          |   |           |          |           |   |           |          |          |   |           |          |          |   |          |           |           |   |          |          |           |   |          |          |          |   |          |           |          |   |          |           |           |   |          |           |           |   |          |           |           |   |           |           |           |   |           |          |           |   |           |          |           |   |           |          |           |   |           |          |           |   |           |           |           |
| Ag                                                                                                                                                                                                                                                                                                                                                                                                        | -0.000321                                                                                                                                                                                                                                                                                                                                                                                                                                                                                                                                                                                                                                                                                                                                                                                                                                                                                                                                                                                                                                                                                                                                                                                                                                                                                                                                                                                                                                                                                                                                                                                                                                                                                                                                                                                                                                                                                                                                                                                                                                                                                                                                                                                                                                                                                                                                                                                                                                                                                                                                                                                                                                                                                                                                                                                                                                                                                                                                                                                                                                                                                                                                                                                  | -0.000219      | -2.243122       |                |                                               |                 |           |                 |                                                                                                                                                                                                                                                                                                                                                                                                                                                                                                                                                                                                                                                                                                                                                                                                                                                                                                                                                                                                                     |    |           |           |           |   |           |           |           |   |           |           |          |   |           |           |           |   |           |           |           |   |           |           |           |   |           |           |          |   |           |           |          |   |          |           |           |   |          |           |          |   |          |           |          |   |          |           |           |   |          |           |           |   |          |          |           |   |          |          |          |   |          |          |          |   |          |          |           |   |           |          |          |   |           |          |           |   |          |          |           |   |           |          |          |   |           |          |          |   |           |          |          |   |           |          |           |   |           |          |          |   |           |          |          |   |          |           |           |   |          |          |           |   |          |          |          |   |          |           |          |   |          |           |           |   |          |           |           |   |          |           |           |   |           |           |           |   |           |          |           |   |           |          |           |   |           |          |           |   |           |          |           |   |           |           |           |
| N                                                                                                                                                                                                                                                                                                                                                                                                         | 0.111417                                                                                                                                                                                                                                                                                                                                                                                                                                                                                                                                                                                                                                                                                                                                                                                                                                                                                                                                                                                                                                                                                                                                                                                                                                                                                                                                                                                                                                                                                                                                                                                                                                                                                                                                                                                                                                                                                                                                                                                                                                                                                                                                                                                                                                                                                                                                                                                                                                                                                                                                                                                                                                                                                                                                                                                                                                                                                                                                                                                                                                                                                                                                                                                   | 1.795079       | -0.751518       |                |                                               |                 |           |                 |                                                                                                                                                                                                                                                                                                                                                                                                                                                                                                                                                                                                                                                                                                                                                                                                                                                                                                                                                                                                                     |    |           |           |           |   |           |           |           |   |           |           |          |   |           |           |           |   |           |           |           |   |           |           |           |   |           |           |          |   |           |           |          |   |          |           |           |   |          |           |          |   |          |           |          |   |          |           |           |   |          |           |           |   |          |          |           |   |          |          |          |   |          |          |          |   |          |          |           |   |           |          |          |   |           |          |           |   |          |          |           |   |           |          |          |   |           |          |          |   |           |          |          |   |           |          |           |   |           |          |          |   |           |          |          |   |          |           |           |   |          |          |           |   |          |          |          |   |          |           |          |   |          |           |           |   |          |           |           |   |          |           |           |   |           |           |           |   |           |          |           |   |           |          |           |   |           |          |           |   |           |          |           |   |           |           |           |
| N                                                                                                                                                                                                                                                                                                                                                                                                         | 0.383281                                                                                                                                                                                                                                                                                                                                                                                                                                                                                                                                                                                                                                                                                                                                                                                                                                                                                                                                                                                                                                                                                                                                                                                                                                                                                                                                                                                                                                                                                                                                                                                                                                                                                                                                                                                                                                                                                                                                                                                                                                                                                                                                                                                                                                                                                                                                                                                                                                                                                                                                                                                                                                                                                                                                                                                                                                                                                                                                                                                                                                                                                                                                                                                   | 1.424890       | 0.517694        |                |                                               |                 |           |                 |                                                                                                                                                                                                                                                                                                                                                                                                                                                                                                                                                                                                                                                                                                                                                                                                                                                                                                                                                                                                                     |    |           |           |           |   |           |           |           |   |           |           |          |   |           |           |           |   |           |           |           |   |           |           |           |   |           |           |          |   |           |           |          |   |          |           |           |   |          |           |          |   |          |           |          |   |          |           |           |   |          |           |           |   |          |          |           |   |          |          |          |   |          |          |          |   |          |          |           |   |           |          |          |   |           |          |           |   |          |          |           |   |           |          |          |   |           |          |          |   |           |          |          |   |           |          |           |   |           |          |          |   |           |          |          |   |          |           |           |   |          |          |           |   |          |          |          |   |          |           |          |   |          |           |           |   |          |           |           |   |          |           |           |   |           |           |           |   |           |          |           |   |           |          |           |   |           |          |           |   |           |          |           |   |           |           |           |
| N                                                                                                                                                                                                                                                                                                                                                                                                         | 1.498804                                                                                                                                                                                                                                                                                                                                                                                                                                                                                                                                                                                                                                                                                                                                                                                                                                                                                                                                                                                                                                                                                                                                                                                                                                                                                                                                                                                                                                                                                                                                                                                                                                                                                                                                                                                                                                                                                                                                                                                                                                                                                                                                                                                                                                                                                                                                                                                                                                                                                                                                                                                                                                                                                                                                                                                                                                                                                                                                                                                                                                                                                                                                                                                   | -0.994361      | -0.751358       |                |                                               |                 |           |                 |                                                                                                                                                                                                                                                                                                                                                                                                                                                                                                                                                                                                                                                                                                                                                                                                                                                                                                                                                                                                                     |    |           |           |           |   |           |           |           |   |           |           |          |   |           |           |           |   |           |           |           |   |           |           |           |   |           |           |          |   |           |           |          |   |          |           |           |   |          |           |          |   |          |           |          |   |          |           |           |   |          |           |           |   |          |          |           |   |          |          |          |   |          |          |          |   |          |          |           |   |           |          |          |   |           |          |           |   |          |          |           |   |           |          |          |   |           |          |          |   |           |          |          |   |           |          |           |   |           |          |          |   |           |          |          |   |          |           |           |   |          |          |           |   |          |          |          |   |          |           |          |   |          |           |           |   |          |           |           |   |          |           |           |   |           |           |           |   |           |          |           |   |           |          |           |   |           |          |           |   |           |          |           |   |           |           |           |
| N                                                                                                                                                                                                                                                                                                                                                                                                         | 1.041989                                                                                                                                                                                                                                                                                                                                                                                                                                                                                                                                                                                                                                                                                                                                                                                                                                                                                                                                                                                                                                                                                                                                                                                                                                                                                                                                                                                                                                                                                                                                                                                                                                                                                                                                                                                                                                                                                                                                                                                                                                                                                                                                                                                                                                                                                                                                                                                                                                                                                                                                                                                                                                                                                                                                                                                                                                                                                                                                                                                                                                                                                                                                                                                   | -1.044926      | 0.517750        |                |                                               |                 |           |                 |                                                                                                                                                                                                                                                                                                                                                                                                                                                                                                                                                                                                                                                                                                                                                                                                                                                                                                                                                                                                                     |    |           |           |           |   |           |           |           |   |           |           |          |   |           |           |           |   |           |           |           |   |           |           |           |   |           |           |          |   |           |           |          |   |          |           |           |   |          |           |          |   |          |           |          |   |          |           |           |   |          |           |           |   |          |          |           |   |          |          |          |   |          |          |          |   |          |          |           |   |           |          |          |   |           |          |           |   |          |          |           |   |           |          |          |   |           |          |          |   |           |          |          |   |           |          |           |   |           |          |          |   |           |          |          |   |          |           |           |   |          |          |           |   |          |          |          |   |          |           |          |   |          |           |           |   |          |           |           |   |          |           |           |   |           |           |           |   |           |          |           |   |           |          |           |   |           |          |           |   |           |          |           |   |           |           |           |
| N                                                                                                                                                                                                                                                                                                                                                                                                         | -1.610978                                                                                                                                                                                                                                                                                                                                                                                                                                                                                                                                                                                                                                                                                                                                                                                                                                                                                                                                                                                                                                                                                                                                                                                                                                                                                                                                                                                                                                                                                                                                                                                                                                                                                                                                                                                                                                                                                                                                                                                                                                                                                                                                                                                                                                                                                                                                                                                                                                                                                                                                                                                                                                                                                                                                                                                                                                                                                                                                                                                                                                                                                                                                                                                  | -0.801473      | -0.751285       |                |                                               |                 |           |                 |                                                                                                                                                                                                                                                                                                                                                                                                                                                                                                                                                                                                                                                                                                                                                                                                                                                                                                                                                                                                                     |    |           |           |           |   |           |           |           |   |           |           |          |   |           |           |           |   |           |           |           |   |           |           |           |   |           |           |          |   |           |           |          |   |          |           |           |   |          |           |          |   |          |           |          |   |          |           |           |   |          |           |           |   |          |          |           |   |          |          |          |   |          |          |          |   |          |          |           |   |           |          |          |   |           |          |           |   |          |          |           |   |           |          |          |   |           |          |          |   |           |          |          |   |           |          |           |   |           |          |          |   |           |          |          |   |          |           |           |   |          |          |           |   |          |          |          |   |          |           |          |   |          |           |           |   |          |           |           |   |          |           |           |   |           |           |           |   |           |          |           |   |           |          |           |   |           |          |           |   |           |          |           |   |           |           |           |
| N                                                                                                                                                                                                                                                                                                                                                                                                         | -1.426378                                                                                                                                                                                                                                                                                                                                                                                                                                                                                                                                                                                                                                                                                                                                                                                                                                                                                                                                                                                                                                                                                                                                                                                                                                                                                                                                                                                                                                                                                                                                                                                                                                                                                                                                                                                                                                                                                                                                                                                                                                                                                                                                                                                                                                                                                                                                                                                                                                                                                                                                                                                                                                                                                                                                                                                                                                                                                                                                                                                                                                                                                                                                                                                  | -0.380445      | 0.517780        |                |                                               |                 |           |                 |                                                                                                                                                                                                                                                                                                                                                                                                                                                                                                                                                                                                                                                                                                                                                                                                                                                                                                                                                                                                                     |    |           |           |           |   |           |           |           |   |           |           |          |   |           |           |           |   |           |           |           |   |           |           |           |   |           |           |          |   |           |           |          |   |          |           |           |   |          |           |          |   |          |           |          |   |          |           |           |   |          |           |           |   |          |          |           |   |          |          |          |   |          |          |          |   |          |          |           |   |           |          |          |   |           |          |           |   |          |          |           |   |           |          |          |   |           |          |          |   |           |          |          |   |           |          |           |   |           |          |          |   |           |          |          |   |          |           |           |   |          |          |           |   |          |          |          |   |          |           |          |   |          |           |           |   |          |           |           |   |          |           |           |   |           |           |           |   |           |          |           |   |           |          |           |   |           |          |           |   |           |          |           |   |           |           |           |
| B                                                                                                                                                                                                                                                                                                                                                                                                         | -0.000402                                                                                                                                                                                                                                                                                                                                                                                                                                                                                                                                                                                                                                                                                                                                                                                                                                                                                                                                                                                                                                                                                                                                                                                                                                                                                                                                                                                                                                                                                                                                                                                                                                                                                                                                                                                                                                                                                                                                                                                                                                                                                                                                                                                                                                                                                                                                                                                                                                                                                                                                                                                                                                                                                                                                                                                                                                                                                                                                                                                                                                                                                                                                                                                  | -0.000124      | 1.043779        |                |                                               |                 |           |                 |                                                                                                                                                                                                                                                                                                                                                                                                                                                                                                                                                                                                                                                                                                                                                                                                                                                                                                                                                                                                                     |    |           |           |           |   |           |           |           |   |           |           |          |   |           |           |           |   |           |           |           |   |           |           |           |   |           |           |          |   |           |           |          |   |          |           |           |   |          |           |          |   |          |           |          |   |          |           |           |   |          |           |           |   |          |          |           |   |          |          |          |   |          |          |          |   |          |          |           |   |           |          |          |   |           |          |           |   |          |          |           |   |           |          |          |   |           |          |          |   |           |          |          |   |           |          |           |   |           |          |          |   |           |          |          |   |          |           |           |   |          |          |           |   |          |          |          |   |          |           |          |   |          |           |           |   |          |           |           |   |          |           |           |   |           |           |           |   |           |          |           |   |           |          |           |   |           |          |           |   |           |          |           |   |           |           |           |
| C                                                                                                                                                                                                                                                                                                                                                                                                         | 0.583934                                                                                                                                                                                                                                                                                                                                                                                                                                                                                                                                                                                                                                                                                                                                                                                                                                                                                                                                                                                                                                                                                                                                                                                                                                                                                                                                                                                                                                                                                                                                                                                                                                                                                                                                                                                                                                                                                                                                                                                                                                                                                                                                                                                                                                                                                                                                                                                                                                                                                                                                                                                                                                                                                                                                                                                                                                                                                                                                                                                                                                                                                                                                                                                   | 3.037701       | -0.925021       |                |                                               |                 |           |                 |                                                                                                                                                                                                                                                                                                                                                                                                                                                                                                                                                                                                                                                                                                                                                                                                                                                                                                                                                                                                                     |    |           |           |           |   |           |           |           |   |           |           |          |   |           |           |           |   |           |           |           |   |           |           |           |   |           |           |          |   |           |           |          |   |          |           |           |   |          |           |          |   |          |           |          |   |          |           |           |   |          |           |           |   |          |          |           |   |          |          |          |   |          |          |          |   |          |          |           |   |           |          |          |   |           |          |           |   |          |          |           |   |           |          |          |   |           |          |          |   |           |          |          |   |           |          |           |   |           |          |          |   |           |          |          |   |          |           |           |   |          |          |           |   |          |          |          |   |          |           |          |   |          |           |           |   |          |           |           |   |          |           |           |   |           |           |           |   |           |          |           |   |           |          |           |   |           |          |           |   |           |          |           |   |           |           |           |
| C                                                                                                                                                                                                                                                                                                                                                                                                         | 1.176679                                                                                                                                                                                                                                                                                                                                                                                                                                                                                                                                                                                                                                                                                                                                                                                                                                                                                                                                                                                                                                                                                                                                                                                                                                                                                                                                                                                                                                                                                                                                                                                                                                                                                                                                                                                                                                                                                                                                                                                                                                                                                                                                                                                                                                                                                                                                                                                                                                                                                                                                                                                                                                                                                                                                                                                                                                                                                                                                                                                                                                                                                                                                                                                   | 3.508280       | 0.275112        |                |                                               |                 |           |                 |                                                                                                                                                                                                                                                                                                                                                                                                                                                                                                                                                                                                                                                                                                                                                                                                                                                                                                                                                                                                                     |    |           |           |           |   |           |           |           |   |           |           |          |   |           |           |           |   |           |           |           |   |           |           |           |   |           |           |          |   |           |           |          |   |          |           |           |   |          |           |          |   |          |           |          |   |          |           |           |   |          |           |           |   |          |          |           |   |          |          |          |   |          |          |          |   |          |          |           |   |           |          |          |   |           |          |           |   |          |          |           |   |           |          |          |   |           |          |          |   |           |          |          |   |           |          |           |   |           |          |          |   |           |          |          |   |          |           |           |   |          |          |           |   |          |          |          |   |          |           |          |   |          |           |           |   |          |           |           |   |          |           |           |   |           |           |           |   |           |          |           |   |           |          |           |   |           |          |           |   |           |          |           |   |           |           |           |
| C                                                                                                                                                                                                                                                                                                                                                                                                         | 1.036196                                                                                                                                                                                                                                                                                                                                                                                                                                                                                                                                                                                                                                                                                                                                                                                                                                                                                                                                                                                                                                                                                                                                                                                                                                                                                                                                                                                                                                                                                                                                                                                                                                                                                                                                                                                                                                                                                                                                                                                                                                                                                                                                                                                                                                                                                                                                                                                                                                                                                                                                                                                                                                                                                                                                                                                                                                                                                                                                                                                                                                                                                                                                                                                   | 2.436063       | 1.175036        |                |                                               |                 |           |                 |                                                                                                                                                                                                                                                                                                                                                                                                                                                                                                                                                                                                                                                                                                                                                                                                                                                                                                                                                                                                                     |    |           |           |           |   |           |           |           |   |           |           |          |   |           |           |           |   |           |           |           |   |           |           |           |   |           |           |          |   |           |           |          |   |          |           |           |   |          |           |          |   |          |           |          |   |          |           |           |   |          |           |           |   |          |          |           |   |          |          |          |   |          |          |          |   |          |          |           |   |           |          |          |   |           |          |           |   |          |          |           |   |           |          |          |   |           |          |          |   |           |          |          |   |           |          |           |   |           |          |          |   |           |          |          |   |          |           |           |   |          |          |           |   |          |          |          |   |          |           |          |   |          |           |           |   |          |           |           |   |          |           |           |   |           |           |           |   |           |          |           |   |           |          |           |   |           |          |           |   |           |          |           |   |           |           |           |
| C                                                                                                                                                                                                                                                                                                                                                                                                         | 2.339330                                                                                                                                                                                                                                                                                                                                                                                                                                                                                                                                                                                                                                                                                                                                                                                                                                                                                                                                                                                                                                                                                                                                                                                                                                                                                                                                                                                                                                                                                                                                                                                                                                                                                                                                                                                                                                                                                                                                                                                                                                                                                                                                                                                                                                                                                                                                                                                                                                                                                                                                                                                                                                                                                                                                                                                                                                                                                                                                                                                                                                                                                                                                                                                   | -2.024407      | -0.924644       |                |                                               |                 |           |                 |                                                                                                                                                                                                                                                                                                                                                                                                                                                                                                                                                                                                                                                                                                                                                                                                                                                                                                                                                                                                                     |    |           |           |           |   |           |           |           |   |           |           |          |   |           |           |           |   |           |           |           |   |           |           |           |   |           |           |          |   |           |           |          |   |          |           |           |   |          |           |          |   |          |           |          |   |          |           |           |   |          |           |           |   |          |          |           |   |          |          |          |   |          |          |          |   |          |          |           |   |           |          |          |   |           |          |           |   |          |          |           |   |           |          |          |   |           |          |          |   |           |          |          |   |           |          |           |   |           |          |          |   |           |          |          |   |          |           |           |   |          |          |           |   |          |          |          |   |          |           |          |   |          |           |           |   |          |           |           |   |          |           |           |   |           |           |           |   |           |          |           |   |           |          |           |   |           |          |           |   |           |          |           |   |           |           |           |

|                                                                                     |                                                                                                                                                                                                                                                                                                                                                                                                                                                                                                                                                                                                                                                                                                                                                                                                                                                                                                                                                                                                                                                                                                                                                                                                                        |
|-------------------------------------------------------------------------------------|------------------------------------------------------------------------------------------------------------------------------------------------------------------------------------------------------------------------------------------------------------------------------------------------------------------------------------------------------------------------------------------------------------------------------------------------------------------------------------------------------------------------------------------------------------------------------------------------------------------------------------------------------------------------------------------------------------------------------------------------------------------------------------------------------------------------------------------------------------------------------------------------------------------------------------------------------------------------------------------------------------------------------------------------------------------------------------------------------------------------------------------------------------------------------------------------------------------------|
|                                                                                     | <p>C 2.450641 -2.772901 0.275553<br/> C 1.591633 -2.115646 1.175217<br/> C -2.923366 -1.013806 -0.924738<br/> C -3.627317 -0.735326 0.275244<br/> C -2.628574 -0.320374 1.175039<br/> H -0.000212 0.000031 2.244752<br/> C 0.408284 3.738342 -2.249249<br/> F -0.582424 4.655784 -2.202540<br/> F 1.539047 4.365975 -2.630671<br/> F 0.084469 2.841238 -3.230758<br/> C 1.520313 2.277151 2.598571<br/> F 0.495352 2.128056 3.468463<br/> F 2.314045 1.178448 2.706631<br/> F 2.242227 3.344567 2.989411<br/> C -3.441770 -1.517015 -2.248893<br/> F -4.552574 -0.854254 -2.629476<br/> F -2.503831 -1.346088 -3.230792<br/> F -3.737541 -2.834520 -2.202658<br/> C -2.733188 0.179106 2.598285<br/> F -2.178485 1.415848 2.705827<br/> F -4.018643 0.270957 2.988782<br/> F -2.091876 -0.633623 3.468703<br/> C 3.034119 -2.222292 -2.248832<br/> F 4.322911 -1.819406 -2.202978<br/> F 3.015745 -3.515800 -2.628879<br/> F 2.416877 -1.496023 -3.231002<br/> C 1.212044 -2.455518 2.598741<br/> F -0.136312 -2.593241 2.707038<br/> F 1.775277 -3.614654 2.989297<br/> F 1.595820 -1.493502 3.468609<br/> Br 3.542544 -4.277560 0.547032<br/> Br 1.934951 5.205748 0.546238<br/> Br -5.476471 -0.927459 0.546446</p> |
|                                                                                     | <p>2<br/> N2 SCF Done: -109.442811318 A.U.<br/> N 0.000000 0.000000 0.556219<br/> N 0.000000 0.000000 -0.556219</p>                                                                                                                                                                                                                                                                                                                                                                                                                                                                                                                                                                                                                                                                                                                                                                                                                                                                                                                                                                                                                                                                                                    |
| 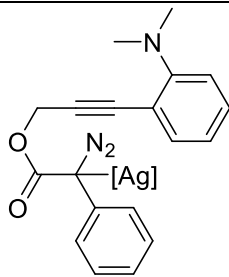 | <p>86<br/> B SCF Done: -11638.5377222 A.U.<br/> C 7.631388 0.137612 -0.604987<br/> C 8.885248 -0.313715 -0.107243<br/> C 8.969043 -1.171200 0.997061<br/> C 7.807027 -1.625076 1.650553<br/> C 6.559851 -1.176774 1.202271<br/> C 6.447351 -0.280079 0.105933<br/> H 9.811171 -0.014383 -0.618433<br/> H 9.961256 -1.506941 1.339190<br/> H 7.875555 -2.306783 2.511783<br/> H 5.634641 -1.474222 1.717138<br/> C 5.160515 0.247585 -0.201745<br/> C 4.029125 0.664641 -0.435022<br/> C 2.698480 1.091419 -0.821247<br/> H 1.917359 0.407046 -0.415852<br/> H 2.454587 2.107883 -0.449819<br/> C 1.946628 0.399871 -3.130349<br/> C 1.241126 -0.857787 -2.594797<br/> C 1.838625 -1.865668 -1.622983<br/> C 3.233610 -2.068628 -1.594260</p>                                                                                                                                                                                                                                                                                                                                                                                                                                                                           |

|    |           |           |           |
|----|-----------|-----------|-----------|
| C  | 0.998787  | -2.649599 | -0.798155 |
| C  | 3.789092  | -3.002421 | -0.703413 |
| H  | 3.887714  | -1.477937 | -2.251809 |
| C  | 1.557016  | -3.611878 | 0.053464  |
| H  | -0.093952 | -2.511417 | -0.823569 |
| C  | 2.952468  | -3.775569 | 0.118105  |
| H  | 4.883103  | -3.113398 | -0.649943 |
| H  | 0.894692  | -4.219217 | 0.687095  |
| H  | 3.386844  | -4.503150 | 0.820710  |
| O  | 2.611609  | 1.207301  | -2.279455 |
| O  | 1.881638  | 0.690110  | -4.309973 |
| Ag | -0.491785 | 0.123413  | -1.554624 |
| N  | -2.463647 | -0.899990 | -0.876286 |
| N  | -3.106842 | -0.279024 | 0.129985  |
| N  | -1.187694 | 1.927021  | -0.400669 |
| N  | -1.747565 | 1.768961  | 0.816758  |
| N  | 0.156438  | 0.101757  | 1.732611  |
| N  | -1.048582 | -0.502714 | 1.643875  |
| B  | -2.293661 | 0.384298  | 1.282460  |
| C  | -3.393877 | -1.421387 | -1.694173 |
| C  | -4.693409 | -1.114236 | -1.215253 |
| C  | -4.461819 | -0.375317 | -0.038368 |
| C  | -0.734345 | 3.190354  | -0.478384 |
| C  | -0.985966 | 3.872364  | 0.738077  |
| C  | -1.634827 | 2.920547  | 1.544489  |
| C  | 0.979727  | -0.761972 | 2.340777  |
| C  | 0.303400  | -1.967440 | 2.661392  |
| C  | -1.004590 | -1.764709 | 2.193301  |
| H  | -3.009740 | 0.532647  | 2.241173  |
| C  | -2.914925 | -2.097499 | -2.950404 |
| F  | -2.460288 | -1.167205 | -3.847318 |
| F  | -1.857866 | -2.916571 | -2.683351 |
| F  | -3.865787 | -2.822655 | -3.554083 |
| C  | -5.428522 | 0.293532  | 0.914098  |
| F  | -5.399226 | -0.260682 | 2.147179  |
| F  | -5.117310 | 1.609983  | 1.047651  |
| F  | -6.693727 | 0.216101  | 0.458429  |
| C  | 2.414404  | -0.407188 | 2.623739  |
| F  | 3.258318  | -1.259539 | 1.973273  |
| F  | 2.701183  | 0.849876  | 2.222257  |
| F  | 2.697953  | -0.500763 | 3.943504  |
| C  | -2.137308 | -2.748340 | 2.093504  |
| F  | -2.028303 | -3.730745 | 3.007097  |
| F  | -3.347071 | -2.159513 | 2.258542  |
| F  | -2.150863 | -3.341562 | 0.858839  |
| C  | -0.053201 | 3.720915  | -1.716772 |
| F  | -0.620045 | 4.871745  | -2.132808 |
| F  | 1.259622  | 3.971091  | -1.478953 |
| F  | -0.122727 | 2.830662  | -2.741335 |
| C  | -2.132519 | 3.018211  | 2.970464  |
| F  | -1.589876 | 2.041345  | 3.740881  |
| F  | -1.799560 | 4.203486  | 3.517370  |
| F  | -3.478715 | 2.893858  | 3.038877  |
| Br | -0.529807 | 5.654790  | 1.114998  |
| Br | -6.333770 | -1.611422 | -1.986352 |
| Br | 1.035489  | -3.458187 | 3.548006  |
| N  | 0.720498  | -1.517803 | -3.677631 |
| N  | 0.286221  | -2.089149 | -4.554987 |
| N  | 7.553993  | 0.970101  | -1.716931 |
| C  | 6.515790  | 0.811568  | -2.733649 |



|  |                                                                                                                                                                                                                                                                                                                                                                                                                                                                                                                                                                                                                                                                                                                                                                                                                                                                                                                                                                                                                                                                                                                                                                                                                                                                                                                                                                                                                                                                                                                                                                                                                                                                                                                                                                                                                                                                                                                                                                                                        |
|--|--------------------------------------------------------------------------------------------------------------------------------------------------------------------------------------------------------------------------------------------------------------------------------------------------------------------------------------------------------------------------------------------------------------------------------------------------------------------------------------------------------------------------------------------------------------------------------------------------------------------------------------------------------------------------------------------------------------------------------------------------------------------------------------------------------------------------------------------------------------------------------------------------------------------------------------------------------------------------------------------------------------------------------------------------------------------------------------------------------------------------------------------------------------------------------------------------------------------------------------------------------------------------------------------------------------------------------------------------------------------------------------------------------------------------------------------------------------------------------------------------------------------------------------------------------------------------------------------------------------------------------------------------------------------------------------------------------------------------------------------------------------------------------------------------------------------------------------------------------------------------------------------------------------------------------------------------------------------------------------------------------|
|  | <p>H 6.988147 0.739965 -3.739511</p> <p>H 5.949816 -0.124169 -2.569590</p> <p>H 5.784196 1.648828 -2.746547</p> <p>C 8.716928 1.730029 -2.141019</p> <p>H 9.429184 1.140467 -2.771592</p> <p>H 8.382237 2.602115 -2.740219</p> <p>H 9.269459 2.122859 -1.264096</p>                                                                                                                                                                                                                                                                                                                                                                                                                                                                                                                                                                                                                                                                                                                                                                                                                                                                                                                                                                                                                                                                                                                                                                                                                                                                                                                                                                                                                                                                                                                                                                                                                                                                                                                                    |
|  | <p>86</p> <p>TS-BC SCF Done: -11638.5236538 A.U.</p> <p>C 7.019519 0.009207 -0.940668</p> <p>C 8.211946 -0.751139 -0.850107</p> <p>C 8.818608 -1.016591 0.388020</p> <p>C 8.260768 -0.524720 1.581538</p> <p>C 7.071902 0.214954 1.525552</p> <p>C 6.429132 0.475962 0.291727</p> <p>H 8.688463 -1.123729 -1.767934</p> <p>H 9.751064 -1.602843 0.414734</p> <p>H 8.740912 -0.728282 2.550688</p> <p>H 6.589481 0.571894 2.448057</p> <p>C 5.126351 1.048578 0.260498</p> <p>C 3.961790 1.409204 0.110764</p> <p>C 2.611756 1.673365 -0.358407</p> <p>H 1.873070 0.950255 0.061831</p> <p>H 2.245581 2.686308 -0.097353</p> <p>C 2.442465 0.513151 -2.550380</p> <p>C 1.733038 -0.637077 -1.865464</p> <p>C 2.463290 -1.551118 -0.969744</p> <p>C 3.883263 -1.578940 -0.963365</p> <p>C 1.750160 -2.452123 -0.129561</p> <p>C 4.571571 -2.444103 -0.102267</p> <p>H 4.455053 -0.900790 -1.618002</p> <p>C 2.442150 -3.344707 0.692851</p> <p>H 0.647344 -2.447040 -0.141562</p> <p>C 3.851656 -3.328942 0.720091</p> <p>H 5.672159 -2.421839 -0.077145</p> <p>H 1.884667 -4.042529 1.333774</p> <p>H 4.391068 -4.014721 1.392472</p> <p>O 2.621876 1.642442 -1.818816</p> <p>O 2.747424 0.527270 -3.732405</p> <p>Ag -0.254148 -0.143133 -1.347197</p> <p>N -2.287823 -1.036214 -0.912611</p> <p>N -3.079378 -0.447943 0.001863</p> <p>N -1.297897 1.800341 -0.573065</p> <p>N -1.948753 1.741549 0.606361</p> <p>N -0.037887 0.334595 1.885719</p> <p>N -1.176296 -0.374197 1.722808</p> <p>B -2.442478 0.376847 1.164263</p> <p>C -3.072055 -1.718379 -1.762822</p> <p>C -4.434577 -1.550737 -1.403293</p> <p>C -4.393817 -0.721671 -0.264427</p> <p>C -0.937923 3.079503 -0.769047</p> <p>C -1.348699 3.876956 0.329857</p> <p>C -1.990996 2.974673 1.195300</p> <p>C 0.799345 -0.430437 2.598955</p> <p>C 0.199982 -1.678770 2.911822</p> <p>C -1.076734 -1.605438 2.330343</p> <p>H -3.261766 0.549754 2.032300</p> <p>C -2.401823 -2.436380 -2.906467</p> <p>F -1.892944 -1.541178 -3.806374</p> |

|  |                                 |           |           |           |
|--|---------------------------------|-----------|-----------|-----------|
|  | F                               | -1.344000 | -3.170559 | -2.459447 |
|  | F                               | -3.233042 | -3.257304 | -3.564654 |
|  | C                               | -5.511734 | -0.104492 | 0.548453  |
|  | F                               | -5.532268 | -0.552435 | 1.823816  |
|  | F                               | -5.365492 | 1.246002  | 0.590919  |
|  | F                               | -6.714010 | -0.369316 | 0.001066  |
|  | C                               | 2.178788  | 0.056454  | 2.958910  |
|  | F                               | 3.138426  | -0.648157 | 2.299684  |
|  | F                               | 2.335710  | 1.362414  | 2.639236  |
|  | F                               | 2.422004  | -0.080683 | 4.283094  |
|  | C                               | -2.125754 | -2.675165 | 2.197700  |
|  | F                               | -1.987510 | -3.629852 | 3.136581  |
|  | F                               | -3.380986 | -2.173654 | 2.297111  |
|  | F                               | -2.039305 | -3.288370 | 0.977595  |
|  | C                               | -0.243745 | 3.530962  | -2.030195 |
|  | F                               | -0.971770 | 4.471346  | -2.673506 |
|  | F                               | 0.967721  | 4.074076  | -1.753572 |
|  | F                               | -0.054092 | 2.498339  | -2.890504 |
|  | C                               | -2.628721 | 3.189634  | 2.548844  |
|  | F                               | -2.100860 | 2.347560  | 3.474052  |
|  | F                               | -2.432641 | 4.450164  | 2.982717  |
|  | F                               | -3.964415 | 2.966985  | 2.510598  |
|  | Br                              | -1.073787 | 5.726588  | 0.512960  |
|  | Br                              | -5.933994 | -2.294471 | -2.258703 |
|  | Br                              | 0.964891  | -3.065565 | 3.931123  |
|  | N                               | 1.513055  | -1.646188 | -3.362028 |
|  | N                               | 1.103953  | -2.460921 | -4.012563 |
|  | C                               | 6.684796  | -0.645974 | -3.289909 |
|  | H                               | 6.721473  | -1.704150 | -2.960278 |
|  | H                               | 5.878058  | -0.549219 | -4.046035 |
|  | H                               | 7.652674  | -0.396638 | -3.793758 |
|  | C                               | 6.024536  | 1.589229  | -2.590057 |
|  | H                               | 6.844879  | 2.030989  | -3.206556 |
|  | H                               | 5.090111  | 1.578269  | -3.189397 |
|  | H                               | 5.855831  | 2.242883  | -1.717447 |
|  | N                               | 6.369287  | 0.226044  | -2.168758 |
|  | 84                              |           |           |           |
|  | C SCF Done: -11529.1021015 A.U. |           |           |           |
|  | C                               | 6.940076  | 0.131867  | -1.075060 |
|  | C                               | 8.072658  | -0.720830 | -1.030326 |
|  | C                               | 8.559754  | -1.224084 | 0.185996  |
|  | C                               | 7.939222  | -0.890164 | 1.403872  |
|  | C                               | 6.809049  | -0.062422 | 1.389648  |
|  | C                               | 6.286931  | 0.442800  | 0.174619  |
|  | H                               | 8.595278  | -0.976743 | -1.963024 |
|  | H                               | 9.449024  | -1.874544 | 0.180036  |
|  | H                               | 8.325369  | -1.283587 | 2.356316  |
|  | H                               | 6.274570  | 0.173667  | 2.322017  |
|  | C                               | 5.024846  | 1.100616  | 0.151027  |
|  | C                               | 3.900068  | 1.573009  | 0.004541  |
|  | C                               | 2.564314  | 1.950946  | -0.424723 |
|  | H                               | 1.787780  | 1.267439  | 0.002261  |
|  | H                               | 2.274708  | 2.979754  | -0.133035 |
|  | C                               | 2.307938  | 0.759778  | -2.503258 |
|  | C                               | 1.675132  | -0.362771 | -1.792094 |
|  | C                               | 2.462750  | -1.456097 | -1.324861 |
|  | C                               | 3.895761  | -1.434255 | -1.397055 |
|  | C                               | 1.824849  | -2.590234 | -0.717875 |
|  | C                               | 4.649628  | -2.464165 | -0.833439 |

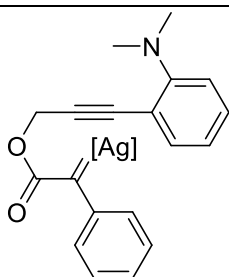

|    |           |           |           |
|----|-----------|-----------|-----------|
| H  | 4.407079  | -0.592182 | -1.889379 |
| C  | 2.586096  | -3.626369 | -0.181533 |
| H  | 0.723854  | -2.624169 | -0.685808 |
| C  | 3.995538  | -3.554202 | -0.223375 |
| H  | 5.749156  | -2.413720 | -0.856146 |
| H  | 2.090913  | -4.490447 | 0.283519  |
| H  | 4.593088  | -4.365726 | 0.222129  |
| O  | 2.520047  | 1.944991  | -1.889482 |
| O  | 2.524525  | 0.618683  | -3.701483 |
| Ag | -0.330707 | -0.150128 | -1.442097 |
| N  | -2.407743 | -0.834356 | -1.079261 |
| N  | -3.074388 | -0.409511 | 0.011401  |
| N  | -1.305805 | 1.824916  | -0.388640 |
| N  | -1.807292 | 1.613176  | 0.842763  |
| N  | 0.141537  | -0.011780 | 1.763584  |
| N  | -1.019799 | -0.668564 | 1.545642  |
| B  | -2.303829 | 0.193940  | 1.229699  |
| C  | -3.301921 | -1.327601 | -1.951226 |
| C  | -4.611060 | -1.200730 | -1.419013 |
| C  | -4.419034 | -0.599908 | -0.158989 |
| C  | -0.892079 | 3.100426  | -0.437932 |
| C  | -1.118978 | 3.737848  | 0.810462  |
| C  | -1.704484 | 2.740711  | 1.610167  |
| C  | 1.008938  | -0.904925 | 2.256903  |
| C  | 0.406974  | -2.186457 | 2.365509  |
| C  | -0.904711 | -1.993761 | 1.899949  |
| H  | -3.033052 | 0.241553  | 2.189644  |
| C  | -2.781202 | -1.844470 | -3.271170 |
| F  | -2.249904 | -0.825066 | -4.003684 |
| F  | -1.782957 | -2.746307 | -3.074148 |
| F  | -3.738583 | -2.432329 | -4.007154 |
| C  | -5.423023 | -0.121910 | 0.868719  |
| F  | -5.326102 | -0.794814 | 2.037848  |
| F  | -5.226109 | 1.195565  | 1.136925  |
| F  | -6.684601 | -0.263536 | 0.418089  |
| C  | 2.415066  | -0.502399 | 2.616411  |
| F  | 3.325290  | -1.072876 | 1.775901  |
| F  | 2.574454  | 0.837452  | 2.546446  |
| F  | 2.737082  | -0.896680 | 3.870845  |
| C  | -1.982996 | -3.012479 | 1.649041  |
| F  | -1.796006 | -4.127072 | 2.380969  |
| F  | -3.216178 | -2.530391 | 1.935577  |
| F  | -1.997015 | -3.387589 | 0.333533  |
| C  | -0.383510 | 3.705201  | -1.721865 |
| F  | -1.250986 | 4.625958  | -2.202854 |
| F  | 0.806107  | 4.332656  | -1.535534 |
| F  | -0.213927 | 2.759393  | -2.678610 |
| C  | -2.173179 | 2.768387  | 3.045589  |
| F  | -1.610768 | 1.761658  | 3.763018  |
| F  | -1.845032 | 3.930942  | 3.643090  |
| F  | -3.518079 | 2.622485  | 3.129744  |
| Br | -0.719618 | 5.526685  | 1.227786  |
| Br | -6.221189 | -1.740945 | -2.224274 |
| Br | 1.209432  | -3.747391 | 3.048802  |
| C  | 6.712501  | -0.145213 | -3.514715 |
| H  | 6.683601  | -1.240273 | -3.342768 |
| H  | 5.940594  | 0.097886  | -4.274066 |
| H  | 7.710376  | 0.121139  | -3.944917 |
| C  | 6.064913  | 1.983788  | -2.506524 |
| H  | 6.809512  | 2.453019  | -3.192516 |

|                                                                                   |    |                                 |           |           |
|-----------------------------------------------------------------------------------|----|---------------------------------|-----------|-----------|
|                                                                                   | H  | 5.051802                        | 2.092929  | -2.949108 |
|                                                                                   | H  | 6.081365                        | 2.543223  | -1.555501 |
|                                                                                   | N  | 6.397459                        | 0.571954  | -2.289403 |
| 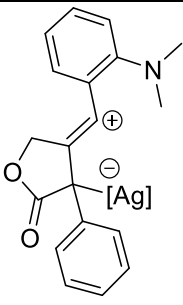 | 84 | D SCF Done: -11529.1604944 A.U. |           |           |
|                                                                                   | C  | 5.279947                        | 0.256560  | -0.623821 |
|                                                                                   | C  | 5.830831                        | 1.291404  | 0.203400  |
|                                                                                   | C  | 5.055865                        | 2.353321  | 0.648507  |
|                                                                                   | C  | 3.674187                        | 2.473636  | 0.326659  |
|                                                                                   | C  | 3.112590                        | 1.523998  | -0.494838 |
|                                                                                   | C  | 3.885394                        | 0.437379  | -1.070358 |
|                                                                                   | H  | 6.879451                        | 1.246886  | 0.520161  |
|                                                                                   | H  | 5.527118                        | 3.113445  | 1.292307  |
|                                                                                   | H  | 3.074586                        | 3.303783  | 0.726169  |
|                                                                                   | H  | 2.055336                        | 1.571796  | -0.781415 |
|                                                                                   | C  | 3.289776                        | -0.289722 | -2.076896 |
|                                                                                   | C  | 2.206089                        | -0.362252 | -2.871592 |
|                                                                                   | C  | 2.077749                        | 0.544750  | -4.112727 |
|                                                                                   | H  | 1.816509                        | 1.578556  | -3.803994 |
|                                                                                   | H  | 3.021207                        | 0.570880  | -4.696874 |
|                                                                                   | C  | 0.470462                        | -1.122834 | -4.280394 |
|                                                                                   | C  | 1.089217                        | -1.294517 | -2.927913 |
|                                                                                   | C  | 1.073167                        | -2.591778 | -2.194707 |
|                                                                                   | C  | 0.283767                        | -3.692540 | -2.618195 |
|                                                                                   | C  | 1.880085                        | -2.760027 | -1.043123 |
|                                                                                   | C  | 0.333765                        | -4.909283 | -1.921128 |
|                                                                                   | H  | -0.367528                       | -3.572997 | -3.493950 |
|                                                                                   | C  | 1.947579                        | -3.985498 | -0.367071 |
|                                                                                   | H  | 2.438640                        | -1.901426 | -0.643861 |
|                                                                                   | C  | 1.168933                        | -5.071702 | -0.800093 |
|                                                                                   | H  | -0.290870                       | -5.748482 | -2.267157 |
|                                                                                   | H  | 2.598195                        | -4.076805 | 0.514709  |
|                                                                                   | H  | 1.202063                        | -6.029996 | -0.258670 |
|                                                                                   | O  | 1.038949                        | -0.010394 | -4.902034 |
|                                                                                   | O  | -0.391086                       | -1.771293 | -4.835728 |
|                                                                                   | Ag | -0.350814                       | -0.176263 | -1.648685 |
|                                                                                   | N  | -2.279748                       | -0.529184 | -0.495690 |
|                                                                                   | N  | -2.475039                       | 0.127481  | 0.663546  |
|                                                                                   | N  | -0.517149                       | 1.878795  | -0.476561 |
|                                                                                   | N  | -0.587972                       | 1.793798  | 0.865581  |
|                                                                                   | N  | 1.100239                        | -0.252874 | 1.596938  |
|                                                                                   | N  | -0.203206                       | -0.599710 | 1.637360  |
|                                                                                   | B  | -1.265440                       | 0.555225  | 1.539375  |
|                                                                                   | C  | -3.481976                       | -0.773162 | -1.039785 |
|                                                                                   | C  | -4.504430                       | -0.233851 | -0.215158 |
|                                                                                   | C  | -3.813001                       | 0.340993  | 0.868173  |
|                                                                                   | C  | 0.003829                        | 3.081076  | -0.776005 |
|                                                                                   | C  | 0.310704                        | 3.789336  | 0.412711  |
|                                                                                   | C  | -0.079476                       | 2.920222  | 1.448217  |
|                                                                                   | C  | 1.793316                        | -1.295757 | 2.078994  |
|                                                                                   | C  | 0.922952                        | -2.362137 | 2.436094  |
|                                                                                   | C  | -0.358932                       | -1.874398 | 2.139321  |
|                                                                                   | H  | -1.651931                       | 0.862939  | 2.641461  |
|                                                                                   | C  | -3.519169                       | -1.442042 | -2.394397 |
|                                                                                   | F  | -4.756319                       | -1.851771 | -2.728785 |
|                                                                                   | F  | -3.088464                       | -0.576000 | -3.355653 |
|                                                                                   | F  | -2.692404                       | -2.514070 | -2.423301 |
|                                                                                   | C  | -4.315460                       | 1.152301  | 2.041079  |
|                                                                                   | F  | -4.075112                       | 0.554825  | 3.230255  |

|                                                                                     |                                                                                                                                                                                                                                                                                                                                                                                                                                                                                                                                                                                                                                                                                                                                                                                                                                                                                                                                                                                                                                                                                                                                                                      |
|-------------------------------------------------------------------------------------|----------------------------------------------------------------------------------------------------------------------------------------------------------------------------------------------------------------------------------------------------------------------------------------------------------------------------------------------------------------------------------------------------------------------------------------------------------------------------------------------------------------------------------------------------------------------------------------------------------------------------------------------------------------------------------------------------------------------------------------------------------------------------------------------------------------------------------------------------------------------------------------------------------------------------------------------------------------------------------------------------------------------------------------------------------------------------------------------------------------------------------------------------------------------|
|                                                                                     | <p>F -3.700972 2.368192 2.065901</p> <p>F -5.641901 1.370046 1.953342</p> <p>C 3.289386 -1.228545 2.211470</p> <p>F 3.935001 -1.905328 1.197804</p> <p>F 3.740296 0.043319 2.168476</p> <p>F 3.717256 -1.782860 3.366258</p> <p>C -1.696683 -2.560468 2.255439</p> <p>F -2.178977 -2.929000 1.039590</p> <p>F -1.619373 -3.670702 3.014165</p> <p>F -2.625930 -1.744464 2.821475</p> <p>C 0.230911 3.498806 -2.204289</p> <p>F -0.288628 4.715981 -2.458195</p> <p>F 1.567718 3.561937 -2.488318</p> <p>F -0.318228 2.614543 -3.073207</p> <p>C -0.025171 3.101461 2.948414</p> <p>F 0.442892 1.990928 3.565579</p> <p>F 0.796983 4.124665 3.272991</p> <p>F -1.247601 3.372530 3.461398</p> <p>Br 1.071991 5.507754 0.513362</p> <p>Br -6.359404 -0.302935 -0.515925</p> <p>Br 1.411339 -4.027232 3.169724</p> <p>C 5.530479 -1.950503 -1.740150</p> <p>H 5.476096 -1.705056 -2.821524</p> <p>H 6.203891 -2.814980 -1.591542</p> <p>H 4.507921 -2.229833 -1.420843</p> <p>C 7.424052 -0.906101 -0.492917</p> <p>H 7.878903 -1.831187 -0.887299</p> <p>H 8.025405 -0.046539 -0.857401</p> <p>H 7.479374 -0.934815 0.616490</p> <p>N 6.034337 -0.824542 -0.952523</p> |
| 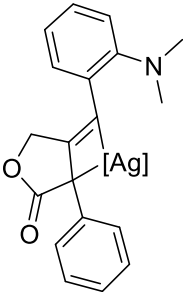 | <p>84</p> <p>E SCF Done: -11529.1899227 A.U.</p> <p>C 5.341075 1.420955 -0.545956</p> <p>C 6.044472 2.373866 -1.344038</p> <p>C 5.364588 3.193009 -2.244177</p> <p>C 3.956041 3.118213 -2.393952</p> <p>C 3.263508 2.153321 -1.682745</p> <p>C 3.926545 1.185290 -0.849337</p> <p>H 7.121951 2.529446 -1.199946</p> <p>H 5.936414 3.943709 -2.813321</p> <p>H 3.420585 3.791500 -3.078528</p> <p>H 2.178637 2.038292 -1.809000</p> <p>C 3.197073 -0.006926 -0.552197</p> <p>C 3.839862 -1.275655 -0.415348</p> <p>C 4.998828 -1.698962 -1.316479</p> <p>H 4.760778 -1.517538 -2.386709</p> <p>H 5.941328 -1.162875 -1.075880</p> <p>C 4.323528 -3.546805 -0.114707</p> <p>C 3.480541 -2.397266 0.329858</p> <p>C 2.383820 -2.527545 1.275438</p> <p>C 1.658751 -3.749533 1.360940</p> <p>C 1.924145 -1.417093 2.036337</p> <p>C 0.471307 -3.819223 2.097338</p> <p>H 2.012692 -4.619247 0.794218</p> <p>C 0.759172 -1.515528 2.813418</p> <p>H 2.520110 -0.496208 2.075286</p> <p>C 0.008482 -2.700516 2.819661</p> <p>H -0.107389 -4.756091 2.099629</p> <p>H 0.441816 -0.657176 3.420962</p>                                                                       |

|    |           |           |           |
|----|-----------|-----------|-----------|
| H  | -0.927314 | -2.753441 | 3.395910  |
| O  | 5.187190  | -3.094797 | -1.098546 |
| O  | 4.312957  | -4.705031 | 0.244116  |
| Ag | 1.079306  | -0.049004 | -0.541711 |
| N  | -0.959144 | 0.906775  | -1.714750 |
| N  | -2.033709 | 1.057712  | -0.915409 |
| N  | -0.160788 | 1.269755  | 1.174335  |
| N  | -1.348396 | 0.716348  | 1.482559  |
| N  | -0.668422 | -1.663564 | -0.491057 |
| N  | -1.899458 | -1.325047 | -0.048463 |
| B  | -2.248654 | 0.142682  | 0.335864  |
| C  | -1.022928 | 1.865042  | -2.649862 |
| C  | -2.161331 | 2.688869  | -2.442772 |
| C  | -2.784906 | 2.136357  | -1.311235 |
| C  | 0.306142  | 1.856339  | 2.286843  |
| C  | -0.598847 | 1.666737  | 3.364389  |
| C  | -1.655102 | 0.927643  | 2.803437  |
| C  | -0.744936 | -2.910753 | -0.977194 |
| C  | -2.065968 | -3.413556 | -0.837114 |
| C  | -2.781433 | -2.363471 | -0.242191 |
| H  | -3.395193 | 0.193640  | 0.687185  |
| C  | 0.037138  | 1.983553  | -3.712272 |
| F  | -0.496946 | 2.047149  | -4.950230 |
| F  | 0.780771  | 3.117602  | -3.536439 |
| F  | 0.895000  | 0.934303  | -3.678897 |
| C  | -4.015382 | 2.571222  | -0.553197 |
| F  | -4.993736 | 1.636794  | -0.594020 |
| F  | -3.716689 | 2.790987  | 0.757909  |
| F  | -4.519083 | 3.717283  | -1.052085 |
| C  | 0.371355  | -3.564344 | -1.755017 |
| F  | 0.019735  | -3.676699 | -3.060620 |
| F  | 1.520814  | -2.846885 | -1.710277 |
| F  | 0.643972  | -4.811407 | -1.303943 |
| C  | -4.263050 | -2.248112 | 0.038801  |
| F  | -4.832307 | -1.312949 | -0.766770 |
| F  | -4.892158 | -3.418733 | -0.190971 |
| F  | -4.520342 | -1.894185 | 1.319126  |
| C  | 1.645107  | 2.536862  | 2.303246  |
| F  | 1.600078  | 3.728311  | 2.933791  |
| F  | 2.576114  | 1.773316  | 2.966247  |
| F  | 2.121174  | 2.739150  | 1.054005  |
| C  | -2.874786 | 0.324110  | 3.456488  |
| F  | -2.870897 | -1.028419 | 3.283849  |
| F  | -2.886037 | 0.561546  | 4.783673  |
| F  | -4.031644 | 0.797730  | 2.945648  |
| Br | -0.353092 | 2.254016  | 5.134578  |
| Br | -2.670546 | 4.162857  | -3.494182 |
| Br | -2.648024 | -5.127479 | -1.350056 |
| C  | 5.290583  | 0.291302  | 1.679385  |
| H  | 5.231207  | -0.819340 | 1.708561  |
| H  | 5.837128  | 0.641620  | 2.580487  |
| H  | 4.263399  | 0.694376  | 1.719958  |
| C  | 7.436903  | 0.790524  | 0.583688  |
| H  | 7.756731  | -0.048811 | 1.230933  |
| H  | 7.899177  | 0.642385  | -0.412037 |
| H  | 7.826204  | 1.737834  | 1.022630  |
| N  | 5.978839  | 0.783153  | 0.489571  |

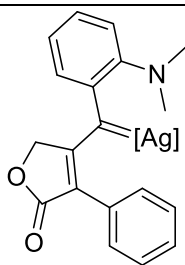

84

F SCF Done: -11529.1922169 A.U.

|    |           |           |           |
|----|-----------|-----------|-----------|
| C  | 4.792619  | 0.580515  | -0.033289 |
| C  | 5.676376  | -0.536443 | -0.110791 |
| C  | 5.206602  | -1.777775 | -0.538332 |
| C  | 3.850236  | -1.973652 | -0.904622 |
| C  | 2.947853  | -0.945929 | -0.704663 |
| C  | 3.349262  | 0.311592  | -0.123700 |
| H  | 6.753821  | -0.405953 | 0.058555  |
| H  | 5.924257  | -2.607170 | -0.644987 |
| H  | 3.512028  | -2.940377 | -1.303373 |
| H  | 1.882439  | -1.082578 | -0.944140 |
| C  | 2.356125  | 1.095926  | 0.512793  |
| C  | 2.612229  | 2.044248  | 1.552108  |
| C  | 3.458628  | 1.715243  | 2.775712  |
| H  | 3.084613  | 0.798319  | 3.278127  |
| H  | 4.528760  | 1.558238  | 2.521981  |
| C  | 2.544630  | 3.815825  | 3.068513  |
| C  | 2.076239  | 3.315536  | 1.742017  |
| C  | 1.172627  | 4.031747  | 0.853617  |
| C  | 0.369754  | 5.108502  | 1.326139  |
| C  | 0.998809  | 3.611293  | -0.497494 |
| C  | -0.586796 | 5.695475  | 0.491587  |
| H  | 0.499645  | 5.452544  | 2.361240  |
| C  | 0.021312  | 4.191498  | -1.321329 |
| H  | 1.675800  | 2.865243  | -0.933188 |
| C  | -0.777155 | 5.233986  | -0.827722 |
| H  | -1.211395 | 6.515178  | 0.880312  |
| H  | -0.095390 | 3.833737  | -2.355978 |
| H  | -1.540518 | 5.697349  | -1.472428 |
| O  | 3.335637  | 2.834146  | 3.648688  |
| O  | 2.320212  | 4.864510  | 3.635865  |
| Ag | 0.296513  | 0.715413  | 0.440005  |
| N  | 0.097810  | -1.857526 | 1.042959  |
| N  | -0.423659 | -2.440274 | -0.053670 |
| N  | 0.089687  | -0.733767 | -2.198936 |
| N  | -1.213243 | -0.823462 | -1.879222 |
| N  | -1.856122 | 0.318589  | 0.658400  |
| N  | -2.366868 | -0.892498 | 0.349141  |
| B  | -1.673071 | -1.793401 | -0.727822 |
| C  | 1.141701  | -2.602169 | 1.430363  |
| C  | 1.311026  | -3.709068 | 0.557946  |
| C  | 0.287493  | -3.561200 | -0.395463 |
| C  | 0.207292  | 0.244594  | -3.112752 |
| C  | -1.058135 | 0.827906  | -3.381417 |
| C  | -1.954543 | 0.095077  | -2.584594 |
| C  | -2.662406 | 0.883336  | 1.575966  |
| C  | -3.728547 | 0.002257  | 1.888716  |
| C  | -3.490537 | -1.131375 | 1.086721  |
| H  | -2.435320 | -2.641270 | -1.127261 |
| C  | 1.972293  | -2.181465 | 2.613127  |
| F  | 2.040827  | -3.150152 | 3.552927  |
| F  | 3.254250  | -1.886839 | 2.249832  |
| F  | 1.463097  | -1.064482 | 3.195878  |
| C  | -0.095987 | -4.433780 | -1.562647 |
| F  | -1.118487 | -5.265581 | -1.246742 |
| F  | -0.494652 | -3.692430 | -2.626499 |
| F  | 0.949160  | -5.193470 | -1.960790 |
| C  | -2.321652 | 2.271976  | 2.064530  |
| F  | -3.216294 | 2.738516  | 2.951416  |

|                                                                                     |                                                                                                                                                                                                                                                                                                                                                                                                                                                                                                                                                                                                                                                                                                                                                                                                                                                                                                                                                                                                                                                                                                                                                                                                                                                                                                                                                                                                                                                                                                                                                                                                                                                                                                                                                                                                                                                                                                                                                                                                                                                                                                                                                                                                                                                                                                                                                                                                                                                                                                                                |           |           |          |          |   |                                     |          |          |   |           |           |           |   |           |           |           |   |           |           |           |   |           |           |           |   |           |           |           |   |           |           |           |   |           |           |           |   |           |           |           |   |           |           |           |   |           |           |           |   |           |           |           |   |           |           |           |    |           |           |           |    |           |           |           |    |           |           |           |   |           |          |           |   |           |          |           |   |           |          |           |   |           |          |           |   |           |          |           |   |           |          |           |   |           |          |           |   |           |          |           |   |           |          |          |   |           |          |          |   |           |          |           |   |           |          |          |   |           |          |          |   |           |           |           |   |           |          |           |    |           |          |           |
|-------------------------------------------------------------------------------------|--------------------------------------------------------------------------------------------------------------------------------------------------------------------------------------------------------------------------------------------------------------------------------------------------------------------------------------------------------------------------------------------------------------------------------------------------------------------------------------------------------------------------------------------------------------------------------------------------------------------------------------------------------------------------------------------------------------------------------------------------------------------------------------------------------------------------------------------------------------------------------------------------------------------------------------------------------------------------------------------------------------------------------------------------------------------------------------------------------------------------------------------------------------------------------------------------------------------------------------------------------------------------------------------------------------------------------------------------------------------------------------------------------------------------------------------------------------------------------------------------------------------------------------------------------------------------------------------------------------------------------------------------------------------------------------------------------------------------------------------------------------------------------------------------------------------------------------------------------------------------------------------------------------------------------------------------------------------------------------------------------------------------------------------------------------------------------------------------------------------------------------------------------------------------------------------------------------------------------------------------------------------------------------------------------------------------------------------------------------------------------------------------------------------------------------------------------------------------------------------------------------------------------|-----------|-----------|----------|----------|---|-------------------------------------|----------|----------|---|-----------|-----------|-----------|---|-----------|-----------|-----------|---|-----------|-----------|-----------|---|-----------|-----------|-----------|---|-----------|-----------|-----------|---|-----------|-----------|-----------|---|-----------|-----------|-----------|---|-----------|-----------|-----------|---|-----------|-----------|-----------|---|-----------|-----------|-----------|---|-----------|-----------|-----------|---|-----------|-----------|-----------|----|-----------|-----------|-----------|----|-----------|-----------|-----------|----|-----------|-----------|-----------|---|-----------|----------|-----------|---|-----------|----------|-----------|---|-----------|----------|-----------|---|-----------|----------|-----------|---|-----------|----------|-----------|---|-----------|----------|-----------|---|-----------|----------|-----------|---|-----------|----------|-----------|---|-----------|----------|----------|---|-----------|----------|----------|---|-----------|----------|-----------|---|-----------|----------|----------|---|-----------|----------|----------|---|-----------|-----------|-----------|---|-----------|----------|-----------|----|-----------|----------|-----------|
|                                                                                     | <table> <tbody> <tr><td>F</td><td>-1.094252</td><td>2.286405</td><td>2.666948</td></tr> <tr><td>F</td><td>-2.259374</td><td>3.138153</td><td>1.024746</td></tr> <tr><td>C</td><td>-4.213903</td><td>-2.459354</td><td>1.012877</td></tr> <tr><td>F</td><td>-3.331343</td><td>-3.483236</td><td>1.162249</td></tr> <tr><td>F</td><td>-5.132019</td><td>-2.567242</td><td>1.993024</td></tr> <tr><td>F</td><td>-4.848021</td><td>-2.637907</td><td>-0.167305</td></tr> <tr><td>C</td><td>1.563428</td><td>0.635453</td><td>-3.631991</td></tr> <tr><td>F</td><td>1.513002</td><td>1.053017</td><td>-4.914052</td></tr> <tr><td>F</td><td>2.096961</td><td>1.674499</td><td>-2.901769</td></tr> <tr><td>F</td><td>2.443956</td><td>-0.384911</td><td>-3.555243</td></tr> <tr><td>C</td><td>-3.440659</td><td>0.287548</td><td>-2.417081</td></tr> <tr><td>F</td><td>-3.726755</td><td>1.161526</td><td>-1.411117</td></tr> <tr><td>F</td><td>-3.999074</td><td>0.775986</td><td>-3.543288</td></tr> <tr><td>F</td><td>-4.062585</td><td>-0.877724</td><td>-2.117798</td></tr> <tr><td>Br</td><td>-1.432905</td><td>2.282055</td><td>-4.518970</td></tr> <tr><td>Br</td><td>2.626562</td><td>-5.047733</td><td>0.698418</td></tr> <tr><td>Br</td><td>-5.150386</td><td>0.304329</td><td>3.080633</td></tr> <tr><td>C</td><td>4.612873</td><td>3.026002</td><td>-0.463097</td></tr> <tr><td>H</td><td>4.227187</td><td>3.706129</td><td>0.326436</td></tr> <tr><td>H</td><td>5.339162</td><td>3.584510</td><td>-1.091632</td></tr> <tr><td>H</td><td>3.765730</td><td>2.716159</td><td>-1.100103</td></tr> <tr><td>C</td><td>6.655913</td><td>2.085001</td><td>0.535879</td></tr> <tr><td>H</td><td>6.729490</td><td>3.112145</td><td>0.943219</td></tr> <tr><td>H</td><td>6.936394</td><td>1.380327</td><td>1.342663</td></tr> <tr><td>H</td><td>7.386670</td><td>1.986494</td><td>-0.299339</td></tr> <tr><td>N</td><td>5.282258</td><td>1.852430</td><td>0.095903</td></tr> </tbody> </table>                                                                                                                                                                                                                                                                                                                                                                                                                                                                                                                                    | F         | -1.094252 | 2.286405 | 2.666948 | F | -2.259374                           | 3.138153 | 1.024746 | C | -4.213903 | -2.459354 | 1.012877  | F | -3.331343 | -3.483236 | 1.162249  | F | -5.132019 | -2.567242 | 1.993024  | F | -4.848021 | -2.637907 | -0.167305 | C | 1.563428  | 0.635453  | -3.631991 | F | 1.513002  | 1.053017  | -4.914052 | F | 2.096961  | 1.674499  | -2.901769 | F | 2.443956  | -0.384911 | -3.555243 | C | -3.440659 | 0.287548  | -2.417081 | F | -3.726755 | 1.161526  | -1.411117 | F | -3.999074 | 0.775986  | -3.543288 | F | -4.062585 | -0.877724 | -2.117798 | Br | -1.432905 | 2.282055  | -4.518970 | Br | 2.626562  | -5.047733 | 0.698418  | Br | -5.150386 | 0.304329  | 3.080633  | C | 4.612873  | 3.026002 | -0.463097 | H | 4.227187  | 3.706129 | 0.326436  | H | 5.339162  | 3.584510 | -1.091632 | H | 3.765730  | 2.716159 | -1.100103 | C | 6.655913  | 2.085001 | 0.535879  | H | 6.729490  | 3.112145 | 0.943219  | H | 6.936394  | 1.380327 | 1.342663  | H | 7.386670  | 1.986494 | -0.299339 | N | 5.282258  | 1.852430 | 0.095903 |   |           |          |          |   |           |          |           |   |           |          |          |   |           |          |          |   |           |           |           |   |           |          |           |    |           |          |           |
| F                                                                                   | -1.094252                                                                                                                                                                                                                                                                                                                                                                                                                                                                                                                                                                                                                                                                                                                                                                                                                                                                                                                                                                                                                                                                                                                                                                                                                                                                                                                                                                                                                                                                                                                                                                                                                                                                                                                                                                                                                                                                                                                                                                                                                                                                                                                                                                                                                                                                                                                                                                                                                                                                                                                      | 2.286405  | 2.666948  |          |          |   |                                     |          |          |   |           |           |           |   |           |           |           |   |           |           |           |   |           |           |           |   |           |           |           |   |           |           |           |   |           |           |           |   |           |           |           |   |           |           |           |   |           |           |           |   |           |           |           |   |           |           |           |    |           |           |           |    |           |           |           |    |           |           |           |   |           |          |           |   |           |          |           |   |           |          |           |   |           |          |           |   |           |          |           |   |           |          |           |   |           |          |           |   |           |          |           |   |           |          |          |   |           |          |          |   |           |          |           |   |           |          |          |   |           |          |          |   |           |           |           |   |           |          |           |    |           |          |           |
| F                                                                                   | -2.259374                                                                                                                                                                                                                                                                                                                                                                                                                                                                                                                                                                                                                                                                                                                                                                                                                                                                                                                                                                                                                                                                                                                                                                                                                                                                                                                                                                                                                                                                                                                                                                                                                                                                                                                                                                                                                                                                                                                                                                                                                                                                                                                                                                                                                                                                                                                                                                                                                                                                                                                      | 3.138153  | 1.024746  |          |          |   |                                     |          |          |   |           |           |           |   |           |           |           |   |           |           |           |   |           |           |           |   |           |           |           |   |           |           |           |   |           |           |           |   |           |           |           |   |           |           |           |   |           |           |           |   |           |           |           |   |           |           |           |    |           |           |           |    |           |           |           |    |           |           |           |   |           |          |           |   |           |          |           |   |           |          |           |   |           |          |           |   |           |          |           |   |           |          |           |   |           |          |           |   |           |          |           |   |           |          |          |   |           |          |          |   |           |          |           |   |           |          |          |   |           |          |          |   |           |           |           |   |           |          |           |    |           |          |           |
| C                                                                                   | -4.213903                                                                                                                                                                                                                                                                                                                                                                                                                                                                                                                                                                                                                                                                                                                                                                                                                                                                                                                                                                                                                                                                                                                                                                                                                                                                                                                                                                                                                                                                                                                                                                                                                                                                                                                                                                                                                                                                                                                                                                                                                                                                                                                                                                                                                                                                                                                                                                                                                                                                                                                      | -2.459354 | 1.012877  |          |          |   |                                     |          |          |   |           |           |           |   |           |           |           |   |           |           |           |   |           |           |           |   |           |           |           |   |           |           |           |   |           |           |           |   |           |           |           |   |           |           |           |   |           |           |           |   |           |           |           |   |           |           |           |    |           |           |           |    |           |           |           |    |           |           |           |   |           |          |           |   |           |          |           |   |           |          |           |   |           |          |           |   |           |          |           |   |           |          |           |   |           |          |           |   |           |          |           |   |           |          |          |   |           |          |          |   |           |          |           |   |           |          |          |   |           |          |          |   |           |           |           |   |           |          |           |    |           |          |           |
| F                                                                                   | -3.331343                                                                                                                                                                                                                                                                                                                                                                                                                                                                                                                                                                                                                                                                                                                                                                                                                                                                                                                                                                                                                                                                                                                                                                                                                                                                                                                                                                                                                                                                                                                                                                                                                                                                                                                                                                                                                                                                                                                                                                                                                                                                                                                                                                                                                                                                                                                                                                                                                                                                                                                      | -3.483236 | 1.162249  |          |          |   |                                     |          |          |   |           |           |           |   |           |           |           |   |           |           |           |   |           |           |           |   |           |           |           |   |           |           |           |   |           |           |           |   |           |           |           |   |           |           |           |   |           |           |           |   |           |           |           |   |           |           |           |    |           |           |           |    |           |           |           |    |           |           |           |   |           |          |           |   |           |          |           |   |           |          |           |   |           |          |           |   |           |          |           |   |           |          |           |   |           |          |           |   |           |          |           |   |           |          |          |   |           |          |          |   |           |          |           |   |           |          |          |   |           |          |          |   |           |           |           |   |           |          |           |    |           |          |           |
| F                                                                                   | -5.132019                                                                                                                                                                                                                                                                                                                                                                                                                                                                                                                                                                                                                                                                                                                                                                                                                                                                                                                                                                                                                                                                                                                                                                                                                                                                                                                                                                                                                                                                                                                                                                                                                                                                                                                                                                                                                                                                                                                                                                                                                                                                                                                                                                                                                                                                                                                                                                                                                                                                                                                      | -2.567242 | 1.993024  |          |          |   |                                     |          |          |   |           |           |           |   |           |           |           |   |           |           |           |   |           |           |           |   |           |           |           |   |           |           |           |   |           |           |           |   |           |           |           |   |           |           |           |   |           |           |           |   |           |           |           |   |           |           |           |    |           |           |           |    |           |           |           |    |           |           |           |   |           |          |           |   |           |          |           |   |           |          |           |   |           |          |           |   |           |          |           |   |           |          |           |   |           |          |           |   |           |          |           |   |           |          |          |   |           |          |          |   |           |          |           |   |           |          |          |   |           |          |          |   |           |           |           |   |           |          |           |    |           |          |           |
| F                                                                                   | -4.848021                                                                                                                                                                                                                                                                                                                                                                                                                                                                                                                                                                                                                                                                                                                                                                                                                                                                                                                                                                                                                                                                                                                                                                                                                                                                                                                                                                                                                                                                                                                                                                                                                                                                                                                                                                                                                                                                                                                                                                                                                                                                                                                                                                                                                                                                                                                                                                                                                                                                                                                      | -2.637907 | -0.167305 |          |          |   |                                     |          |          |   |           |           |           |   |           |           |           |   |           |           |           |   |           |           |           |   |           |           |           |   |           |           |           |   |           |           |           |   |           |           |           |   |           |           |           |   |           |           |           |   |           |           |           |   |           |           |           |    |           |           |           |    |           |           |           |    |           |           |           |   |           |          |           |   |           |          |           |   |           |          |           |   |           |          |           |   |           |          |           |   |           |          |           |   |           |          |           |   |           |          |           |   |           |          |          |   |           |          |          |   |           |          |           |   |           |          |          |   |           |          |          |   |           |           |           |   |           |          |           |    |           |          |           |
| C                                                                                   | 1.563428                                                                                                                                                                                                                                                                                                                                                                                                                                                                                                                                                                                                                                                                                                                                                                                                                                                                                                                                                                                                                                                                                                                                                                                                                                                                                                                                                                                                                                                                                                                                                                                                                                                                                                                                                                                                                                                                                                                                                                                                                                                                                                                                                                                                                                                                                                                                                                                                                                                                                                                       | 0.635453  | -3.631991 |          |          |   |                                     |          |          |   |           |           |           |   |           |           |           |   |           |           |           |   |           |           |           |   |           |           |           |   |           |           |           |   |           |           |           |   |           |           |           |   |           |           |           |   |           |           |           |   |           |           |           |   |           |           |           |    |           |           |           |    |           |           |           |    |           |           |           |   |           |          |           |   |           |          |           |   |           |          |           |   |           |          |           |   |           |          |           |   |           |          |           |   |           |          |           |   |           |          |           |   |           |          |          |   |           |          |          |   |           |          |           |   |           |          |          |   |           |          |          |   |           |           |           |   |           |          |           |    |           |          |           |
| F                                                                                   | 1.513002                                                                                                                                                                                                                                                                                                                                                                                                                                                                                                                                                                                                                                                                                                                                                                                                                                                                                                                                                                                                                                                                                                                                                                                                                                                                                                                                                                                                                                                                                                                                                                                                                                                                                                                                                                                                                                                                                                                                                                                                                                                                                                                                                                                                                                                                                                                                                                                                                                                                                                                       | 1.053017  | -4.914052 |          |          |   |                                     |          |          |   |           |           |           |   |           |           |           |   |           |           |           |   |           |           |           |   |           |           |           |   |           |           |           |   |           |           |           |   |           |           |           |   |           |           |           |   |           |           |           |   |           |           |           |   |           |           |           |    |           |           |           |    |           |           |           |    |           |           |           |   |           |          |           |   |           |          |           |   |           |          |           |   |           |          |           |   |           |          |           |   |           |          |           |   |           |          |           |   |           |          |           |   |           |          |          |   |           |          |          |   |           |          |           |   |           |          |          |   |           |          |          |   |           |           |           |   |           |          |           |    |           |          |           |
| F                                                                                   | 2.096961                                                                                                                                                                                                                                                                                                                                                                                                                                                                                                                                                                                                                                                                                                                                                                                                                                                                                                                                                                                                                                                                                                                                                                                                                                                                                                                                                                                                                                                                                                                                                                                                                                                                                                                                                                                                                                                                                                                                                                                                                                                                                                                                                                                                                                                                                                                                                                                                                                                                                                                       | 1.674499  | -2.901769 |          |          |   |                                     |          |          |   |           |           |           |   |           |           |           |   |           |           |           |   |           |           |           |   |           |           |           |   |           |           |           |   |           |           |           |   |           |           |           |   |           |           |           |   |           |           |           |   |           |           |           |   |           |           |           |    |           |           |           |    |           |           |           |    |           |           |           |   |           |          |           |   |           |          |           |   |           |          |           |   |           |          |           |   |           |          |           |   |           |          |           |   |           |          |           |   |           |          |           |   |           |          |          |   |           |          |          |   |           |          |           |   |           |          |          |   |           |          |          |   |           |           |           |   |           |          |           |    |           |          |           |
| F                                                                                   | 2.443956                                                                                                                                                                                                                                                                                                                                                                                                                                                                                                                                                                                                                                                                                                                                                                                                                                                                                                                                                                                                                                                                                                                                                                                                                                                                                                                                                                                                                                                                                                                                                                                                                                                                                                                                                                                                                                                                                                                                                                                                                                                                                                                                                                                                                                                                                                                                                                                                                                                                                                                       | -0.384911 | -3.555243 |          |          |   |                                     |          |          |   |           |           |           |   |           |           |           |   |           |           |           |   |           |           |           |   |           |           |           |   |           |           |           |   |           |           |           |   |           |           |           |   |           |           |           |   |           |           |           |   |           |           |           |   |           |           |           |    |           |           |           |    |           |           |           |    |           |           |           |   |           |          |           |   |           |          |           |   |           |          |           |   |           |          |           |   |           |          |           |   |           |          |           |   |           |          |           |   |           |          |           |   |           |          |          |   |           |          |          |   |           |          |           |   |           |          |          |   |           |          |          |   |           |           |           |   |           |          |           |    |           |          |           |
| C                                                                                   | -3.440659                                                                                                                                                                                                                                                                                                                                                                                                                                                                                                                                                                                                                                                                                                                                                                                                                                                                                                                                                                                                                                                                                                                                                                                                                                                                                                                                                                                                                                                                                                                                                                                                                                                                                                                                                                                                                                                                                                                                                                                                                                                                                                                                                                                                                                                                                                                                                                                                                                                                                                                      | 0.287548  | -2.417081 |          |          |   |                                     |          |          |   |           |           |           |   |           |           |           |   |           |           |           |   |           |           |           |   |           |           |           |   |           |           |           |   |           |           |           |   |           |           |           |   |           |           |           |   |           |           |           |   |           |           |           |   |           |           |           |    |           |           |           |    |           |           |           |    |           |           |           |   |           |          |           |   |           |          |           |   |           |          |           |   |           |          |           |   |           |          |           |   |           |          |           |   |           |          |           |   |           |          |           |   |           |          |          |   |           |          |          |   |           |          |           |   |           |          |          |   |           |          |          |   |           |           |           |   |           |          |           |    |           |          |           |
| F                                                                                   | -3.726755                                                                                                                                                                                                                                                                                                                                                                                                                                                                                                                                                                                                                                                                                                                                                                                                                                                                                                                                                                                                                                                                                                                                                                                                                                                                                                                                                                                                                                                                                                                                                                                                                                                                                                                                                                                                                                                                                                                                                                                                                                                                                                                                                                                                                                                                                                                                                                                                                                                                                                                      | 1.161526  | -1.411117 |          |          |   |                                     |          |          |   |           |           |           |   |           |           |           |   |           |           |           |   |           |           |           |   |           |           |           |   |           |           |           |   |           |           |           |   |           |           |           |   |           |           |           |   |           |           |           |   |           |           |           |   |           |           |           |    |           |           |           |    |           |           |           |    |           |           |           |   |           |          |           |   |           |          |           |   |           |          |           |   |           |          |           |   |           |          |           |   |           |          |           |   |           |          |           |   |           |          |           |   |           |          |          |   |           |          |          |   |           |          |           |   |           |          |          |   |           |          |          |   |           |           |           |   |           |          |           |    |           |          |           |
| F                                                                                   | -3.999074                                                                                                                                                                                                                                                                                                                                                                                                                                                                                                                                                                                                                                                                                                                                                                                                                                                                                                                                                                                                                                                                                                                                                                                                                                                                                                                                                                                                                                                                                                                                                                                                                                                                                                                                                                                                                                                                                                                                                                                                                                                                                                                                                                                                                                                                                                                                                                                                                                                                                                                      | 0.775986  | -3.543288 |          |          |   |                                     |          |          |   |           |           |           |   |           |           |           |   |           |           |           |   |           |           |           |   |           |           |           |   |           |           |           |   |           |           |           |   |           |           |           |   |           |           |           |   |           |           |           |   |           |           |           |   |           |           |           |    |           |           |           |    |           |           |           |    |           |           |           |   |           |          |           |   |           |          |           |   |           |          |           |   |           |          |           |   |           |          |           |   |           |          |           |   |           |          |           |   |           |          |           |   |           |          |          |   |           |          |          |   |           |          |           |   |           |          |          |   |           |          |          |   |           |           |           |   |           |          |           |    |           |          |           |
| F                                                                                   | -4.062585                                                                                                                                                                                                                                                                                                                                                                                                                                                                                                                                                                                                                                                                                                                                                                                                                                                                                                                                                                                                                                                                                                                                                                                                                                                                                                                                                                                                                                                                                                                                                                                                                                                                                                                                                                                                                                                                                                                                                                                                                                                                                                                                                                                                                                                                                                                                                                                                                                                                                                                      | -0.877724 | -2.117798 |          |          |   |                                     |          |          |   |           |           |           |   |           |           |           |   |           |           |           |   |           |           |           |   |           |           |           |   |           |           |           |   |           |           |           |   |           |           |           |   |           |           |           |   |           |           |           |   |           |           |           |   |           |           |           |    |           |           |           |    |           |           |           |    |           |           |           |   |           |          |           |   |           |          |           |   |           |          |           |   |           |          |           |   |           |          |           |   |           |          |           |   |           |          |           |   |           |          |           |   |           |          |          |   |           |          |          |   |           |          |           |   |           |          |          |   |           |          |          |   |           |           |           |   |           |          |           |    |           |          |           |
| Br                                                                                  | -1.432905                                                                                                                                                                                                                                                                                                                                                                                                                                                                                                                                                                                                                                                                                                                                                                                                                                                                                                                                                                                                                                                                                                                                                                                                                                                                                                                                                                                                                                                                                                                                                                                                                                                                                                                                                                                                                                                                                                                                                                                                                                                                                                                                                                                                                                                                                                                                                                                                                                                                                                                      | 2.282055  | -4.518970 |          |          |   |                                     |          |          |   |           |           |           |   |           |           |           |   |           |           |           |   |           |           |           |   |           |           |           |   |           |           |           |   |           |           |           |   |           |           |           |   |           |           |           |   |           |           |           |   |           |           |           |   |           |           |           |    |           |           |           |    |           |           |           |    |           |           |           |   |           |          |           |   |           |          |           |   |           |          |           |   |           |          |           |   |           |          |           |   |           |          |           |   |           |          |           |   |           |          |           |   |           |          |          |   |           |          |          |   |           |          |           |   |           |          |          |   |           |          |          |   |           |           |           |   |           |          |           |    |           |          |           |
| Br                                                                                  | 2.626562                                                                                                                                                                                                                                                                                                                                                                                                                                                                                                                                                                                                                                                                                                                                                                                                                                                                                                                                                                                                                                                                                                                                                                                                                                                                                                                                                                                                                                                                                                                                                                                                                                                                                                                                                                                                                                                                                                                                                                                                                                                                                                                                                                                                                                                                                                                                                                                                                                                                                                                       | -5.047733 | 0.698418  |          |          |   |                                     |          |          |   |           |           |           |   |           |           |           |   |           |           |           |   |           |           |           |   |           |           |           |   |           |           |           |   |           |           |           |   |           |           |           |   |           |           |           |   |           |           |           |   |           |           |           |   |           |           |           |    |           |           |           |    |           |           |           |    |           |           |           |   |           |          |           |   |           |          |           |   |           |          |           |   |           |          |           |   |           |          |           |   |           |          |           |   |           |          |           |   |           |          |           |   |           |          |          |   |           |          |          |   |           |          |           |   |           |          |          |   |           |          |          |   |           |           |           |   |           |          |           |    |           |          |           |
| Br                                                                                  | -5.150386                                                                                                                                                                                                                                                                                                                                                                                                                                                                                                                                                                                                                                                                                                                                                                                                                                                                                                                                                                                                                                                                                                                                                                                                                                                                                                                                                                                                                                                                                                                                                                                                                                                                                                                                                                                                                                                                                                                                                                                                                                                                                                                                                                                                                                                                                                                                                                                                                                                                                                                      | 0.304329  | 3.080633  |          |          |   |                                     |          |          |   |           |           |           |   |           |           |           |   |           |           |           |   |           |           |           |   |           |           |           |   |           |           |           |   |           |           |           |   |           |           |           |   |           |           |           |   |           |           |           |   |           |           |           |   |           |           |           |    |           |           |           |    |           |           |           |    |           |           |           |   |           |          |           |   |           |          |           |   |           |          |           |   |           |          |           |   |           |          |           |   |           |          |           |   |           |          |           |   |           |          |           |   |           |          |          |   |           |          |          |   |           |          |           |   |           |          |          |   |           |          |          |   |           |           |           |   |           |          |           |    |           |          |           |
| C                                                                                   | 4.612873                                                                                                                                                                                                                                                                                                                                                                                                                                                                                                                                                                                                                                                                                                                                                                                                                                                                                                                                                                                                                                                                                                                                                                                                                                                                                                                                                                                                                                                                                                                                                                                                                                                                                                                                                                                                                                                                                                                                                                                                                                                                                                                                                                                                                                                                                                                                                                                                                                                                                                                       | 3.026002  | -0.463097 |          |          |   |                                     |          |          |   |           |           |           |   |           |           |           |   |           |           |           |   |           |           |           |   |           |           |           |   |           |           |           |   |           |           |           |   |           |           |           |   |           |           |           |   |           |           |           |   |           |           |           |   |           |           |           |    |           |           |           |    |           |           |           |    |           |           |           |   |           |          |           |   |           |          |           |   |           |          |           |   |           |          |           |   |           |          |           |   |           |          |           |   |           |          |           |   |           |          |           |   |           |          |          |   |           |          |          |   |           |          |           |   |           |          |          |   |           |          |          |   |           |           |           |   |           |          |           |    |           |          |           |
| H                                                                                   | 4.227187                                                                                                                                                                                                                                                                                                                                                                                                                                                                                                                                                                                                                                                                                                                                                                                                                                                                                                                                                                                                                                                                                                                                                                                                                                                                                                                                                                                                                                                                                                                                                                                                                                                                                                                                                                                                                                                                                                                                                                                                                                                                                                                                                                                                                                                                                                                                                                                                                                                                                                                       | 3.706129  | 0.326436  |          |          |   |                                     |          |          |   |           |           |           |   |           |           |           |   |           |           |           |   |           |           |           |   |           |           |           |   |           |           |           |   |           |           |           |   |           |           |           |   |           |           |           |   |           |           |           |   |           |           |           |   |           |           |           |    |           |           |           |    |           |           |           |    |           |           |           |   |           |          |           |   |           |          |           |   |           |          |           |   |           |          |           |   |           |          |           |   |           |          |           |   |           |          |           |   |           |          |           |   |           |          |          |   |           |          |          |   |           |          |           |   |           |          |          |   |           |          |          |   |           |           |           |   |           |          |           |    |           |          |           |
| H                                                                                   | 5.339162                                                                                                                                                                                                                                                                                                                                                                                                                                                                                                                                                                                                                                                                                                                                                                                                                                                                                                                                                                                                                                                                                                                                                                                                                                                                                                                                                                                                                                                                                                                                                                                                                                                                                                                                                                                                                                                                                                                                                                                                                                                                                                                                                                                                                                                                                                                                                                                                                                                                                                                       | 3.584510  | -1.091632 |          |          |   |                                     |          |          |   |           |           |           |   |           |           |           |   |           |           |           |   |           |           |           |   |           |           |           |   |           |           |           |   |           |           |           |   |           |           |           |   |           |           |           |   |           |           |           |   |           |           |           |   |           |           |           |    |           |           |           |    |           |           |           |    |           |           |           |   |           |          |           |   |           |          |           |   |           |          |           |   |           |          |           |   |           |          |           |   |           |          |           |   |           |          |           |   |           |          |           |   |           |          |          |   |           |          |          |   |           |          |           |   |           |          |          |   |           |          |          |   |           |           |           |   |           |          |           |    |           |          |           |
| H                                                                                   | 3.765730                                                                                                                                                                                                                                                                                                                                                                                                                                                                                                                                                                                                                                                                                                                                                                                                                                                                                                                                                                                                                                                                                                                                                                                                                                                                                                                                                                                                                                                                                                                                                                                                                                                                                                                                                                                                                                                                                                                                                                                                                                                                                                                                                                                                                                                                                                                                                                                                                                                                                                                       | 2.716159  | -1.100103 |          |          |   |                                     |          |          |   |           |           |           |   |           |           |           |   |           |           |           |   |           |           |           |   |           |           |           |   |           |           |           |   |           |           |           |   |           |           |           |   |           |           |           |   |           |           |           |   |           |           |           |   |           |           |           |    |           |           |           |    |           |           |           |    |           |           |           |   |           |          |           |   |           |          |           |   |           |          |           |   |           |          |           |   |           |          |           |   |           |          |           |   |           |          |           |   |           |          |           |   |           |          |          |   |           |          |          |   |           |          |           |   |           |          |          |   |           |          |          |   |           |           |           |   |           |          |           |    |           |          |           |
| C                                                                                   | 6.655913                                                                                                                                                                                                                                                                                                                                                                                                                                                                                                                                                                                                                                                                                                                                                                                                                                                                                                                                                                                                                                                                                                                                                                                                                                                                                                                                                                                                                                                                                                                                                                                                                                                                                                                                                                                                                                                                                                                                                                                                                                                                                                                                                                                                                                                                                                                                                                                                                                                                                                                       | 2.085001  | 0.535879  |          |          |   |                                     |          |          |   |           |           |           |   |           |           |           |   |           |           |           |   |           |           |           |   |           |           |           |   |           |           |           |   |           |           |           |   |           |           |           |   |           |           |           |   |           |           |           |   |           |           |           |   |           |           |           |    |           |           |           |    |           |           |           |    |           |           |           |   |           |          |           |   |           |          |           |   |           |          |           |   |           |          |           |   |           |          |           |   |           |          |           |   |           |          |           |   |           |          |           |   |           |          |          |   |           |          |          |   |           |          |           |   |           |          |          |   |           |          |          |   |           |           |           |   |           |          |           |    |           |          |           |
| H                                                                                   | 6.729490                                                                                                                                                                                                                                                                                                                                                                                                                                                                                                                                                                                                                                                                                                                                                                                                                                                                                                                                                                                                                                                                                                                                                                                                                                                                                                                                                                                                                                                                                                                                                                                                                                                                                                                                                                                                                                                                                                                                                                                                                                                                                                                                                                                                                                                                                                                                                                                                                                                                                                                       | 3.112145  | 0.943219  |          |          |   |                                     |          |          |   |           |           |           |   |           |           |           |   |           |           |           |   |           |           |           |   |           |           |           |   |           |           |           |   |           |           |           |   |           |           |           |   |           |           |           |   |           |           |           |   |           |           |           |   |           |           |           |    |           |           |           |    |           |           |           |    |           |           |           |   |           |          |           |   |           |          |           |   |           |          |           |   |           |          |           |   |           |          |           |   |           |          |           |   |           |          |           |   |           |          |           |   |           |          |          |   |           |          |          |   |           |          |           |   |           |          |          |   |           |          |          |   |           |           |           |   |           |          |           |    |           |          |           |
| H                                                                                   | 6.936394                                                                                                                                                                                                                                                                                                                                                                                                                                                                                                                                                                                                                                                                                                                                                                                                                                                                                                                                                                                                                                                                                                                                                                                                                                                                                                                                                                                                                                                                                                                                                                                                                                                                                                                                                                                                                                                                                                                                                                                                                                                                                                                                                                                                                                                                                                                                                                                                                                                                                                                       | 1.380327  | 1.342663  |          |          |   |                                     |          |          |   |           |           |           |   |           |           |           |   |           |           |           |   |           |           |           |   |           |           |           |   |           |           |           |   |           |           |           |   |           |           |           |   |           |           |           |   |           |           |           |   |           |           |           |   |           |           |           |    |           |           |           |    |           |           |           |    |           |           |           |   |           |          |           |   |           |          |           |   |           |          |           |   |           |          |           |   |           |          |           |   |           |          |           |   |           |          |           |   |           |          |           |   |           |          |          |   |           |          |          |   |           |          |           |   |           |          |          |   |           |          |          |   |           |           |           |   |           |          |           |    |           |          |           |
| H                                                                                   | 7.386670                                                                                                                                                                                                                                                                                                                                                                                                                                                                                                                                                                                                                                                                                                                                                                                                                                                                                                                                                                                                                                                                                                                                                                                                                                                                                                                                                                                                                                                                                                                                                                                                                                                                                                                                                                                                                                                                                                                                                                                                                                                                                                                                                                                                                                                                                                                                                                                                                                                                                                                       | 1.986494  | -0.299339 |          |          |   |                                     |          |          |   |           |           |           |   |           |           |           |   |           |           |           |   |           |           |           |   |           |           |           |   |           |           |           |   |           |           |           |   |           |           |           |   |           |           |           |   |           |           |           |   |           |           |           |   |           |           |           |    |           |           |           |    |           |           |           |    |           |           |           |   |           |          |           |   |           |          |           |   |           |          |           |   |           |          |           |   |           |          |           |   |           |          |           |   |           |          |           |   |           |          |           |   |           |          |          |   |           |          |          |   |           |          |           |   |           |          |          |   |           |          |          |   |           |           |           |   |           |          |           |    |           |          |           |
| N                                                                                   | 5.282258                                                                                                                                                                                                                                                                                                                                                                                                                                                                                                                                                                                                                                                                                                                                                                                                                                                                                                                                                                                                                                                                                                                                                                                                                                                                                                                                                                                                                                                                                                                                                                                                                                                                                                                                                                                                                                                                                                                                                                                                                                                                                                                                                                                                                                                                                                                                                                                                                                                                                                                       | 1.852430  | 0.095903  |          |          |   |                                     |          |          |   |           |           |           |   |           |           |           |   |           |           |           |   |           |           |           |   |           |           |           |   |           |           |           |   |           |           |           |   |           |           |           |   |           |           |           |   |           |           |           |   |           |           |           |   |           |           |           |    |           |           |           |    |           |           |           |    |           |           |           |   |           |          |           |   |           |          |           |   |           |          |           |   |           |          |           |   |           |          |           |   |           |          |           |   |           |          |           |   |           |          |           |   |           |          |          |   |           |          |          |   |           |          |           |   |           |          |          |   |           |          |          |   |           |           |           |   |           |          |           |    |           |          |           |
| 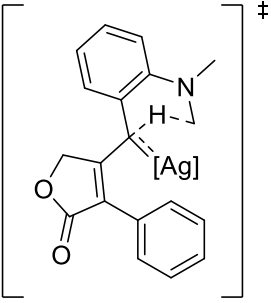 | <table> <tbody> <tr><td>84</td><td></td><td></td><td></td></tr> <tr><td></td><td colspan="3">TS-FG SCF Done: -11529.1676287 A.U.</td></tr> <tr><td>C</td><td>-3.716551</td><td>-2.945368</td><td>-0.125062</td></tr> <tr><td>C</td><td>-3.910546</td><td>-4.345093</td><td>-0.113623</td></tr> <tr><td>C</td><td>-2.947248</td><td>-5.195299</td><td>-0.665467</td></tr> <tr><td>C</td><td>-1.752425</td><td>-4.661144</td><td>-1.185072</td></tr> <tr><td>C</td><td>-1.545719</td><td>-3.278110</td><td>-1.185562</td></tr> <tr><td>C</td><td>-2.545027</td><td>-2.377005</td><td>-0.746550</td></tr> <tr><td>H</td><td>-4.820162</td><td>-4.765385</td><td>0.338857</td></tr> <tr><td>H</td><td>-3.115647</td><td>-6.282994</td><td>-0.663272</td></tr> <tr><td>H</td><td>-0.973655</td><td>-5.321791</td><td>-1.594267</td></tr> <tr><td>H</td><td>-0.611418</td><td>-2.863760</td><td>-1.583141</td></tr> <tr><td>C</td><td>-2.373256</td><td>-0.923403</td><td>-0.903513</td></tr> <tr><td>C</td><td>-2.969884</td><td>-0.292578</td><td>-2.070772</td></tr> <tr><td>C</td><td>-2.966627</td><td>-1.044816</td><td>-3.390159</td></tr> <tr><td>H</td><td>-1.946473</td><td>-1.357894</td><td>-3.700007</td></tr> <tr><td>H</td><td>-3.593464</td><td>-1.964469</td><td>-3.309122</td></tr> <tr><td>C</td><td>-3.949760</td><td>1.005745</td><td>-3.729657</td></tr> <tr><td>C</td><td>-3.597806</td><td>0.928302</td><td>-2.274244</td></tr> <tr><td>C</td><td>-3.931782</td><td>1.996419</td><td>-1.319341</td></tr> <tr><td>C</td><td>-4.976212</td><td>2.917943</td><td>-1.610359</td></tr> <tr><td>C</td><td>-3.246653</td><td>2.144602</td><td>-0.082325</td></tr> <tr><td>C</td><td>-5.327213</td><td>3.917311</td><td>-0.693075</td></tr> <tr><td>H</td><td>-5.498308</td><td>2.845549</td><td>-2.573699</td></tr> <tr><td>C</td><td>-3.596605</td><td>3.151939</td><td>0.827700</td></tr> <tr><td>H</td><td>-2.395789</td><td>1.491654</td><td>0.162795</td></tr> <tr><td>C</td><td>-4.646273</td><td>4.038180</td><td>0.532877</td></tr> <tr><td>H</td><td>-6.142216</td><td>4.615559</td><td>-0.941839</td></tr> <tr><td>H</td><td>-3.029084</td><td>3.246825</td><td>1.765253</td></tr> <tr><td>H</td><td>-4.925807</td><td>4.826474</td><td>1.249748</td></tr> <tr><td>O</td><td>-3.512597</td><td>-0.155244</td><td>-4.351478</td></tr> <tr><td>O</td><td>-4.505375</td><td>1.881532</td><td>-4.358097</td></tr> <tr><td>Ag</td><td>-0.490482</td><td>0.013541</td><td>-0.780142</td></tr> </tbody> </table> | 84        |           |          |          |   | TS-FG SCF Done: -11529.1676287 A.U. |          |          | C | -3.716551 | -2.945368 | -0.125062 | C | -3.910546 | -4.345093 | -0.113623 | C | -2.947248 | -5.195299 | -0.665467 | C | -1.752425 | -4.661144 | -1.185072 | C | -1.545719 | -3.278110 | -1.185562 | C | -2.545027 | -2.377005 | -0.746550 | H | -4.820162 | -4.765385 | 0.338857  | H | -3.115647 | -6.282994 | -0.663272 | H | -0.973655 | -5.321791 | -1.594267 | H | -0.611418 | -2.863760 | -1.583141 | C | -2.373256 | -0.923403 | -0.903513 | C | -2.969884 | -0.292578 | -2.070772 | C  | -2.966627 | -1.044816 | -3.390159 | H  | -1.946473 | -1.357894 | -3.700007 | H  | -3.593464 | -1.964469 | -3.309122 | C | -3.949760 | 1.005745 | -3.729657 | C | -3.597806 | 0.928302 | -2.274244 | C | -3.931782 | 1.996419 | -1.319341 | C | -4.976212 | 2.917943 | -1.610359 | C | -3.246653 | 2.144602 | -0.082325 | C | -5.327213 | 3.917311 | -0.693075 | H | -5.498308 | 2.845549 | -2.573699 | C | -3.596605 | 3.151939 | 0.827700  | H | -2.395789 | 1.491654 | 0.162795 | C | -4.646273 | 4.038180 | 0.532877 | H | -6.142216 | 4.615559 | -0.941839 | H | -3.029084 | 3.246825 | 1.765253 | H | -4.925807 | 4.826474 | 1.249748 | O | -3.512597 | -0.155244 | -4.351478 | O | -4.505375 | 1.881532 | -4.358097 | Ag | -0.490482 | 0.013541 | -0.780142 |
| 84                                                                                  |                                                                                                                                                                                                                                                                                                                                                                                                                                                                                                                                                                                                                                                                                                                                                                                                                                                                                                                                                                                                                                                                                                                                                                                                                                                                                                                                                                                                                                                                                                                                                                                                                                                                                                                                                                                                                                                                                                                                                                                                                                                                                                                                                                                                                                                                                                                                                                                                                                                                                                                                |           |           |          |          |   |                                     |          |          |   |           |           |           |   |           |           |           |   |           |           |           |   |           |           |           |   |           |           |           |   |           |           |           |   |           |           |           |   |           |           |           |   |           |           |           |   |           |           |           |   |           |           |           |   |           |           |           |    |           |           |           |    |           |           |           |    |           |           |           |   |           |          |           |   |           |          |           |   |           |          |           |   |           |          |           |   |           |          |           |   |           |          |           |   |           |          |           |   |           |          |           |   |           |          |          |   |           |          |          |   |           |          |           |   |           |          |          |   |           |          |          |   |           |           |           |   |           |          |           |    |           |          |           |
|                                                                                     | TS-FG SCF Done: -11529.1676287 A.U.                                                                                                                                                                                                                                                                                                                                                                                                                                                                                                                                                                                                                                                                                                                                                                                                                                                                                                                                                                                                                                                                                                                                                                                                                                                                                                                                                                                                                                                                                                                                                                                                                                                                                                                                                                                                                                                                                                                                                                                                                                                                                                                                                                                                                                                                                                                                                                                                                                                                                            |           |           |          |          |   |                                     |          |          |   |           |           |           |   |           |           |           |   |           |           |           |   |           |           |           |   |           |           |           |   |           |           |           |   |           |           |           |   |           |           |           |   |           |           |           |   |           |           |           |   |           |           |           |   |           |           |           |    |           |           |           |    |           |           |           |    |           |           |           |   |           |          |           |   |           |          |           |   |           |          |           |   |           |          |           |   |           |          |           |   |           |          |           |   |           |          |           |   |           |          |           |   |           |          |          |   |           |          |          |   |           |          |           |   |           |          |          |   |           |          |          |   |           |           |           |   |           |          |           |    |           |          |           |
| C                                                                                   | -3.716551                                                                                                                                                                                                                                                                                                                                                                                                                                                                                                                                                                                                                                                                                                                                                                                                                                                                                                                                                                                                                                                                                                                                                                                                                                                                                                                                                                                                                                                                                                                                                                                                                                                                                                                                                                                                                                                                                                                                                                                                                                                                                                                                                                                                                                                                                                                                                                                                                                                                                                                      | -2.945368 | -0.125062 |          |          |   |                                     |          |          |   |           |           |           |   |           |           |           |   |           |           |           |   |           |           |           |   |           |           |           |   |           |           |           |   |           |           |           |   |           |           |           |   |           |           |           |   |           |           |           |   |           |           |           |   |           |           |           |    |           |           |           |    |           |           |           |    |           |           |           |   |           |          |           |   |           |          |           |   |           |          |           |   |           |          |           |   |           |          |           |   |           |          |           |   |           |          |           |   |           |          |           |   |           |          |          |   |           |          |          |   |           |          |           |   |           |          |          |   |           |          |          |   |           |           |           |   |           |          |           |    |           |          |           |
| C                                                                                   | -3.910546                                                                                                                                                                                                                                                                                                                                                                                                                                                                                                                                                                                                                                                                                                                                                                                                                                                                                                                                                                                                                                                                                                                                                                                                                                                                                                                                                                                                                                                                                                                                                                                                                                                                                                                                                                                                                                                                                                                                                                                                                                                                                                                                                                                                                                                                                                                                                                                                                                                                                                                      | -4.345093 | -0.113623 |          |          |   |                                     |          |          |   |           |           |           |   |           |           |           |   |           |           |           |   |           |           |           |   |           |           |           |   |           |           |           |   |           |           |           |   |           |           |           |   |           |           |           |   |           |           |           |   |           |           |           |   |           |           |           |    |           |           |           |    |           |           |           |    |           |           |           |   |           |          |           |   |           |          |           |   |           |          |           |   |           |          |           |   |           |          |           |   |           |          |           |   |           |          |           |   |           |          |           |   |           |          |          |   |           |          |          |   |           |          |           |   |           |          |          |   |           |          |          |   |           |           |           |   |           |          |           |    |           |          |           |
| C                                                                                   | -2.947248                                                                                                                                                                                                                                                                                                                                                                                                                                                                                                                                                                                                                                                                                                                                                                                                                                                                                                                                                                                                                                                                                                                                                                                                                                                                                                                                                                                                                                                                                                                                                                                                                                                                                                                                                                                                                                                                                                                                                                                                                                                                                                                                                                                                                                                                                                                                                                                                                                                                                                                      | -5.195299 | -0.665467 |          |          |   |                                     |          |          |   |           |           |           |   |           |           |           |   |           |           |           |   |           |           |           |   |           |           |           |   |           |           |           |   |           |           |           |   |           |           |           |   |           |           |           |   |           |           |           |   |           |           |           |   |           |           |           |    |           |           |           |    |           |           |           |    |           |           |           |   |           |          |           |   |           |          |           |   |           |          |           |   |           |          |           |   |           |          |           |   |           |          |           |   |           |          |           |   |           |          |           |   |           |          |          |   |           |          |          |   |           |          |           |   |           |          |          |   |           |          |          |   |           |           |           |   |           |          |           |    |           |          |           |
| C                                                                                   | -1.752425                                                                                                                                                                                                                                                                                                                                                                                                                                                                                                                                                                                                                                                                                                                                                                                                                                                                                                                                                                                                                                                                                                                                                                                                                                                                                                                                                                                                                                                                                                                                                                                                                                                                                                                                                                                                                                                                                                                                                                                                                                                                                                                                                                                                                                                                                                                                                                                                                                                                                                                      | -4.661144 | -1.185072 |          |          |   |                                     |          |          |   |           |           |           |   |           |           |           |   |           |           |           |   |           |           |           |   |           |           |           |   |           |           |           |   |           |           |           |   |           |           |           |   |           |           |           |   |           |           |           |   |           |           |           |   |           |           |           |    |           |           |           |    |           |           |           |    |           |           |           |   |           |          |           |   |           |          |           |   |           |          |           |   |           |          |           |   |           |          |           |   |           |          |           |   |           |          |           |   |           |          |           |   |           |          |          |   |           |          |          |   |           |          |           |   |           |          |          |   |           |          |          |   |           |           |           |   |           |          |           |    |           |          |           |
| C                                                                                   | -1.545719                                                                                                                                                                                                                                                                                                                                                                                                                                                                                                                                                                                                                                                                                                                                                                                                                                                                                                                                                                                                                                                                                                                                                                                                                                                                                                                                                                                                                                                                                                                                                                                                                                                                                                                                                                                                                                                                                                                                                                                                                                                                                                                                                                                                                                                                                                                                                                                                                                                                                                                      | -3.278110 | -1.185562 |          |          |   |                                     |          |          |   |           |           |           |   |           |           |           |   |           |           |           |   |           |           |           |   |           |           |           |   |           |           |           |   |           |           |           |   |           |           |           |   |           |           |           |   |           |           |           |   |           |           |           |   |           |           |           |    |           |           |           |    |           |           |           |    |           |           |           |   |           |          |           |   |           |          |           |   |           |          |           |   |           |          |           |   |           |          |           |   |           |          |           |   |           |          |           |   |           |          |           |   |           |          |          |   |           |          |          |   |           |          |           |   |           |          |          |   |           |          |          |   |           |           |           |   |           |          |           |    |           |          |           |
| C                                                                                   | -2.545027                                                                                                                                                                                                                                                                                                                                                                                                                                                                                                                                                                                                                                                                                                                                                                                                                                                                                                                                                                                                                                                                                                                                                                                                                                                                                                                                                                                                                                                                                                                                                                                                                                                                                                                                                                                                                                                                                                                                                                                                                                                                                                                                                                                                                                                                                                                                                                                                                                                                                                                      | -2.377005 | -0.746550 |          |          |   |                                     |          |          |   |           |           |           |   |           |           |           |   |           |           |           |   |           |           |           |   |           |           |           |   |           |           |           |   |           |           |           |   |           |           |           |   |           |           |           |   |           |           |           |   |           |           |           |   |           |           |           |    |           |           |           |    |           |           |           |    |           |           |           |   |           |          |           |   |           |          |           |   |           |          |           |   |           |          |           |   |           |          |           |   |           |          |           |   |           |          |           |   |           |          |           |   |           |          |          |   |           |          |          |   |           |          |           |   |           |          |          |   |           |          |          |   |           |           |           |   |           |          |           |    |           |          |           |
| H                                                                                   | -4.820162                                                                                                                                                                                                                                                                                                                                                                                                                                                                                                                                                                                                                                                                                                                                                                                                                                                                                                                                                                                                                                                                                                                                                                                                                                                                                                                                                                                                                                                                                                                                                                                                                                                                                                                                                                                                                                                                                                                                                                                                                                                                                                                                                                                                                                                                                                                                                                                                                                                                                                                      | -4.765385 | 0.338857  |          |          |   |                                     |          |          |   |           |           |           |   |           |           |           |   |           |           |           |   |           |           |           |   |           |           |           |   |           |           |           |   |           |           |           |   |           |           |           |   |           |           |           |   |           |           |           |   |           |           |           |   |           |           |           |    |           |           |           |    |           |           |           |    |           |           |           |   |           |          |           |   |           |          |           |   |           |          |           |   |           |          |           |   |           |          |           |   |           |          |           |   |           |          |           |   |           |          |           |   |           |          |          |   |           |          |          |   |           |          |           |   |           |          |          |   |           |          |          |   |           |           |           |   |           |          |           |    |           |          |           |
| H                                                                                   | -3.115647                                                                                                                                                                                                                                                                                                                                                                                                                                                                                                                                                                                                                                                                                                                                                                                                                                                                                                                                                                                                                                                                                                                                                                                                                                                                                                                                                                                                                                                                                                                                                                                                                                                                                                                                                                                                                                                                                                                                                                                                                                                                                                                                                                                                                                                                                                                                                                                                                                                                                                                      | -6.282994 | -0.663272 |          |          |   |                                     |          |          |   |           |           |           |   |           |           |           |   |           |           |           |   |           |           |           |   |           |           |           |   |           |           |           |   |           |           |           |   |           |           |           |   |           |           |           |   |           |           |           |   |           |           |           |   |           |           |           |    |           |           |           |    |           |           |           |    |           |           |           |   |           |          |           |   |           |          |           |   |           |          |           |   |           |          |           |   |           |          |           |   |           |          |           |   |           |          |           |   |           |          |           |   |           |          |          |   |           |          |          |   |           |          |           |   |           |          |          |   |           |          |          |   |           |           |           |   |           |          |           |    |           |          |           |
| H                                                                                   | -0.973655                                                                                                                                                                                                                                                                                                                                                                                                                                                                                                                                                                                                                                                                                                                                                                                                                                                                                                                                                                                                                                                                                                                                                                                                                                                                                                                                                                                                                                                                                                                                                                                                                                                                                                                                                                                                                                                                                                                                                                                                                                                                                                                                                                                                                                                                                                                                                                                                                                                                                                                      | -5.321791 | -1.594267 |          |          |   |                                     |          |          |   |           |           |           |   |           |           |           |   |           |           |           |   |           |           |           |   |           |           |           |   |           |           |           |   |           |           |           |   |           |           |           |   |           |           |           |   |           |           |           |   |           |           |           |   |           |           |           |    |           |           |           |    |           |           |           |    |           |           |           |   |           |          |           |   |           |          |           |   |           |          |           |   |           |          |           |   |           |          |           |   |           |          |           |   |           |          |           |   |           |          |           |   |           |          |          |   |           |          |          |   |           |          |           |   |           |          |          |   |           |          |          |   |           |           |           |   |           |          |           |    |           |          |           |
| H                                                                                   | -0.611418                                                                                                                                                                                                                                                                                                                                                                                                                                                                                                                                                                                                                                                                                                                                                                                                                                                                                                                                                                                                                                                                                                                                                                                                                                                                                                                                                                                                                                                                                                                                                                                                                                                                                                                                                                                                                                                                                                                                                                                                                                                                                                                                                                                                                                                                                                                                                                                                                                                                                                                      | -2.863760 | -1.583141 |          |          |   |                                     |          |          |   |           |           |           |   |           |           |           |   |           |           |           |   |           |           |           |   |           |           |           |   |           |           |           |   |           |           |           |   |           |           |           |   |           |           |           |   |           |           |           |   |           |           |           |   |           |           |           |    |           |           |           |    |           |           |           |    |           |           |           |   |           |          |           |   |           |          |           |   |           |          |           |   |           |          |           |   |           |          |           |   |           |          |           |   |           |          |           |   |           |          |           |   |           |          |          |   |           |          |          |   |           |          |           |   |           |          |          |   |           |          |          |   |           |           |           |   |           |          |           |    |           |          |           |
| C                                                                                   | -2.373256                                                                                                                                                                                                                                                                                                                                                                                                                                                                                                                                                                                                                                                                                                                                                                                                                                                                                                                                                                                                                                                                                                                                                                                                                                                                                                                                                                                                                                                                                                                                                                                                                                                                                                                                                                                                                                                                                                                                                                                                                                                                                                                                                                                                                                                                                                                                                                                                                                                                                                                      | -0.923403 | -0.903513 |          |          |   |                                     |          |          |   |           |           |           |   |           |           |           |   |           |           |           |   |           |           |           |   |           |           |           |   |           |           |           |   |           |           |           |   |           |           |           |   |           |           |           |   |           |           |           |   |           |           |           |   |           |           |           |    |           |           |           |    |           |           |           |    |           |           |           |   |           |          |           |   |           |          |           |   |           |          |           |   |           |          |           |   |           |          |           |   |           |          |           |   |           |          |           |   |           |          |           |   |           |          |          |   |           |          |          |   |           |          |           |   |           |          |          |   |           |          |          |   |           |           |           |   |           |          |           |    |           |          |           |
| C                                                                                   | -2.969884                                                                                                                                                                                                                                                                                                                                                                                                                                                                                                                                                                                                                                                                                                                                                                                                                                                                                                                                                                                                                                                                                                                                                                                                                                                                                                                                                                                                                                                                                                                                                                                                                                                                                                                                                                                                                                                                                                                                                                                                                                                                                                                                                                                                                                                                                                                                                                                                                                                                                                                      | -0.292578 | -2.070772 |          |          |   |                                     |          |          |   |           |           |           |   |           |           |           |   |           |           |           |   |           |           |           |   |           |           |           |   |           |           |           |   |           |           |           |   |           |           |           |   |           |           |           |   |           |           |           |   |           |           |           |   |           |           |           |    |           |           |           |    |           |           |           |    |           |           |           |   |           |          |           |   |           |          |           |   |           |          |           |   |           |          |           |   |           |          |           |   |           |          |           |   |           |          |           |   |           |          |           |   |           |          |          |   |           |          |          |   |           |          |           |   |           |          |          |   |           |          |          |   |           |           |           |   |           |          |           |    |           |          |           |
| C                                                                                   | -2.966627                                                                                                                                                                                                                                                                                                                                                                                                                                                                                                                                                                                                                                                                                                                                                                                                                                                                                                                                                                                                                                                                                                                                                                                                                                                                                                                                                                                                                                                                                                                                                                                                                                                                                                                                                                                                                                                                                                                                                                                                                                                                                                                                                                                                                                                                                                                                                                                                                                                                                                                      | -1.044816 | -3.390159 |          |          |   |                                     |          |          |   |           |           |           |   |           |           |           |   |           |           |           |   |           |           |           |   |           |           |           |   |           |           |           |   |           |           |           |   |           |           |           |   |           |           |           |   |           |           |           |   |           |           |           |   |           |           |           |    |           |           |           |    |           |           |           |    |           |           |           |   |           |          |           |   |           |          |           |   |           |          |           |   |           |          |           |   |           |          |           |   |           |          |           |   |           |          |           |   |           |          |           |   |           |          |          |   |           |          |          |   |           |          |           |   |           |          |          |   |           |          |          |   |           |           |           |   |           |          |           |    |           |          |           |
| H                                                                                   | -1.946473                                                                                                                                                                                                                                                                                                                                                                                                                                                                                                                                                                                                                                                                                                                                                                                                                                                                                                                                                                                                                                                                                                                                                                                                                                                                                                                                                                                                                                                                                                                                                                                                                                                                                                                                                                                                                                                                                                                                                                                                                                                                                                                                                                                                                                                                                                                                                                                                                                                                                                                      | -1.357894 | -3.700007 |          |          |   |                                     |          |          |   |           |           |           |   |           |           |           |   |           |           |           |   |           |           |           |   |           |           |           |   |           |           |           |   |           |           |           |   |           |           |           |   |           |           |           |   |           |           |           |   |           |           |           |   |           |           |           |    |           |           |           |    |           |           |           |    |           |           |           |   |           |          |           |   |           |          |           |   |           |          |           |   |           |          |           |   |           |          |           |   |           |          |           |   |           |          |           |   |           |          |           |   |           |          |          |   |           |          |          |   |           |          |           |   |           |          |          |   |           |          |          |   |           |           |           |   |           |          |           |    |           |          |           |
| H                                                                                   | -3.593464                                                                                                                                                                                                                                                                                                                                                                                                                                                                                                                                                                                                                                                                                                                                                                                                                                                                                                                                                                                                                                                                                                                                                                                                                                                                                                                                                                                                                                                                                                                                                                                                                                                                                                                                                                                                                                                                                                                                                                                                                                                                                                                                                                                                                                                                                                                                                                                                                                                                                                                      | -1.964469 | -3.309122 |          |          |   |                                     |          |          |   |           |           |           |   |           |           |           |   |           |           |           |   |           |           |           |   |           |           |           |   |           |           |           |   |           |           |           |   |           |           |           |   |           |           |           |   |           |           |           |   |           |           |           |   |           |           |           |    |           |           |           |    |           |           |           |    |           |           |           |   |           |          |           |   |           |          |           |   |           |          |           |   |           |          |           |   |           |          |           |   |           |          |           |   |           |          |           |   |           |          |           |   |           |          |          |   |           |          |          |   |           |          |           |   |           |          |          |   |           |          |          |   |           |           |           |   |           |          |           |    |           |          |           |
| C                                                                                   | -3.949760                                                                                                                                                                                                                                                                                                                                                                                                                                                                                                                                                                                                                                                                                                                                                                                                                                                                                                                                                                                                                                                                                                                                                                                                                                                                                                                                                                                                                                                                                                                                                                                                                                                                                                                                                                                                                                                                                                                                                                                                                                                                                                                                                                                                                                                                                                                                                                                                                                                                                                                      | 1.005745  | -3.729657 |          |          |   |                                     |          |          |   |           |           |           |   |           |           |           |   |           |           |           |   |           |           |           |   |           |           |           |   |           |           |           |   |           |           |           |   |           |           |           |   |           |           |           |   |           |           |           |   |           |           |           |   |           |           |           |    |           |           |           |    |           |           |           |    |           |           |           |   |           |          |           |   |           |          |           |   |           |          |           |   |           |          |           |   |           |          |           |   |           |          |           |   |           |          |           |   |           |          |           |   |           |          |          |   |           |          |          |   |           |          |           |   |           |          |          |   |           |          |          |   |           |           |           |   |           |          |           |    |           |          |           |
| C                                                                                   | -3.597806                                                                                                                                                                                                                                                                                                                                                                                                                                                                                                                                                                                                                                                                                                                                                                                                                                                                                                                                                                                                                                                                                                                                                                                                                                                                                                                                                                                                                                                                                                                                                                                                                                                                                                                                                                                                                                                                                                                                                                                                                                                                                                                                                                                                                                                                                                                                                                                                                                                                                                                      | 0.928302  | -2.274244 |          |          |   |                                     |          |          |   |           |           |           |   |           |           |           |   |           |           |           |   |           |           |           |   |           |           |           |   |           |           |           |   |           |           |           |   |           |           |           |   |           |           |           |   |           |           |           |   |           |           |           |   |           |           |           |    |           |           |           |    |           |           |           |    |           |           |           |   |           |          |           |   |           |          |           |   |           |          |           |   |           |          |           |   |           |          |           |   |           |          |           |   |           |          |           |   |           |          |           |   |           |          |          |   |           |          |          |   |           |          |           |   |           |          |          |   |           |          |          |   |           |           |           |   |           |          |           |    |           |          |           |
| C                                                                                   | -3.931782                                                                                                                                                                                                                                                                                                                                                                                                                                                                                                                                                                                                                                                                                                                                                                                                                                                                                                                                                                                                                                                                                                                                                                                                                                                                                                                                                                                                                                                                                                                                                                                                                                                                                                                                                                                                                                                                                                                                                                                                                                                                                                                                                                                                                                                                                                                                                                                                                                                                                                                      | 1.996419  | -1.319341 |          |          |   |                                     |          |          |   |           |           |           |   |           |           |           |   |           |           |           |   |           |           |           |   |           |           |           |   |           |           |           |   |           |           |           |   |           |           |           |   |           |           |           |   |           |           |           |   |           |           |           |   |           |           |           |    |           |           |           |    |           |           |           |    |           |           |           |   |           |          |           |   |           |          |           |   |           |          |           |   |           |          |           |   |           |          |           |   |           |          |           |   |           |          |           |   |           |          |           |   |           |          |          |   |           |          |          |   |           |          |           |   |           |          |          |   |           |          |          |   |           |           |           |   |           |          |           |    |           |          |           |
| C                                                                                   | -4.976212                                                                                                                                                                                                                                                                                                                                                                                                                                                                                                                                                                                                                                                                                                                                                                                                                                                                                                                                                                                                                                                                                                                                                                                                                                                                                                                                                                                                                                                                                                                                                                                                                                                                                                                                                                                                                                                                                                                                                                                                                                                                                                                                                                                                                                                                                                                                                                                                                                                                                                                      | 2.917943  | -1.610359 |          |          |   |                                     |          |          |   |           |           |           |   |           |           |           |   |           |           |           |   |           |           |           |   |           |           |           |   |           |           |           |   |           |           |           |   |           |           |           |   |           |           |           |   |           |           |           |   |           |           |           |   |           |           |           |    |           |           |           |    |           |           |           |    |           |           |           |   |           |          |           |   |           |          |           |   |           |          |           |   |           |          |           |   |           |          |           |   |           |          |           |   |           |          |           |   |           |          |           |   |           |          |          |   |           |          |          |   |           |          |           |   |           |          |          |   |           |          |          |   |           |           |           |   |           |          |           |    |           |          |           |
| C                                                                                   | -3.246653                                                                                                                                                                                                                                                                                                                                                                                                                                                                                                                                                                                                                                                                                                                                                                                                                                                                                                                                                                                                                                                                                                                                                                                                                                                                                                                                                                                                                                                                                                                                                                                                                                                                                                                                                                                                                                                                                                                                                                                                                                                                                                                                                                                                                                                                                                                                                                                                                                                                                                                      | 2.144602  | -0.082325 |          |          |   |                                     |          |          |   |           |           |           |   |           |           |           |   |           |           |           |   |           |           |           |   |           |           |           |   |           |           |           |   |           |           |           |   |           |           |           |   |           |           |           |   |           |           |           |   |           |           |           |   |           |           |           |    |           |           |           |    |           |           |           |    |           |           |           |   |           |          |           |   |           |          |           |   |           |          |           |   |           |          |           |   |           |          |           |   |           |          |           |   |           |          |           |   |           |          |           |   |           |          |          |   |           |          |          |   |           |          |           |   |           |          |          |   |           |          |          |   |           |           |           |   |           |          |           |    |           |          |           |
| C                                                                                   | -5.327213                                                                                                                                                                                                                                                                                                                                                                                                                                                                                                                                                                                                                                                                                                                                                                                                                                                                                                                                                                                                                                                                                                                                                                                                                                                                                                                                                                                                                                                                                                                                                                                                                                                                                                                                                                                                                                                                                                                                                                                                                                                                                                                                                                                                                                                                                                                                                                                                                                                                                                                      | 3.917311  | -0.693075 |          |          |   |                                     |          |          |   |           |           |           |   |           |           |           |   |           |           |           |   |           |           |           |   |           |           |           |   |           |           |           |   |           |           |           |   |           |           |           |   |           |           |           |   |           |           |           |   |           |           |           |   |           |           |           |    |           |           |           |    |           |           |           |    |           |           |           |   |           |          |           |   |           |          |           |   |           |          |           |   |           |          |           |   |           |          |           |   |           |          |           |   |           |          |           |   |           |          |           |   |           |          |          |   |           |          |          |   |           |          |           |   |           |          |          |   |           |          |          |   |           |           |           |   |           |          |           |    |           |          |           |
| H                                                                                   | -5.498308                                                                                                                                                                                                                                                                                                                                                                                                                                                                                                                                                                                                                                                                                                                                                                                                                                                                                                                                                                                                                                                                                                                                                                                                                                                                                                                                                                                                                                                                                                                                                                                                                                                                                                                                                                                                                                                                                                                                                                                                                                                                                                                                                                                                                                                                                                                                                                                                                                                                                                                      | 2.845549  | -2.573699 |          |          |   |                                     |          |          |   |           |           |           |   |           |           |           |   |           |           |           |   |           |           |           |   |           |           |           |   |           |           |           |   |           |           |           |   |           |           |           |   |           |           |           |   |           |           |           |   |           |           |           |   |           |           |           |    |           |           |           |    |           |           |           |    |           |           |           |   |           |          |           |   |           |          |           |   |           |          |           |   |           |          |           |   |           |          |           |   |           |          |           |   |           |          |           |   |           |          |           |   |           |          |          |   |           |          |          |   |           |          |           |   |           |          |          |   |           |          |          |   |           |           |           |   |           |          |           |    |           |          |           |
| C                                                                                   | -3.596605                                                                                                                                                                                                                                                                                                                                                                                                                                                                                                                                                                                                                                                                                                                                                                                                                                                                                                                                                                                                                                                                                                                                                                                                                                                                                                                                                                                                                                                                                                                                                                                                                                                                                                                                                                                                                                                                                                                                                                                                                                                                                                                                                                                                                                                                                                                                                                                                                                                                                                                      | 3.151939  | 0.827700  |          |          |   |                                     |          |          |   |           |           |           |   |           |           |           |   |           |           |           |   |           |           |           |   |           |           |           |   |           |           |           |   |           |           |           |   |           |           |           |   |           |           |           |   |           |           |           |   |           |           |           |   |           |           |           |    |           |           |           |    |           |           |           |    |           |           |           |   |           |          |           |   |           |          |           |   |           |          |           |   |           |          |           |   |           |          |           |   |           |          |           |   |           |          |           |   |           |          |           |   |           |          |          |   |           |          |          |   |           |          |           |   |           |          |          |   |           |          |          |   |           |           |           |   |           |          |           |    |           |          |           |
| H                                                                                   | -2.395789                                                                                                                                                                                                                                                                                                                                                                                                                                                                                                                                                                                                                                                                                                                                                                                                                                                                                                                                                                                                                                                                                                                                                                                                                                                                                                                                                                                                                                                                                                                                                                                                                                                                                                                                                                                                                                                                                                                                                                                                                                                                                                                                                                                                                                                                                                                                                                                                                                                                                                                      | 1.491654  | 0.162795  |          |          |   |                                     |          |          |   |           |           |           |   |           |           |           |   |           |           |           |   |           |           |           |   |           |           |           |   |           |           |           |   |           |           |           |   |           |           |           |   |           |           |           |   |           |           |           |   |           |           |           |   |           |           |           |    |           |           |           |    |           |           |           |    |           |           |           |   |           |          |           |   |           |          |           |   |           |          |           |   |           |          |           |   |           |          |           |   |           |          |           |   |           |          |           |   |           |          |           |   |           |          |          |   |           |          |          |   |           |          |           |   |           |          |          |   |           |          |          |   |           |           |           |   |           |          |           |    |           |          |           |
| C                                                                                   | -4.646273                                                                                                                                                                                                                                                                                                                                                                                                                                                                                                                                                                                                                                                                                                                                                                                                                                                                                                                                                                                                                                                                                                                                                                                                                                                                                                                                                                                                                                                                                                                                                                                                                                                                                                                                                                                                                                                                                                                                                                                                                                                                                                                                                                                                                                                                                                                                                                                                                                                                                                                      | 4.038180  | 0.532877  |          |          |   |                                     |          |          |   |           |           |           |   |           |           |           |   |           |           |           |   |           |           |           |   |           |           |           |   |           |           |           |   |           |           |           |   |           |           |           |   |           |           |           |   |           |           |           |   |           |           |           |   |           |           |           |    |           |           |           |    |           |           |           |    |           |           |           |   |           |          |           |   |           |          |           |   |           |          |           |   |           |          |           |   |           |          |           |   |           |          |           |   |           |          |           |   |           |          |           |   |           |          |          |   |           |          |          |   |           |          |           |   |           |          |          |   |           |          |          |   |           |           |           |   |           |          |           |    |           |          |           |
| H                                                                                   | -6.142216                                                                                                                                                                                                                                                                                                                                                                                                                                                                                                                                                                                                                                                                                                                                                                                                                                                                                                                                                                                                                                                                                                                                                                                                                                                                                                                                                                                                                                                                                                                                                                                                                                                                                                                                                                                                                                                                                                                                                                                                                                                                                                                                                                                                                                                                                                                                                                                                                                                                                                                      | 4.615559  | -0.941839 |          |          |   |                                     |          |          |   |           |           |           |   |           |           |           |   |           |           |           |   |           |           |           |   |           |           |           |   |           |           |           |   |           |           |           |   |           |           |           |   |           |           |           |   |           |           |           |   |           |           |           |   |           |           |           |    |           |           |           |    |           |           |           |    |           |           |           |   |           |          |           |   |           |          |           |   |           |          |           |   |           |          |           |   |           |          |           |   |           |          |           |   |           |          |           |   |           |          |           |   |           |          |          |   |           |          |          |   |           |          |           |   |           |          |          |   |           |          |          |   |           |           |           |   |           |          |           |    |           |          |           |
| H                                                                                   | -3.029084                                                                                                                                                                                                                                                                                                                                                                                                                                                                                                                                                                                                                                                                                                                                                                                                                                                                                                                                                                                                                                                                                                                                                                                                                                                                                                                                                                                                                                                                                                                                                                                                                                                                                                                                                                                                                                                                                                                                                                                                                                                                                                                                                                                                                                                                                                                                                                                                                                                                                                                      | 3.246825  | 1.765253  |          |          |   |                                     |          |          |   |           |           |           |   |           |           |           |   |           |           |           |   |           |           |           |   |           |           |           |   |           |           |           |   |           |           |           |   |           |           |           |   |           |           |           |   |           |           |           |   |           |           |           |   |           |           |           |    |           |           |           |    |           |           |           |    |           |           |           |   |           |          |           |   |           |          |           |   |           |          |           |   |           |          |           |   |           |          |           |   |           |          |           |   |           |          |           |   |           |          |           |   |           |          |          |   |           |          |          |   |           |          |           |   |           |          |          |   |           |          |          |   |           |           |           |   |           |          |           |    |           |          |           |
| H                                                                                   | -4.925807                                                                                                                                                                                                                                                                                                                                                                                                                                                                                                                                                                                                                                                                                                                                                                                                                                                                                                                                                                                                                                                                                                                                                                                                                                                                                                                                                                                                                                                                                                                                                                                                                                                                                                                                                                                                                                                                                                                                                                                                                                                                                                                                                                                                                                                                                                                                                                                                                                                                                                                      | 4.826474  | 1.249748  |          |          |   |                                     |          |          |   |           |           |           |   |           |           |           |   |           |           |           |   |           |           |           |   |           |           |           |   |           |           |           |   |           |           |           |   |           |           |           |   |           |           |           |   |           |           |           |   |           |           |           |   |           |           |           |    |           |           |           |    |           |           |           |    |           |           |           |   |           |          |           |   |           |          |           |   |           |          |           |   |           |          |           |   |           |          |           |   |           |          |           |   |           |          |           |   |           |          |           |   |           |          |          |   |           |          |          |   |           |          |           |   |           |          |          |   |           |          |          |   |           |           |           |   |           |          |           |    |           |          |           |
| O                                                                                   | -3.512597                                                                                                                                                                                                                                                                                                                                                                                                                                                                                                                                                                                                                                                                                                                                                                                                                                                                                                                                                                                                                                                                                                                                                                                                                                                                                                                                                                                                                                                                                                                                                                                                                                                                                                                                                                                                                                                                                                                                                                                                                                                                                                                                                                                                                                                                                                                                                                                                                                                                                                                      | -0.155244 | -4.351478 |          |          |   |                                     |          |          |   |           |           |           |   |           |           |           |   |           |           |           |   |           |           |           |   |           |           |           |   |           |           |           |   |           |           |           |   |           |           |           |   |           |           |           |   |           |           |           |   |           |           |           |   |           |           |           |    |           |           |           |    |           |           |           |    |           |           |           |   |           |          |           |   |           |          |           |   |           |          |           |   |           |          |           |   |           |          |           |   |           |          |           |   |           |          |           |   |           |          |           |   |           |          |          |   |           |          |          |   |           |          |           |   |           |          |          |   |           |          |          |   |           |           |           |   |           |          |           |    |           |          |           |
| O                                                                                   | -4.505375                                                                                                                                                                                                                                                                                                                                                                                                                                                                                                                                                                                                                                                                                                                                                                                                                                                                                                                                                                                                                                                                                                                                                                                                                                                                                                                                                                                                                                                                                                                                                                                                                                                                                                                                                                                                                                                                                                                                                                                                                                                                                                                                                                                                                                                                                                                                                                                                                                                                                                                      | 1.881532  | -4.358097 |          |          |   |                                     |          |          |   |           |           |           |   |           |           |           |   |           |           |           |   |           |           |           |   |           |           |           |   |           |           |           |   |           |           |           |   |           |           |           |   |           |           |           |   |           |           |           |   |           |           |           |   |           |           |           |    |           |           |           |    |           |           |           |    |           |           |           |   |           |          |           |   |           |          |           |   |           |          |           |   |           |          |           |   |           |          |           |   |           |          |           |   |           |          |           |   |           |          |           |   |           |          |          |   |           |          |          |   |           |          |           |   |           |          |          |   |           |          |          |   |           |           |           |   |           |          |           |    |           |          |           |
| Ag                                                                                  | -0.490482                                                                                                                                                                                                                                                                                                                                                                                                                                                                                                                                                                                                                                                                                                                                                                                                                                                                                                                                                                                                                                                                                                                                                                                                                                                                                                                                                                                                                                                                                                                                                                                                                                                                                                                                                                                                                                                                                                                                                                                                                                                                                                                                                                                                                                                                                                                                                                                                                                                                                                                      | 0.013541  | -0.780142 |          |          |   |                                     |          |          |   |           |           |           |   |           |           |           |   |           |           |           |   |           |           |           |   |           |           |           |   |           |           |           |   |           |           |           |   |           |           |           |   |           |           |           |   |           |           |           |   |           |           |           |   |           |           |           |    |           |           |           |    |           |           |           |    |           |           |           |   |           |          |           |   |           |          |           |   |           |          |           |   |           |          |           |   |           |          |           |   |           |          |           |   |           |          |           |   |           |          |           |   |           |          |          |   |           |          |          |   |           |          |           |   |           |          |          |   |           |          |          |   |           |           |           |   |           |          |           |    |           |          |           |



|  |    |           |           |           |
|--|----|-----------|-----------|-----------|
|  | N  | 1.753951  | -0.864572 | -1.049647 |
|  | N  | 2.565504  | -0.752618 | 0.020467  |
|  | N  | 0.725780  | -1.711313 | 1.707046  |
|  | N  | 0.894588  | -0.381013 | 1.842774  |
|  | N  | 0.822787  | 1.777440  | -0.295001 |
|  | N  | 1.868013  | 1.625486  | 0.547050  |
|  | B  | 2.187356  | 0.231117  | 1.172623  |
|  | C  | 2.262962  | -1.819833 | -1.840136 |
|  | C  | 3.434974  | -2.369102 | -1.257221 |
|  | C  | 3.590385  | -1.657694 | -0.055033 |
|  | C  | -0.415101 | -2.031526 | 2.328925  |
|  | C  | -1.015462 | -0.876171 | 2.894749  |
|  | C  | -0.127377 | 0.169342  | 2.585467  |
|  | C  | 0.833077  | 3.041108  | -0.742174 |
|  | C  | 1.917476  | 3.750086  | -0.161948 |
|  | C  | 2.563298  | 2.803886  | 0.651857  |
|  | H  | 3.093371  | 0.333405  | 1.960642  |
|  | C  | 1.612006  | -2.181442 | -3.148735 |
|  | F  | 2.466783  | -2.067426 | -4.184460 |
|  | F  | 1.153763  | -3.463250 | -3.137175 |
|  | F  | 0.539579  | -1.377540 | -3.404994 |
|  | C  | 4.623347  | -1.790702 | 1.040061  |
|  | F  | 5.357965  | -0.659787 | 1.170310  |
|  | F  | 4.036402  | -2.035767 | 2.238365  |
|  | F  | 5.472916  | -2.806086 | 0.784297  |
|  | C  | -0.221584 | 3.555576  | -1.694627 |
|  | F  | 0.332163  | 4.301787  | -2.673507 |
|  | F  | -0.889097 | 2.529231  | -2.290369 |
|  | F  | -1.133897 | 4.320676  | -1.054094 |
|  | C  | 3.846376  | 2.918126  | 1.446232  |
|  | F  | 4.794479  | 2.093287  | 0.933247  |
|  | F  | 4.330488  | 4.175298  | 1.404091  |
|  | F  | 3.678689  | 2.588552  | 2.747982  |
|  | C  | -0.811491 | -3.477321 | 2.462387  |
|  | F  | -0.527980 | -3.952944 | 3.700496  |
|  | F  | -2.156809 | -3.642196 | 2.282874  |
|  | F  | -0.180380 | -4.256132 | 1.564234  |
|  | C  | -0.204730 | 1.624459  | 2.963335  |
|  | F  | -0.727060 | 2.397685  | 1.962266  |
|  | F  | -0.987975 | 1.810296  | 4.045330  |
|  | F  | 1.020969  | 2.124455  | 3.246257  |
|  | Br | -2.670199 | -0.775464 | 3.796868  |
|  | Br | 4.494123  | -3.736127 | -1.994655 |
|  | Br | 2.324870  | 5.563496  | -0.441425 |
|  | C  | -4.470570 | -0.733240 | 0.415681  |
|  | H  | -3.220725 | -0.480560 | 0.128521  |
|  | H  | -4.889544 | -0.381086 | -0.548508 |
|  | H  | -4.751845 | -0.105802 | 1.279664  |
|  | C  | -5.133346 | -2.617353 | 1.881921  |
|  | H  | -5.382427 | -1.769049 | 2.546348  |
|  | H  | -6.078539 | -3.149688 | 1.639273  |
|  | H  | -4.446889 | -3.305066 | 2.410934  |
|  | N  | -4.510111 | -2.097281 | 0.662853  |

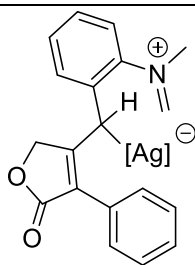

84

G SCF Done: -11529.1966545 A.U.

|    |           |           |           |
|----|-----------|-----------|-----------|
| C  | -3.694051 | -2.949224 | -0.577513 |
| C  | -3.978095 | -4.319366 | -0.513581 |
| C  | -2.918785 | -5.230601 | -0.679679 |
| C  | -1.610719 | -4.758634 | -0.884626 |
| C  | -1.348597 | -3.378357 | -0.926541 |
| C  | -2.387424 | -2.446752 | -0.776867 |
| H  | -5.008254 | -4.666718 | -0.339131 |
| H  | -3.118952 | -6.312330 | -0.639876 |
| H  | -0.778203 | -5.468805 | -1.001142 |
| H  | -0.322523 | -3.007017 | -1.045915 |
| C  | -2.249877 | -0.942377 | -0.749076 |
| C  | -2.884633 | -0.253521 | -1.842074 |
| C  | -2.767146 | -0.711644 | -3.285846 |
| H  | -1.755056 | -0.504610 | -3.695618 |
| H  | -2.948624 | -1.805218 | -3.399279 |
| C  | -4.385399 | 0.935437  | -3.198386 |
| C  | -3.862035 | 0.761023  | -1.815060 |
| C  | -4.290385 | 1.586639  | -0.675904 |
| C  | -5.613655 | 2.101274  | -0.616149 |
| C  | -3.411654 | 1.870737  | 0.399657  |
| C  | -6.047094 | 2.830106  | 0.501061  |
| H  | -6.287813 | 1.942220  | -1.471023 |
| C  | -3.846340 | 2.612665  | 1.508729  |
| H  | -2.361256 | 1.549343  | 0.353598  |
| C  | -5.169703 | 3.081202  | 1.573498  |
| H  | -7.078511 | 3.216472  | 0.530026  |
| H  | -3.139529 | 2.825861  | 2.324141  |
| H  | -5.512198 | 3.655972  | 2.448471  |
| O  | -3.742609 | 0.023891  | -4.028988 |
| O  | -5.269603 | 1.655254  | -3.615695 |
| Ag | -0.335184 | 0.000596  | -0.949905 |
| N  | 1.911110  | -1.010627 | -0.942647 |
| N  | 2.647956  | -0.779826 | 0.161364  |
| N  | 0.613294  | -1.406579 | 1.782342  |
| N  | 0.881098  | -0.084185 | 1.789830  |
| N  | 0.987043  | 1.746141  | -0.592344 |
| N  | 2.011147  | 1.673642  | 0.278788  |
| B  | 2.240323  | 0.375592  | 1.124071  |
| C  | 2.396206  | -2.116597 | -1.522633 |
| C  | 3.478292  | -2.637594 | -0.764767 |
| C  | 3.602783  | -1.749617 | 0.317333  |
| C  | -0.555439 | -1.574689 | 2.412888  |
| C  | -1.073047 | -0.327931 | 2.851482  |
| C  | -0.108265 | 0.612665  | 2.450557  |
| C  | 1.030426  | 2.941115  | -1.198151 |
| C  | 2.132865  | 3.687647  | -0.705596 |
| C  | 2.742058  | 2.833267  | 0.234670  |
| H  | 3.096876  | 0.573008  | 1.948957  |
| C  | 1.819377  | -2.640511 | -2.811712 |
| F  | 2.732832  | -2.641521 | -3.806091 |
| F  | 1.373758  | -3.917216 | -2.667763 |
| F  | 0.760378  | -1.888764 | -3.223491 |
| C  | 4.537874  | -1.765674 | 1.503483  |
| F  | 5.330795  | -0.666990 | 1.526398  |
| F  | 3.845720  | -1.791928 | 2.670919  |
| F  | 5.338284  | -2.850521 | 1.477365  |
| C  | -0.055654 | 3.259264  | -2.198553 |
| F  | 0.181589  | 4.395909  | -2.871524 |

|                                                                                     |                                                                                                                                                                                                                                                                                                                                                                                                                                                                                                                                                                                                                                                                                                                                                                                                                                                                                                                                                                                                                                                                                                                                                                                                                                                                                         |
|-------------------------------------------------------------------------------------|-----------------------------------------------------------------------------------------------------------------------------------------------------------------------------------------------------------------------------------------------------------------------------------------------------------------------------------------------------------------------------------------------------------------------------------------------------------------------------------------------------------------------------------------------------------------------------------------------------------------------------------------------------------------------------------------------------------------------------------------------------------------------------------------------------------------------------------------------------------------------------------------------------------------------------------------------------------------------------------------------------------------------------------------------------------------------------------------------------------------------------------------------------------------------------------------------------------------------------------------------------------------------------------------|
|                                                                                     | <p>F -0.172837 2.247082 -3.111371</p> <p>F -1.264379 3.368766 -1.588516</p> <p>C 4.021560 2.999816 1.026172</p> <p>F 4.913241 2.034024 0.684904</p> <p>F 4.595781 4.193395 0.778185</p> <p>F 3.817994 2.913332 2.361021</p> <p>C -1.114120 -2.952377 2.647825</p> <p>F -1.124019 -3.260459 3.967685</p> <p>F -2.413555 -3.041959 2.221136</p> <p>F -0.408057 -3.898822 2.002132</p> <p>C -0.086052 2.103022 2.658069</p> <p>F -0.523834 2.788923 1.560862</p> <p>F -0.885030 2.465932 3.686819</p> <p>F 1.164436 2.545865 2.926985</p> <p>Br -2.713536 -0.044687 3.737187</p> <p>Br 4.481592 -4.171138 -1.185869</p> <p>Br 2.628137 5.432570 -1.200803</p> <p>C -5.283662 -1.315833 -1.384388</p> <p>H -2.575647 -0.548716 0.235241</p> <p>H -5.119832 -1.703589 -2.399445</p> <p>H -6.067715 -0.568370 -1.198514</p> <p>C -5.069128 -1.604990 1.032375</p> <p>H -5.601236 -0.635635 1.061344</p> <p>H -5.693425 -2.407244 1.478376</p> <p>H -4.134812 -1.526068 1.617584</p> <p>N -4.748945 -1.956667 -0.362797</p>                                                                                                                                                                                                                                                                    |
| 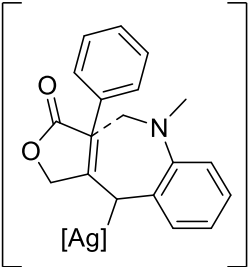 | <p>84</p> <p>TS-GH SCF Done: -11529.1927656 A.U.</p> <p>C -3.881573 -2.985210 -0.693101</p> <p>C -4.379910 -4.294404 -0.767291</p> <p>C -3.473669 -5.361293 -0.923303</p> <p>C -2.090863 -5.114470 -0.996655</p> <p>C -1.594362 -3.800490 -0.907846</p> <p>C -2.488127 -2.734352 -0.752171</p> <p>H -5.465298 -4.471463 -0.709081</p> <p>H -3.852929 -6.392943 -0.989402</p> <p>H -1.387918 -5.953248 -1.117088</p> <p>H -0.514855 -3.602096 -0.938358</p> <p>C -2.202090 -1.269504 -0.610971</p> <p>C -2.579746 -0.447222 -1.699256</p> <p>C -2.431684 -0.866144 -3.159756</p> <p>H -1.382756 -0.831150 -3.517129</p> <p>H -2.799655 -1.906667 -3.321753</p> <p>C -3.903570 0.923638 -3.109822</p> <p>C -3.679159 0.509803 -1.675989</p> <p>C -4.016000 1.472102 -0.588270</p> <p>C -5.256382 2.158770 -0.634687</p> <p>C -3.148307 1.732034 0.494569</p> <p>C -5.621163 3.053082 0.381666</p> <p>H -5.921409 2.014237 -1.498574</p> <p>C -3.512576 2.634059 1.507937</p> <p>H -2.154812 1.260800 0.536220</p> <p>C -4.753308 3.289171 1.463190</p> <p>H -6.587625 3.578291 0.321741</p> <p>H -2.817663 2.828528 2.336185</p> <p>H -5.037351 3.991873 2.262287</p> <p>O -3.212670 0.052039 -3.929665</p> <p>O -4.624998 1.784396 -3.560421</p> <p>Ag -0.335170 -0.232518 -0.897715</p> |

|  |    |           |           |           |
|--|----|-----------|-----------|-----------|
|  | N  | 1.856553  | -1.112645 | -0.832436 |
|  | N  | 2.636166  | -0.748182 | 0.205075  |
|  | N  | 0.601788  | -1.302681 | 1.844956  |
|  | N  | 0.905634  | 0.013377  | 1.841295  |
|  | N  | 0.833621  | 1.658379  | -0.657859 |
|  | N  | 1.901372  | 1.686648  | 0.165015  |
|  | B  | 2.220152  | 0.462814  | 1.093481  |
|  | C  | 2.383642  | -2.226494 | -1.360524 |
|  | C  | 3.538448  | -2.615287 | -0.633255 |
|  | C  | 3.659893  | -1.640637 | 0.372463  |
|  | C  | -0.545592 | -1.436776 | 2.520830  |
|  | C  | -1.011547 | -0.177067 | 2.981090  |
|  | C  | -0.038640 | 0.736592  | 2.537832  |
|  | C  | 0.786496  | 2.818902  | -1.328179 |
|  | C  | 1.865934  | 3.648213  | -0.925457 |
|  | C  | 2.565946  | 2.877552  | 0.023481  |
|  | H  | 3.103529  | 0.755786  | 1.858406  |
|  | C  | 1.784723  | -2.886969 | -2.574974 |
|  | F  | 2.651710  | -2.906419 | -3.608765 |
|  | F  | 1.430190  | -4.170349 | -2.313141 |
|  | F  | 0.660823  | -2.235472 | -2.993641 |
|  | C  | 4.654456  | -1.512241 | 1.504061  |
|  | F  | 5.377899  | -0.372044 | 1.404870  |
|  | F  | 4.021498  | -1.491943 | 2.704532  |
|  | F  | 5.516050  | -2.548511 | 1.511581  |
|  | C  | -0.361626 | 3.061048  | -2.281693 |
|  | F  | -0.098105 | 4.047498  | -3.153083 |
|  | F  | -0.627319 | 1.927997  | -3.005801 |
|  | F  | -1.498364 | 3.371047  | -1.615369 |
|  | C  | 3.890233  | 3.141637  | 0.710241  |
|  | F  | 4.791845  | 2.188805  | 0.356827  |
|  | F  | 4.394585  | 4.337128  | 0.347904  |
|  | F  | 3.792214  | 3.130498  | 2.058046  |
|  | C  | -1.171548 | -2.792340 | 2.717369  |
|  | F  | -1.196552 | -3.143844 | 4.024744  |
|  | F  | -2.469794 | -2.796483 | 2.285071  |
|  | F  | -0.512050 | -3.749711 | 2.036605  |
|  | C  | 0.049480  | 2.226132  | 2.731208  |
|  | F  | -0.335602 | 2.917022  | 1.617504  |
|  | F  | -0.745538 | 2.637703  | 3.743247  |
|  | F  | 1.316393  | 2.610999  | 3.010918  |
|  | Br | -2.609248 | 0.132383  | 3.927823  |
|  | Br | 4.622719  | -4.104485 | -1.003661 |
|  | Br | 2.229014  | 5.393294  | -1.521878 |
|  | C  | -5.011217 | -0.953314 | -1.522983 |
|  | H  | -2.525200 | -0.884605 | 0.374861  |
|  | H  | -4.962753 | -1.401586 | -2.531107 |
|  | H  | -5.892464 | -0.308867 | -1.364414 |
|  | C  | -5.192947 | -1.552926 | 0.871652  |
|  | H  | -5.812045 | -0.635466 | 0.877465  |
|  | H  | -5.784949 | -2.401395 | 1.275724  |
|  | H  | -4.325787 | -1.388611 | 1.544189  |
|  | N  | -4.769736 | -1.844786 | -0.504779 |

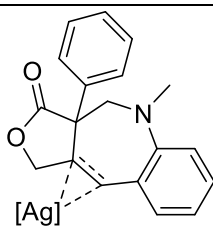

84

H-Ag SCF Done: -11529.1963386 A.U.

|    |           |           |           |
|----|-----------|-----------|-----------|
| C  | -4.594083 | -2.262447 | -0.675549 |
| C  | -5.435402 | -3.390456 | -0.615180 |
| C  | -4.914761 | -4.662976 | -0.914543 |
| C  | -3.563087 | -4.820128 | -1.270546 |
| C  | -2.702593 | -3.705588 | -1.291242 |
| C  | -3.208062 | -2.439760 | -0.975652 |
| H  | -6.496981 | -3.270815 | -0.348975 |
| H  | -5.578801 | -5.541136 | -0.880002 |
| H  | -3.168327 | -5.819141 | -1.511889 |
| H  | -1.634659 | -3.825780 | -1.515436 |
| C  | -2.528530 | -1.128570 | -0.783952 |
| C  | -2.634414 | -0.112566 | -1.749387 |
| C  | -2.686202 | -0.354734 | -3.252658 |
| H  | -1.693973 | -0.528755 | -3.711229 |
| H  | -3.332891 | -1.232081 | -3.496198 |
| C  | -3.745925 | 1.680212  | -2.873717 |
| C  | -3.626902 | 0.997493  | -1.496638 |
| C  | -3.525934 | 1.965421  | -0.334012 |
| C  | -4.571548 | 2.898143  | -0.137472 |
| C  | -2.420422 | 2.014489  | 0.538514  |
| C  | -4.515993 | 3.837003  | 0.903894  |
| H  | -5.422177 | 2.917101  | -0.834338 |
| C  | -2.356243 | 2.962349  | 1.573364  |
| H  | -1.572611 | 1.326532  | 0.398466  |
| C  | -3.407113 | 3.871874  | 1.767212  |
| H  | -5.341078 | 4.555369  | 1.031903  |
| H  | -1.475852 | 2.991972  | 2.230276  |
| H  | -3.357351 | 4.609057  | 2.583667  |
| O  | -3.243610 | 0.836102  | -3.831631 |
| O  | -4.268497 | 2.732705  | -3.148354 |
| Ag | -0.496976 | -0.383320 | -1.010922 |
| N  | 1.512474  | -1.541628 | -0.770619 |
| N  | 2.302225  | -1.190680 | 0.265145  |
| N  | -0.011621 | -0.791676 | 1.673603  |
| N  | 0.876704  | 0.217582  | 1.795750  |
| N  | 0.950101  | 1.361394  | -0.983411 |
| N  | 2.061408  | 1.281819  | -0.227714 |
| B  | 2.171439  | 0.219100  | 0.917239  |
| C  | 1.839131  | -2.795044 | -1.119968 |
| C  | 2.863259  | -3.289479 | -0.272260 |
| C  | 3.125364  | -2.227403 | 0.611020  |
| C  | -0.947209 | -0.603551 | 2.615418  |
| C  | -0.672979 | 0.567198  | 3.370860  |
| C  | 0.511370  | 1.072549  | 2.806779  |
| C  | 1.124264  | 2.351680  | -1.875778 |
| C  | 2.402689  | 2.940750  | -1.699119 |
| C  | 2.973152  | 2.218677  | -0.631518 |
| H  | 3.134159  | 0.466717  | 1.595788  |
| C  | 1.184525  | -3.484702 | -2.288781 |
| F  | 2.084773  | -3.795405 | -3.245055 |
| F  | 0.578830  | -4.637396 | -1.907175 |
| F  | 0.231488  | -2.696004 | -2.862212 |
| C  | 4.082511  | -2.126633 | 1.777067  |
| F  | 5.065537  | -1.226701 | 1.543187  |
| F  | 3.426894  | -1.734302 | 2.900916  |
| F  | 4.661224  | -3.315642 | 2.033029  |
| C  | 0.022933  | 2.603593  | -2.876048 |
| F  | 0.288370  | 3.629330  | -3.695163 |

|                                                                                     |                                                                                                                                                                                                                                                                                                                                                                                                                                                                                                                                                                                                                                                                                                                                                                                                                                                                                                                                                                                                                                                                                                                                                                                                                                                                    |
|-------------------------------------------------------------------------------------|--------------------------------------------------------------------------------------------------------------------------------------------------------------------------------------------------------------------------------------------------------------------------------------------------------------------------------------------------------------------------------------------------------------------------------------------------------------------------------------------------------------------------------------------------------------------------------------------------------------------------------------------------------------------------------------------------------------------------------------------------------------------------------------------------------------------------------------------------------------------------------------------------------------------------------------------------------------------------------------------------------------------------------------------------------------------------------------------------------------------------------------------------------------------------------------------------------------------------------------------------------------------|
|                                                                                     | <p>F -0.174582 1.489429 -3.646988</p> <p>F -1.153431 2.852875 -2.244314</p> <p>C 4.346486 2.315106 -0.001543</p> <p>F 4.991583 1.122801 -0.098360</p> <p>F 5.103512 3.240795 -0.620312</p> <p>F 4.285186 2.642024 1.309262</p> <p>C -2.098913 -1.562371 2.767383</p> <p>F -2.189749 -2.033506 4.030626</p> <p>F -3.288339 -0.944816 2.486655</p> <p>F -1.983127 -2.614454 1.929928</p> <p>C 1.315944 2.301653 3.140310</p> <p>F 1.543442 3.043150 2.018168</p> <p>F 0.660541 3.093153 4.015045</p> <p>F 2.520283 1.995311 3.672744</p> <p>Br -1.710396 1.243814 4.784066</p> <p>Br 3.662743 -4.985414 -0.381021</p> <p>Br 3.138542 4.373763 -2.667389</p> <p>C -5.009571 0.091193 -1.401076</p> <p>H -2.754031 -0.747276 0.228761</p> <p>H -5.174646 -0.349678 -2.407659</p> <p>H -5.832850 0.810721 -1.226687</p> <p>C -5.930806 -0.719493 0.753226</p> <p>H -7.011259 -0.860536 0.507777</p> <p>H -5.655276 -1.415523 1.568206</p> <p>H -5.790274 0.312143 1.136230</p> <p>N -5.043610 -0.932688 -0.387019</p>                                                                                                                                                                                                                                                   |
| 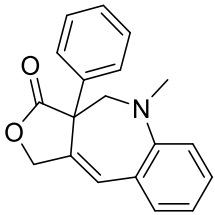 | <p>39</p> <p>H SCF Done: -938.827237545 A.U.</p> <p>C 2.051926 0.364636 0.550485</p> <p>C 3.172123 1.217145 0.768283</p> <p>C 4.417849 0.968838 0.185015</p> <p>C 4.603017 -0.155889 -0.640798</p> <p>C 3.510042 -0.988754 -0.888636</p> <p>C 2.213319 -0.756251 -0.349270</p> <p>H 3.069195 2.075563 1.446239</p> <p>H 5.257538 1.650113 0.396308</p> <p>H 5.582857 -0.370415 -1.093485</p> <p>H 3.634944 -1.854084 -1.560573</p> <p>C 1.157034 -1.644818 -0.845555</p> <p>C -0.186897 -1.643004 -0.647905</p> <p>C -1.154711 -2.653306 -1.212778</p> <p>H -1.666766 -2.291447 -2.134661</p> <p>H -0.701262 -3.643837 -1.422616</p> <p>C -2.071536 -1.818592 0.743101</p> <p>C -0.975698 -0.812750 0.322909</p> <p>C -1.614738 0.451988 -0.277185</p> <p>C -2.786238 1.011234 0.278147</p> <p>C -0.952591 1.139401 -1.315559</p> <p>C -3.282502 2.236325 -0.199280</p> <p>H -3.303626 0.485948 1.095549</p> <p>C -1.448816 2.366530 -1.788145</p> <p>H -0.034063 0.712152 -1.746252</p> <p>C -2.614900 2.919827 -1.231406</p> <p>H -4.198693 2.660402 0.241819</p> <p>H -0.918079 2.893085 -2.597385</p> <p>H -3.004590 3.881095 -1.602334</p> <p>O -2.163574 -2.818384 -0.181030</p> <p>O -2.770967 -1.773177 1.731233</p> <p>C -0.086929 -0.402729 1.536106</p> |

|                                                                                   |                                                                                                                                                                                                                                                                                                                                                                                                                                                                                                                                                                                                                                                                                                                                                                                                                                                                                                                                                                                                                                                                                                                                                                                                                                                                                                                                                                                                                                                                                                                                                                                                                                                                                                                                                                        |
|-----------------------------------------------------------------------------------|------------------------------------------------------------------------------------------------------------------------------------------------------------------------------------------------------------------------------------------------------------------------------------------------------------------------------------------------------------------------------------------------------------------------------------------------------------------------------------------------------------------------------------------------------------------------------------------------------------------------------------------------------------------------------------------------------------------------------------------------------------------------------------------------------------------------------------------------------------------------------------------------------------------------------------------------------------------------------------------------------------------------------------------------------------------------------------------------------------------------------------------------------------------------------------------------------------------------------------------------------------------------------------------------------------------------------------------------------------------------------------------------------------------------------------------------------------------------------------------------------------------------------------------------------------------------------------------------------------------------------------------------------------------------------------------------------------------------------------------------------------------------|
|                                                                                   | H 0.450370 -1.302693 1.904243<br>H 1.535110 -2.427550 -1.528952<br>H -0.749801 -0.053881 2.352157<br>C 0.570455 1.988669 1.687052<br>H -0.525902 2.115591 1.777162<br>H 1.031966 2.199678 2.681615<br>H 0.926651 2.748710 0.962387<br>N 0.852748 0.646152 1.197095                                                                                                                                                                                                                                                                                                                                                                                                                                                                                                                                                                                                                                                                                                                                                                                                                                                                                                                                                                                                                                                                                                                                                                                                                                                                                                                                                                                                                                                                                                     |
| 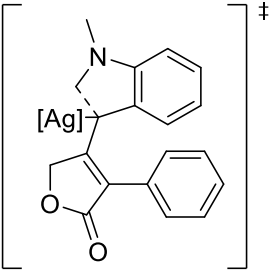 | 84<br>TS-GI SCF Done: -11529.1813808 A.U.<br>C -3.957144 -2.942176 -0.495271<br>C -4.194089 -4.320345 -0.595347<br>C -3.169310 -5.168662 -1.053004<br>C -1.913079 -4.635410 -1.373787<br>C -1.681656 -3.251824 -1.256361<br>C -2.693856 -2.367334 -0.850959<br>H -5.177140 -4.731407 -0.321018<br>H -3.355727 -6.249825 -1.142281<br>H -1.095132 -5.289234 -1.711193<br>H -0.686499 -2.848453 -1.482016<br>C -2.537005 -0.882559 -0.758407<br>C -2.625310 -0.045003 -1.938972<br>C -2.531290 -0.660294 -3.330748<br>H -1.555932 -1.145584 -3.544924<br>H -3.317555 -1.444798 -3.455574<br>C -3.116178 1.555860 -3.562853<br>C -3.079748 1.270484 -2.104429<br>C -3.556310 2.206257 -1.086115<br>C -4.450876 3.259445 -1.432176<br>C -3.194290 2.078615 0.282140<br>C -4.981376 4.102066 -0.448102<br>H -4.714210 3.405720 -2.488494<br>C -3.723059 2.929368 1.264572<br>H -2.430208 1.352144 0.585625<br>C -4.631452 3.938832 0.907527<br>H -5.677031 4.903931 -0.743169<br>H -3.401564 2.806235 2.310038<br>H -5.050613 4.607790 1.675767<br>O -2.747816 0.400618 -4.249367<br>O -3.414843 2.567691 -4.163827<br>Ag -0.367978 -0.039687 -1.013631<br>N 1.770535 -1.074367 -0.912460<br>N 2.492437 -0.891310 0.212105<br>N 0.422049 -1.625359 1.719695<br>N 0.668872 -0.303598 1.811764<br>N 0.956427 1.715703 -0.438286<br>N 1.889323 1.563727 0.525023<br>B 2.059298 0.192835 1.251333<br>C 2.304633 -2.115221 -1.567819<br>C 3.396155 -2.650039 -0.836085<br>C 3.479279 -1.836154 0.306804<br>C -0.791085 -1.839544 2.241145<br>C -1.362049 -0.618724 2.692269<br>C -0.377101 0.351289 2.424077<br>C 1.074479 2.951554 -0.942002<br>C 2.114074 3.648426 -0.271430<br>C 2.620122 2.718639 0.655551<br>H 2.883100 0.292329 2.124541<br>C 1.746797 -2.582316 -2.886315 |

|                                                                                     |                                                                                                                                                                                                                                                                                                                                                                                                                                                                                                                                                                                                                                                                                                                                                                                                                                                                                                                                                                                                                                                                                                                                                                                                                                                                                                                                                                    |
|-------------------------------------------------------------------------------------|--------------------------------------------------------------------------------------------------------------------------------------------------------------------------------------------------------------------------------------------------------------------------------------------------------------------------------------------------------------------------------------------------------------------------------------------------------------------------------------------------------------------------------------------------------------------------------------------------------------------------------------------------------------------------------------------------------------------------------------------------------------------------------------------------------------------------------------------------------------------------------------------------------------------------------------------------------------------------------------------------------------------------------------------------------------------------------------------------------------------------------------------------------------------------------------------------------------------------------------------------------------------------------------------------------------------------------------------------------------------|
|                                                                                     | <p>F 2.697761 -2.655610 -3.836962</p> <p>F 1.182095 -3.815943 -2.776182</p> <p>F 0.774094 -1.737517 -3.336503</p> <p>C 4.403583 -1.915609 1.500988</p> <p>F 5.156470 -0.797109 1.623833</p> <p>F 3.700220 -2.064448 2.651707</p> <p>F 5.241753 -2.966306 1.394821</p> <p>C 0.124642 3.404821 -2.027733</p> <p>F 0.664013 4.371233 -2.792284</p> <p>F -0.189663 2.357433 -2.845966</p> <p>F -1.032371 3.872217 -1.507634</p> <p>C 3.825778 2.813271 1.566414</p> <p>F 4.782551 1.935383 1.168452</p> <p>F 4.363871 4.048091 1.533400</p> <p>F 3.527022 2.533526 2.855820</p> <p>C -1.284273 -3.253058 2.402637</p> <p>F -1.142355 -3.678511 3.682034</p> <p>F -2.614734 -3.356537 2.105097</p> <p>F -0.620925 -4.109236 1.603563</p> <p>C -0.334990 1.814403 2.791458</p> <p>F -0.543673 2.641133 1.731702</p> <p>F -1.279016 2.109160 3.713355</p> <p>F 0.872599 2.138663 3.312182</p> <p>Br -3.107945 -0.365069 3.365489</p> <p>Br 4.450086 -4.119444 -1.349368</p> <p>Br 2.641367 5.428415 -0.567990</p> <p>C -4.851164 -0.771939 -0.272625</p> <p>H -2.541150 -0.452874 0.257926</p> <p>H -4.817687 -0.517317 -1.342096</p> <p>H -5.228725 -0.000982 0.417635</p> <p>C -5.531539 -2.460305 1.379677</p> <p>H -5.919444 -1.561040 1.894092</p> <p>H -6.387908 -3.134448 1.166685</p> <p>H -4.809861 -2.979826 2.035881</p> <p>N -4.888939 -2.054195 0.124351</p> |
| 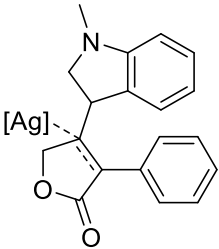 | <p>84</p> <p>I-Ag SCF Done: -11529.2518398 A.U.</p> <p>C 5.077005 -0.127698 1.024683</p> <p>C 5.905446 -1.233226 0.761329</p> <p>C 5.448971 -2.196008 -0.163726</p> <p>C 4.218328 -2.051305 -0.826648</p> <p>C 3.384812 -0.947574 -0.541768</p> <p>C 3.811769 -0.009895 0.397065</p> <p>H 6.893717 -1.334962 1.233712</p> <p>H 6.089241 -3.063527 -0.390035</p> <p>H 3.905088 -2.794457 -1.574734</p> <p>H 2.440384 -0.784470 -1.080778</p> <p>C 3.151634 1.273041 0.888496</p> <p>C 2.180128 1.094952 2.040756</p> <p>C 2.590735 0.322168 3.281034</p> <p>H 2.641072 -0.774107 3.129404</p> <p>H 3.601151 0.655806 3.612507</p> <p>C 0.777219 1.638916 3.855034</p> <p>C 1.092392 1.919118 2.393411</p> <p>C 0.523233 3.114996 1.719960</p> <p>C -0.860932 3.385509 1.849342</p> <p>C 1.326096 4.010045 0.974045</p> <p>C -1.428818 4.503145 1.223327</p> <p>H -1.491197 2.709127 2.441022</p>                                                                                                                                                                                                                                                                                                                                                                                                                                                                    |



|    |           |           |           |
|----|-----------|-----------|-----------|
| C  | 0.754661  | 5.133481  | 0.359542  |
| H  | 2.406619  | 3.845161  | 0.880313  |
| C  | -0.624026 | 5.380328  | 0.476041  |
| H  | -2.510446 | 4.683693  | 1.315950  |
| H  | 1.391937  | 5.810699  | -0.228497 |
| H  | -1.072103 | 6.252295  | -0.024533 |
| O  | 1.618944  | 0.634421  | 4.287722  |
| O  | -0.034775 | 2.174940  | 4.569829  |
| Ag | 0.197748  | 0.141488  | 1.359462  |
| N  | 0.289688  | -1.793011 | 0.233389  |
| N  | -0.102789 | -1.741694 | -1.054737 |
| N  | 0.797988  | 0.781864  | -1.811081 |
| N  | -0.537838 | 0.720511  | -1.617536 |
| N  | -2.014587 | -0.141101 | 0.841706  |
| N  | -2.285576 | -0.675590 | -0.367799 |
| B  | -1.194711 | -0.700516 | -1.484849 |
| C  | 1.031865  | -2.897866 | 0.402607  |
| C  | 1.152959  | -3.584179 | -0.831389 |
| C  | 0.422018  | -2.799662 | -1.744417 |
| C  | 1.075621  | 2.025960  | -2.223979 |
| C  | -0.108039 | 2.807712  | -2.308930 |
| C  | -1.130129 | 1.934342  | -1.903831 |
| C  | -3.100323 | -0.303969 | 1.613861  |
| C  | -4.125265 | -0.957010 | 0.879484  |
| C  | -3.553250 | -1.195397 | -0.383364 |
| H  | -1.689291 | -1.046434 | -2.529201 |
| C  | 1.594936  | -3.233000 | 1.762978  |
| F  | 1.450401  | -4.543287 | 2.040831  |
| F  | 2.910300  | -2.928316 | 1.871689  |
| F  | 0.945024  | -2.525050 | 2.733230  |
| C  | 0.204389  | -2.967193 | -3.231893 |
| F  | -1.040147 | -3.414727 | -3.515188 |
| F  | 0.373080  | -1.784946 | -3.874143 |
| F  | 1.088693  | -3.845761 | -3.747308 |
| C  | -3.096281 | 0.211942  | 3.032544  |
| F  | -3.941473 | -0.475675 | 3.819744  |
| F  | -1.849461 | 0.107880  | 3.570403  |
| F  | -3.449211 | 1.522560  | 3.085559  |
| C  | -4.068977 | -2.013046 | -1.549560 |
| F  | -3.241711 | -3.072498 | -1.765081 |
| F  | -5.297938 | -2.500629 | -1.293883 |
| F  | -4.137770 | -1.310586 | -2.700491 |
| C  | 2.483267  | 2.451362  | -2.555728 |
| F  | 2.569280  | 2.945139  | -3.810389 |
| F  | 2.911305  | 3.442057  | -1.709852 |
| F  | 3.354852  | 1.429051  | -2.441955 |
| C  | -2.605730 | 2.192687  | -1.742295 |
| F  | -2.978165 | 2.193479  | -0.429855 |
| F  | -2.960030 | 3.383256  | -2.258617 |
| F  | -3.347497 | 1.235780  | -2.357573 |
| Br | -0.219503 | 4.575386  | -2.941522 |
| Br | 2.093665  | -5.182127 | -1.126385 |
| Br | -5.859056 | -1.360650 | 1.482515  |
| C  | 4.408871  | 2.052059  | 1.394277  |
| H  | 2.644914  | 1.819365  | 0.076506  |
| H  | 4.186078  | 2.762002  | 2.219183  |
| H  | 4.838082  | 2.629999  | 0.536968  |
| C  | 6.676134  | 1.360511  | 2.207368  |
| H  | 7.304306  | 1.643965  | 1.325486  |
| H  | 6.647814  | 2.219276  | 2.907948  |

|                                                                                     |                                                                                                                                                                                                                                                                                                                                                                                                                                                                                                                                                                                                                                                                                                                                                                                                                                                                                                                                                                                                                                                                                                                                                                                                                                                                                                                                                                                                                                                                                                                                                                          |
|-------------------------------------------------------------------------------------|--------------------------------------------------------------------------------------------------------------------------------------------------------------------------------------------------------------------------------------------------------------------------------------------------------------------------------------------------------------------------------------------------------------------------------------------------------------------------------------------------------------------------------------------------------------------------------------------------------------------------------------------------------------------------------------------------------------------------------------------------------------------------------------------------------------------------------------------------------------------------------------------------------------------------------------------------------------------------------------------------------------------------------------------------------------------------------------------------------------------------------------------------------------------------------------------------------------------------------------------------------------------------------------------------------------------------------------------------------------------------------------------------------------------------------------------------------------------------------------------------------------------------------------------------------------------------|
|                                                                                     | <p>H 7.173732 0.519558 2.731375</p> <p>N 5.323994 0.990802 1.839381</p>                                                                                                                                                                                                                                                                                                                                                                                                                                                                                                                                                                                                                                                                                                                                                                                                                                                                                                                                                                                                                                                                                                                                                                                                                                                                                                                                                                                                                                                                                                  |
| 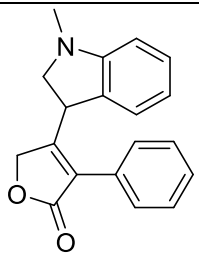   | <p>39</p> <p>I SCF Done: -938.829644473 A.U.</p> <p>C 3.010124 -0.441438 -0.246800</p> <p>C 4.096565 -0.948273 0.491824</p> <p>C 3.862672 -1.360073 1.821019</p> <p>C 2.591228 -1.256697 2.413141</p> <p>C 1.508021 -0.736010 1.667524</p> <p>C 1.726656 -0.339863 0.348812</p> <p>H 5.104486 -1.013658 0.055657</p> <p>H 4.704853 -1.756191 2.410847</p> <p>H 2.440885 -1.569572 3.457518</p> <p>H 0.509280 -0.626029 2.121192</p> <p>C 0.759909 0.203257 -0.704266</p> <p>C -0.288768 1.112911 -0.145049</p> <p>C 0.019355 2.506753 0.341292</p> <p>H 0.776724 2.495545 1.159036</p> <p>H 0.409953 3.168811 -0.465213</p> <p>C -2.217153 2.102911 0.675057</p> <p>C -1.608665 0.857620 0.094038</p> <p>C -2.399613 -0.363905 -0.141729</p> <p>C -3.748491 -0.265428 -0.566647</p> <p>C -1.846360 -1.653923 0.059714</p> <p>C -4.504078 -1.421697 -0.813224</p> <p>H -4.199637 0.728883 -0.692163</p> <p>C -2.607343 -2.806998 -0.187621</p> <p>H -0.821635 -1.758156 0.447294</p> <p>C -3.937116 -2.695868 -0.631067</p> <p>H -5.549263 -1.325856 -1.147774</p> <p>H -2.160299 -3.799712 -0.020055</p> <p>H -4.534584 -3.601361 -0.822437</p> <p>O -1.210980 3.041129 0.826002</p> <p>O -3.365551 2.337814 0.980784</p> <p>C 1.755124 0.825760 -1.726103</p> <p>H 0.254394 -0.660179 -1.193602</p> <p>H 1.964757 1.900037 -1.480153</p> <p>H 1.378747 0.785322 -2.768915</p> <p>C 4.169574 0.407306 -2.272642</p> <p>H 3.925236 0.606641 -3.335713</p> <p>H 4.652128 1.323737 -1.846097</p> <p>H 4.912481 -0.415830 -2.250717</p> <p>N 2.970557 0.018280 -1.563805</p> |
|  | <p>86</p> <p>B1 SCF Done: -11642.9068337 A.U.</p> <p>C -4.267259 0.174576 -1.565348</p> <p>C -4.959566 -0.999737 -1.978460</p> <p>C -4.430097 -2.275139 -1.777418</p> <p>C -3.185143 -2.456490 -1.138964</p> <p>C -2.504454 -1.335363 -0.669749</p> <p>C -3.028582 -0.023761 -0.844222</p> <p>H -5.913915 -0.897770 -2.512254</p> <p>H -4.990496 -3.148658 -2.146831</p> <p>H -2.759979 -3.461304 -1.001478</p> <p>H -1.553859 -1.451379 -0.128270</p> <p>C -2.384171 1.074022 -0.204690</p> <p>C -2.017807 2.124895 0.389081</p> <p>C -2.207589 3.305593 1.254897</p>                                                                                                                                                                                                                                                                                                                                                                                                                                                                                                                                                                                                                                                                                                                                                                                                                                                                                                                                                                                                   |

|    |           |           |           |
|----|-----------|-----------|-----------|
| H  | -1.879826 | 3.069606  | 2.293172  |
| H  | -1.582803 | 4.152933  | 0.910637  |
| C  | -4.687469 | 3.023975  | 1.167368  |
| C  | -4.705695 | 1.762893  | 1.939522  |
| C  | -5.571843 | 0.598947  | 1.608033  |
| C  | -6.901802 | 0.787418  | 1.169501  |
| C  | -5.051956 | -0.713596 | 1.702174  |
| C  | -7.686379 | -0.323958 | 0.817993  |
| H  | -7.302525 | 1.806788  | 1.090357  |
| C  | -5.845731 | -1.815917 | 1.356238  |
| H  | -4.009183 | -0.869953 | 2.008760  |
| C  | -7.164937 | -1.626459 | 0.908654  |
| H  | -8.721292 | -0.166067 | 0.474411  |
| H  | -5.415155 | -2.827302 | 1.412890  |
| H  | -7.784640 | -2.492382 | 0.627468  |
| O  | -3.562466 | 3.822472  | 1.221872  |
| O  | -5.633779 | 3.404537  | 0.499621  |
| N  | -3.926389 | 1.677442  | 3.000534  |
| N  | -3.265939 | 1.633672  | 3.941102  |
| Ag | -0.125171 | 1.118057  | -0.087347 |
| N  | 2.053857  | 1.578135  | 0.190694  |
| N  | 2.942285  | 0.673528  | -0.267908 |
| N  | 0.778175  | -0.263538 | -1.841402 |
| N  | 1.608597  | -1.204658 | -1.347955 |
| N  | 0.610716  | -1.001849 | 1.286815  |
| N  | 1.936390  | -1.183138 | 1.148270  |
| B  | 2.619280  | -0.857394 | -0.211740 |
| C  | 2.608145  | 2.797640  | 0.070956  |
| C  | 3.898366  | 2.688645  | -0.508693 |
| C  | 4.070732  | 1.304833  | -0.712677 |
| C  | 0.014889  | -0.857768 | -2.775919 |
| C  | 0.337969  | -2.233968 | -2.874145 |
| C  | 1.369832  | -2.417276 | -1.935108 |
| C  | 0.292098  | -1.373275 | 2.537991  |
| C  | 1.447001  | -1.821093 | 3.235210  |
| C  | 2.489363  | -1.669575 | 2.302873  |
| H  | 3.630786  | -1.498279 | -0.336060 |
| C  | 1.778891  | 3.999617  | 0.450848  |
| F  | 2.529026  | 5.087482  | 0.686934  |
| F  | 0.887758  | 4.309977  | -0.536462 |
| F  | 1.039569  | 3.744130  | 1.567012  |
| C  | 5.214584  | 0.532011  | -1.333567 |
| F  | 5.853649  | -0.243230 | -0.429131 |
| F  | 4.752377  | -0.282285 | -2.319143 |
| F  | 6.122341  | 1.362804  | -1.880960 |
| C  | -1.149868 | -1.331461 | 2.964775  |
| F  | -1.291162 | -1.198896 | 4.295600  |
| F  | -1.784562 | -0.278777 | 2.370176  |
| F  | -1.824307 | -2.450048 | 2.584105  |
| C  | 3.973673  | -1.915197 | 2.421830  |
| F  | 4.665657  | -0.795357 | 2.072593  |
| F  | 4.322485  | -2.234364 | 3.682545  |
| F  | 4.388495  | -2.916581 | 1.610513  |
| C  | -0.905882 | -0.045368 | -3.649710 |
| F  | -0.404701 | 0.056634  | -4.905055 |
| F  | -2.138236 | -0.586053 | -3.750312 |
| F  | -1.039284 | 1.220352  | -3.164004 |
| C  | 2.158486  | -3.647153 | -1.555023 |
| F  | 2.129465  | -3.841160 | -0.207897 |
| F  | 1.654770  | -4.751743 | -2.137777 |

|  |                                                                                                                                                                                                                                                                                                                                                                                                                                                                                                                                                                                                                                                                                                                                                                                                                                                                                                                                                                                                                                                                                                                                                                                                                                                                                                                                                                                                                                                                                                                                                         |
|--|---------------------------------------------------------------------------------------------------------------------------------------------------------------------------------------------------------------------------------------------------------------------------------------------------------------------------------------------------------------------------------------------------------------------------------------------------------------------------------------------------------------------------------------------------------------------------------------------------------------------------------------------------------------------------------------------------------------------------------------------------------------------------------------------------------------------------------------------------------------------------------------------------------------------------------------------------------------------------------------------------------------------------------------------------------------------------------------------------------------------------------------------------------------------------------------------------------------------------------------------------------------------------------------------------------------------------------------------------------------------------------------------------------------------------------------------------------------------------------------------------------------------------------------------------------|
|  | F 3.457893 -3.537675 -1.918892<br>Br -0.478185 -3.482815 -4.014670<br>Br 5.090041 4.089684 -0.893413<br>Br 1.530405 -2.493782 4.989471<br>C -6.200468 1.603955 -2.108573<br>H -6.431269 1.485680 -3.195582<br>H -6.807096 0.886197 -1.525826<br>H -6.499812 2.621244 -1.786884<br>C -3.953099 2.565381 -2.212668<br>H -3.995480 3.393996 -1.473284<br>H -2.905343 2.256365 -2.354290<br>H -4.318622 2.956272 -3.188941<br>N -4.786052 1.431860 -1.813181                                                                                                                                                                                                                                                                                                                                                                                                                                                                                                                                                                                                                                                                                                                                                                                                                                                                                                                                                                                                                                                                                                |
|  | 86<br>TS-B1C1 SCF Done: -11642.8826827 A.U.<br>Ag -0.353792 -1.101508 0.077374<br>C -2.440216 -0.585809 0.507323<br>N 0.467851 0.817119 -1.594900<br>N 1.792266 0.959036 -1.383734<br>N 1.877522 -1.503805 0.150941<br>N 2.703232 -0.490191 0.480142<br>N 0.593532 0.735279 1.797915<br>N 1.365844 1.563069 1.069700<br>B 2.389300 0.980496 0.053904<br>C 0.292519 0.756867 -2.927096<br>C 1.538127 0.847599 -3.602408<br>C 2.481199 0.976846 -2.569733<br>C 2.431261 -2.640847 0.616918<br>C 3.643378 -2.354456 1.293702<br>C 3.776189 -0.956317 1.184370<br>C -0.140835 1.504048 2.614473<br>C 0.155703 2.879037 2.407707<br>C 1.133059 2.874466 1.398445<br>H 3.402386 1.633353 0.059678<br>C -1.065534 0.564877 -3.546056<br>F -1.339752 1.511213 -4.467219<br>F -1.155593 -0.643515 -4.166377<br>F -2.050657 0.604235 -2.607330<br>C 3.985570 1.089753 -2.619624<br>F 4.420813 2.271277 -2.122639<br>F 4.564803 0.099600 -1.885115<br>F 4.443868 0.980056 -3.881438<br>C -1.144823 0.892881 3.553599<br>F -2.410611 1.339990 3.267328<br>F -1.160542 -0.452920 3.458447<br>F -0.898456 1.225259 4.839943<br>C 1.868069 4.001083 0.717992<br>F 1.816196 3.856182 -0.635564<br>F 1.327005 5.196532 1.023684<br>F 3.175461 4.033162 1.068871<br>C 1.692053 -3.933532 0.392934<br>F 1.276417 -4.025584 -0.899563<br>F 2.438916 -5.015031 0.668097<br>F 0.570397 -3.994053 1.172834<br>C 4.833693 -0.018811 1.725855<br>F 4.254421 1.001865 2.413261<br>F 5.664854 -0.658821 2.571017<br>F 5.583749 0.526448 0.741722<br>Br 4.807045 -3.576603 2.122307 |

|  |    |           |           |           |
|--|----|-----------|-----------|-----------|
|  | Br | 1.796915  | 0.806232  | -5.464265 |
|  | Br | -0.656163 | 4.334816  | 3.279955  |
|  | C  | -4.178524 | 2.397570  | -1.073685 |
|  | O  | -4.886355 | 2.862183  | -1.933094 |
|  | O  | -2.910408 | 2.794892  | -0.870185 |
|  | C  | -2.664960 | 0.649661  | 0.223485  |
|  | C  | -4.636333 | 1.260690  | -0.114073 |
|  | C  | -5.416437 | 0.118038  | -0.673275 |
|  | C  | -5.271538 | -0.211791 | -2.038901 |
|  | C  | -6.225799 | -0.693695 | 0.151345  |
|  | C  | -5.920379 | -1.341929 | -2.560343 |
|  | H  | -4.641532 | 0.404714  | -2.694202 |
|  | C  | -6.859162 | -1.828275 | -0.373411 |
|  | C  | -6.707304 | -2.159351 | -1.731811 |
|  | H  | -5.796604 | -1.588168 | -3.626385 |
|  | H  | -7.468614 | -2.460966 | 0.289684  |
|  | H  | -7.203628 | -3.051931 | -2.143179 |
|  | H  | -6.345404 | -0.457501 | 1.218733  |
|  | N  | -4.978743 | 1.712652  | 1.096319  |
|  | N  | -5.188612 | 2.084019  | 2.164214  |
|  | C  | -3.181988 | -1.712691 | 1.047531  |
|  | C  | -3.951076 | -1.528085 | 2.222688  |
|  | C  | -3.079147 | -3.015724 | 0.467116  |
|  | C  | -4.630234 | -2.598958 | 2.816545  |
|  | H  | -3.971556 | -0.528109 | 2.678785  |
|  | C  | -3.782621 | -4.079772 | 1.072654  |
|  | C  | -4.550391 | -3.874972 | 2.231427  |
|  | H  | -5.212971 | -2.439805 | 3.736876  |
|  | H  | -3.737769 | -5.085723 | 0.633052  |
|  | H  | -5.086125 | -4.725571 | 2.681892  |
|  | N  | -2.244154 | -3.197268 | -0.672349 |
|  | C  | -2.707183 | -2.542887 | -1.907352 |
|  | C  | -1.797683 | -4.563927 | -0.934594 |
|  | H  | -3.023307 | -1.505109 | -1.708041 |
|  | H  | -1.881521 | -2.511375 | -2.644346 |
|  | H  | -3.576038 | -3.086146 | -2.353009 |
|  | H  | -1.381945 | -5.012547 | -0.013416 |
|  | H  | -2.614848 | -5.218498 | -1.329004 |
|  | H  | -0.992119 | -4.533170 | -1.692264 |
|  | C  | -2.116024 | 2.006138  | 0.051288  |
|  | H  | -1.090079 | 1.948244  | -0.374716 |
|  | H  | -2.083910 | 2.545804  | 1.022534  |

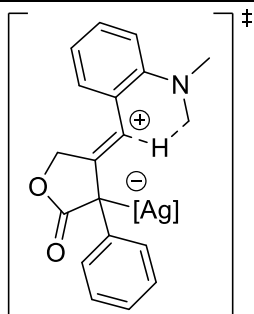

84

TS-DE1 SCF Done: -11533.3767973 A.U.

|   |           |           |           |
|---|-----------|-----------|-----------|
| C | -5.239092 | 0.303079  | 0.809102  |
| C | -5.890104 | 1.303795  | 0.032034  |
| C | -5.284010 | 2.531073  | -0.202882 |
| C | -3.974713 | 2.803152  | 0.293682  |
| C | -3.318677 | 1.852209  | 1.047041  |
| C | -3.941644 | 0.604148  | 1.422669  |
| H | -6.885973 | 1.101158  | -0.386841 |
| H | -5.812214 | 3.290820  | -0.799315 |
| H | -3.481531 | 3.762044  | 0.071218  |
| H | -2.307727 | 2.043486  | 1.424730  |
| C | -3.290824 | -0.284546 | 2.272202  |
| C | -2.070959 | -0.297410 | 2.928273  |
| C | -1.819435 | 0.719464  | 4.057284  |
| H | -1.609894 | 1.740293  | 3.677578  |
| H | -2.702902 | 0.771099  | 4.728718  |

|    |           |           |           |
|----|-----------|-----------|-----------|
| C  | -0.261433 | -0.984312 | 4.278127  |
| C  | -1.023501 | -1.279794 | 3.017776  |
| C  | -1.043767 | -2.623015 | 2.374074  |
| C  | -0.377027 | -3.735887 | 2.943436  |
| C  | -1.741759 | -2.815198 | 1.155149  |
| C  | -0.426439 | -4.990813 | 2.314847  |
| H  | 0.195026  | -3.598225 | 3.870308  |
| C  | -1.800041 | -4.071499 | 0.539670  |
| H  | -2.229735 | -1.960702 | 0.665106  |
| C  | -1.139384 | -5.170994 | 1.116890  |
| H  | 0.105030  | -5.840483 | 2.772587  |
| H  | -2.354805 | -4.182031 | -0.403188 |
| H  | -1.172628 | -6.157413 | 0.628170  |
| O  | -0.696647 | 0.238229  | 4.785049  |
| O  | 0.606660  | -1.617898 | 4.838354  |
| Ag | 0.240542  | -0.089418 | 1.554571  |
| N  | 2.169853  | -0.610166 | 0.399207  |
| N  | 2.414668  | 0.088093  | -0.727922 |
| N  | 0.532536  | 1.900795  | 0.385573  |
| N  | 0.560438  | 1.789793  | -0.956531 |
| N  | -1.125117 | -0.278756 | -1.592282 |
| N  | 0.175351  | -0.594819 | -1.744884 |
| B  | 1.238189  | 0.549766  | -1.628436 |
| C  | 3.351728  | -0.880852 | 0.975301  |
| C  | 4.406631  | -0.315423 | 0.211426  |
| C  | 3.759238  | 0.302031  | -0.874904 |
| C  | 0.028197  | 3.112959  | 0.678131  |
| C  | -0.318998 | 3.796010  | -0.513225 |
| C  | 0.038296  | 2.906690  | -1.543087 |
| C  | -1.828060 | -1.335286 | -2.026385 |
| C  | -0.966967 | -2.377349 | -2.462367 |
| C  | 0.322872  | -1.859659 | -2.269148 |
| H  | 1.651163  | 0.865086  | -2.718761 |
| C  | 3.351767  | -1.574037 | 2.317355  |
| F  | 4.534275  | -2.157702 | 2.589877  |
| F  | 3.087843  | -0.675668 | 3.306001  |
| F  | 2.387370  | -2.522634 | 2.364325  |
| C  | 4.305743  | 1.152116  | -1.999326 |
| F  | 4.125727  | 0.587623  | -3.214881 |
| F  | 3.679055  | 2.362147  | -2.017072 |
| F  | 5.624169  | 1.379783  | -1.844026 |
| C  | -3.326440 | -1.315329 | -2.029222 |
| F  | -3.845549 | -2.195714 | -1.103248 |
| F  | -3.817104 | -0.095015 | -1.722720 |
| F  | -3.842322 | -1.682562 | -3.224097 |
| C  | 1.663493  | -2.514563 | -2.487431 |
| F  | 2.212742  | -2.934749 | -1.317144 |
| F  | 1.559508  | -3.587924 | -3.295696 |
| F  | 2.549599  | -1.656564 | -3.056166 |
| C  | -0.014572 | 3.618897  | 2.096487  |
| F  | 0.700199  | 4.753655  | 2.233672  |
| F  | -1.292068 | 3.898016  | 2.493881  |
| F  | 0.481764  | 2.700683  | 2.962446  |
| C  | -0.039019 | 3.063612  | -3.044917 |
| F  | -0.523587 | 1.944229  | -3.634446 |
| F  | -0.852727 | 4.088222  | -3.377817 |
| F  | 1.180600  | 3.312171  | -3.578215 |
| Br | -1.079025 | 5.513474  | -0.620635 |
| Br | 6.247013  | -0.403774 | 0.585464  |
| Br | -1.486734 | -4.048255 | -3.158723 |

|                                                                                   |                                                                                                                                                                                                                                                                                                                                                                                                                                                                                                                                                                                                                                                                                                                                                                                                                                                                                                                                                                                                                                                                                                                                                                                                                                                                                                                                                                                                                                                                                                                                                                                                                                                                                                                 |
|-----------------------------------------------------------------------------------|-----------------------------------------------------------------------------------------------------------------------------------------------------------------------------------------------------------------------------------------------------------------------------------------------------------------------------------------------------------------------------------------------------------------------------------------------------------------------------------------------------------------------------------------------------------------------------------------------------------------------------------------------------------------------------------------------------------------------------------------------------------------------------------------------------------------------------------------------------------------------------------------------------------------------------------------------------------------------------------------------------------------------------------------------------------------------------------------------------------------------------------------------------------------------------------------------------------------------------------------------------------------------------------------------------------------------------------------------------------------------------------------------------------------------------------------------------------------------------------------------------------------------------------------------------------------------------------------------------------------------------------------------------------------------------------------------------------------|
|                                                                                   | C -5.243467 -1.874905 1.820905<br>H -5.572969 -1.653431 2.856119<br>H -5.323898 -2.939019 1.540261<br>H -4.024867 -1.462765 2.084117<br>C -6.574015 -1.491445 -0.235358<br>H -6.441348 -2.586724 -0.312084<br>H -7.643291 -1.282429 -0.016545<br>H -6.294661 -1.030993 -1.201708<br>N -5.713504 -0.989607 0.841440                                                                                                                                                                                                                                                                                                                                                                                                                                                                                                                                                                                                                                                                                                                                                                                                                                                                                                                                                                                                                                                                                                                                                                                                                                                                                                                                                                                              |
| 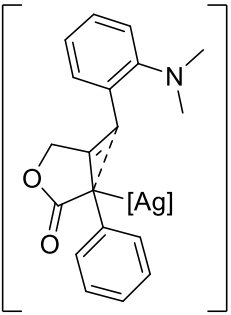 | 84<br>TS-DE2 SCF Done: -11529.1257329 A.U.<br>C 5.685917 -0.959281 -0.794845<br>C 6.223188 -2.260431 -0.655492<br>C 6.229668 -2.913956 0.584290<br>C 5.693942 -2.289014 1.730391<br>C 5.117278 -1.023026 1.627046<br>C 5.072332 -0.351321 0.368393<br>H 6.673134 -2.753404 -1.529218<br>H 6.676665 -3.917405 0.662140<br>H 5.703920 -2.804237 2.702851<br>H 4.636900 -0.552457 2.494391<br>C 4.231640 0.756373 0.183507<br>C 3.149676 1.496074 0.013283<br>C 2.881077 2.913776 -0.367855<br>H 1.823578 3.216900 -0.215227<br>H 3.563806 3.642584 0.106353<br>C 3.126406 1.581166 -2.315702<br>C 2.954268 0.637988 -1.179062<br>C 2.449125 -0.738092 -1.269713<br>C 2.343528 -1.412585 -2.535071<br>C 2.264544 -1.529202 -0.080756<br>C 2.107870 -2.795835 -2.585262<br>H 2.504028 -0.828581 -3.452513<br>C 2.036988 -2.909913 -0.158536<br>H 2.365853 -1.050815 0.901872<br>C 1.969971 -3.552696 -1.406997<br>H 2.027214 -3.287139 -3.566948<br>H 1.913557 -3.480094 0.774103<br>H 1.791805 -4.636676 -1.463309<br>O 3.152390 2.875128 -1.808811<br>O 3.188206 1.377823 -3.515811<br>Ag 0.185737 -0.219066 -1.243151<br>N -1.794701 -1.311894 -0.843703<br>N -2.609945 -0.846891 0.124225<br>N -1.171882 1.629563 -0.846169<br>N -1.958475 1.620383 0.250352<br>N 0.051643 1.072965 1.915199<br>N -0.747566 0.002605 1.721062<br>B -2.154294 0.307473 1.069106<br>C -2.450180 -2.271778 -1.510784<br>C -3.742081 -2.456011 -0.950898<br>C -3.811131 -1.511839 0.089092<br>C -1.091260 2.898148 -1.274505<br>C -1.834412 3.751793 -0.419960<br>C -2.369124 2.890733 0.553713<br>C 1.075490 0.668060 2.676491<br>C 0.946147 -0.710787 2.998147<br>C -0.250084 -1.104476 2.372624<br>H -2.988389 0.473388 1.922809 |

|    |           |           |           |
|----|-----------|-----------|-----------|
| C  | -1.762280 | -3.010246 | -2.632304 |
| F  | -0.874815 | -2.196929 | -3.273419 |
| F  | -1.063770 | -4.078520 | -2.171472 |
| F  | -2.639591 | -3.457357 | -3.551328 |
| C  | -4.981263 | -1.121895 | 0.968125  |
| F  | -4.699548 | -1.215320 | 2.287406  |
| F  | -5.345976 | 0.161525  | 0.715978  |
| F  | -6.050740 | -1.905722 | 0.725902  |
| C  | 2.062131  | 1.677919  | 3.203053  |
| F  | 3.346066  | 1.223010  | 3.144979  |
| F  | 2.012130  | 2.836301  | 2.503992  |
| F  | 1.812075  | 1.970295  | 4.501152  |
| C  | -0.923780 | -2.451424 | 2.346706  |
| F  | -0.392400 | -3.286798 | 3.260720  |
| F  | -2.250762 | -2.341432 | 2.606451  |
| F  | -0.808657 | -3.061635 | 1.131845  |
| C  | -0.346020 | 3.263654  | -2.533076 |
| F  | -1.186343 | 3.740027  | -3.478574 |
| F  | 0.582923  | 4.216190  | -2.290081 |
| F  | 0.291036  | 2.181708  | -3.057284 |
| C  | -3.205741 | 3.196926  | 1.776270  |
| F  | -2.587730 | 2.777040  | 2.908678  |
| F  | -3.419165 | 4.522791  | 1.895042  |
| F  | -4.413569 | 2.587841  | 1.719636  |
| Br | -2.022927 | 5.610812  | -0.621245 |
| Br | -5.027143 | -3.717875 | -1.492565 |
| Br | 2.182441  | -1.763048 | 3.957551  |
| C  | 5.694576  | -1.039726 | -3.255445 |
| H  | 5.113338  | -1.977014 | -3.155463 |
| H  | 5.217326  | -0.427490 | -4.048484 |
| H  | 6.737225  | -1.284956 | -3.575010 |
| C  | 6.175808  | 1.070723  | -2.119269 |
| H  | 7.275202  | 1.048796  | -2.314056 |
| H  | 5.680743  | 1.607911  | -2.951973 |
| H  | 5.997136  | 1.642688  | -1.189298 |
| N  | 5.634526  | -0.286576 | -2.013052 |



## S12 References

- [1] K. Dong, C. Pei, Q. Zeng, H. Wei, M.P. Doyle, X. Xu, *ACS Catalysis* **2018**, *8*, 9543-9549.
- [2] H. Li, J.L. Petersen, K.K Wang, *J. Org. Chem.* **2003**, *68*, 5512-5518.
- [3] Y. Chen, C.-H. Cho, F. Shi, R.C. Larock, *J. Org. Chem.* **2009**, *74*, 6802-6811.
- [4] B. Yao, Q. Wang, J. Zhu, *Angew. Chem. Int. Ed.* **2012**, *51*, 5170-5174.
- [5] H. Song, Y. Liu, Q. Wang, *Org. Lett.* **2013**, *15*, 3274-3277.
- [6] T. Ohmura, K. Yagi, T. Torigoe, M. Suginome, *Synthesis* **2021**, 3057-3064.
- [7] Gaussian 16, Revision C.01: M. J. Frisch, G. W. Trucks, H. B. Schlegel, G. E. Scuseria, M. A. Robb, J. R. Cheeseman, G. Scalmani, V. Barone, G. A. Petersson, H. Nakatsuji, X. Li, M. Caricato, A. V. Marenich, J. Bloino, B. G. Janesko, R. Gomperts, B. Mennucci, H. P. Hratchian, J. V. Ortiz, A. F. Izmaylov, J. L. Sonnenberg, Williams, F. Ding, F. Lipparini, F. Egidi, J. Goings, B. Peng, A. Petrone, T. Henderson, D. Ranasinghe, V. G. Zakrzewski, J. Gao, N. Rega, G. Zheng, W. Liang, M. Hada, M. Ehara, K. Toyota, R. Fukuda, J. Hasegawa, M. Ishida, T. Nakajima, Y. Honda, O. Kitao, H. Nakai, T. Vreven, K. Throssell, J. A. Montgomery Jr., J. E. Peralta, F. Ogliaro, M. J. Bearpark, J. J. Heyd, E. N. Brothers, K. N. Kudin, V. N. Staroverov, T. A. Keith, R. Kobayashi, J. Normand, K. Raghavachari, A. P. Rendell, J. C. Burant, S. S. Iyengar, J. Tomasi, M. Cossi, J. M. Millam, M. Klene, C. Adamo, R. Cammi, J. W. Ochterski, R. L. Martin, K. Morokuma, O. Farkas, J. B. Foresman and D. J. Fox, Gaussian, Inc., Wallingford CT, 2016.
- [8] A. Becke, *Phys. Rev. A* **1988**, *38*, 3098-3100.
- [9] J.P. Perdew, *Phys. Rev. B* **1986**, *33*, 8822-8824.
- [10] J.P. Perdew, *Phys. Rev. B* **1986**, *34*, 7406-7406.
- [11] S. Grimme, J. Antony, S. Ehrlich, H. Krieg, *J. Chem. Phys.* **2010**, *132*, 154104.
- [12] S. Schäfer, H. Horn, R. Ahlrichs, *J. Chem. Phys.* **1992**, *97*, 2571-2577.
- [13] U. Haeusermann, M. Dolg, H. Stoll, H. Preuss, P. Schwerdtfeger, R.M. Pitzer, *Mol. Phys.* **1993**, *78*, 1211-1224.
- [14] W. Küchle, M. Dolg, H. Stoll, H. Preuss, *J. Chem. Phys.* **1994**, *100*, 7535-7542.
- [15] T. Leininger, A. Nicklass, H. Stoll, M. Dolg, P. Schwerdtfeger, *J. Chem. Phys.* **1996**, *105*, 1052-1059.
- [16] A.D. Becke, *J. Chem. Phys.* **1993**, *98*, 5648-5652.
- [17] C. Lee, W. Yang, R.G. Parr, *Phys. Rev. B* **1988**, *37*, 785-789.
- [18] F. Weigend, R. Ahlrichs, *Phys. Chem. Chem. Phys.* **2005**, *7*, 3297-3305.
- [19] A.V. Marenich, C.J. Cramer, D.G. Truhlar, *J. Phys. Chem. B* **2009**, *113*, 6378-6396.
- [20] S. Kozuch, S. Shaik, *Acc. Chem. Res.* **2011**, *44*, 101-110.
- [21] J. A. Luque-Urrutia, A. Poater, *Inorg. Chem.* **2017**, *56*, 14383-14387.
- [22] J. P. Martínez, M. Vizuete, L. M. Arellano, A. Poater, F. M. Bickelhaupt, F. Langa, M. Solà, *Nanoscale* **2018**, *10*, 15078-15089.

# S13 NMR SPECTRA

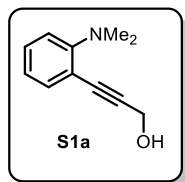

<sup>1</sup>H NMR (400 MHz, CDCl<sub>3</sub>)

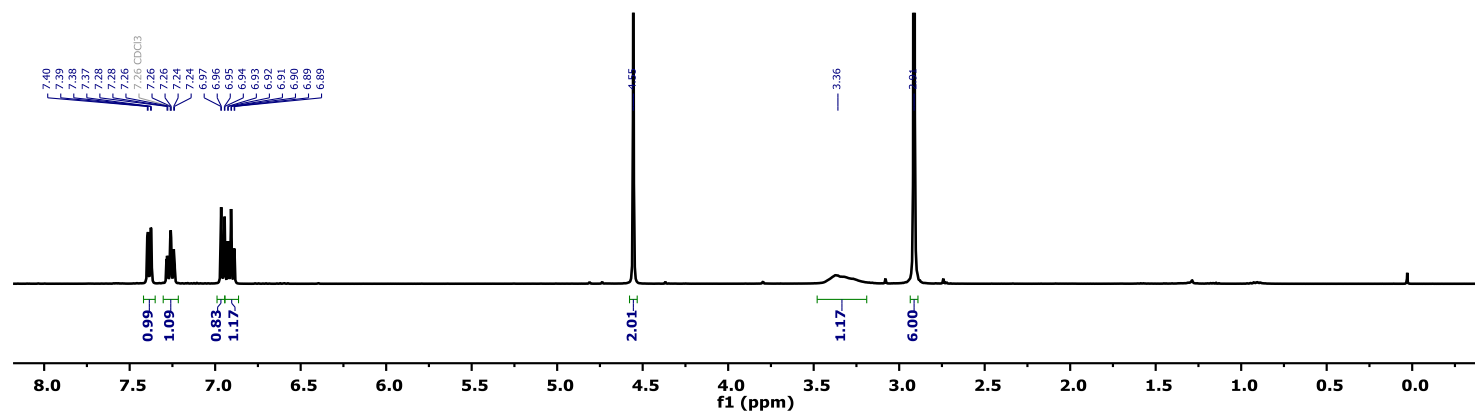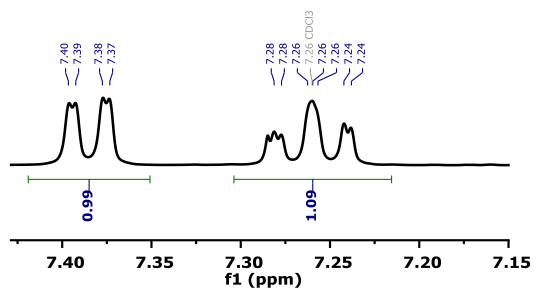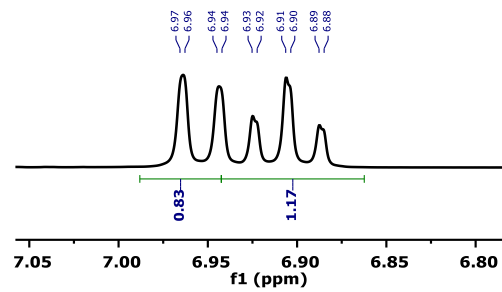

$^{13}\text{C}\{^1\text{H}\}$  NMR ( $\text{CDCl}_3$ , 101 MHz)

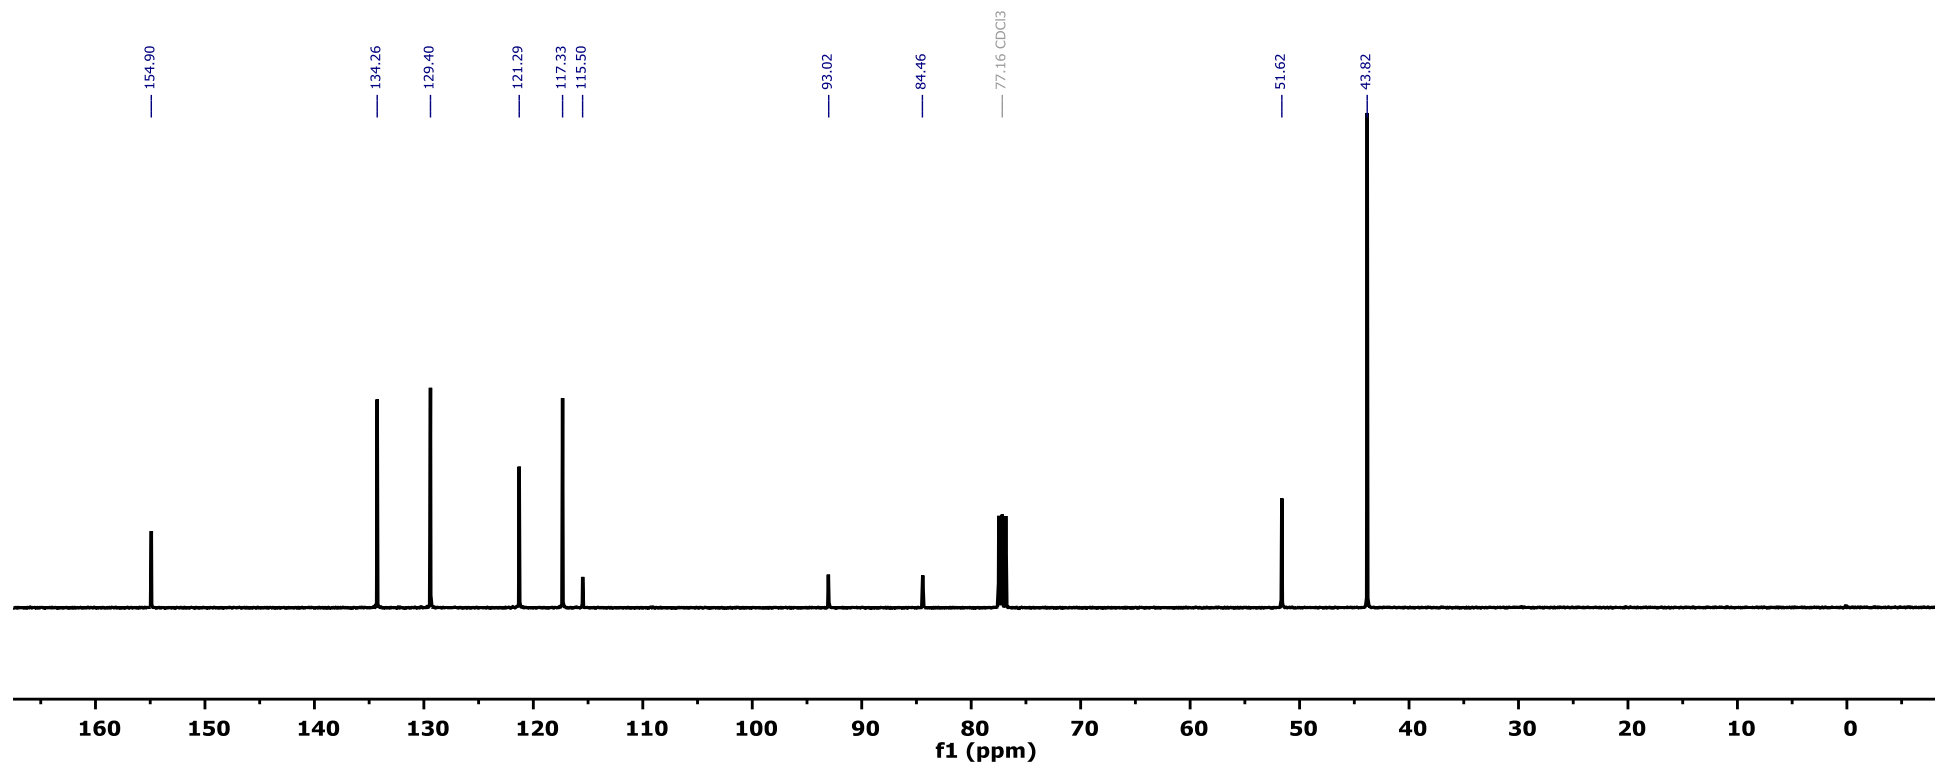

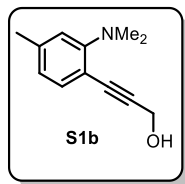

<sup>1</sup>H NMR (400 MHz, CDCl<sub>3</sub>)

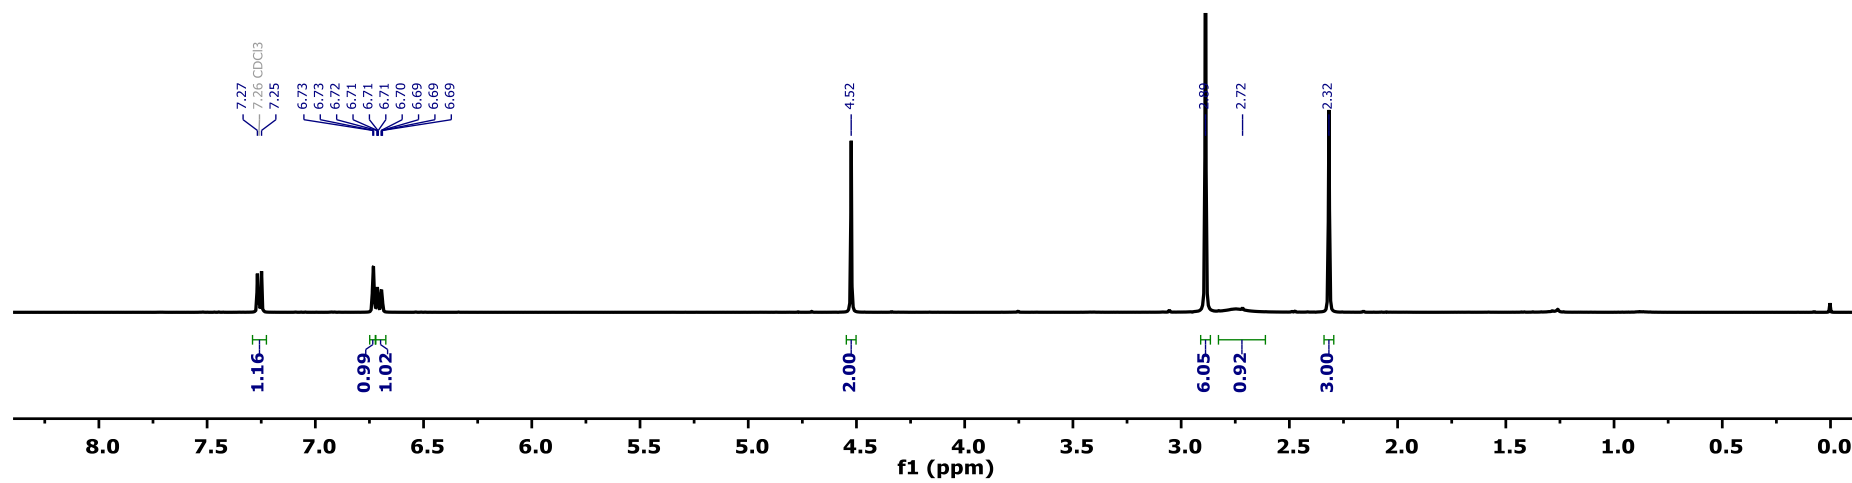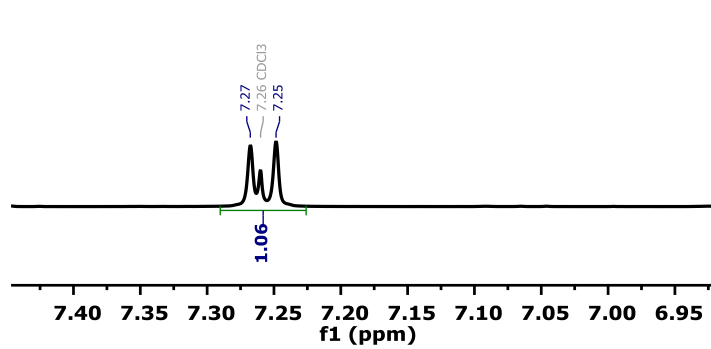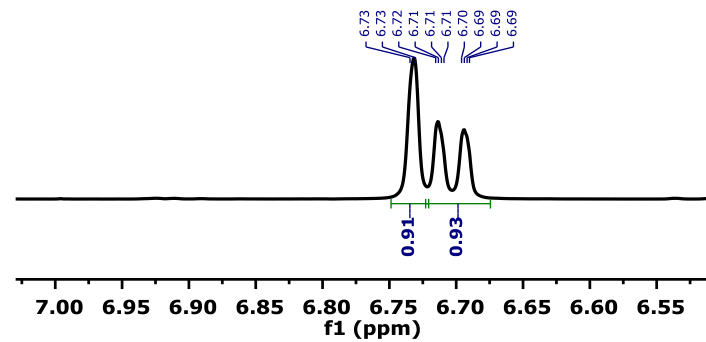

$^{13}\text{C}\{\text{H}\}$  NMR ( $\text{CDCl}_3$ , 101 MHz)

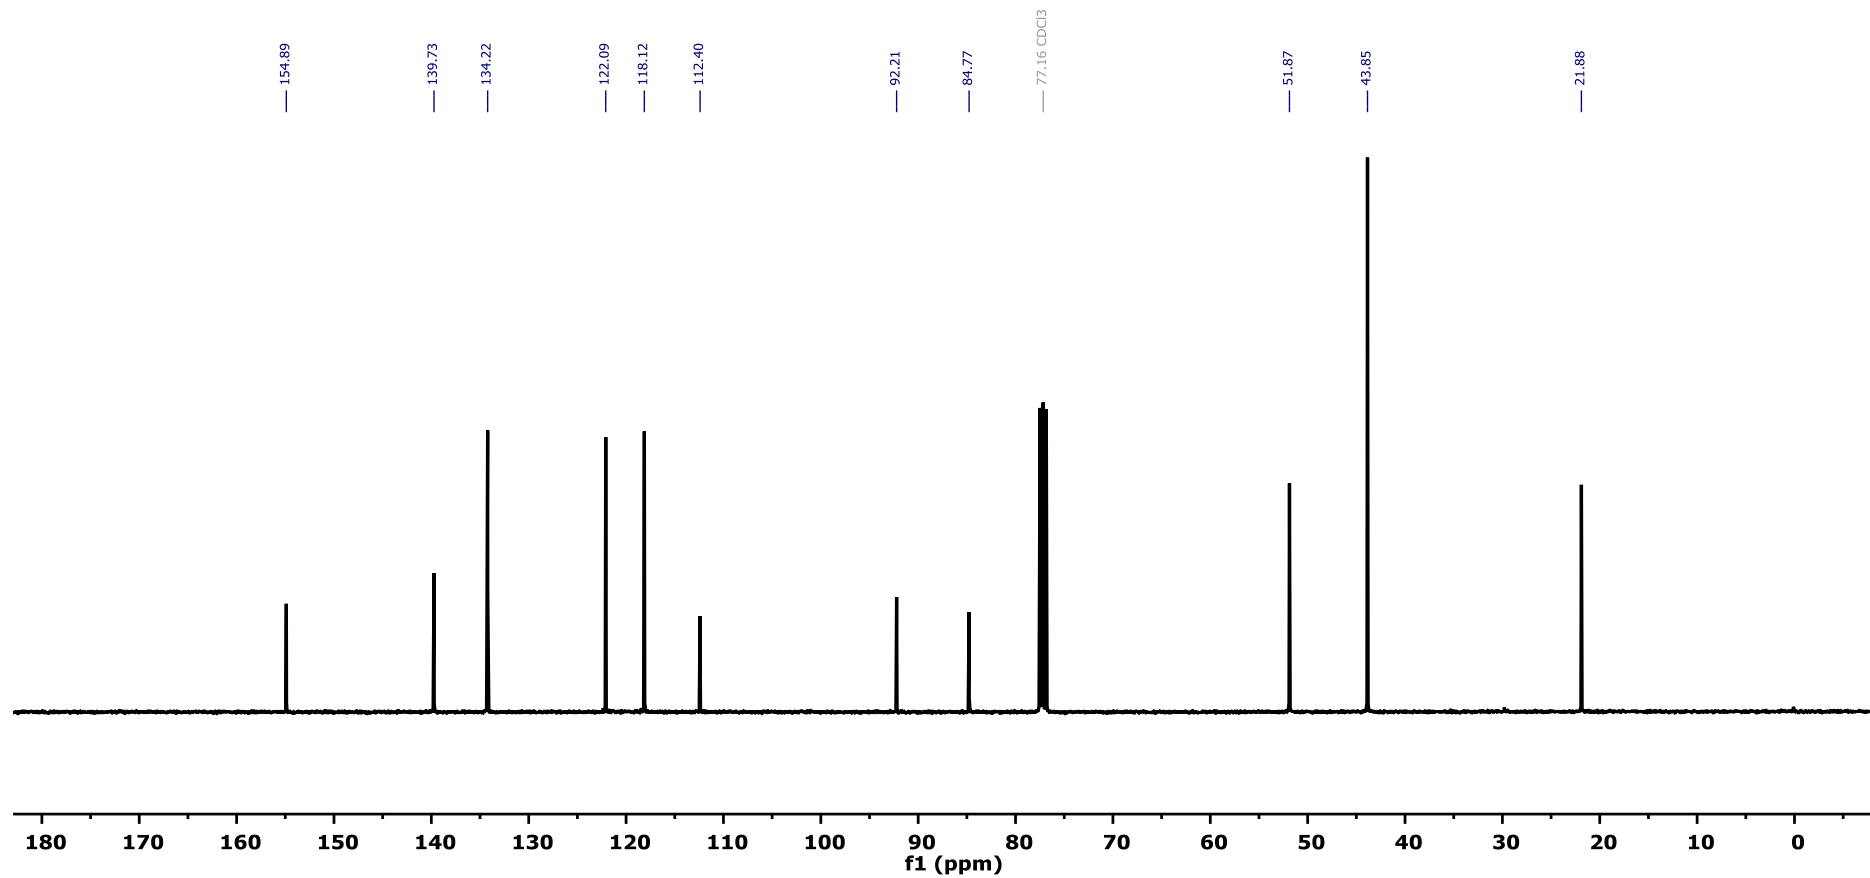

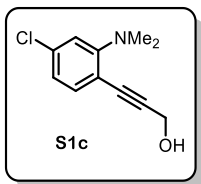

$^1\text{H NMR}$  (400 MHz,  $\text{CDCl}_3$ )

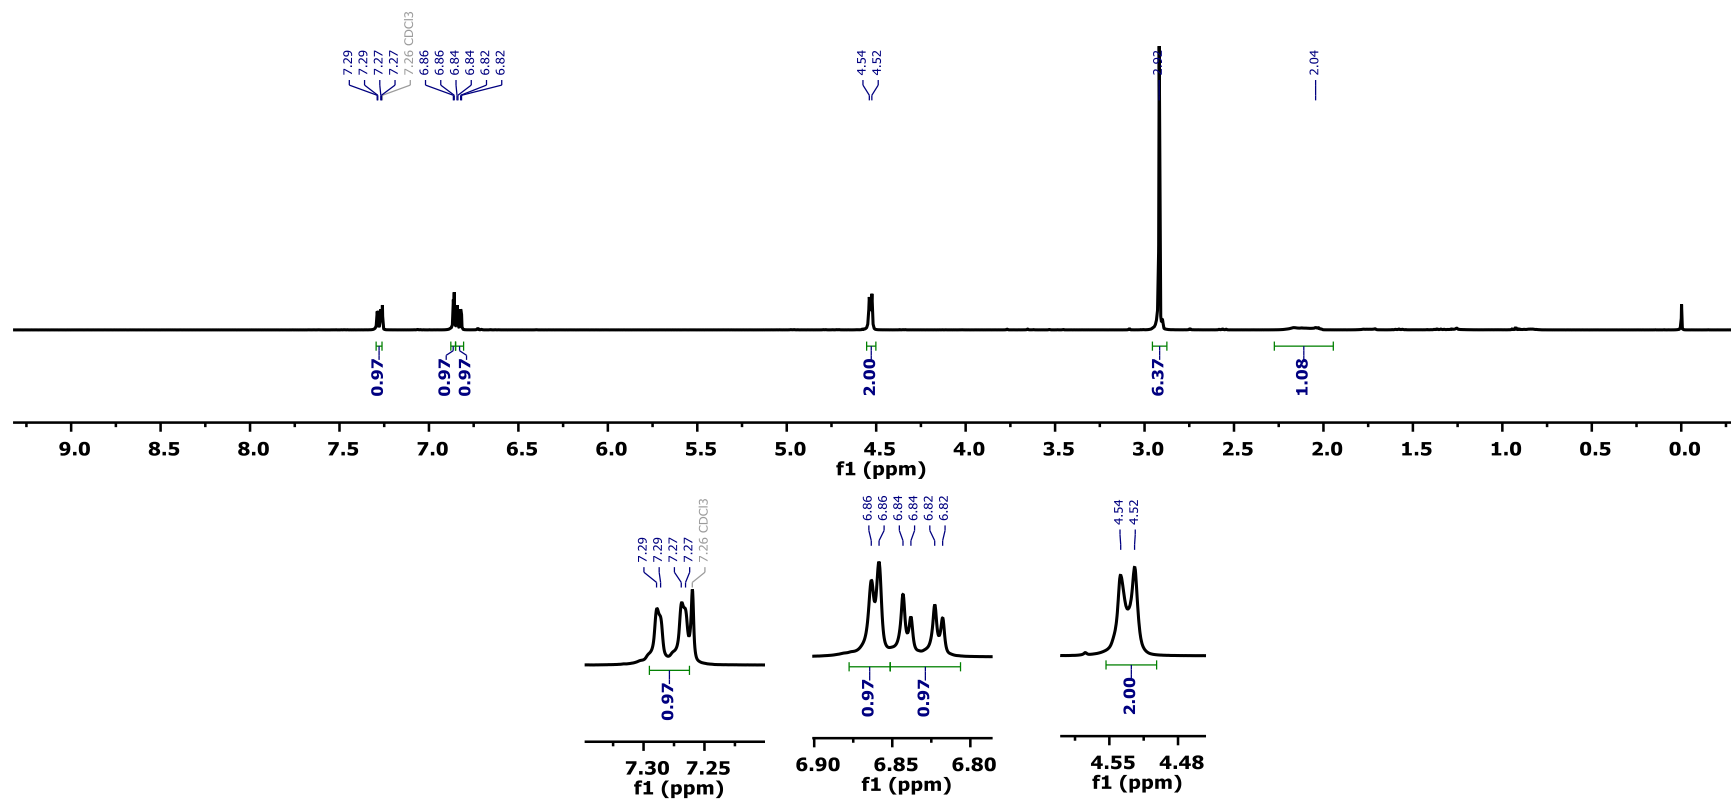

$^{13}\text{C}\{\text{H}\}$  NMR ( $\text{CDCl}_3$ , 101 MHz)

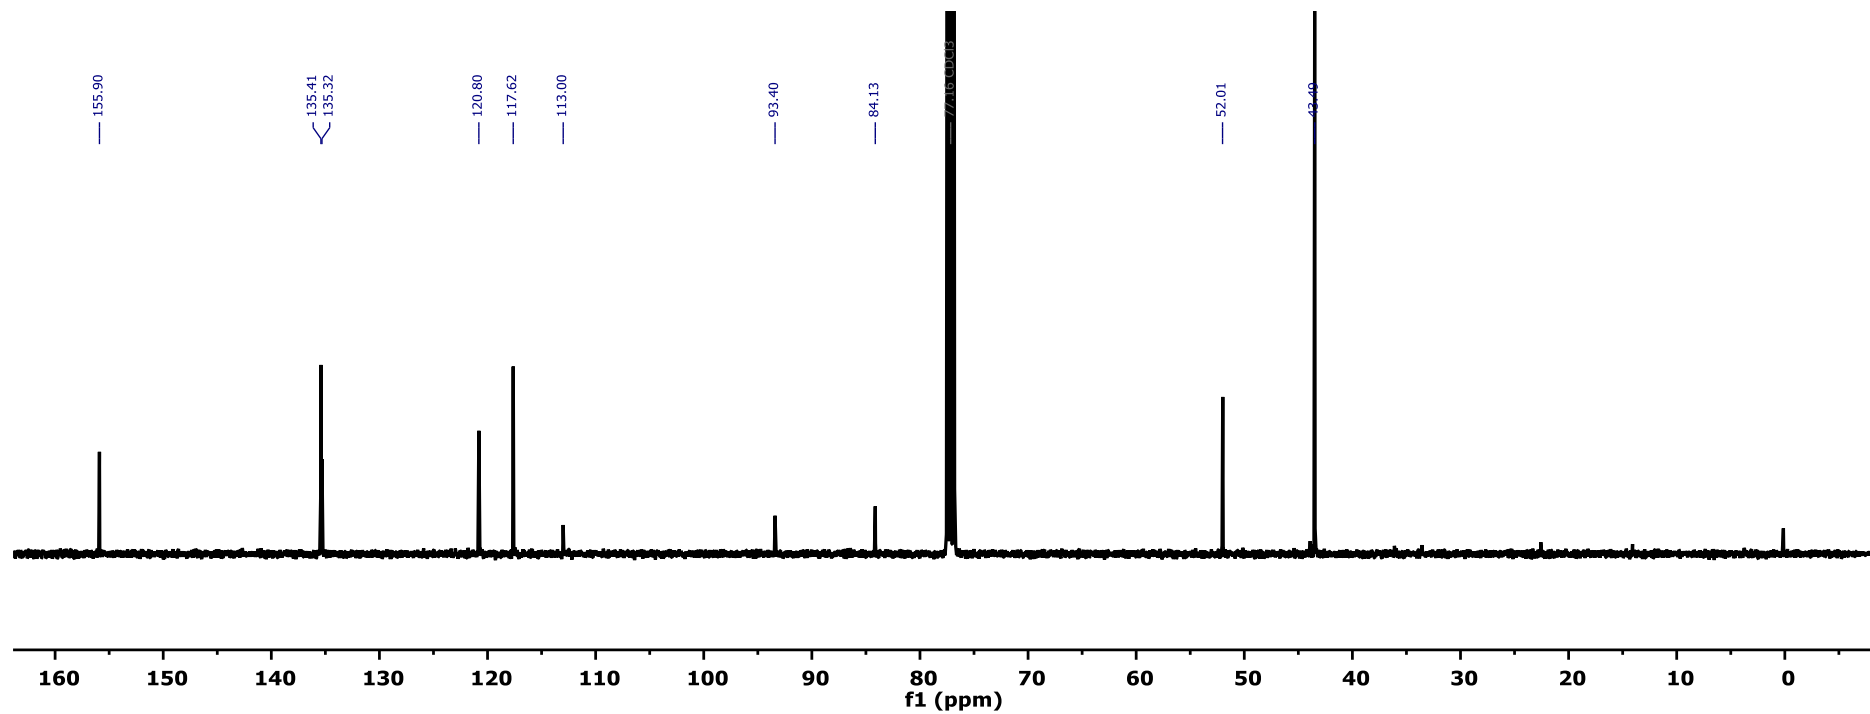

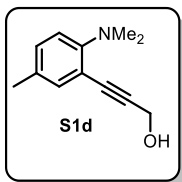

<sup>1</sup>H NMR (400 MHz, CDCl<sub>3</sub>)

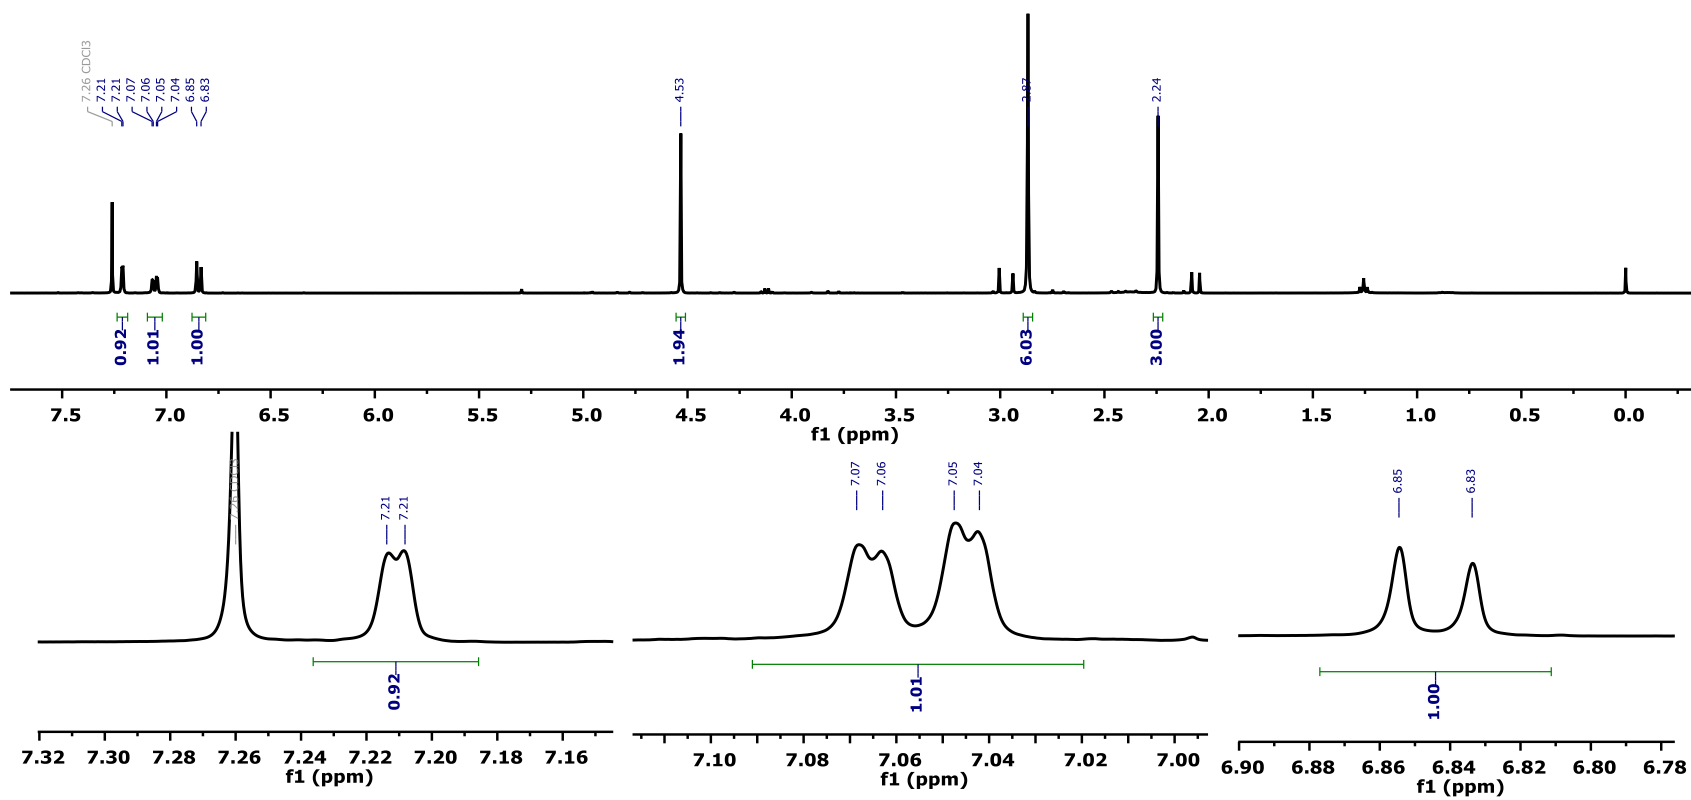



$^{13}\text{C}\{\text{H}\}$  NMR ( $\text{CDCl}_3$ , 101 MHz)

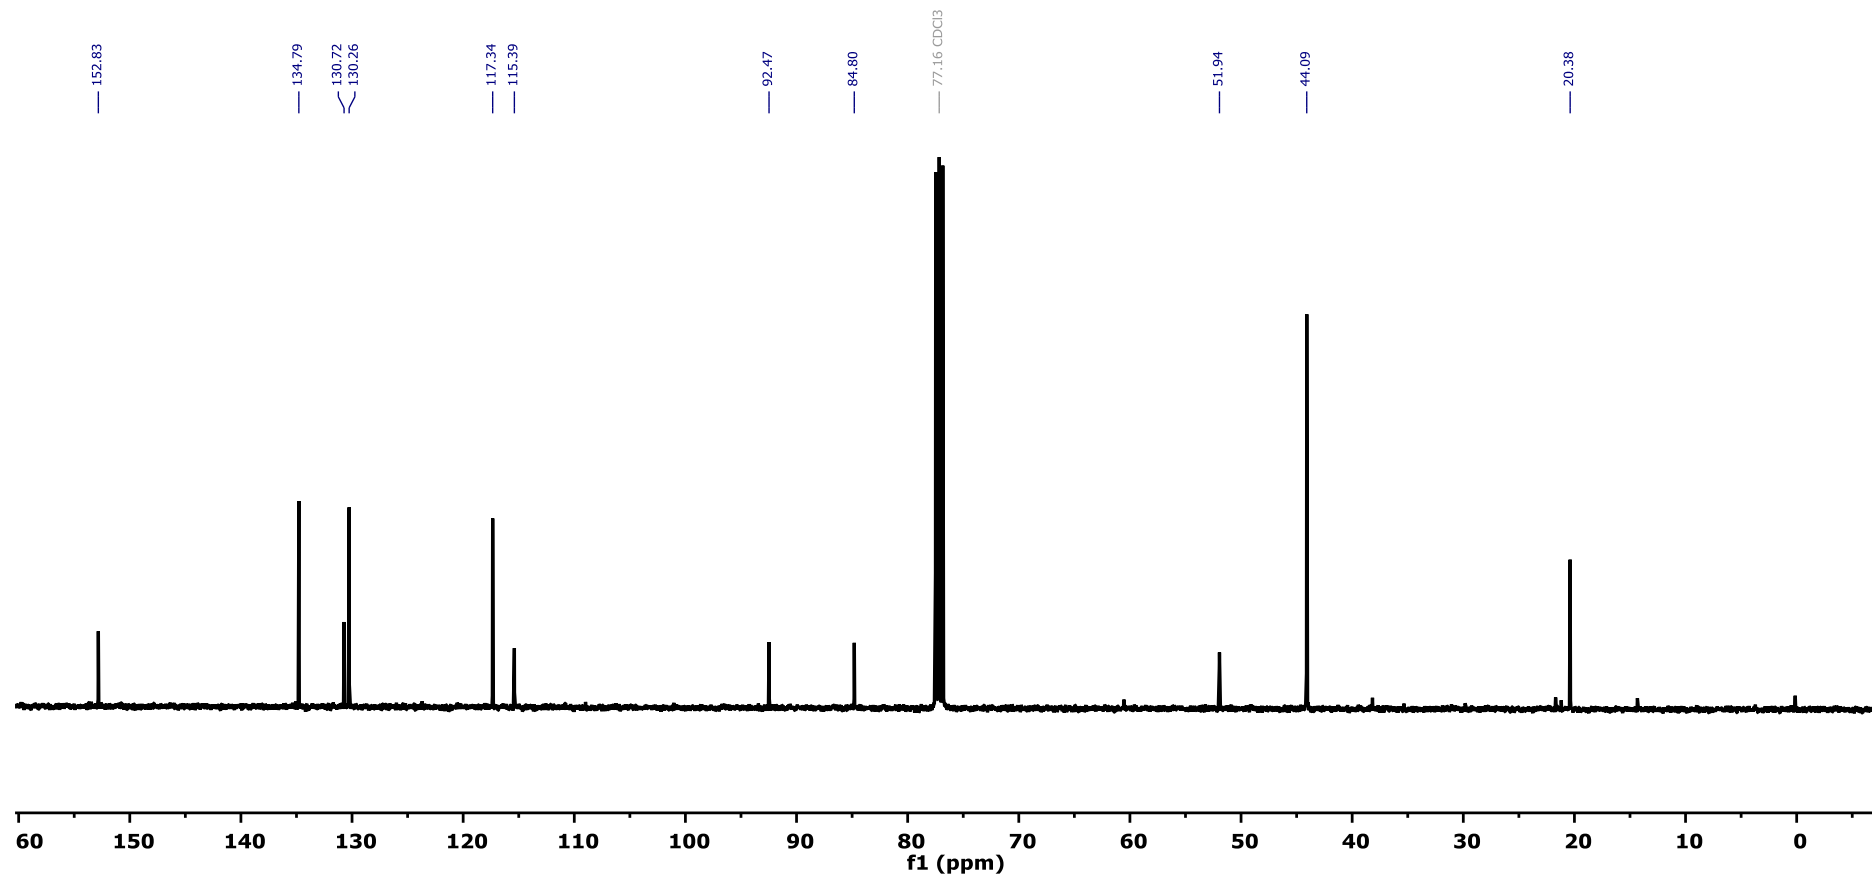

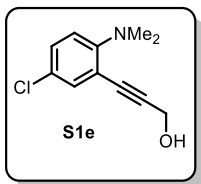

**<sup>1</sup>H NMR (400 MHz, CDCl<sub>3</sub>)**

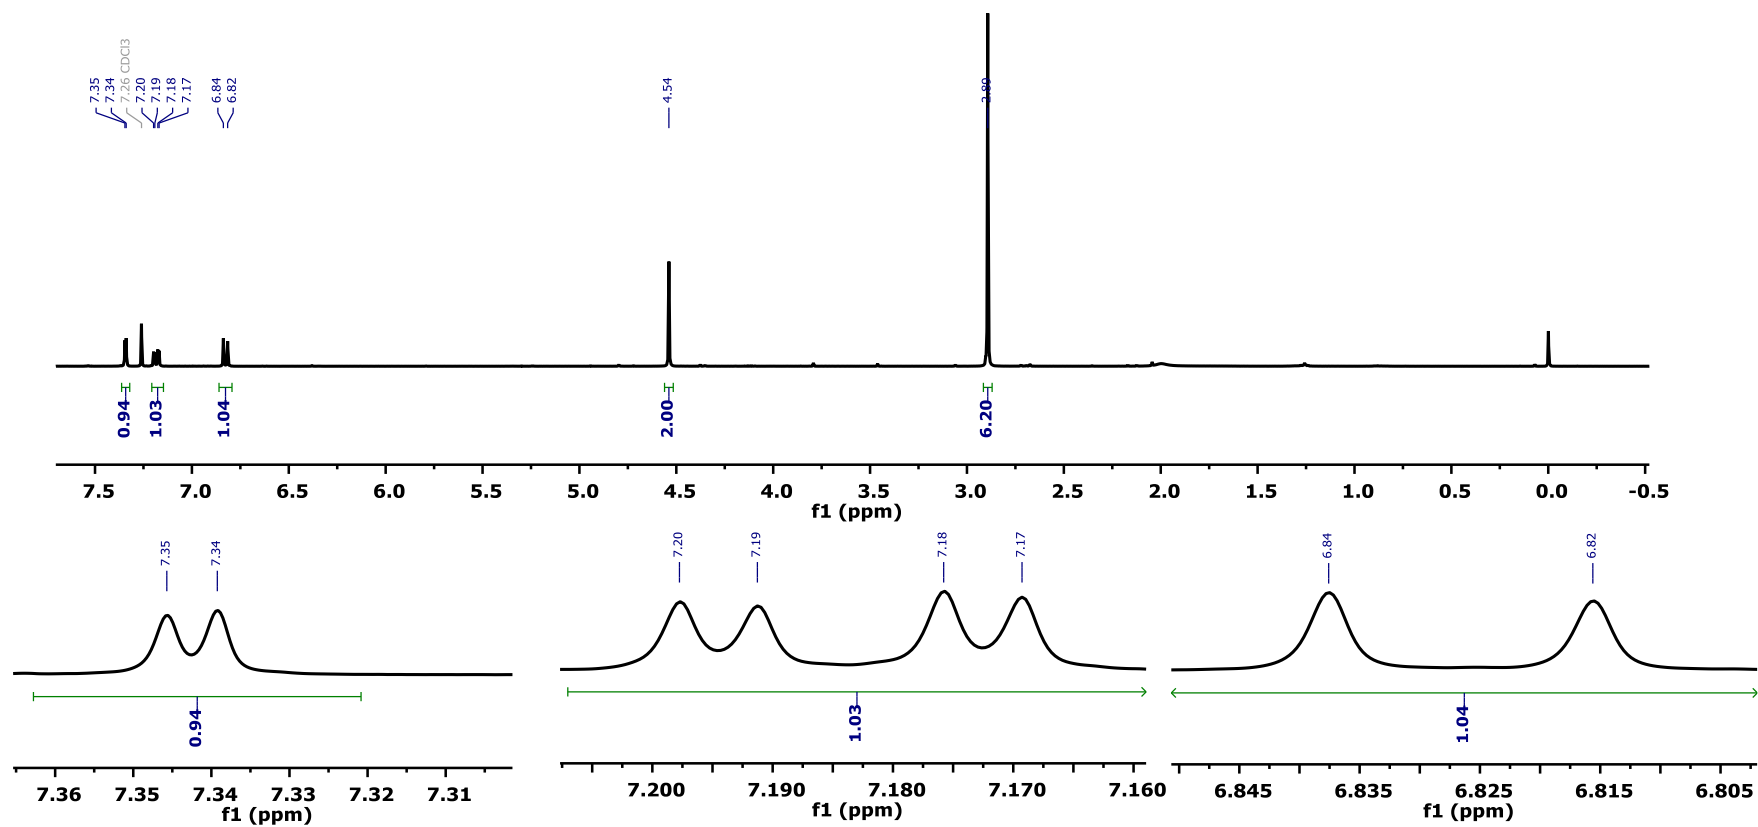

$^{13}\text{C}\{\text{H}\}$  NMR ( $\text{CDCl}_3$ , 101 MHz)

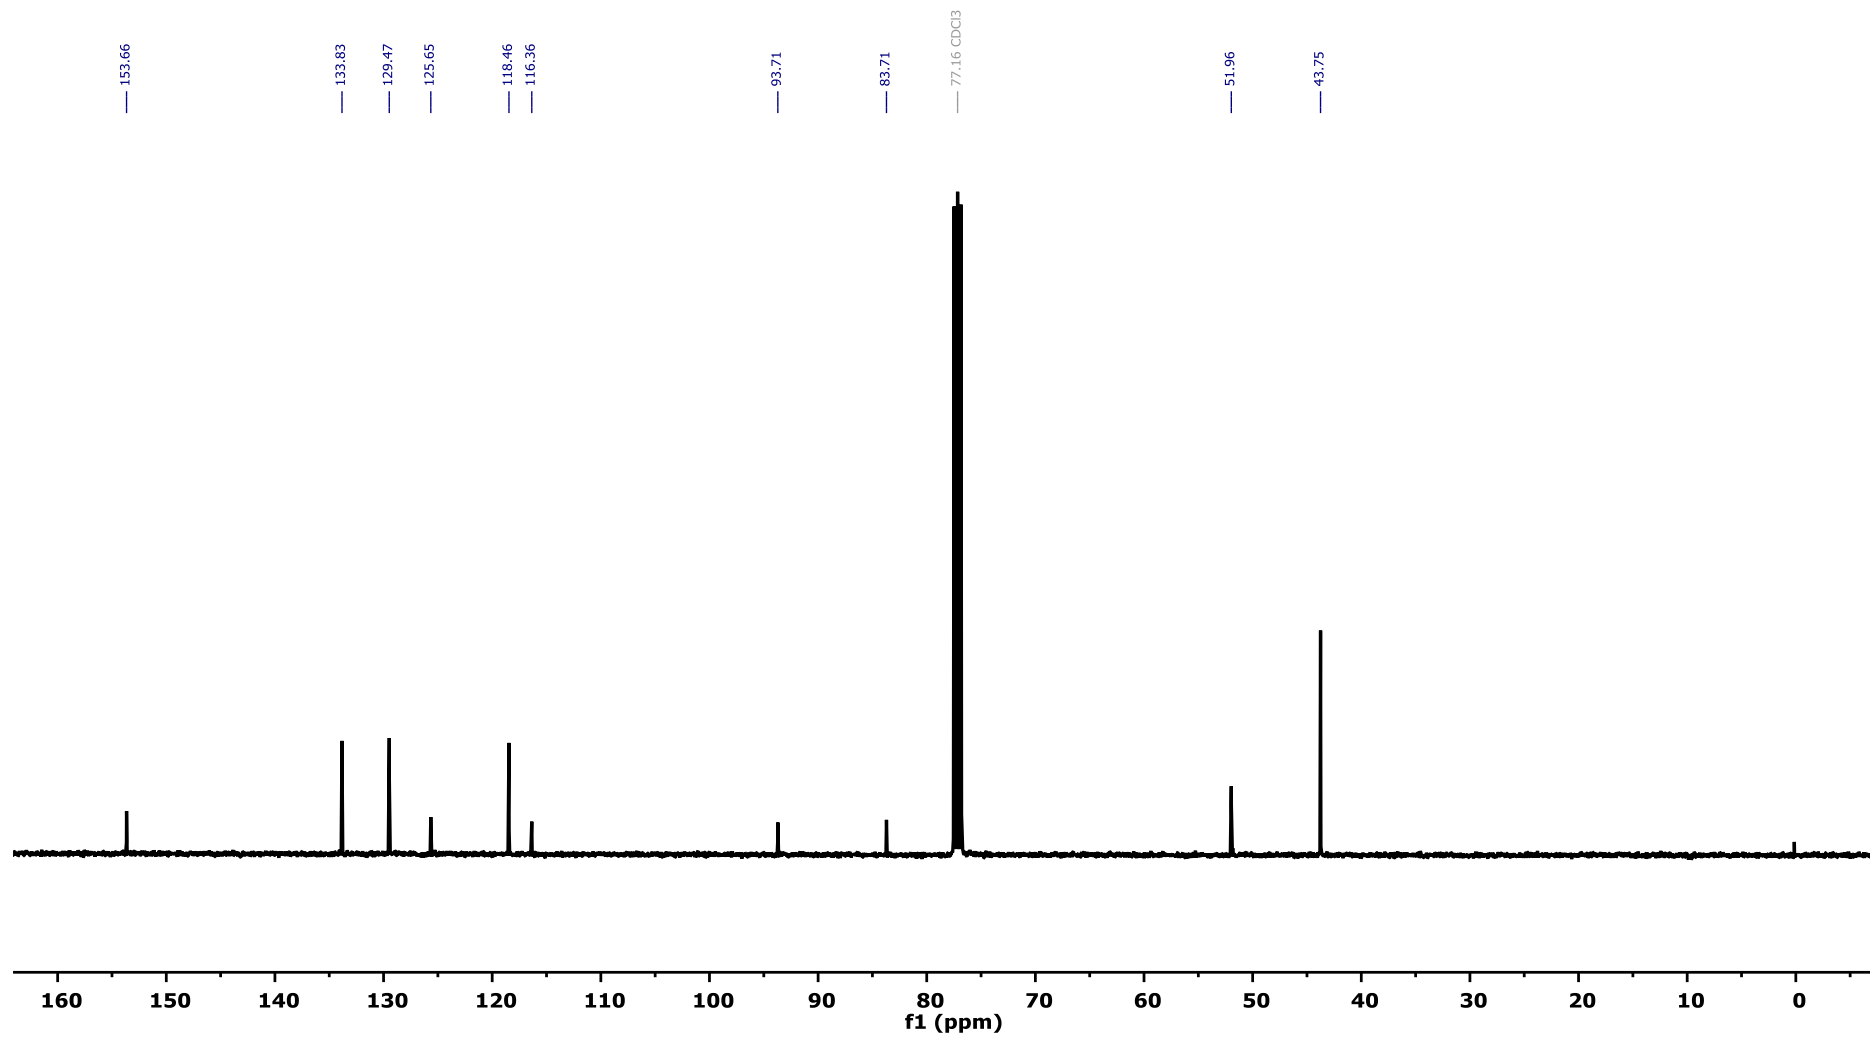

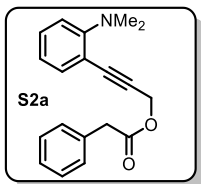

<sup>1</sup>H NMR (400 MHz, CDCl<sub>3</sub>)

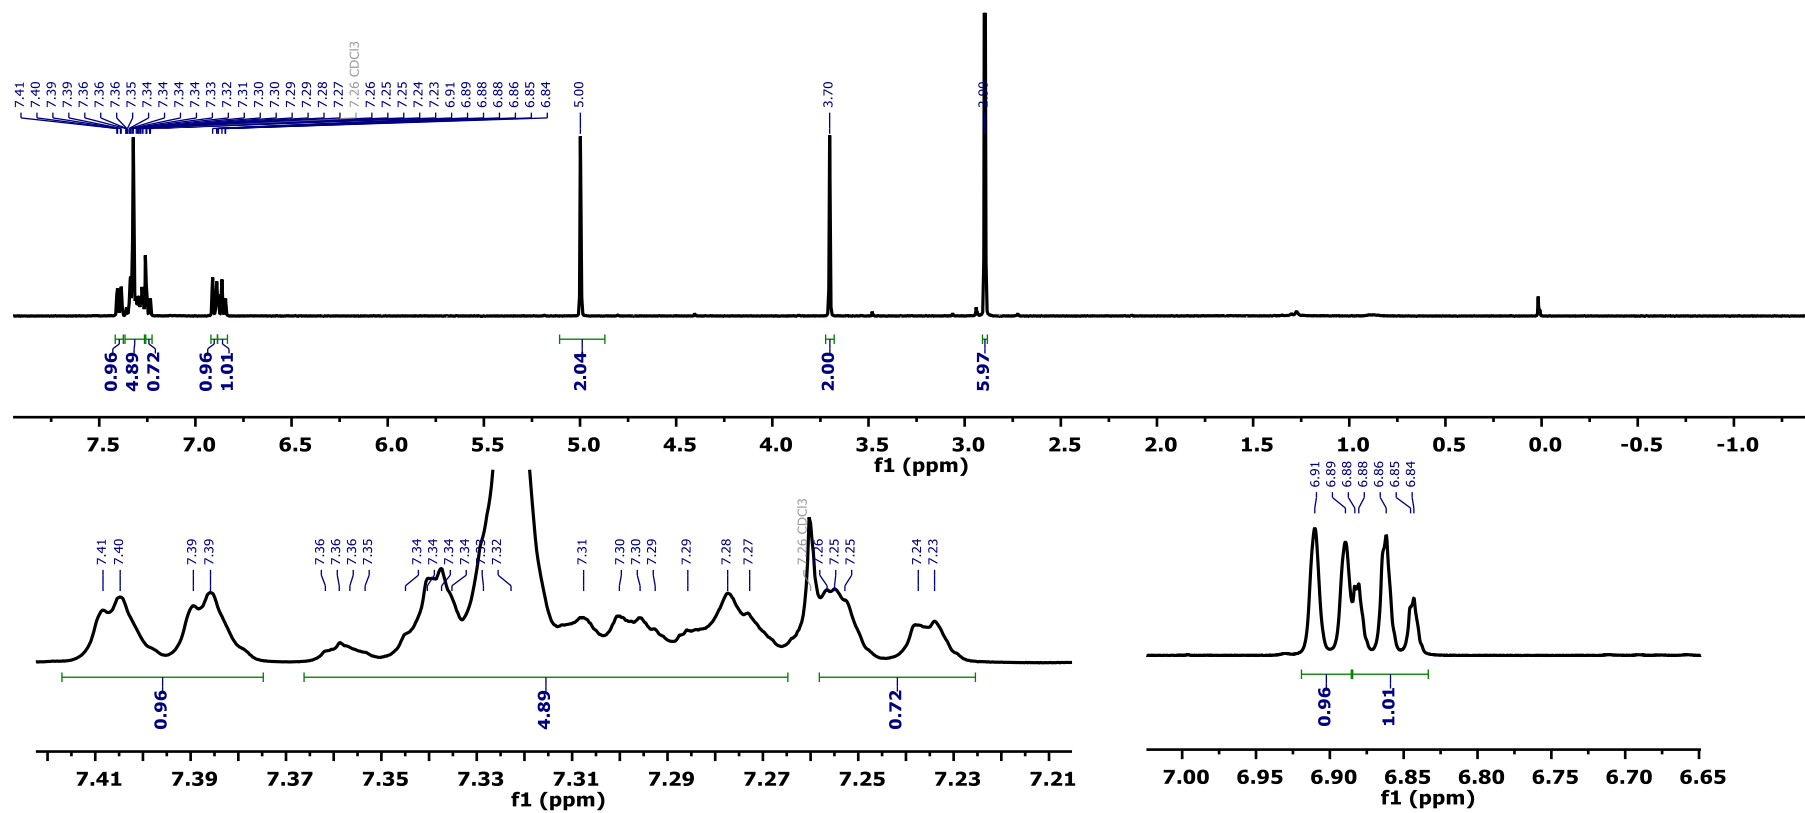

$^{13}\text{C}\{\text{H}\}$  NMR ( $\text{CDCl}_3$ , 101 MHz)

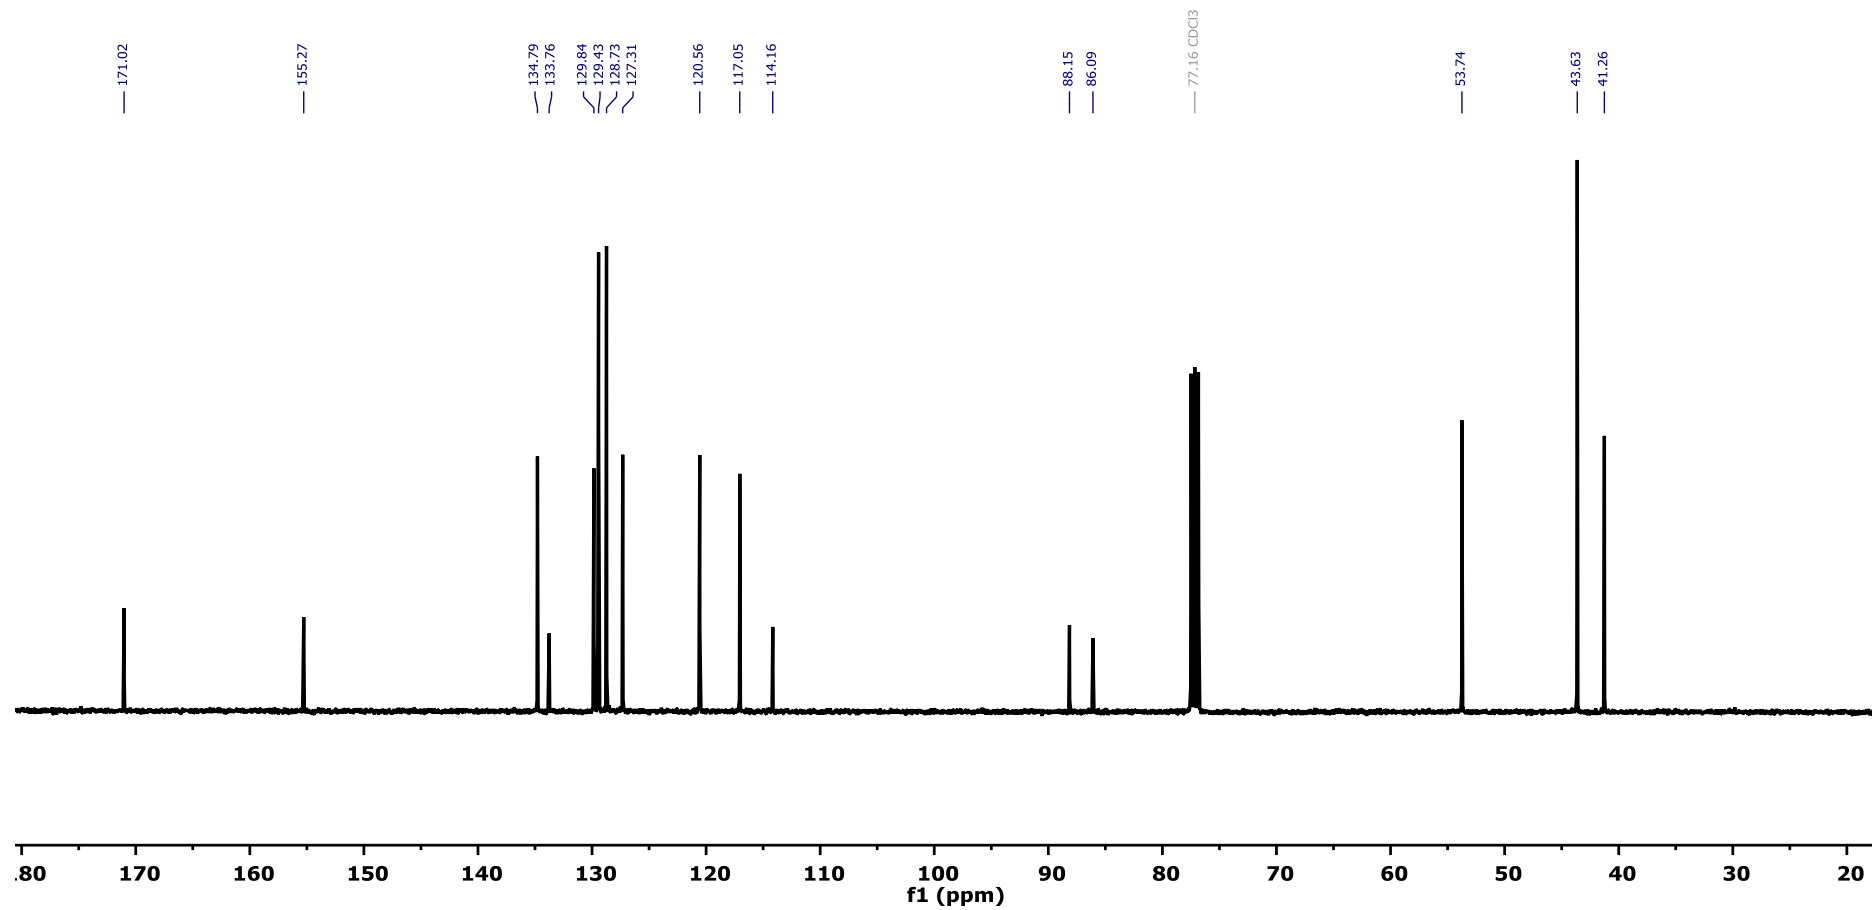

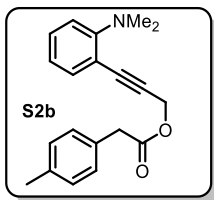

<sup>1</sup>H NMR (400 MHz, CDCl<sub>3</sub>)

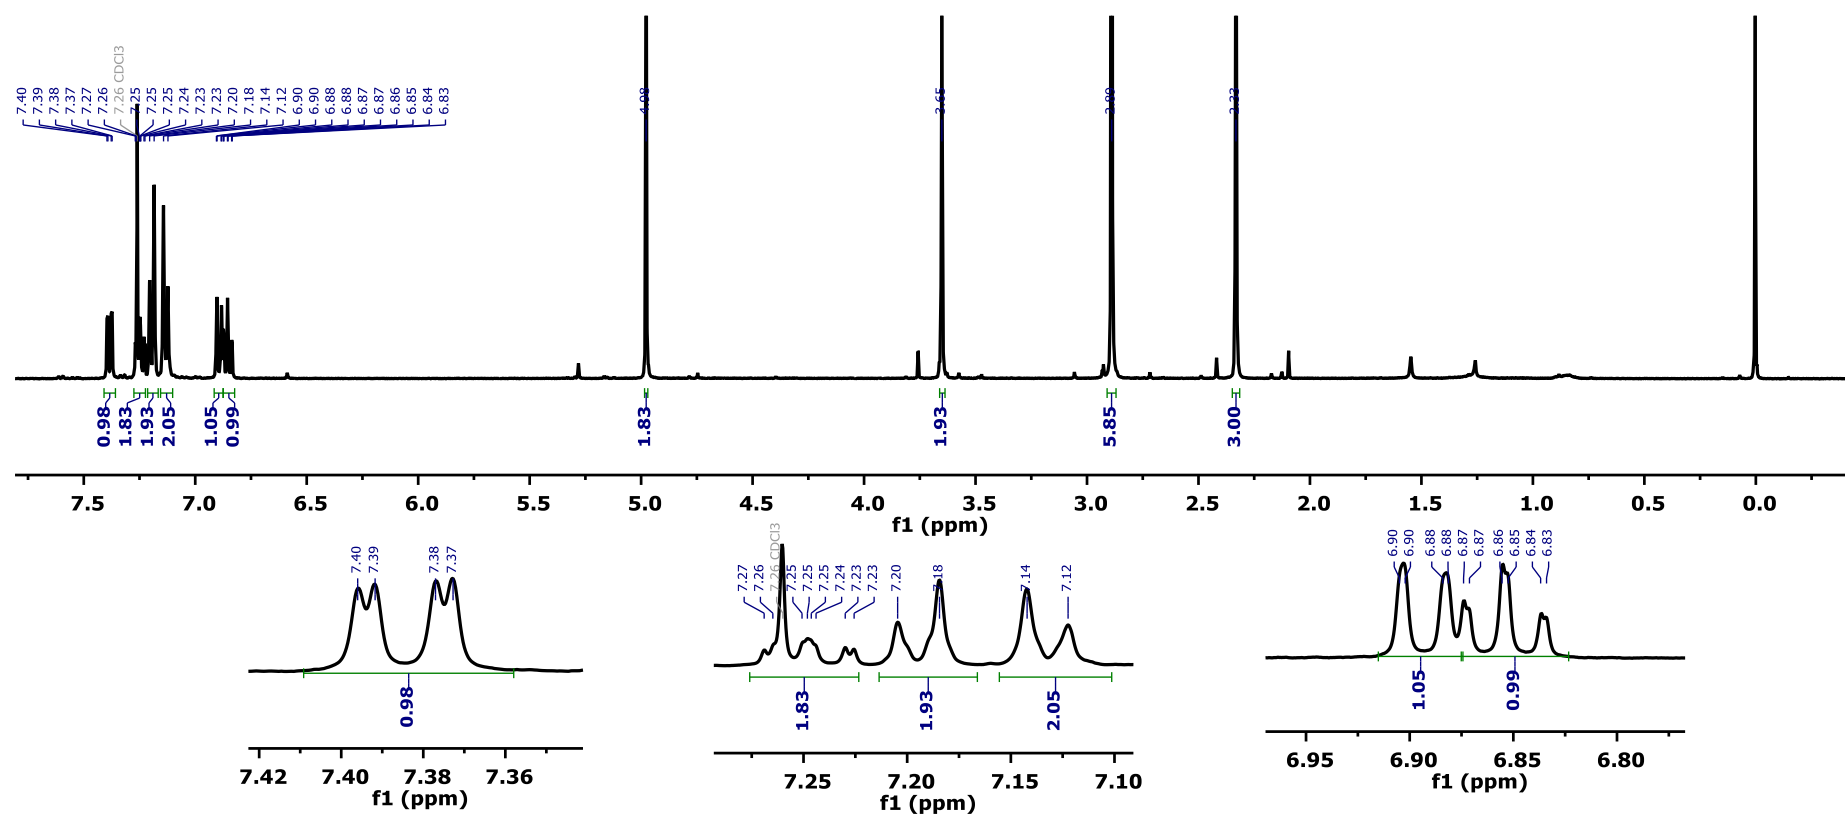

$^{13}\text{C}\{\text{H}\}$  NMR ( $\text{CDCl}_3$ , 101 MHz)

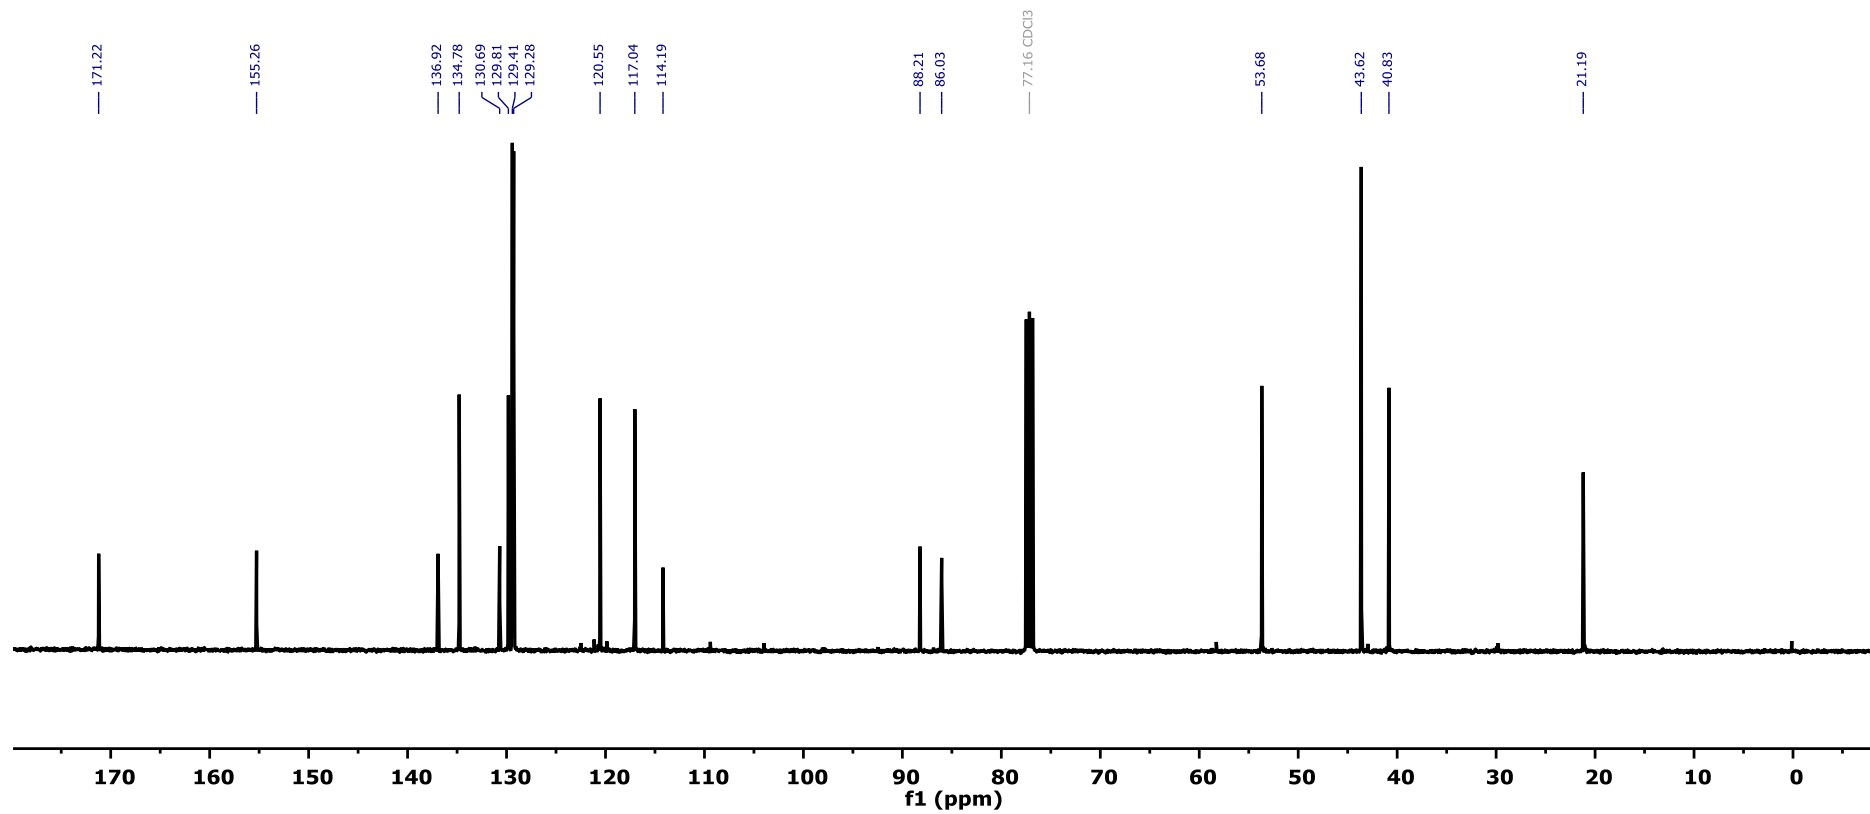

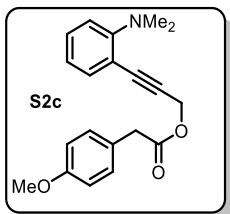

<sup>1</sup>H NMR (400 MHz, CDCl<sub>3</sub>)

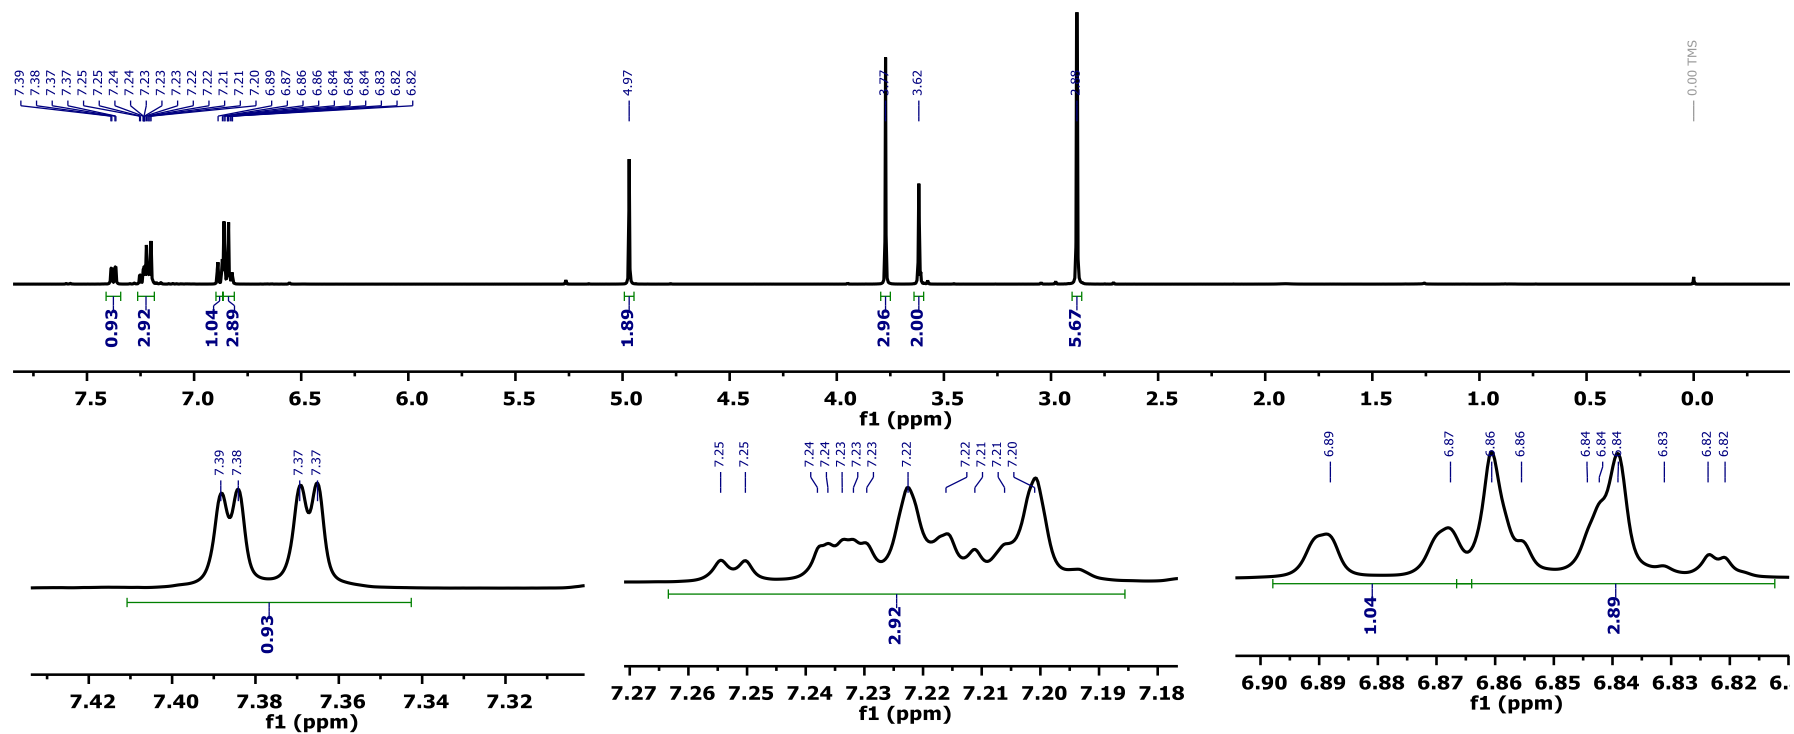



$^{13}\text{C}\{\text{H}\}$  NMR ( $\text{CDCl}_3$ , 101 MHz)

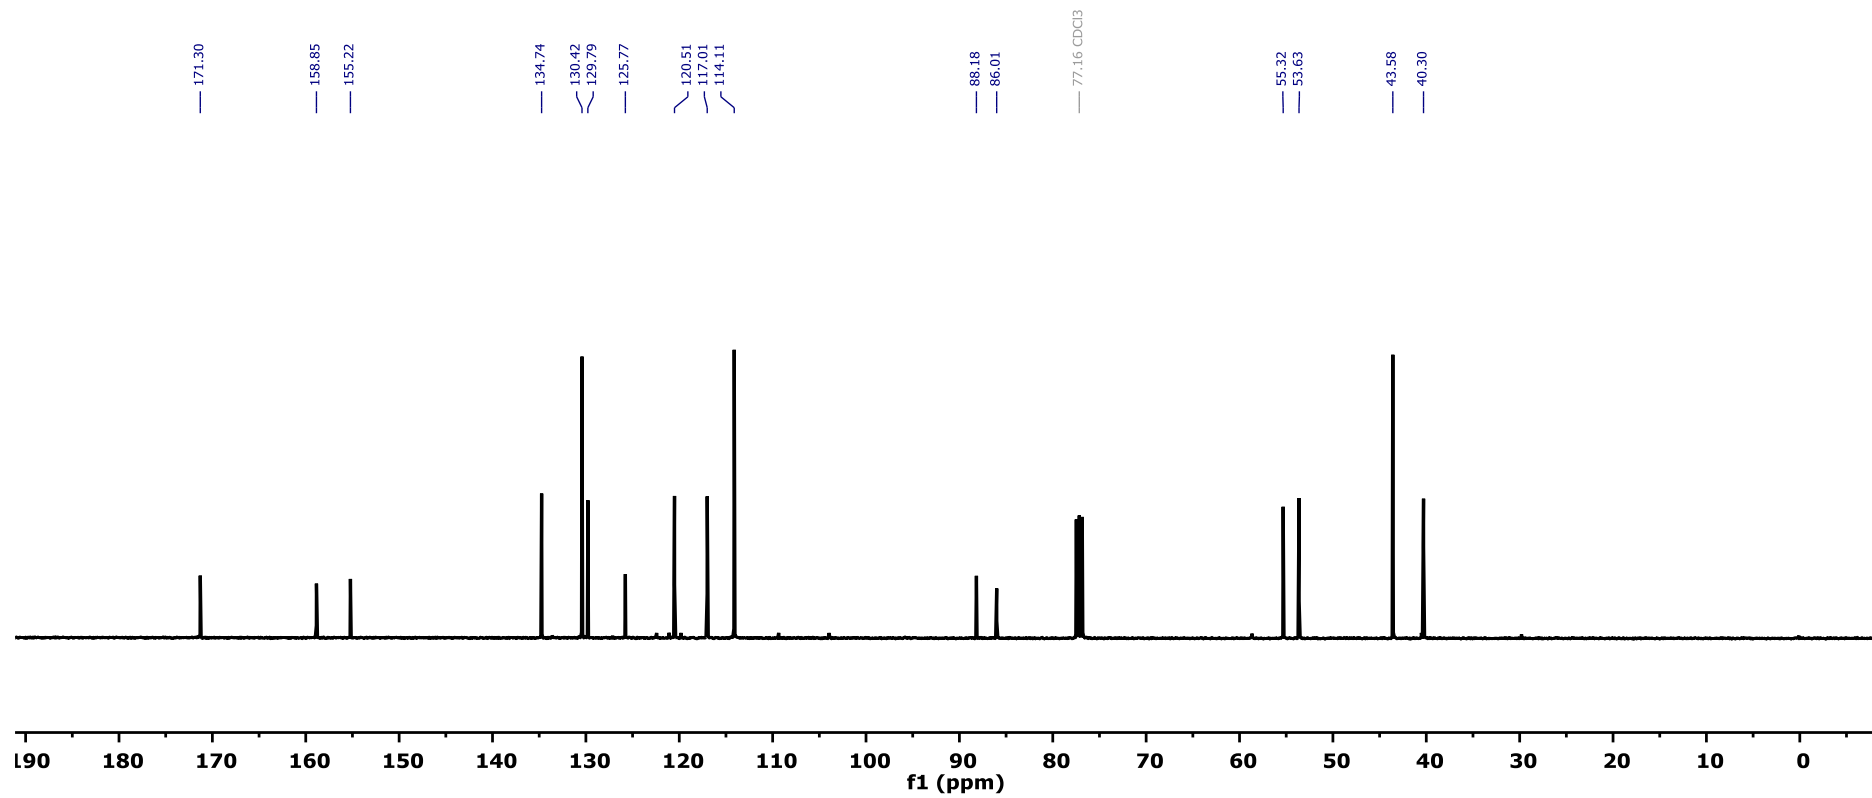

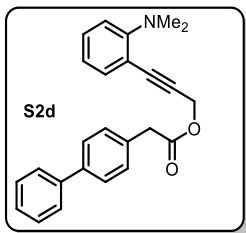

<sup>1</sup>H NMR (400 MHz, CDCl<sub>3</sub>)

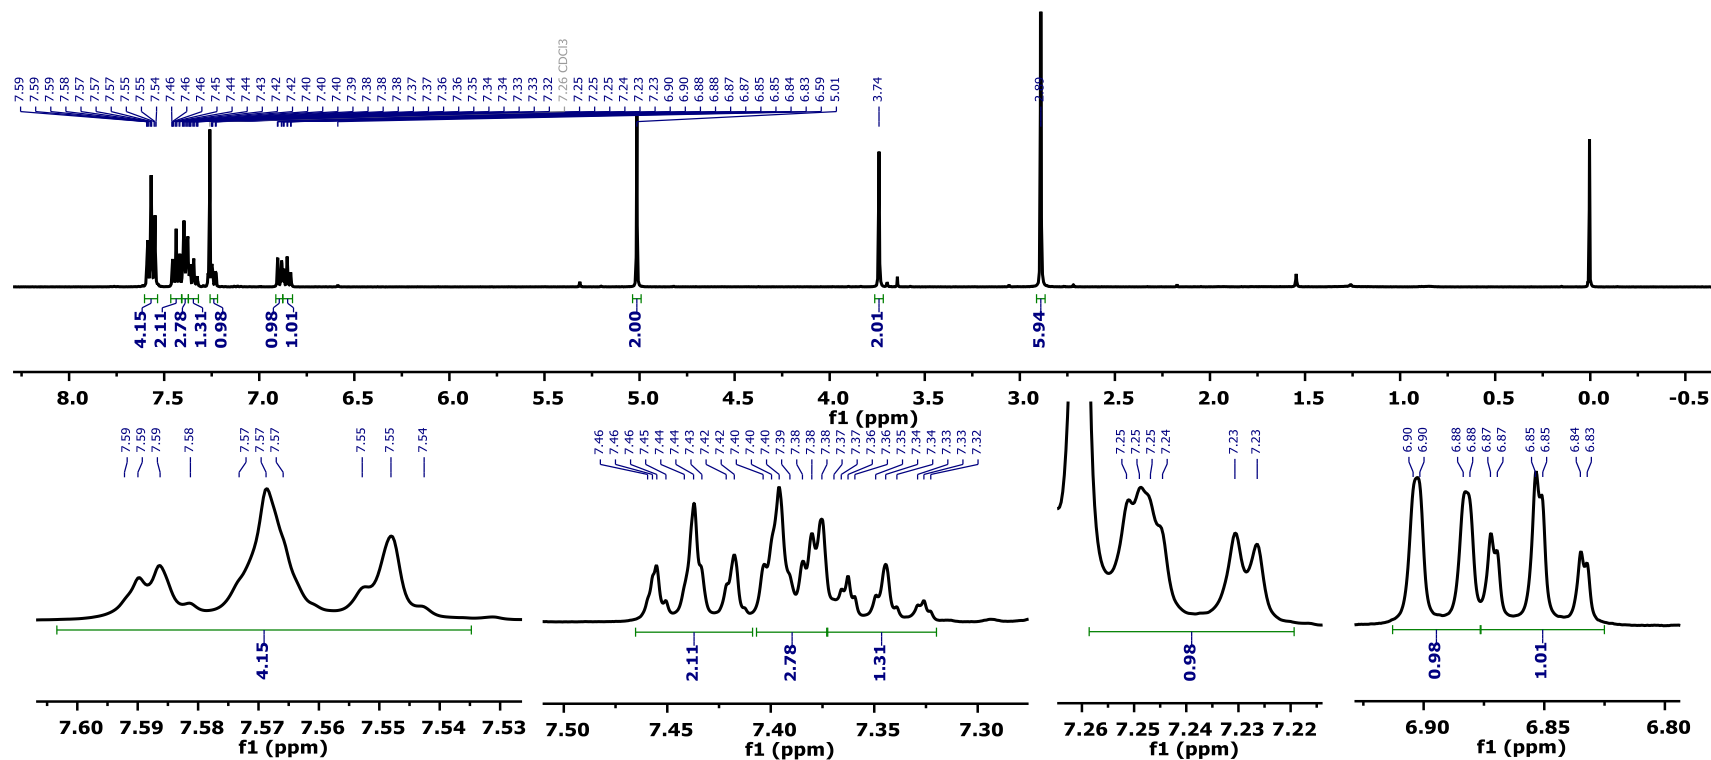

$^{13}\text{C}\{\text{H}\}$  NMR ( $\text{CDCl}_3$ , 101 MHz)

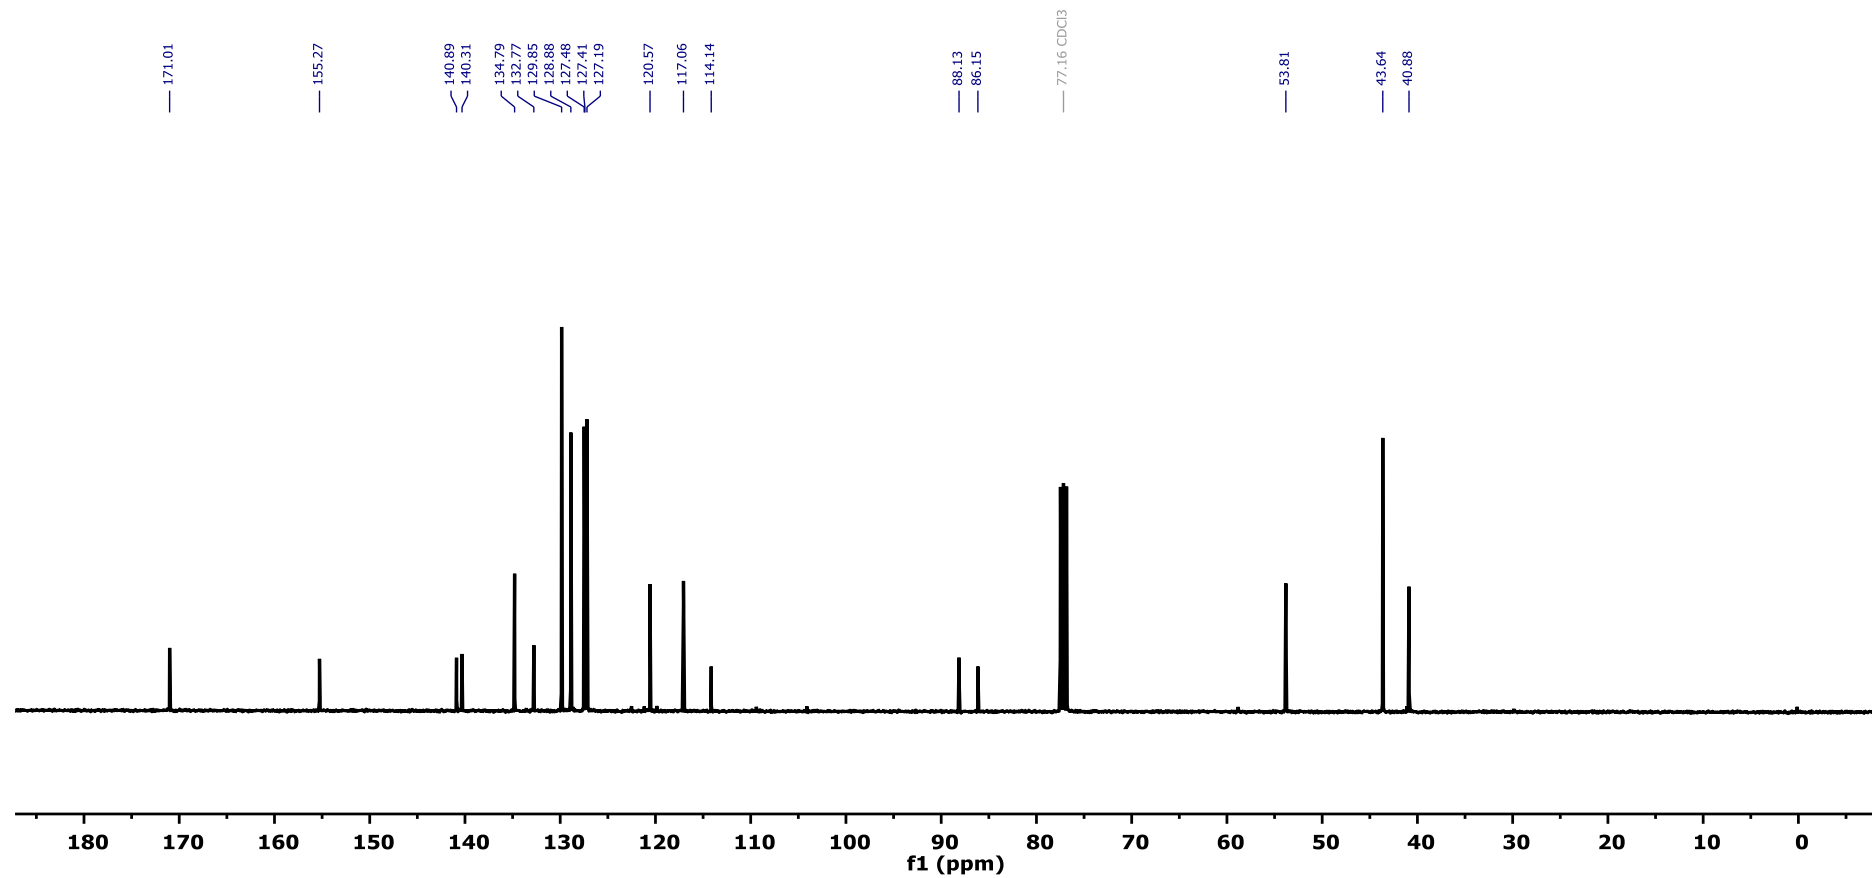

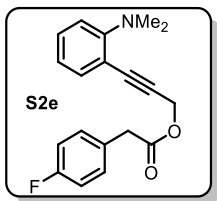

$^1\text{H}$  NMR (400 MHz,  $\text{CDCl}_3$ )

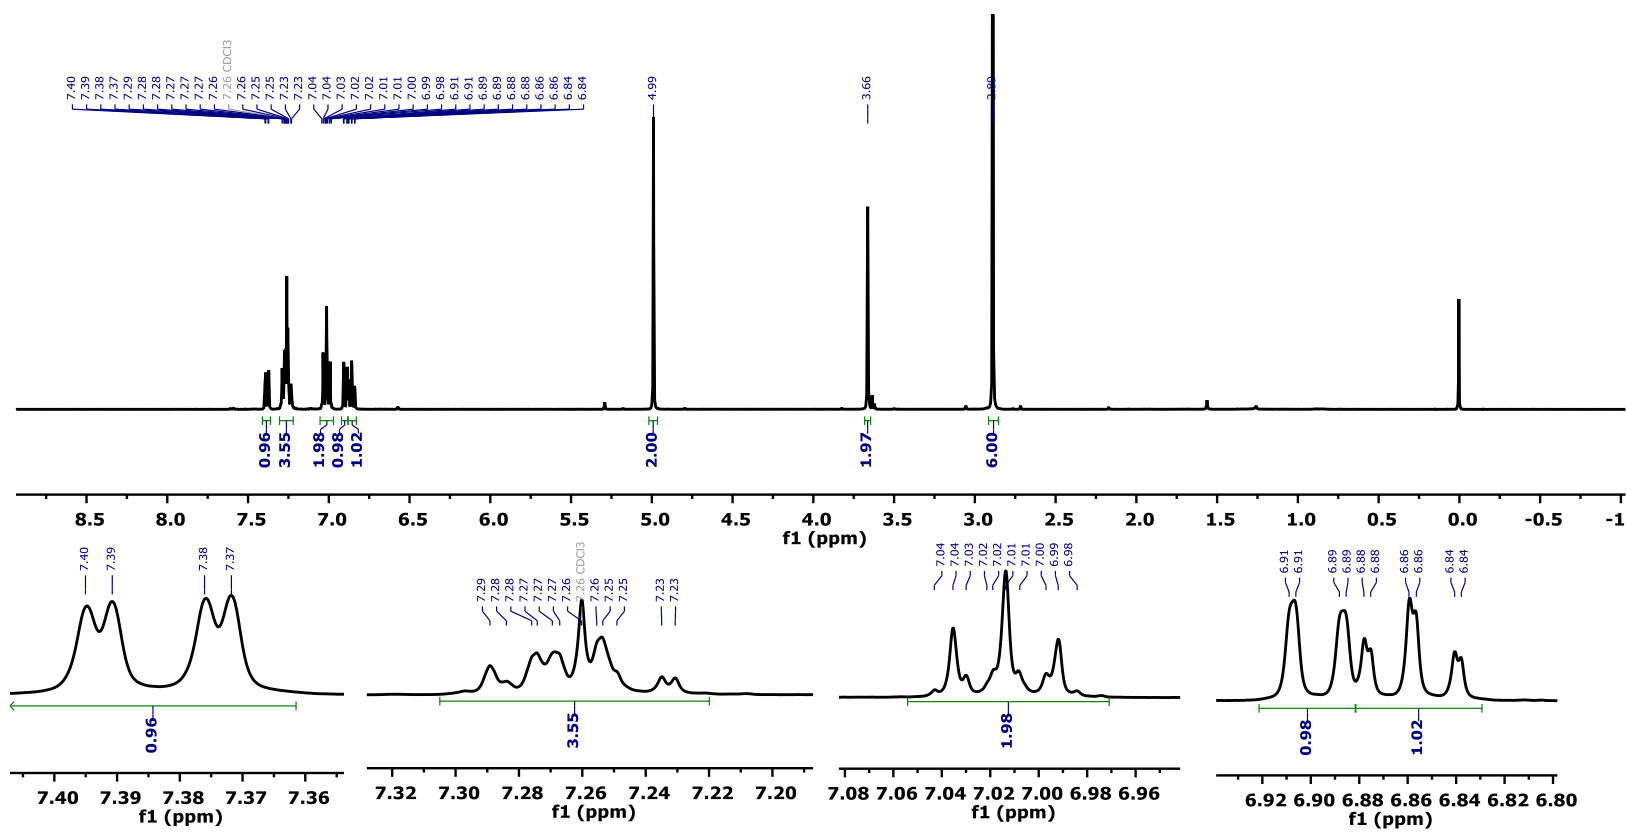

<sup>13</sup>C{H} NMR (CDCl<sub>3</sub>, 101 MHz)

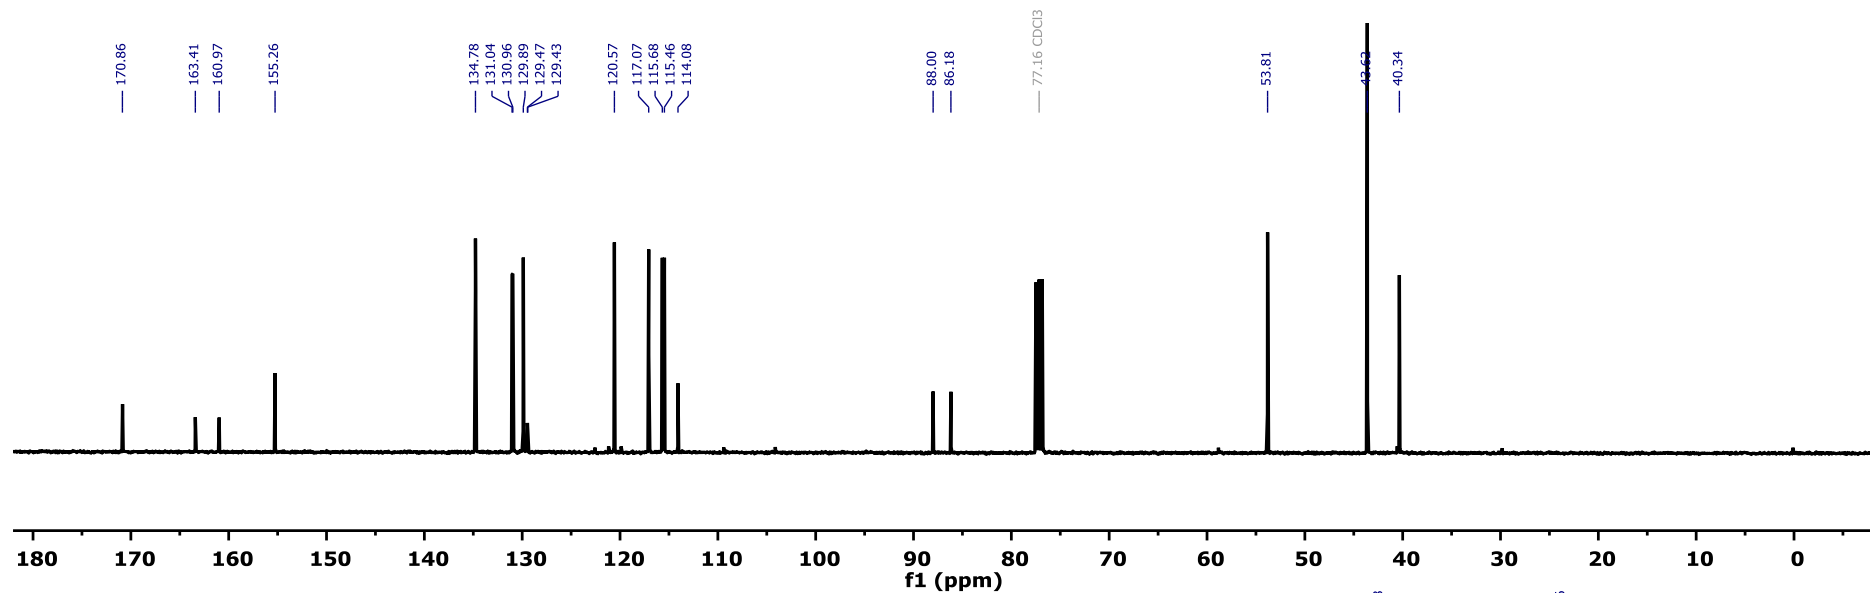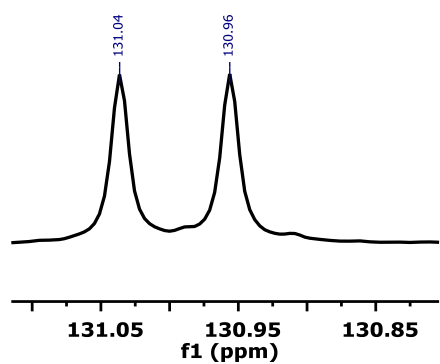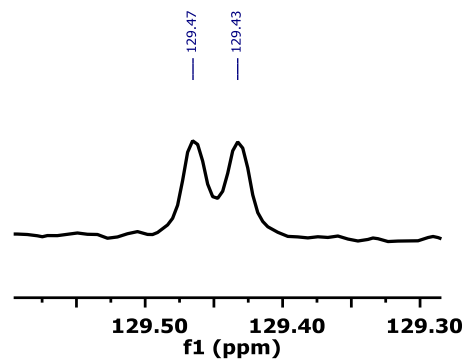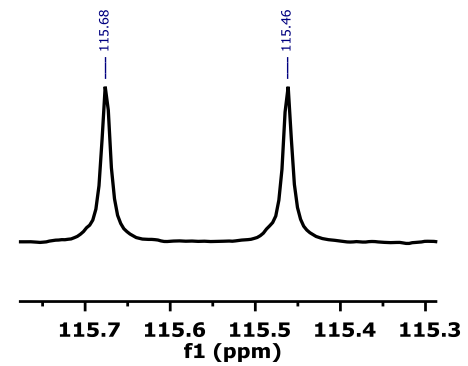

$^{19}\text{F}$  NMR ( $\text{CDCl}_3$ , 376 MHz):

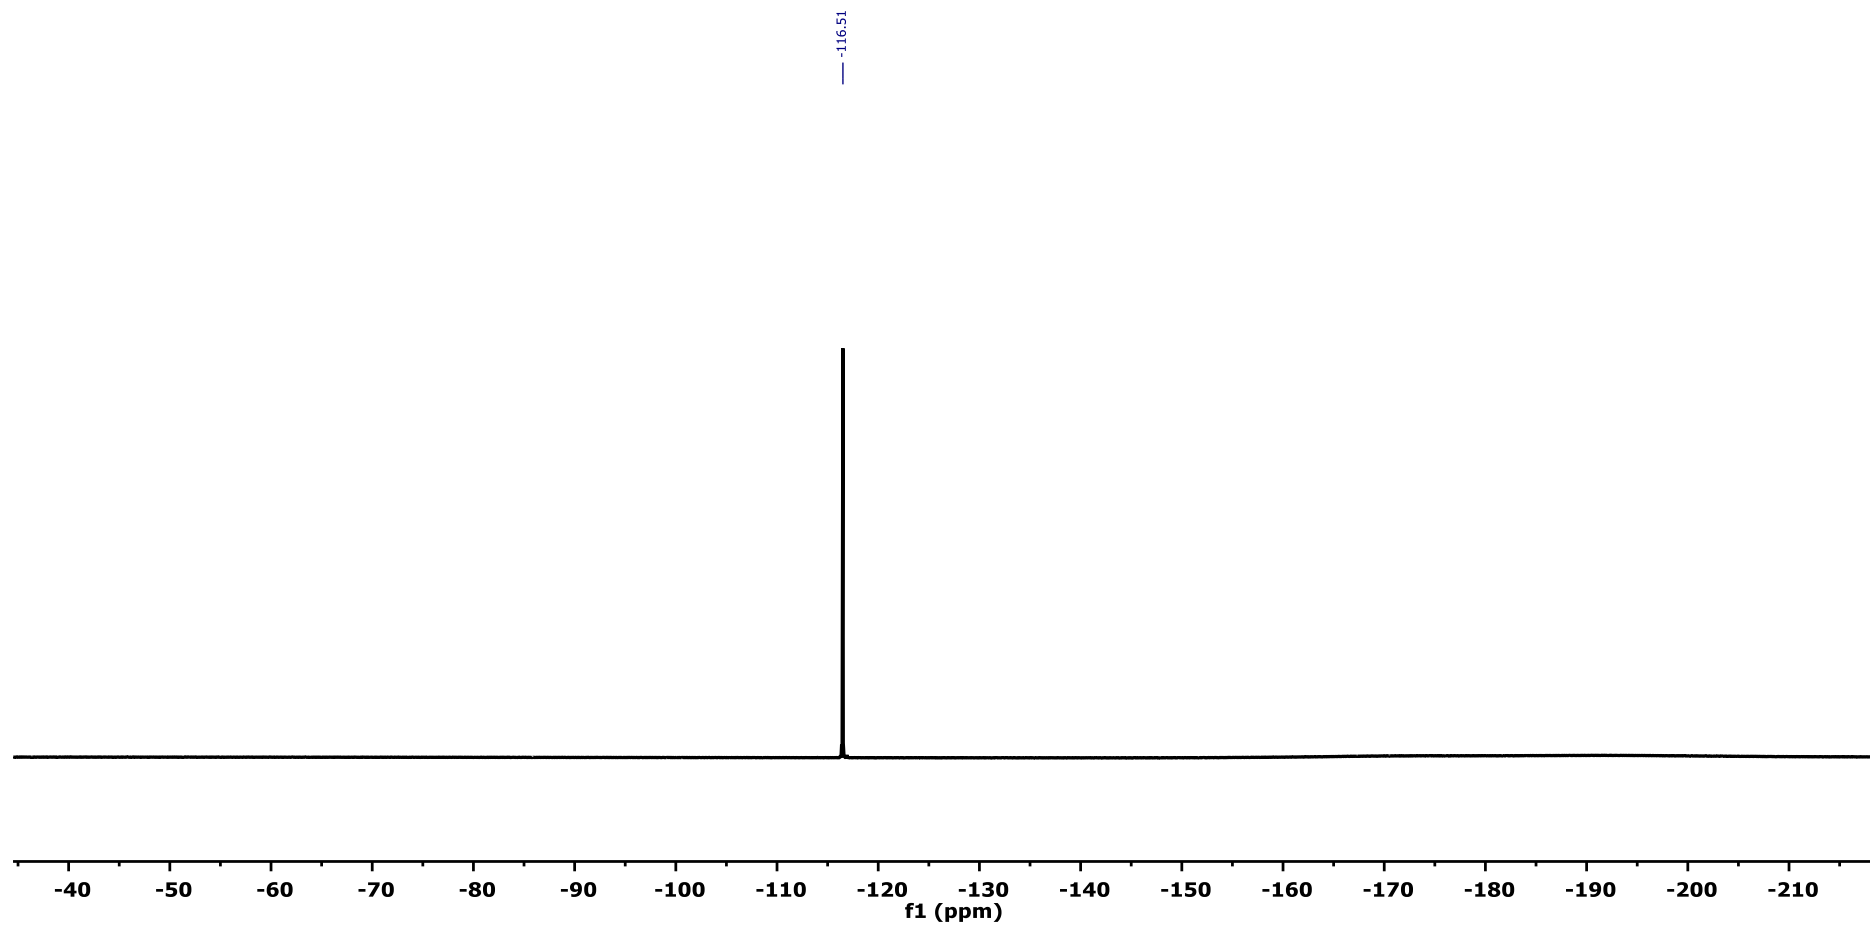

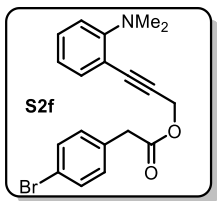

$^1\text{H}$  NMR (400 MHz,  $\text{CDCl}_3$ )

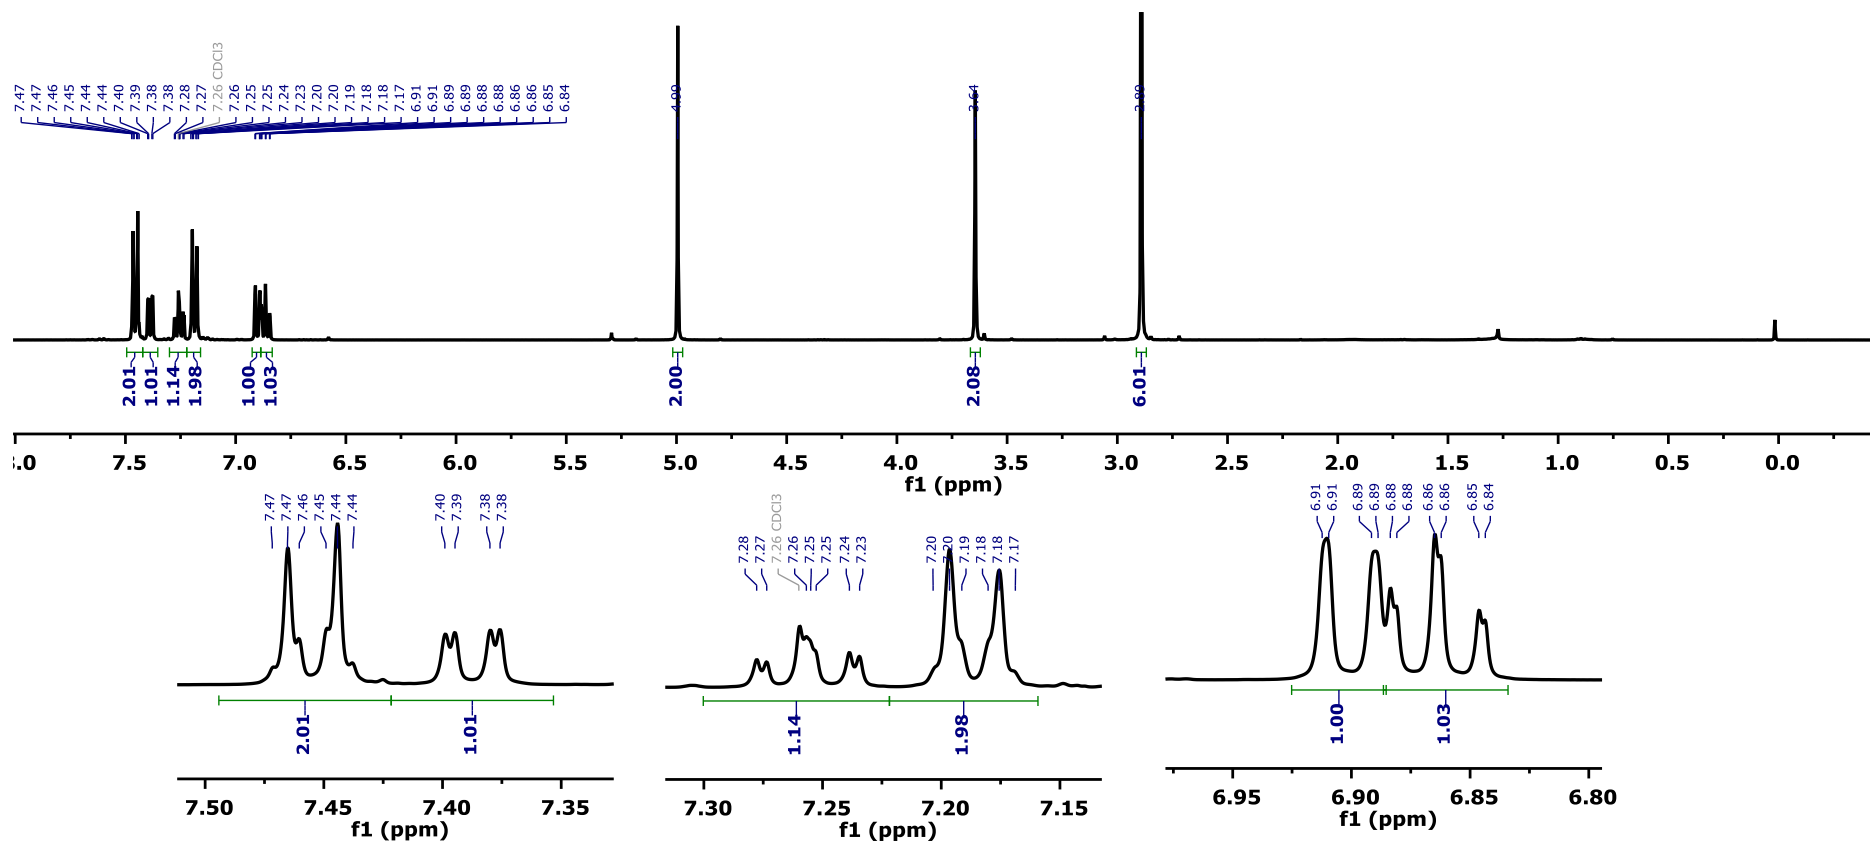

$^{13}\text{C}\{\text{H}\}$  NMR ( $\text{CDCl}_3$ , 101 MHz)

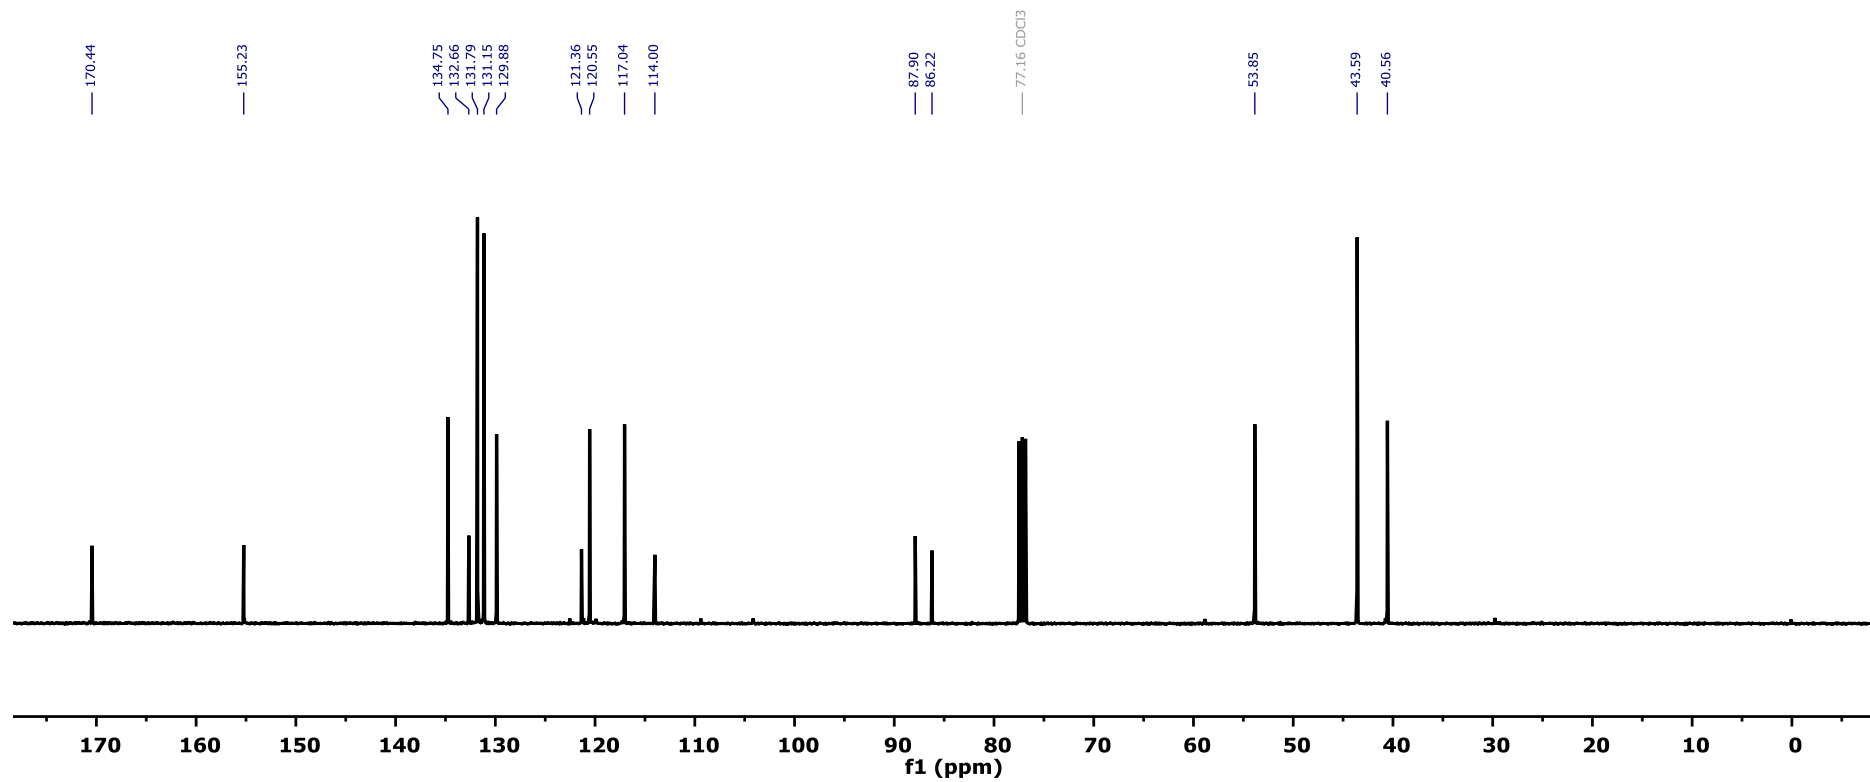



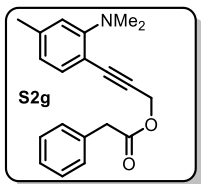

<sup>1</sup>H NMR (400 MHz, CDCl<sub>3</sub>)

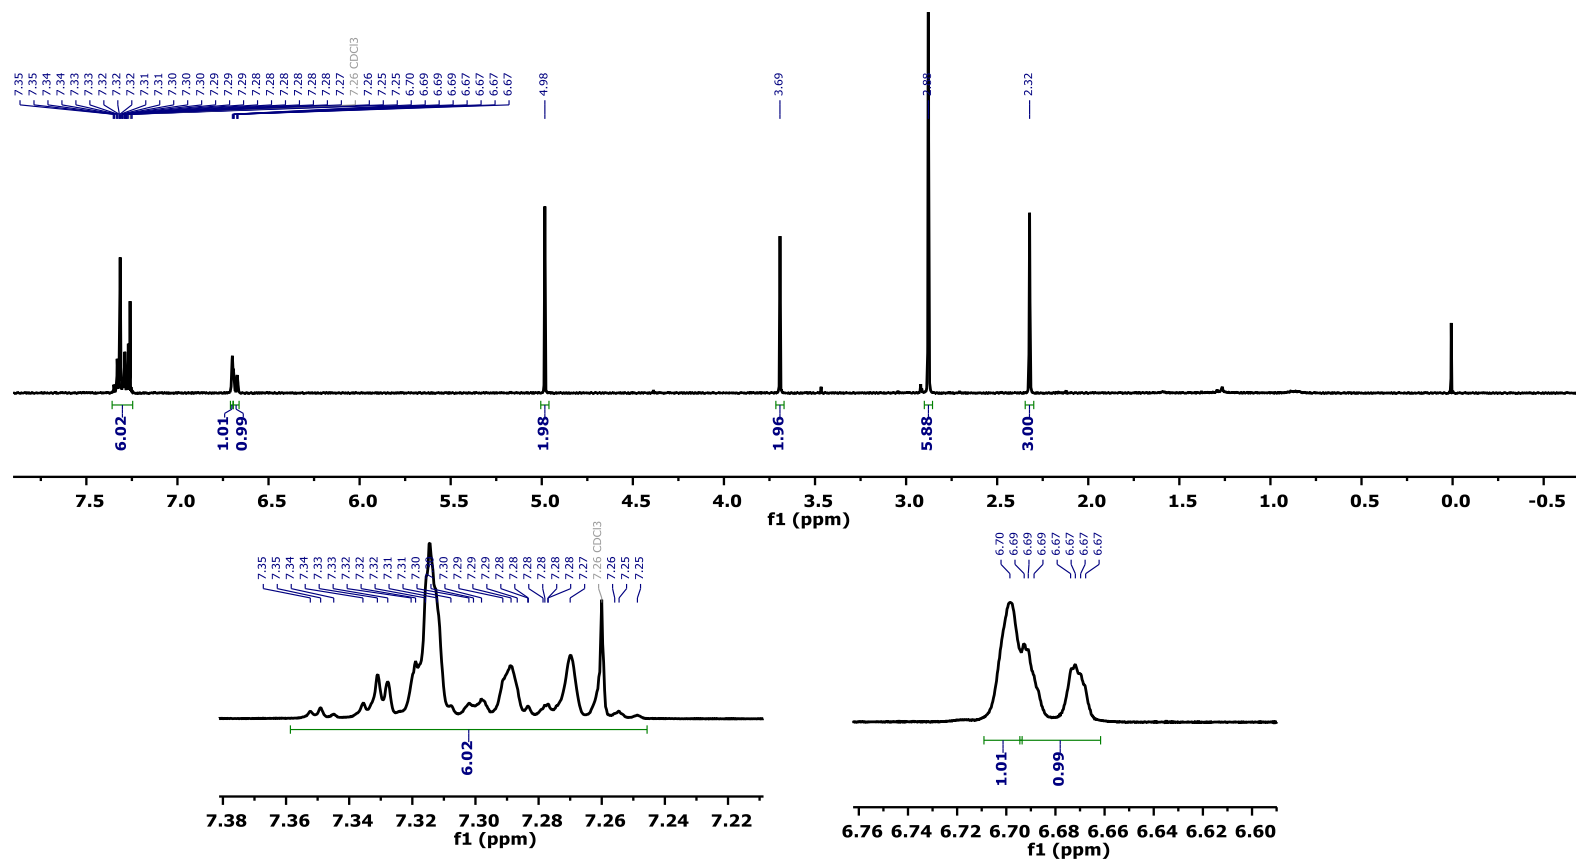

$^{13}\text{C}\{\text{H}\}$  NMR ( $\text{CDCl}_3$ , 101 MHz)

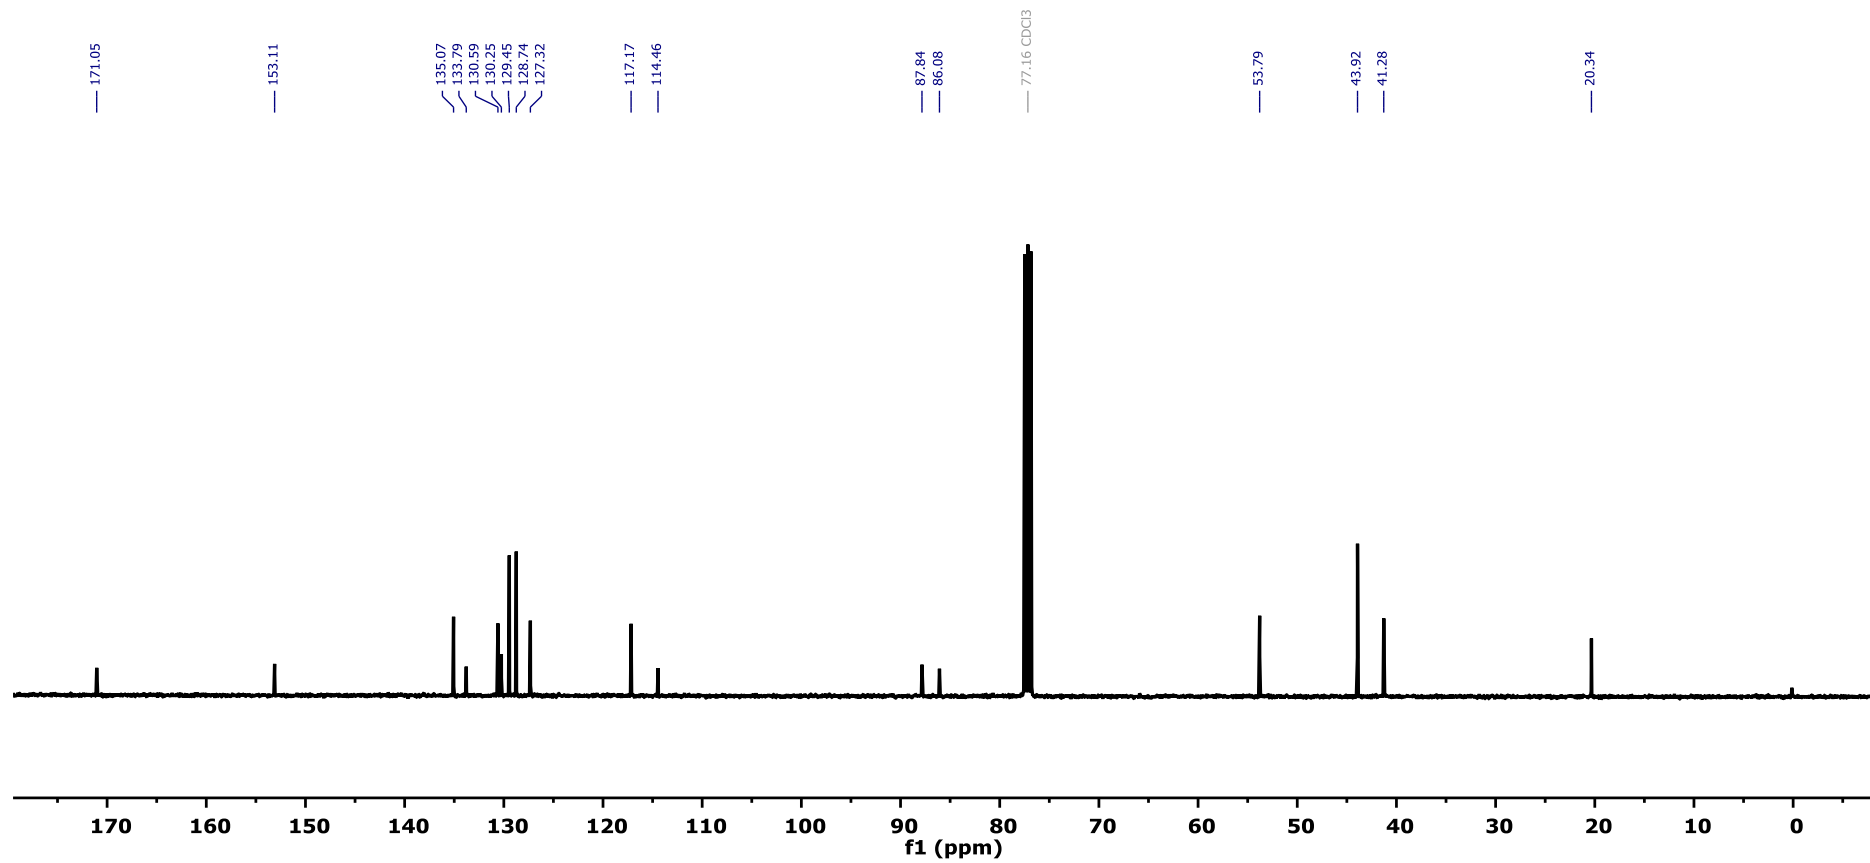

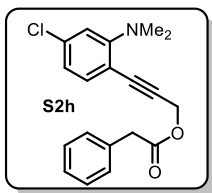

**<sup>1</sup>H NMR (400 MHz, CDCl<sub>3</sub>)**

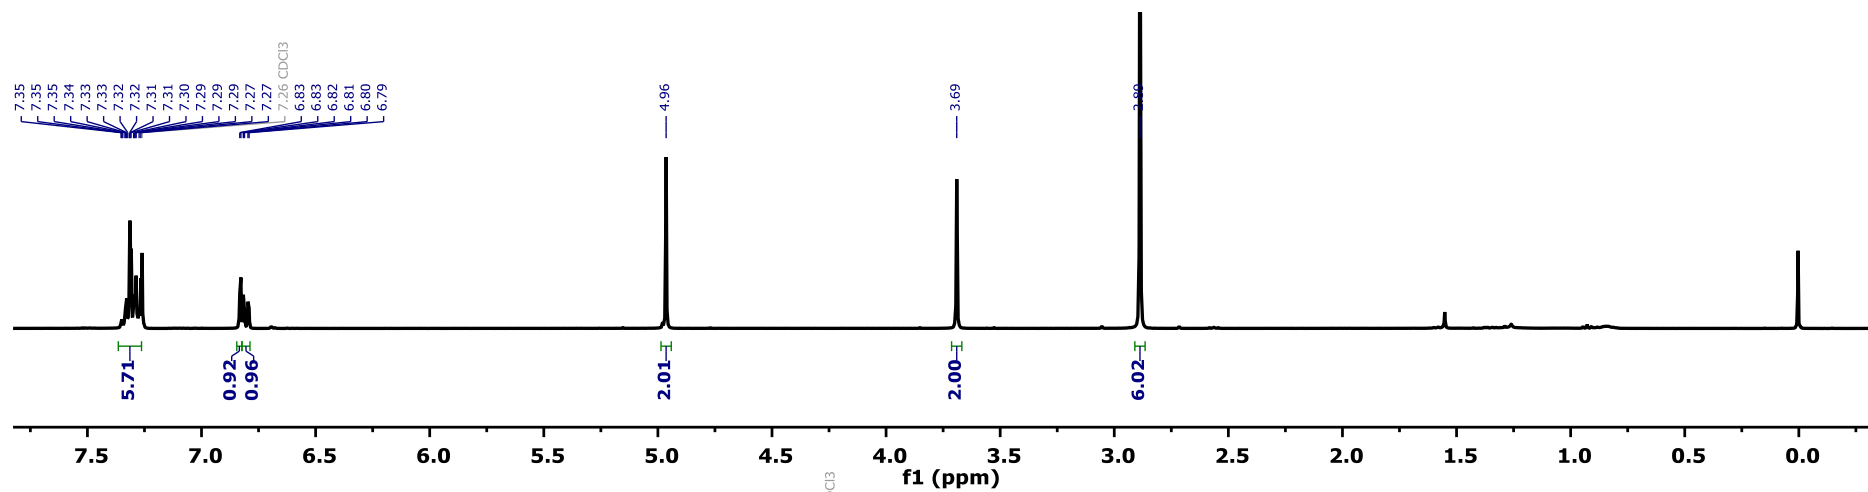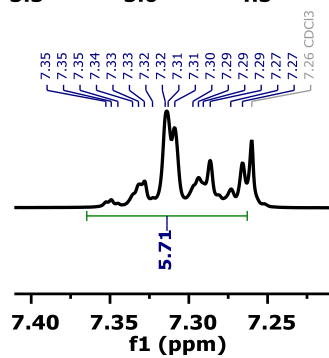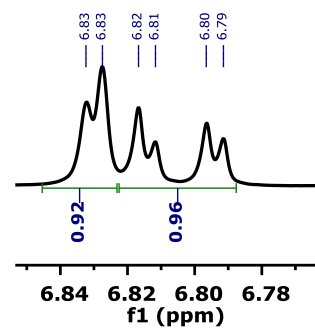

$^{13}\text{C}\{\text{H}\}$  NMR ( $\text{CDCl}_3$ , 101 MHz)

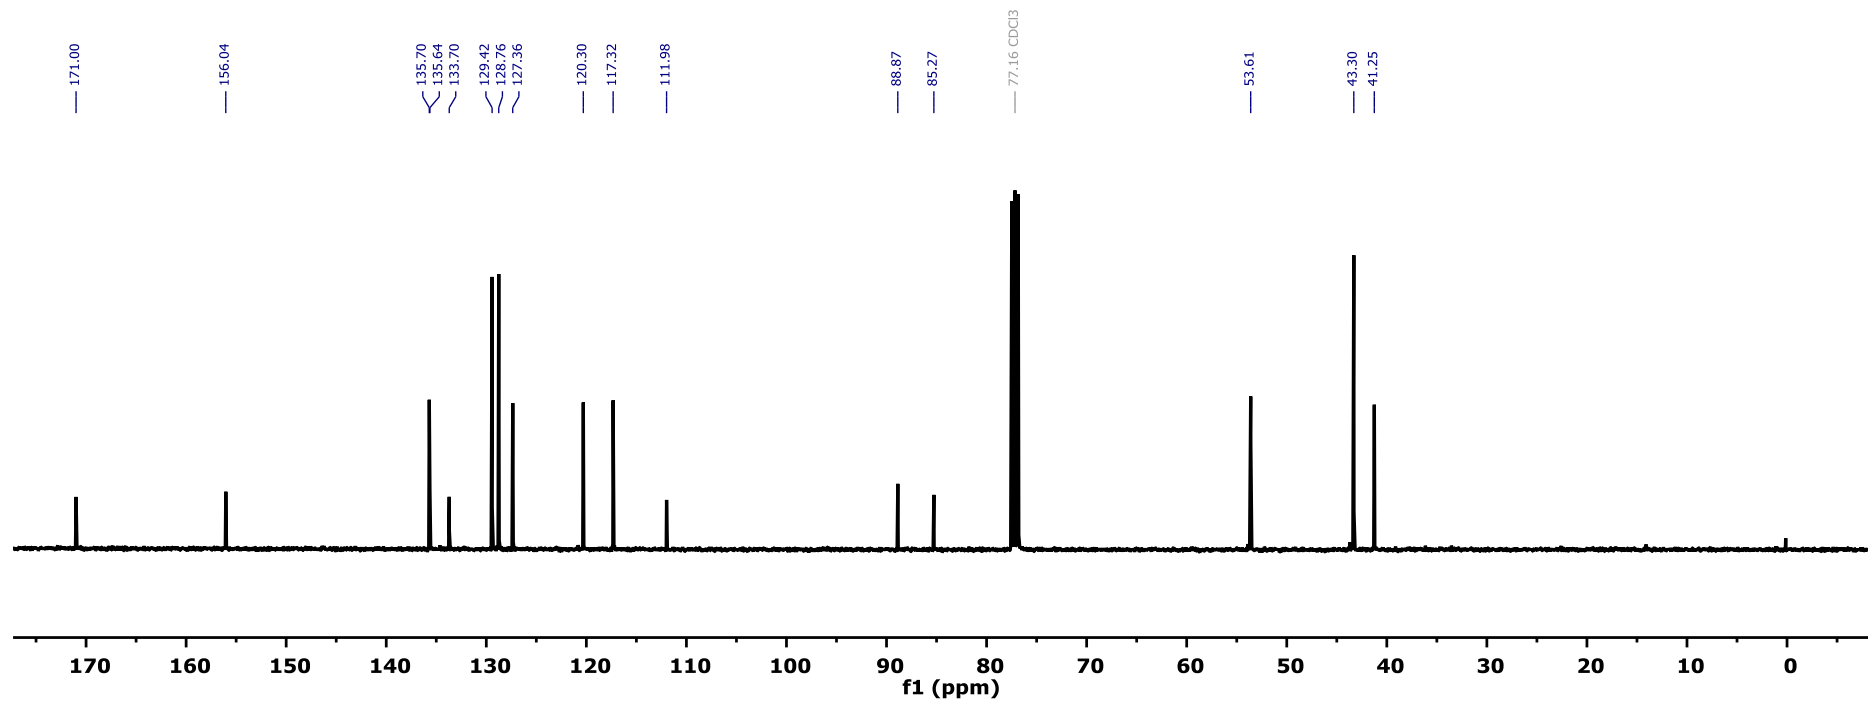

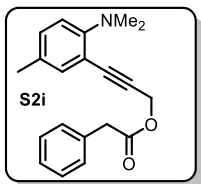

<sup>1</sup>H NMR (400 MHz, CDCl<sub>3</sub>)

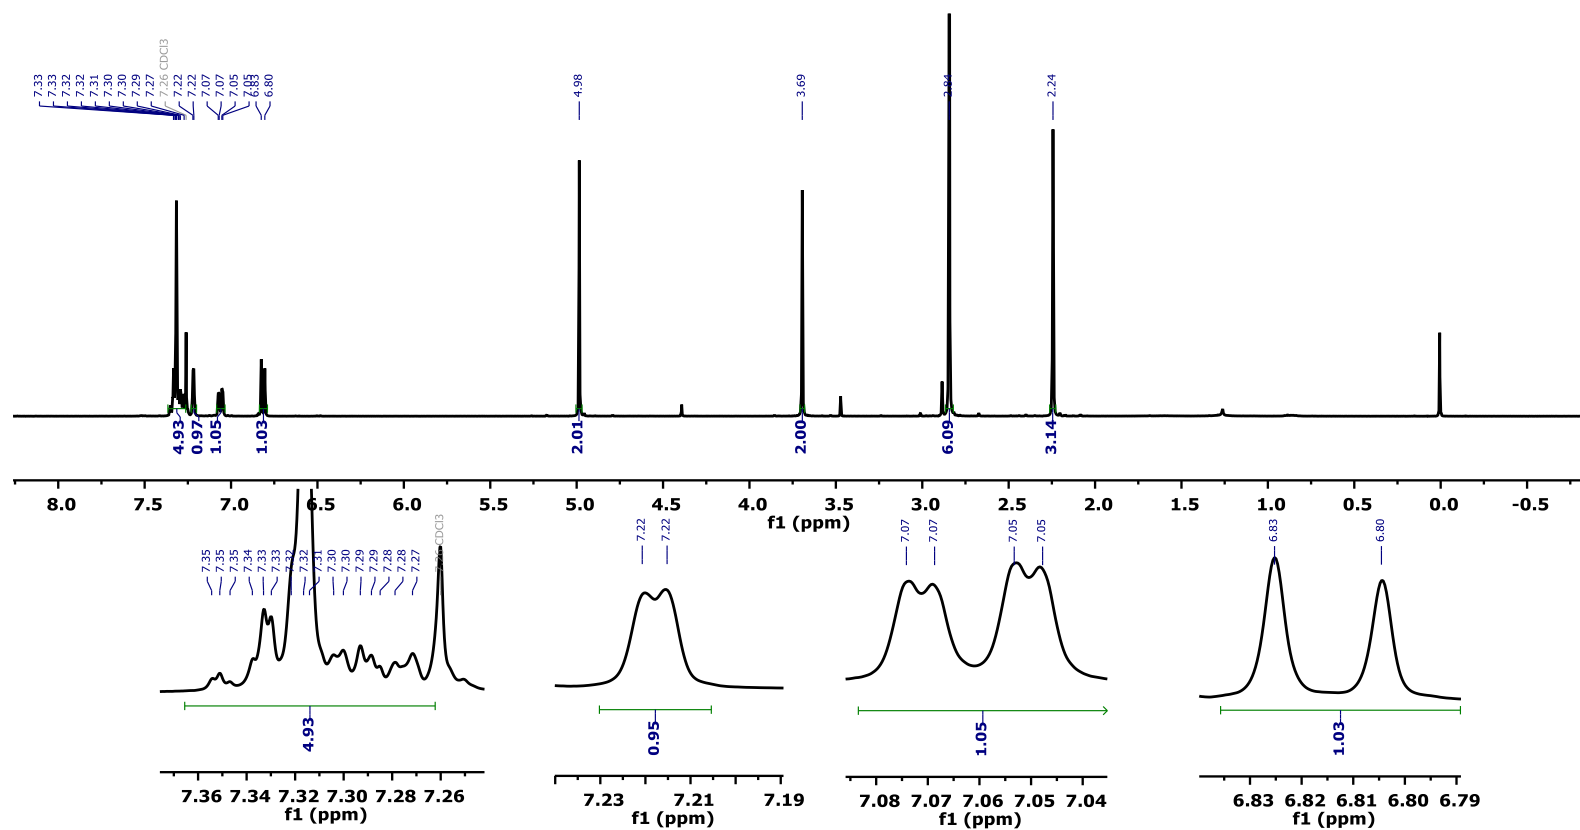

$^{13}\text{C}\{\text{H}\}$  NMR ( $\text{CDCl}_3$ , 101 MHz)

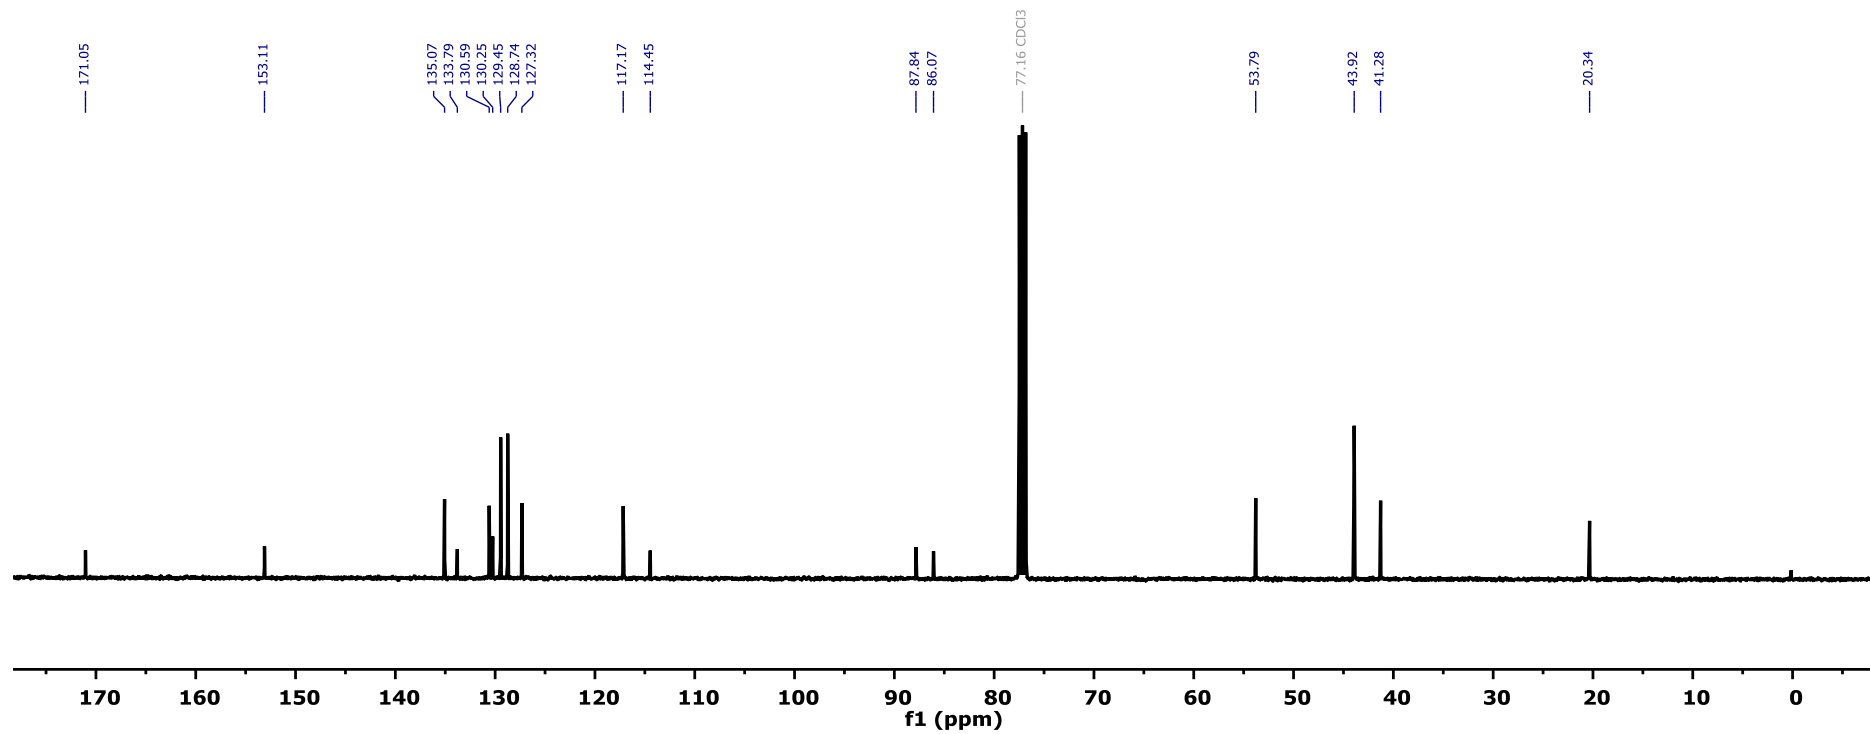

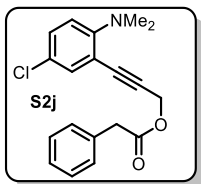

**<sup>1</sup>H NMR (400 MHz, CDCl<sub>3</sub>)**

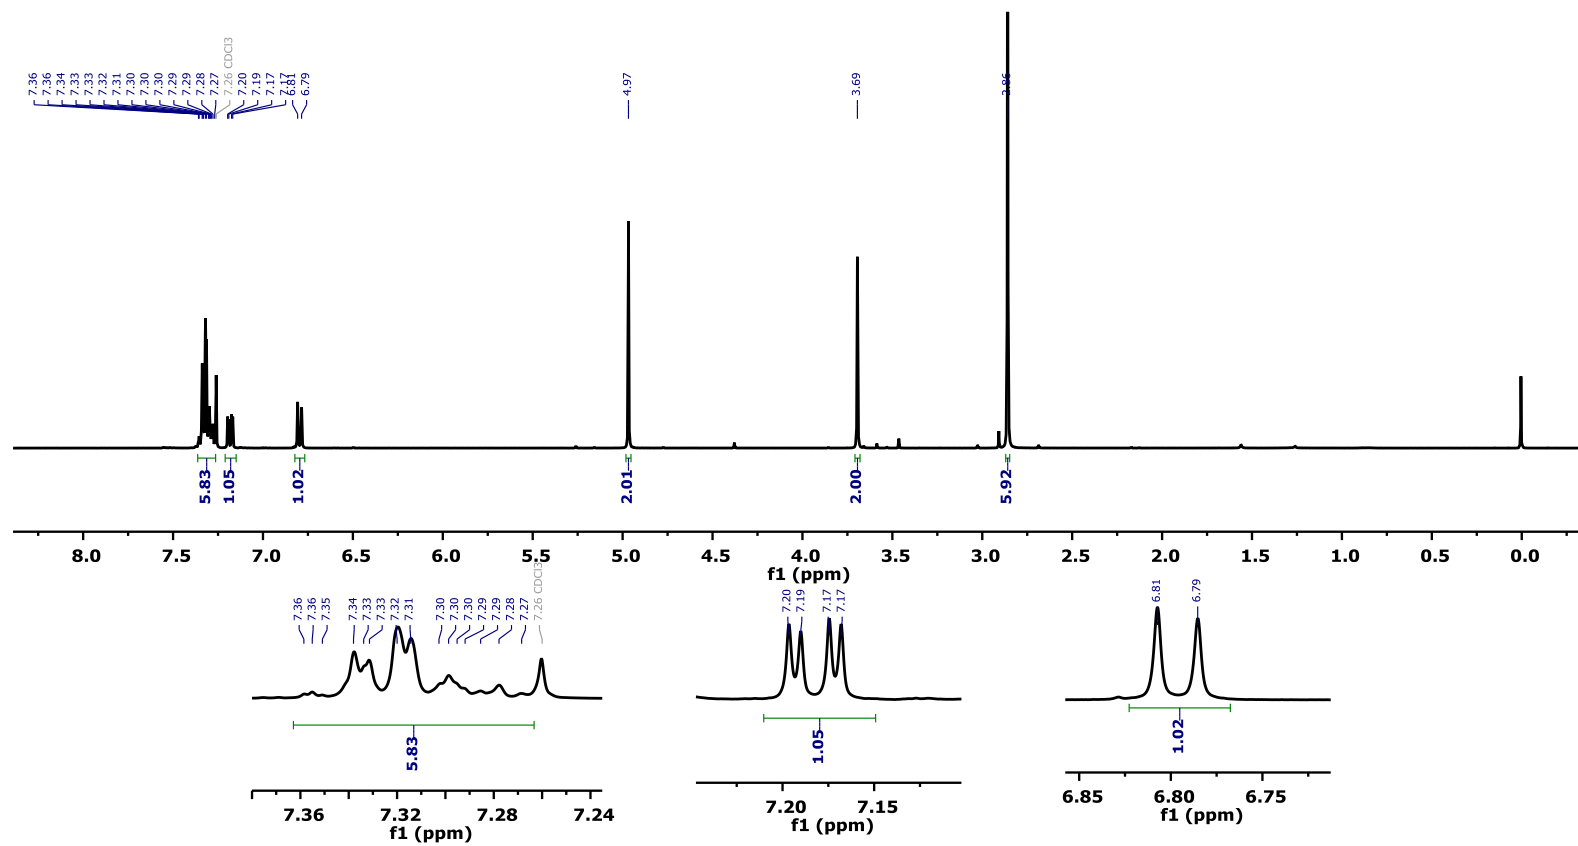

$^{13}\text{C}\{\text{H}\}$  NMR ( $\text{CDCl}_3$ , 101 MHz)

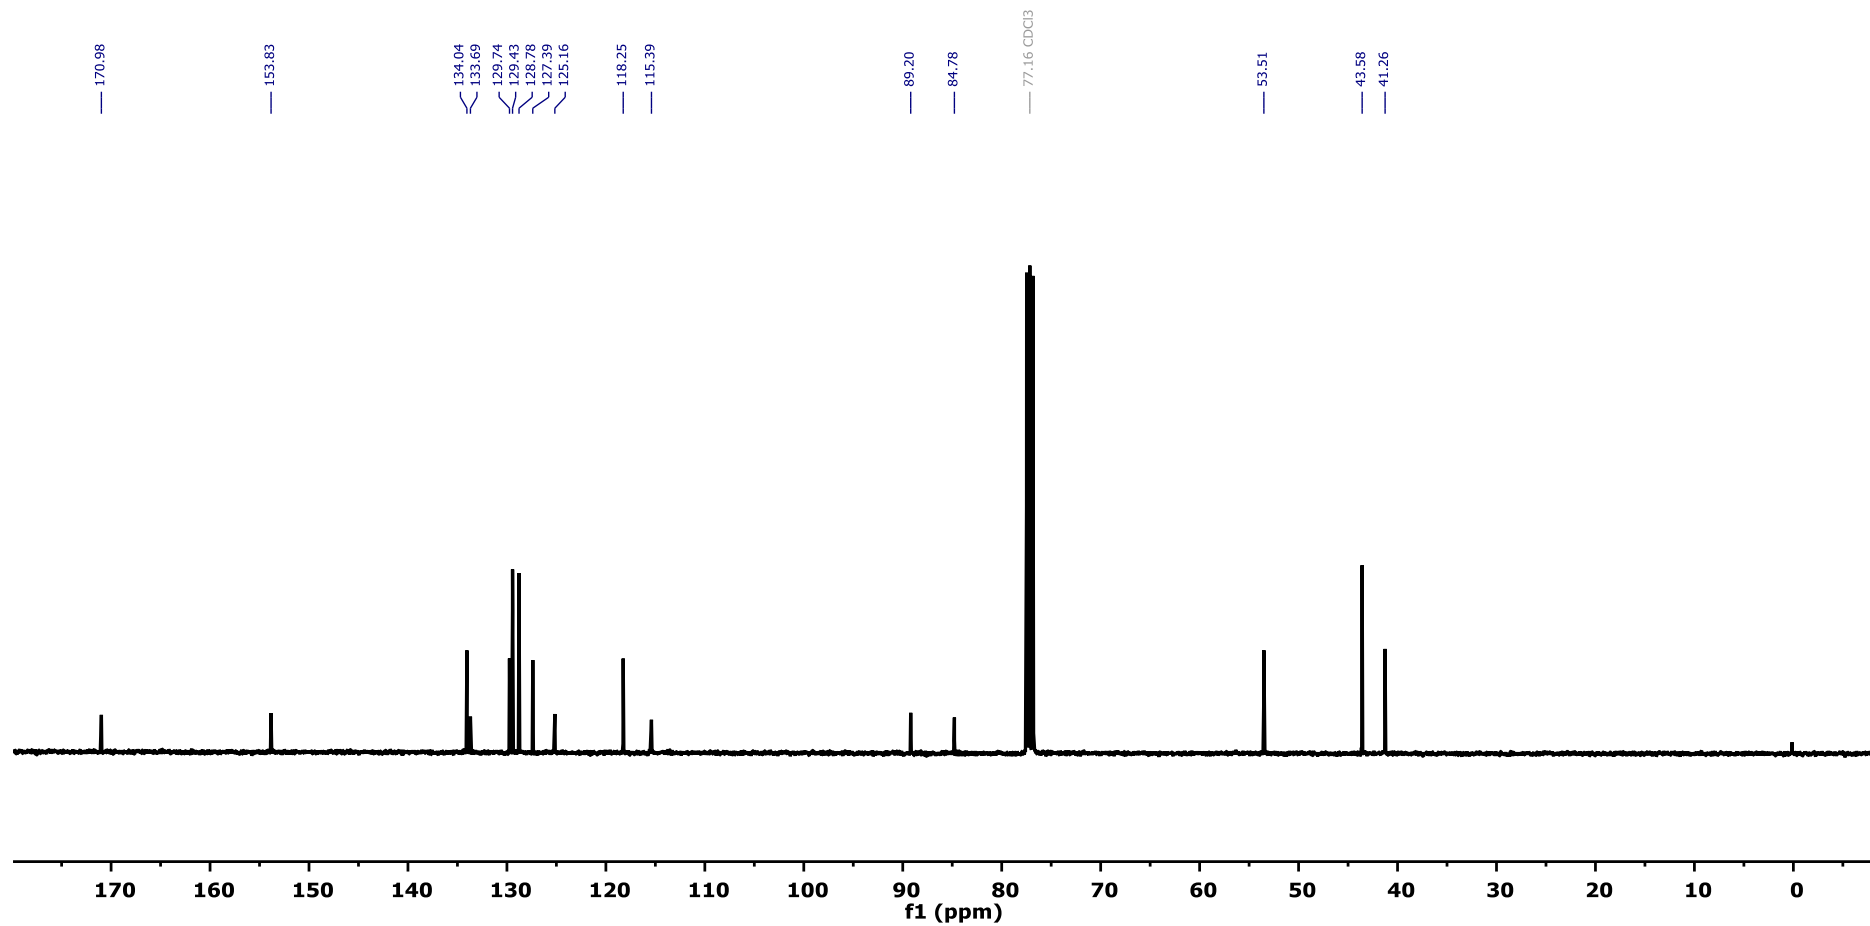



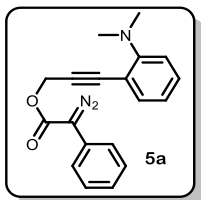

<sup>1</sup>H NMR (400 MHz, CDCl<sub>3</sub>)

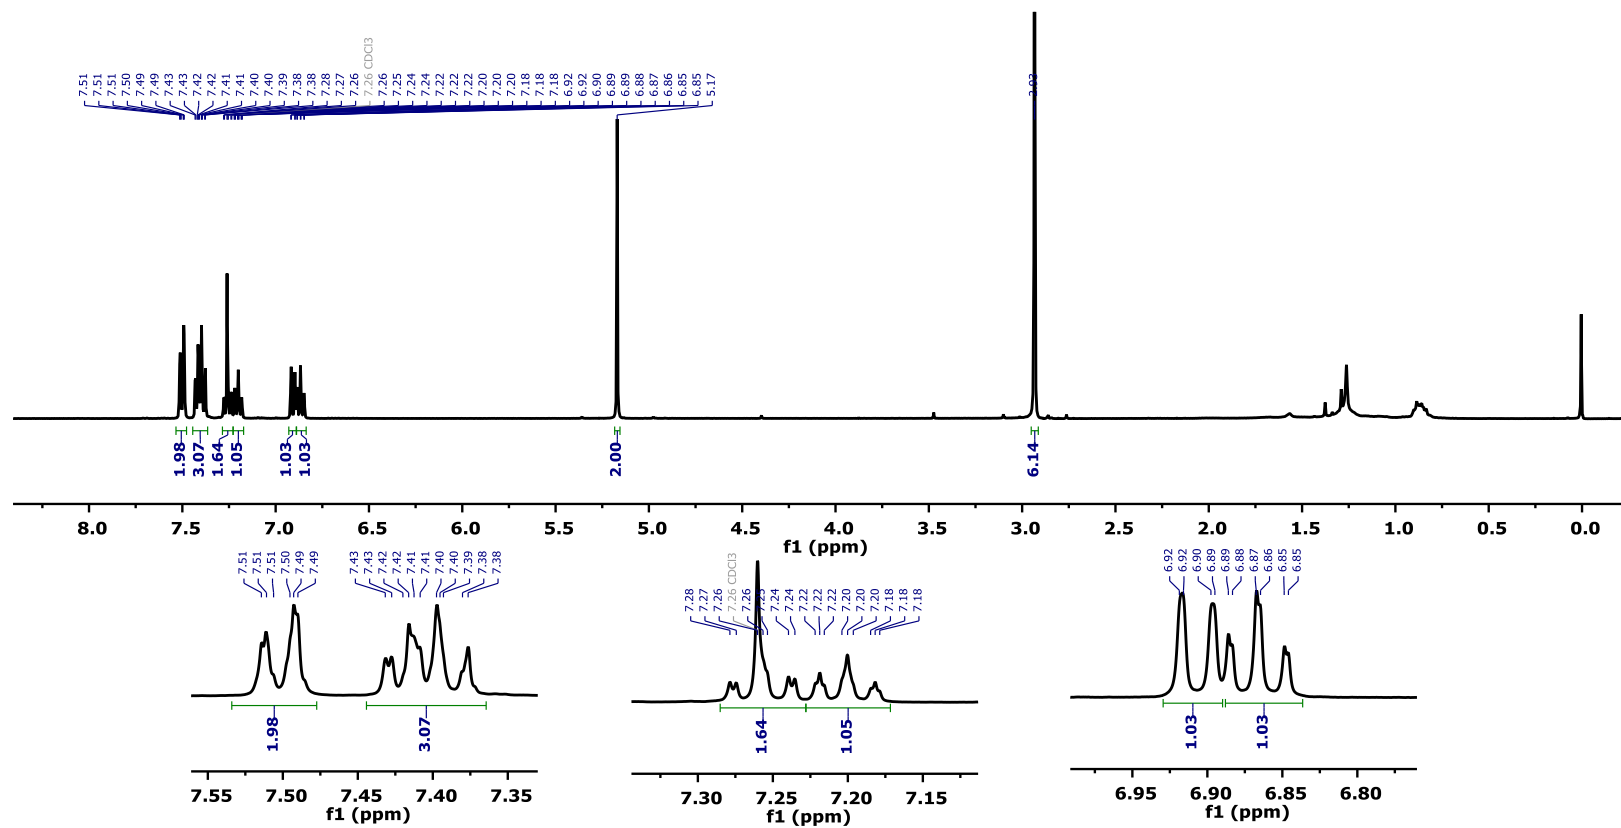

$^{13}\text{C}\{\text{H}\}$  NMR ( $\text{CDCl}_3$ , 101 MHz)

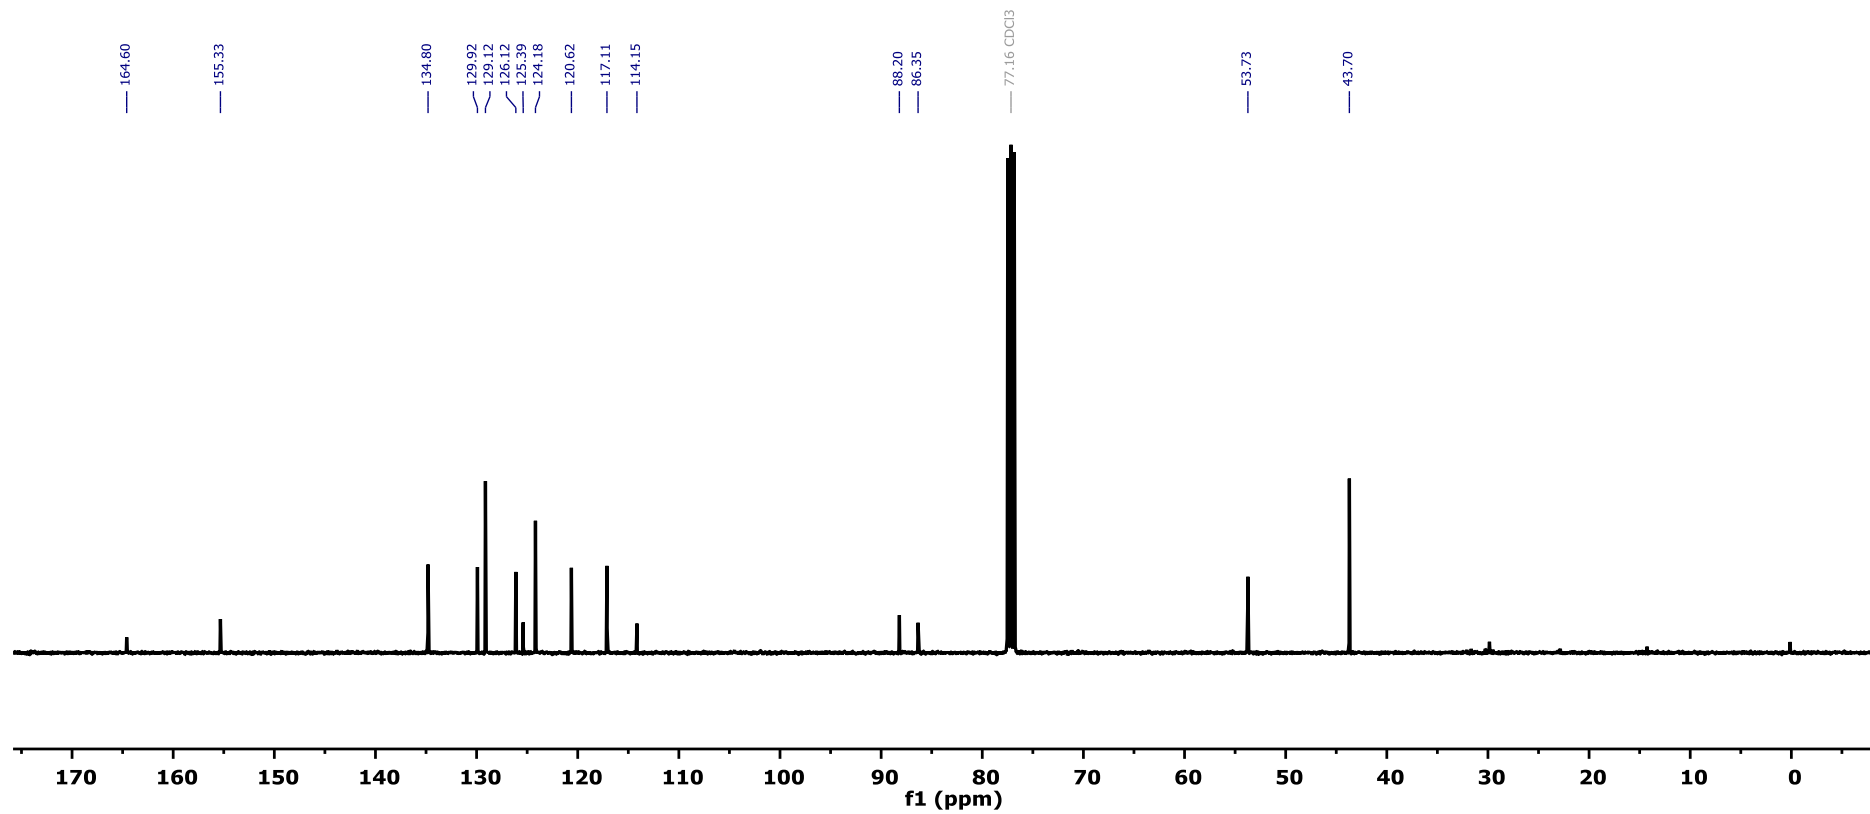

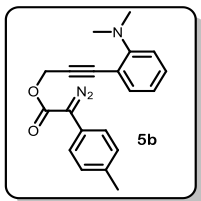

<sup>1</sup>H NMR (400 MHz, CDCl<sub>3</sub>)

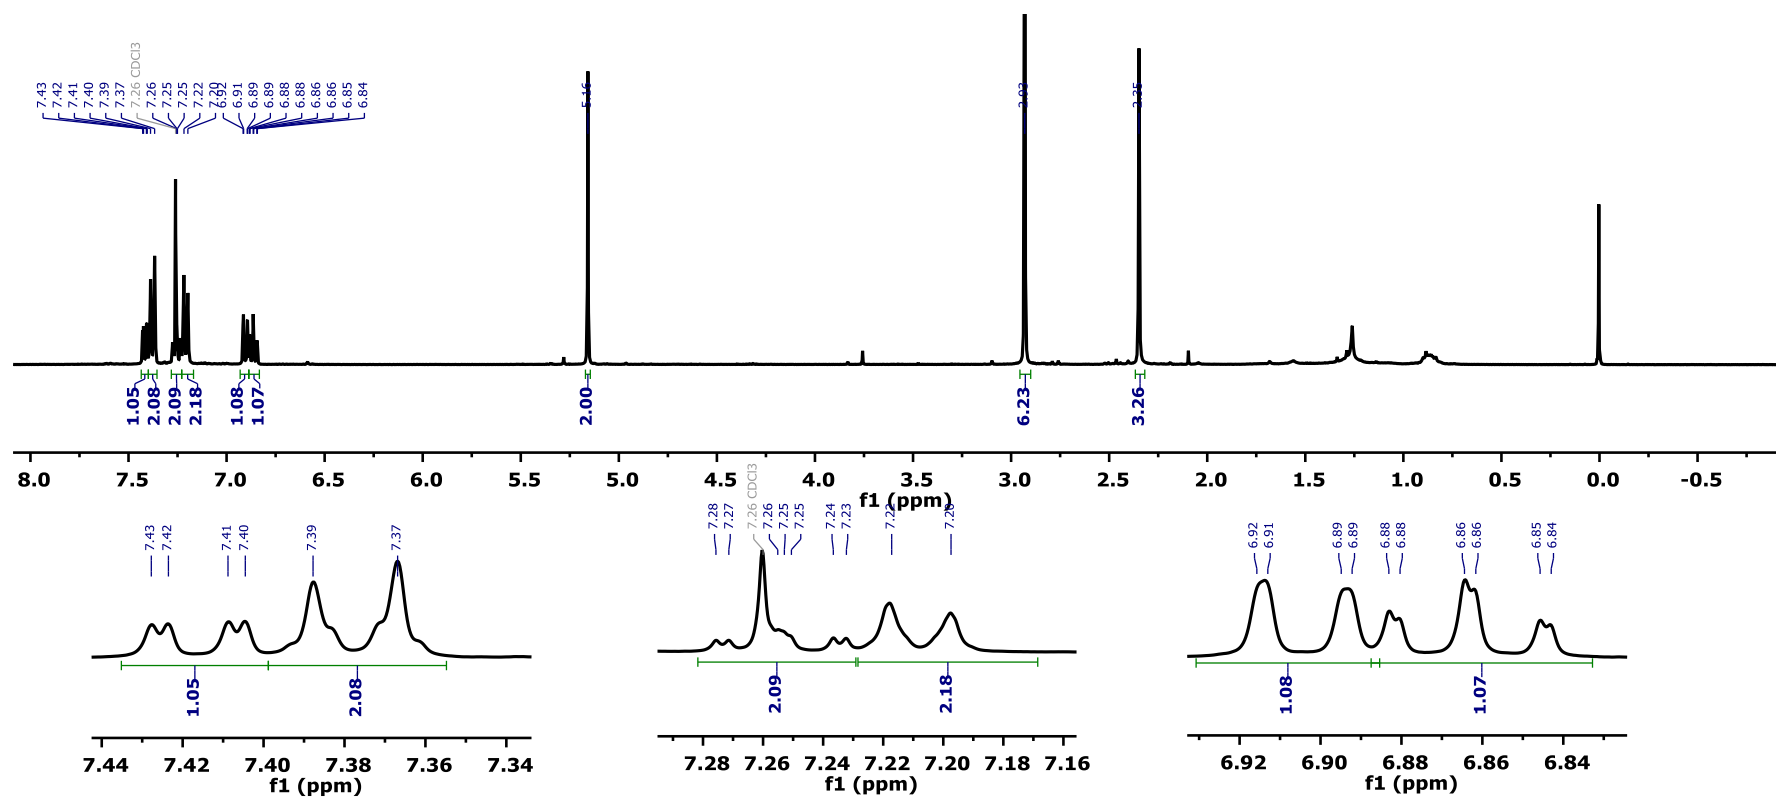

<sup>13</sup>C{H} NMR (CDCl<sub>3</sub>, 101 MHz)

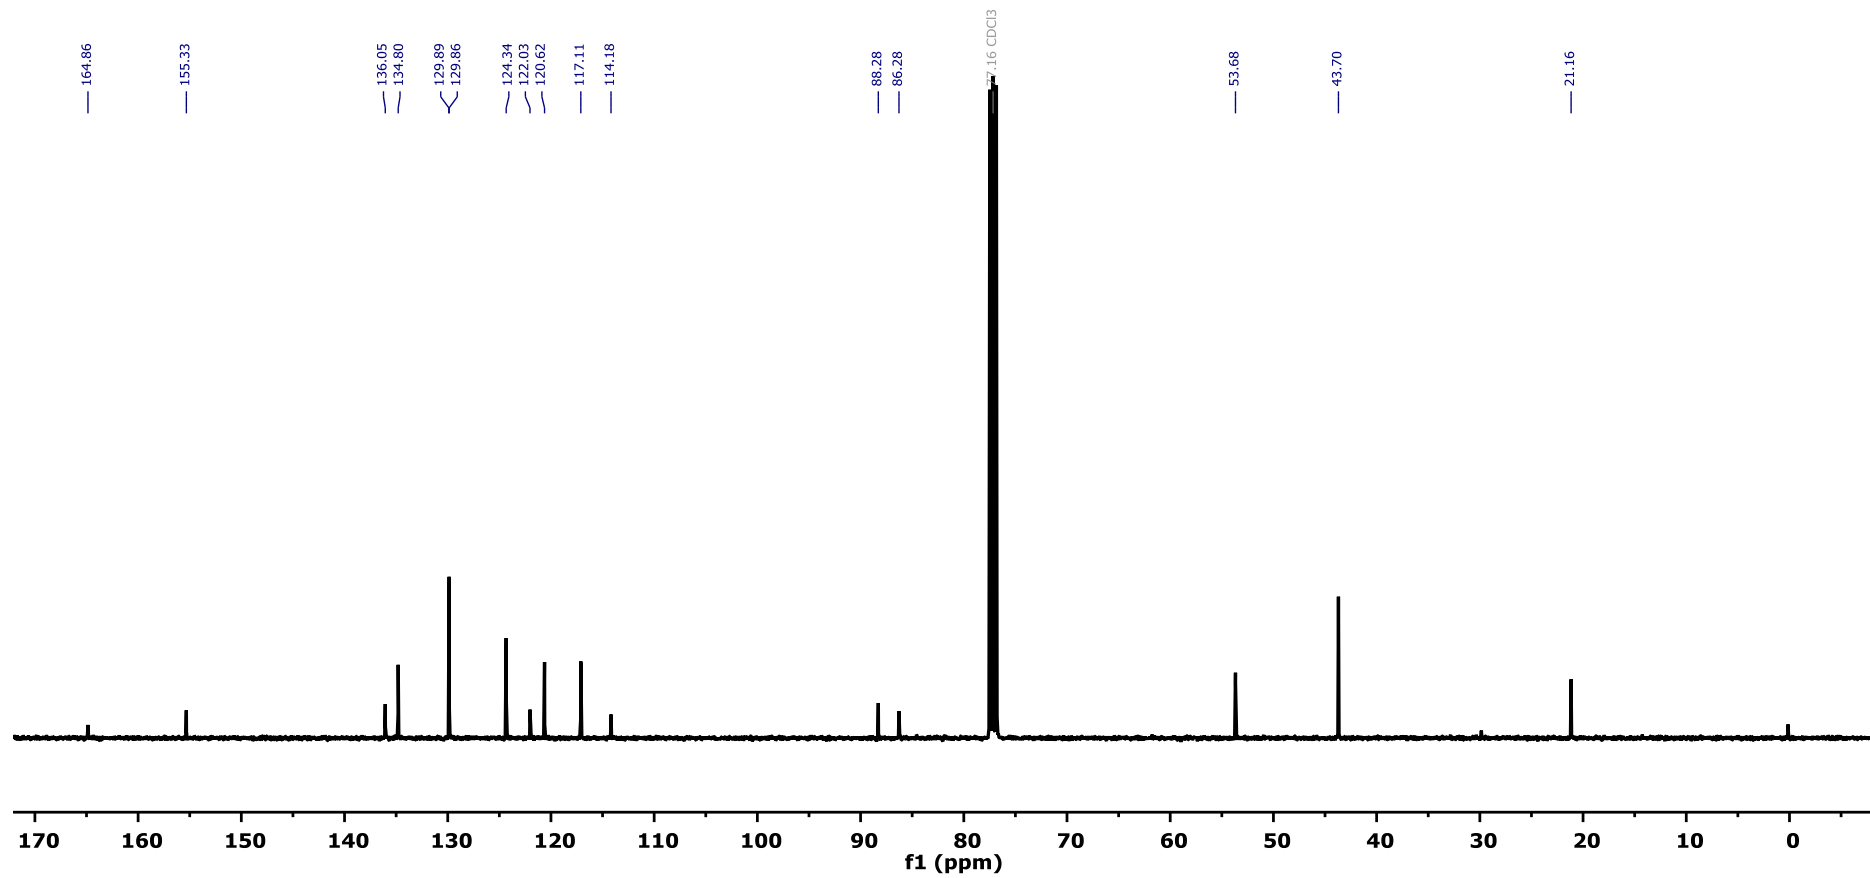

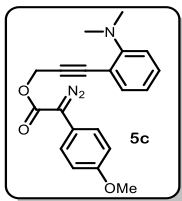

<sup>1</sup>H NMR (400 MHz, CDCl<sub>3</sub>)

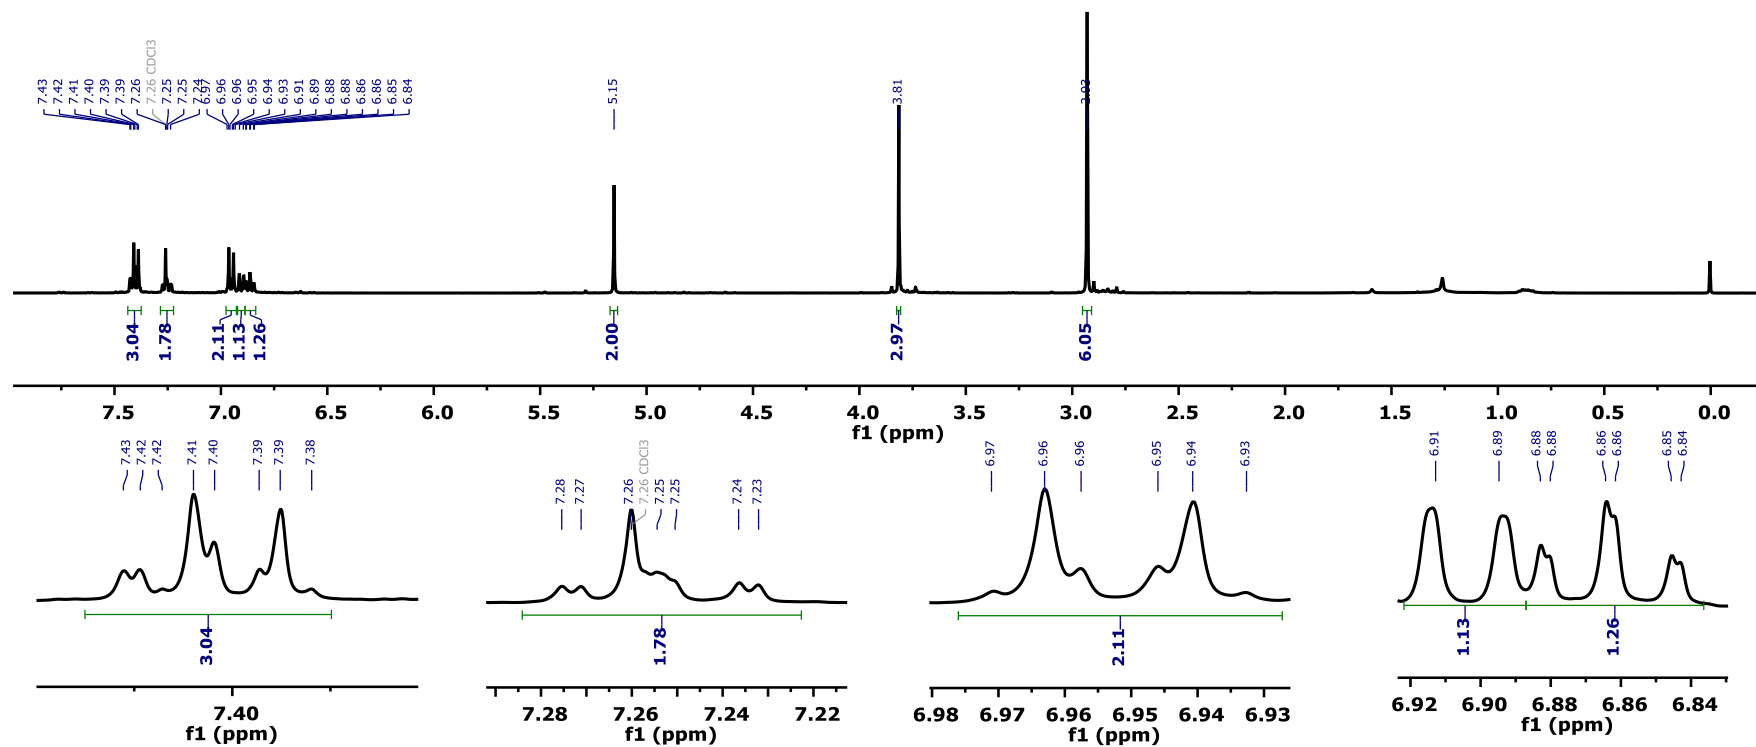

$^{13}\text{C}\{\text{H}\}$  NMR ( $\text{CDCl}_3$ , 101 MHz)

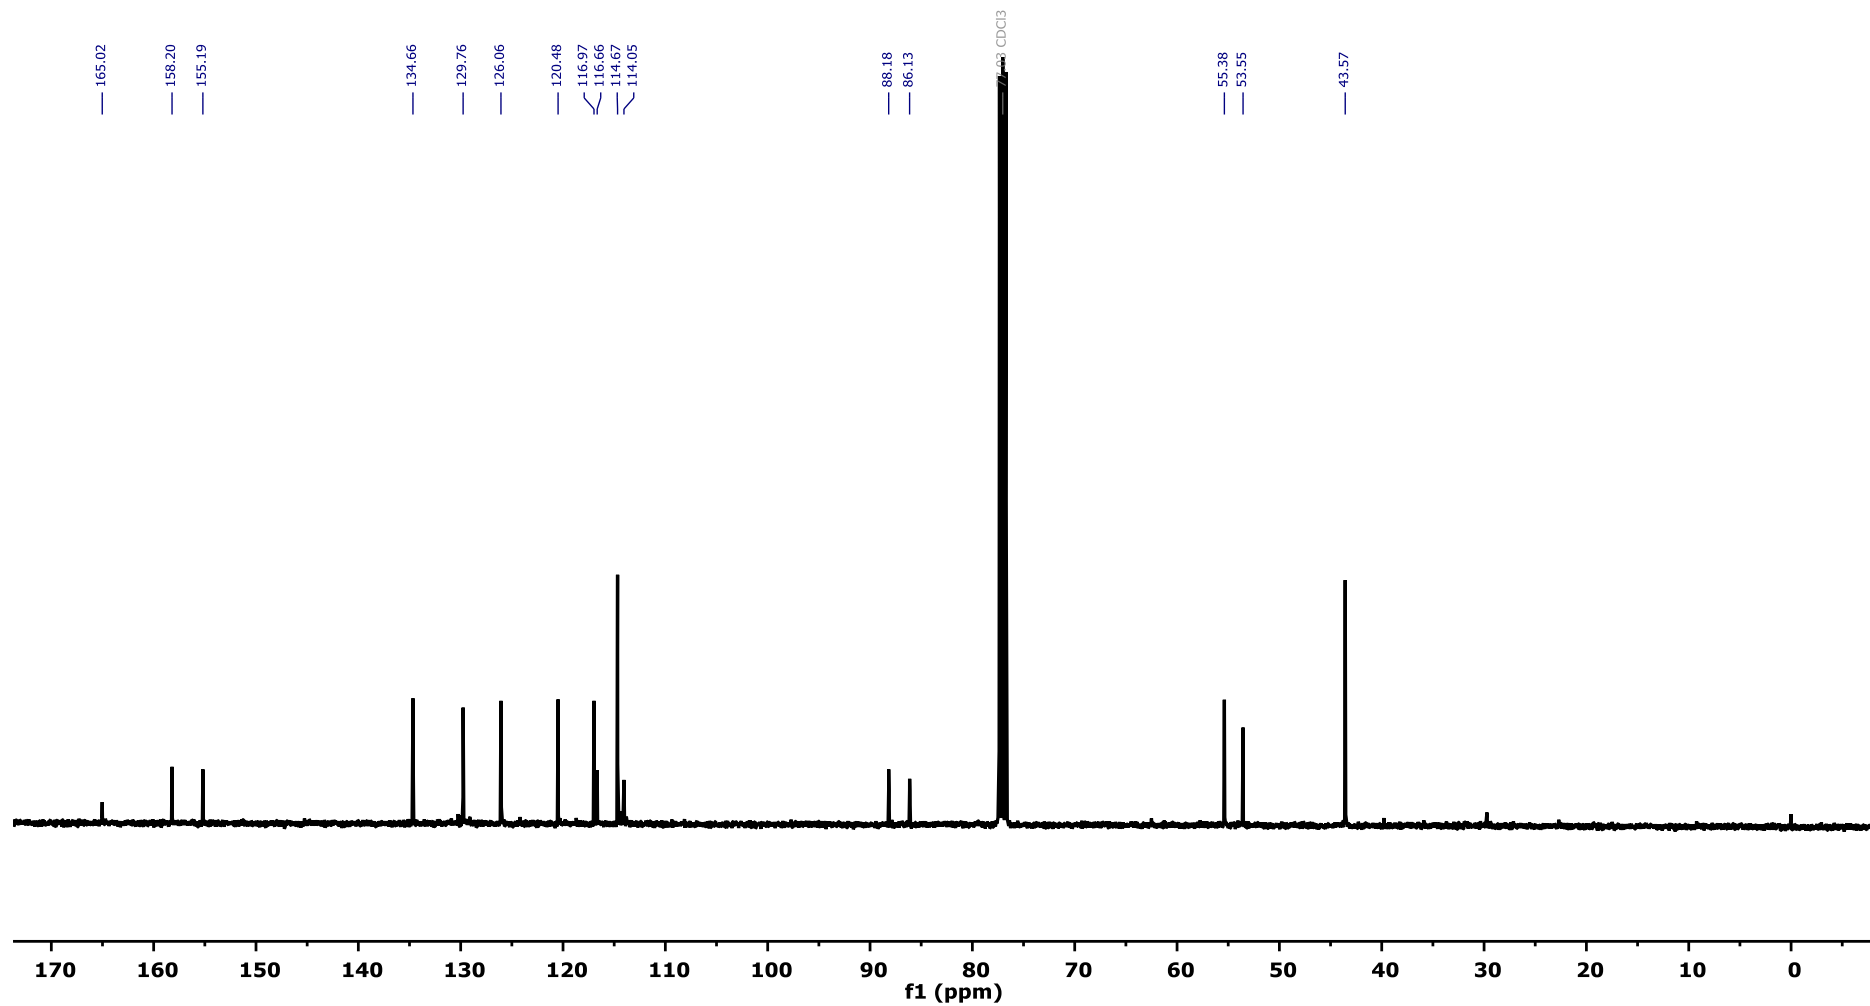

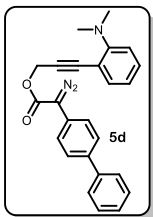

<sup>1</sup>H NMR (400 MHz, CDCl<sub>3</sub>)

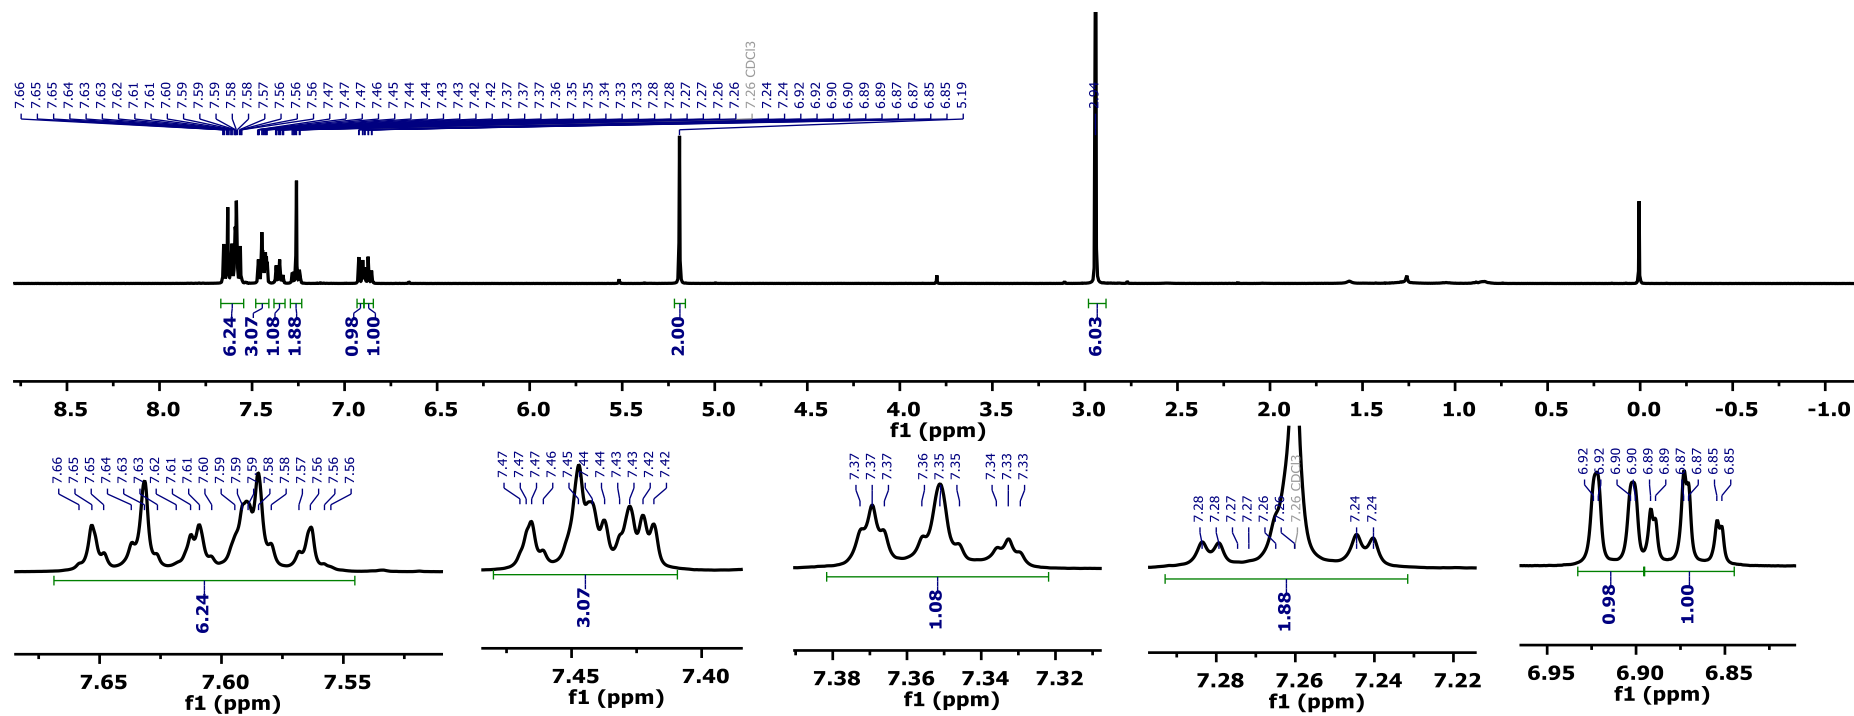

$^{13}\text{C}\{\text{H}\}$  NMR ( $\text{CDCl}_3$ , 101 MHz)

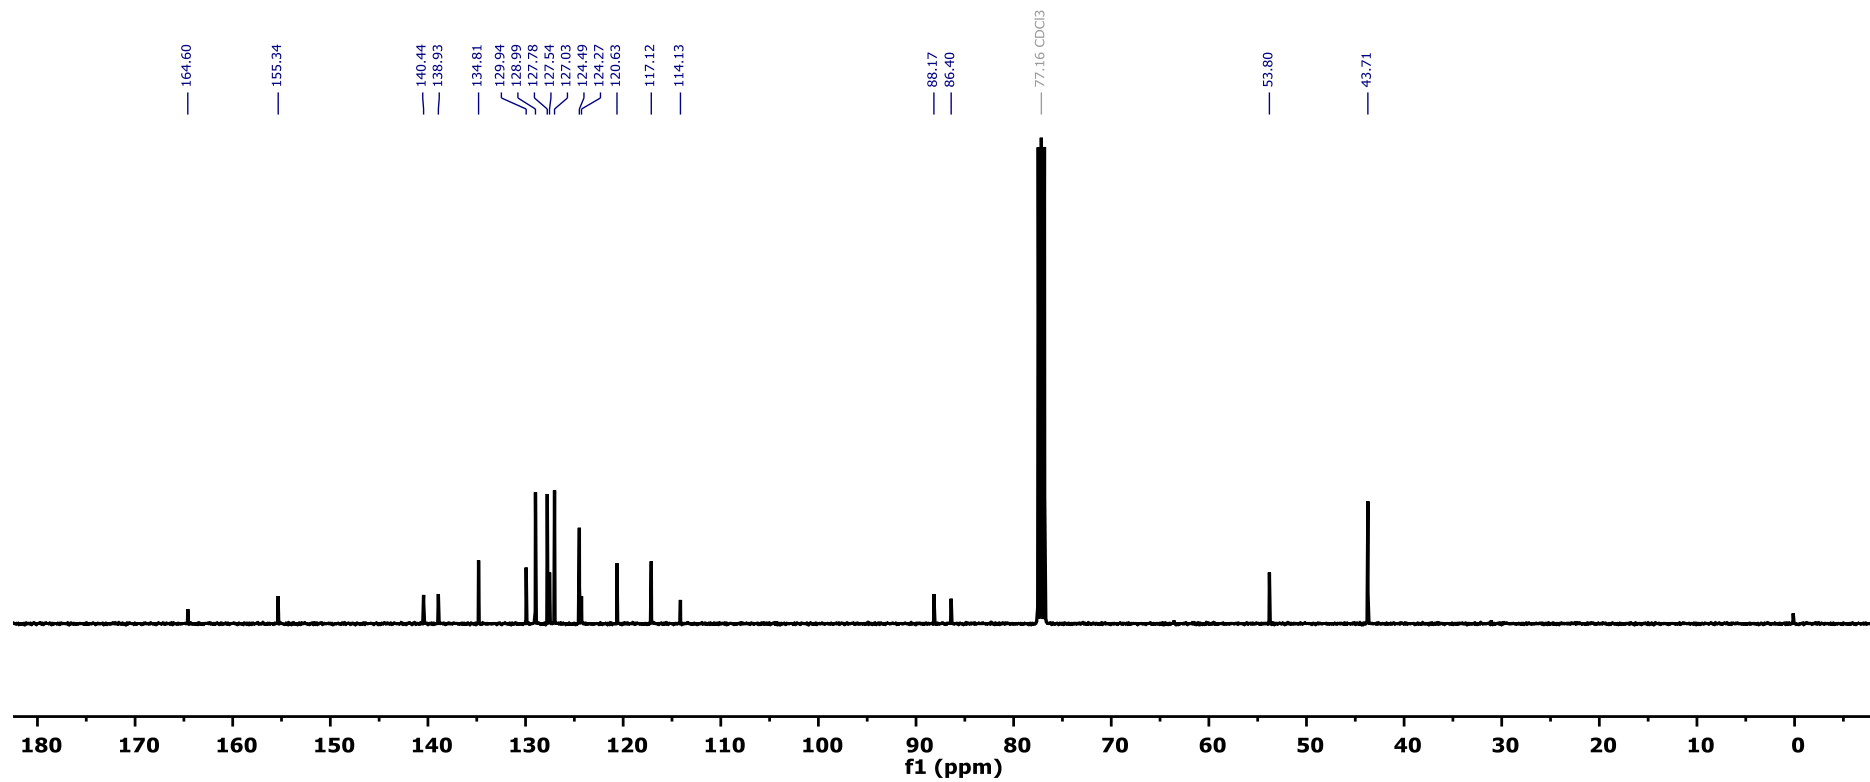



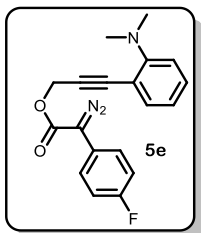

<sup>1</sup>H NMR (400 MHz, CDCl<sub>3</sub>)

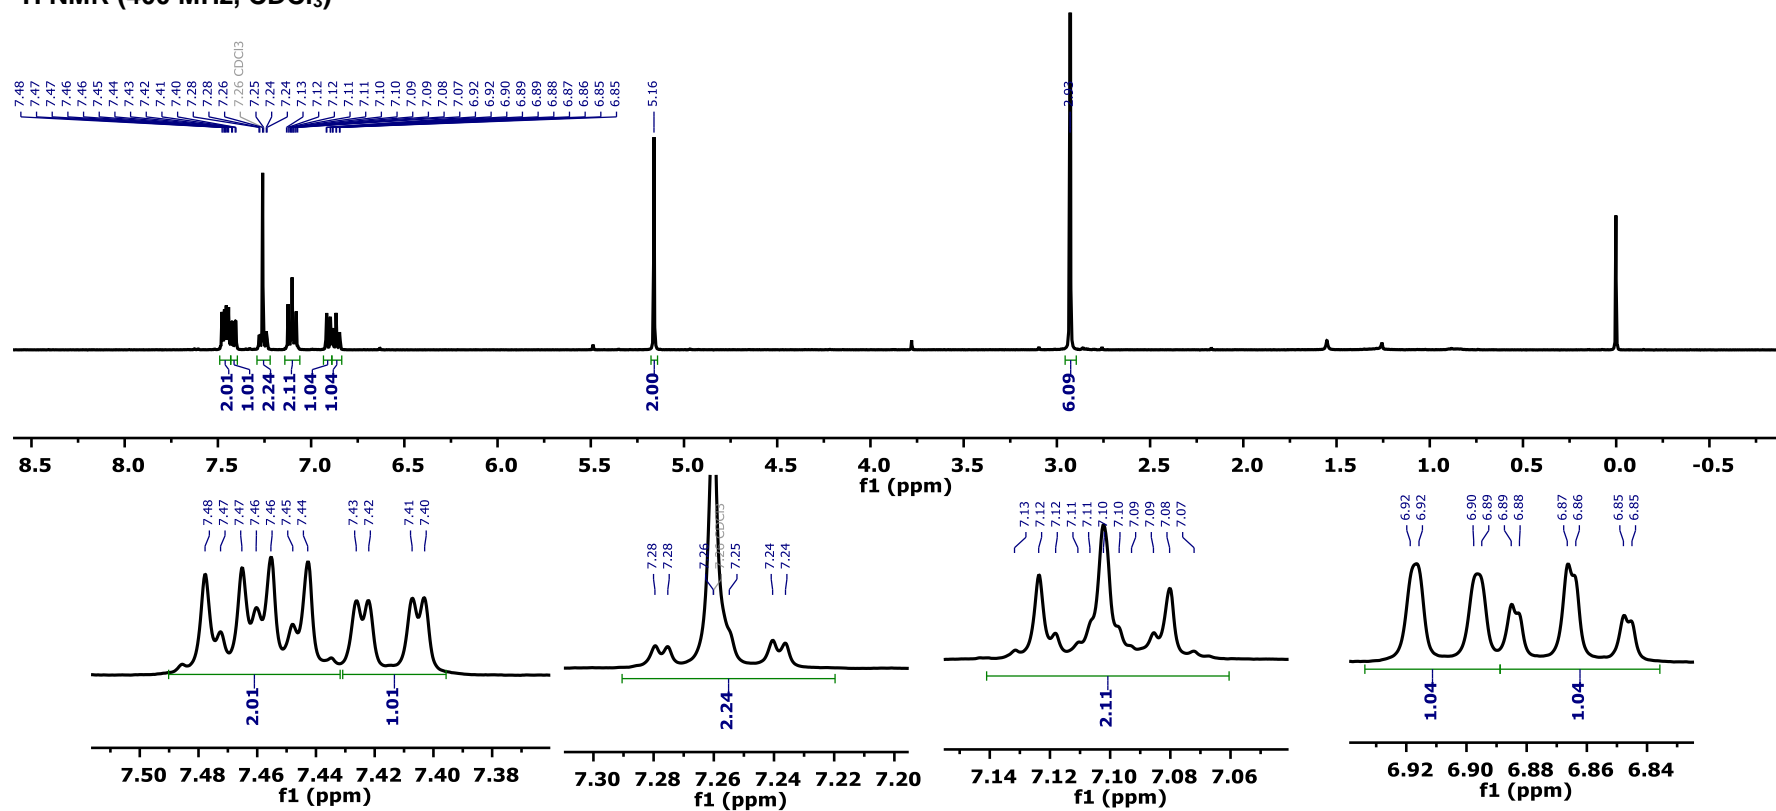

$^{13}\text{C}\{\text{H}\}$  NMR ( $\text{CDCl}_3$ , 101 MHz)

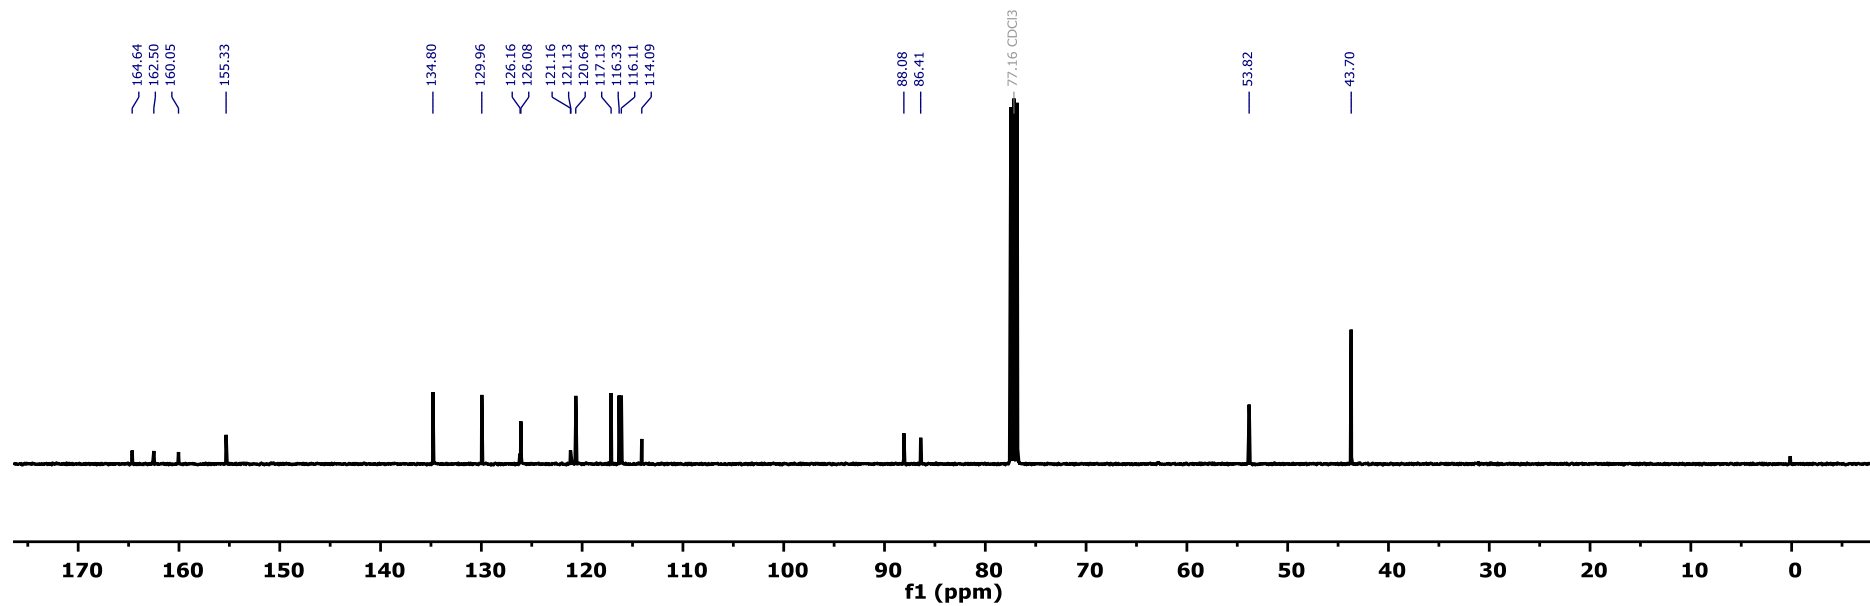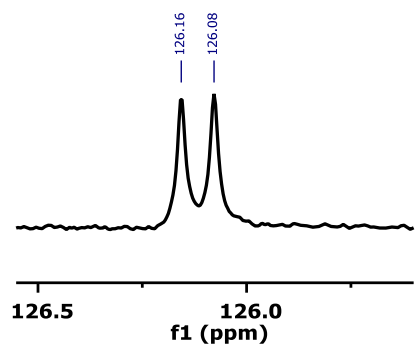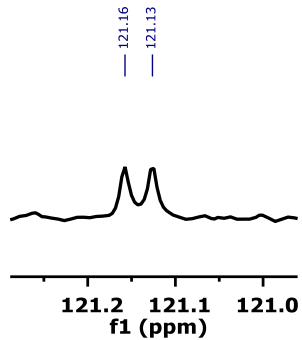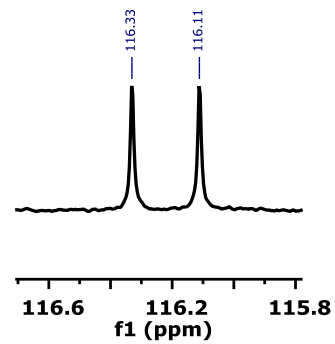

$^{19}\text{F}$  NMR ( $\text{CDCl}_3$ , 376 MHz):

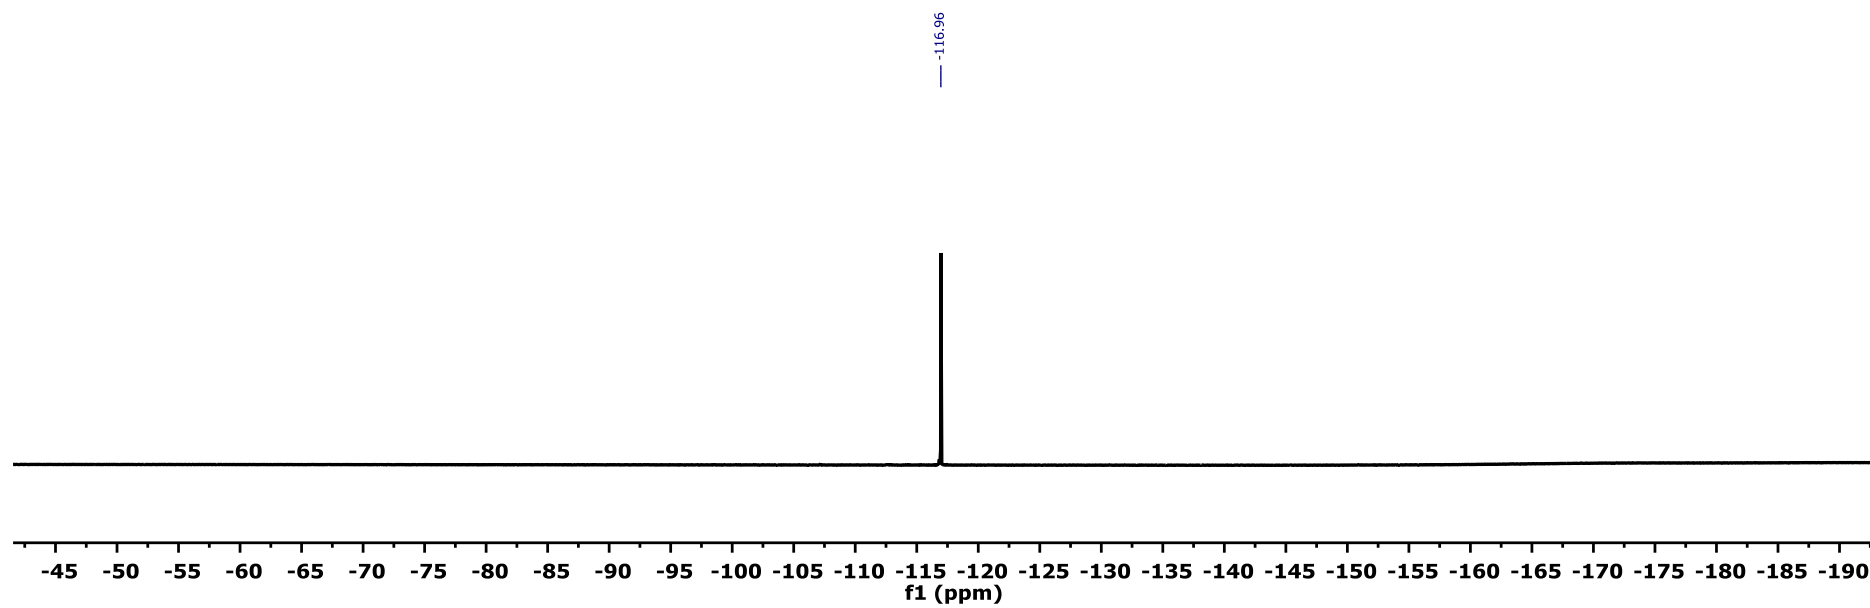

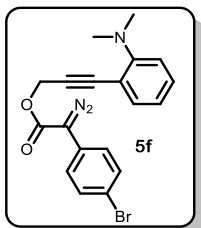

<sup>1</sup>H NMR (400 MHz, CDCl<sub>3</sub>)

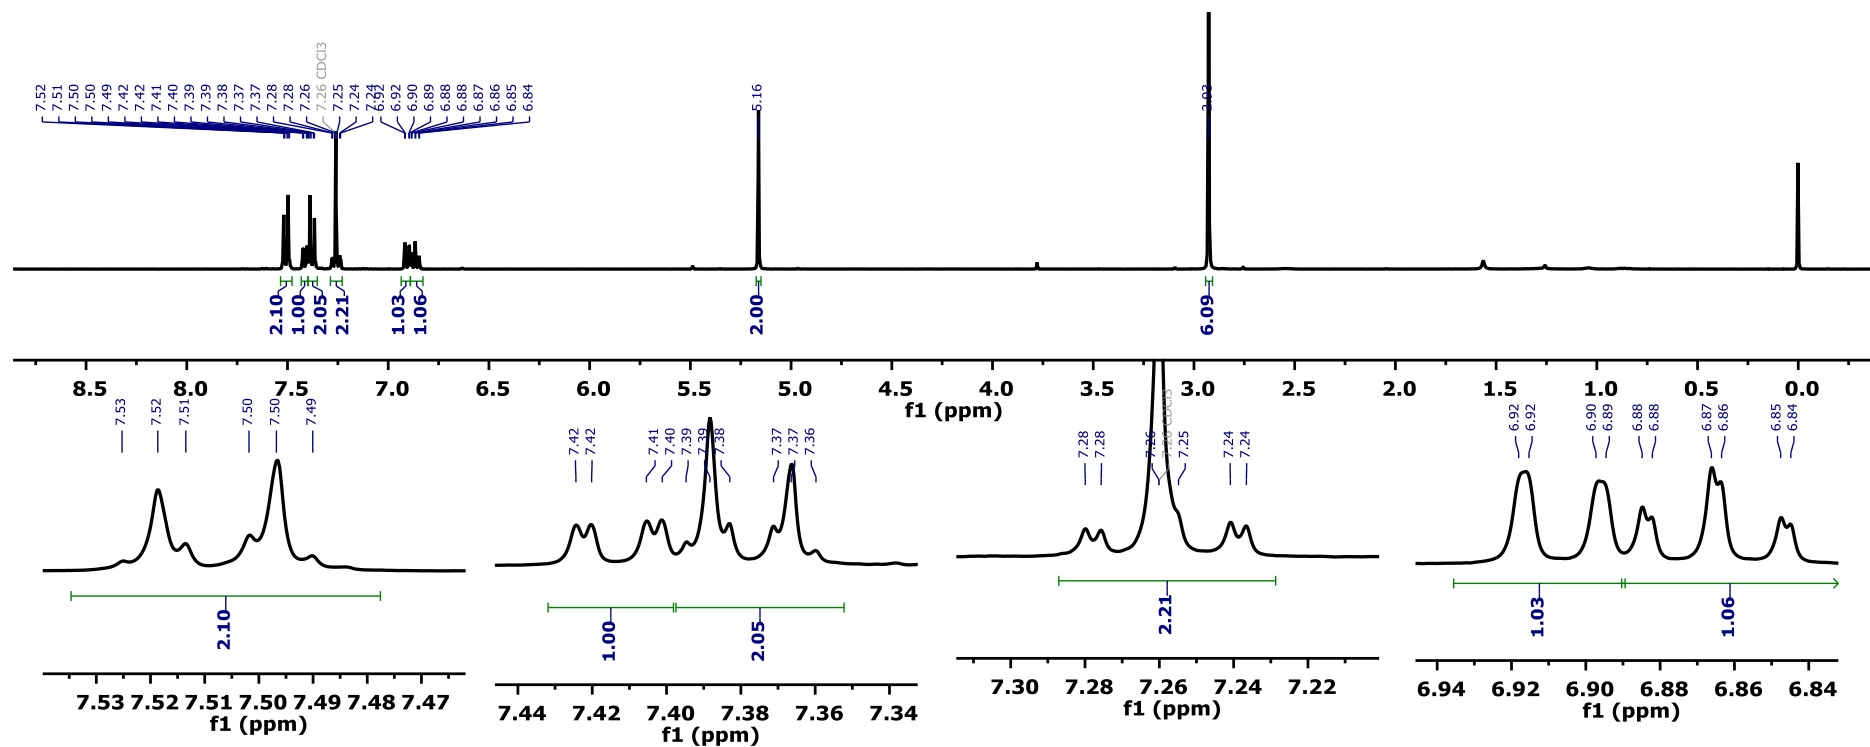

$^{13}\text{C}\{\text{H}\}$  NMR ( $\text{CDCl}_3$ , 101 MHz)

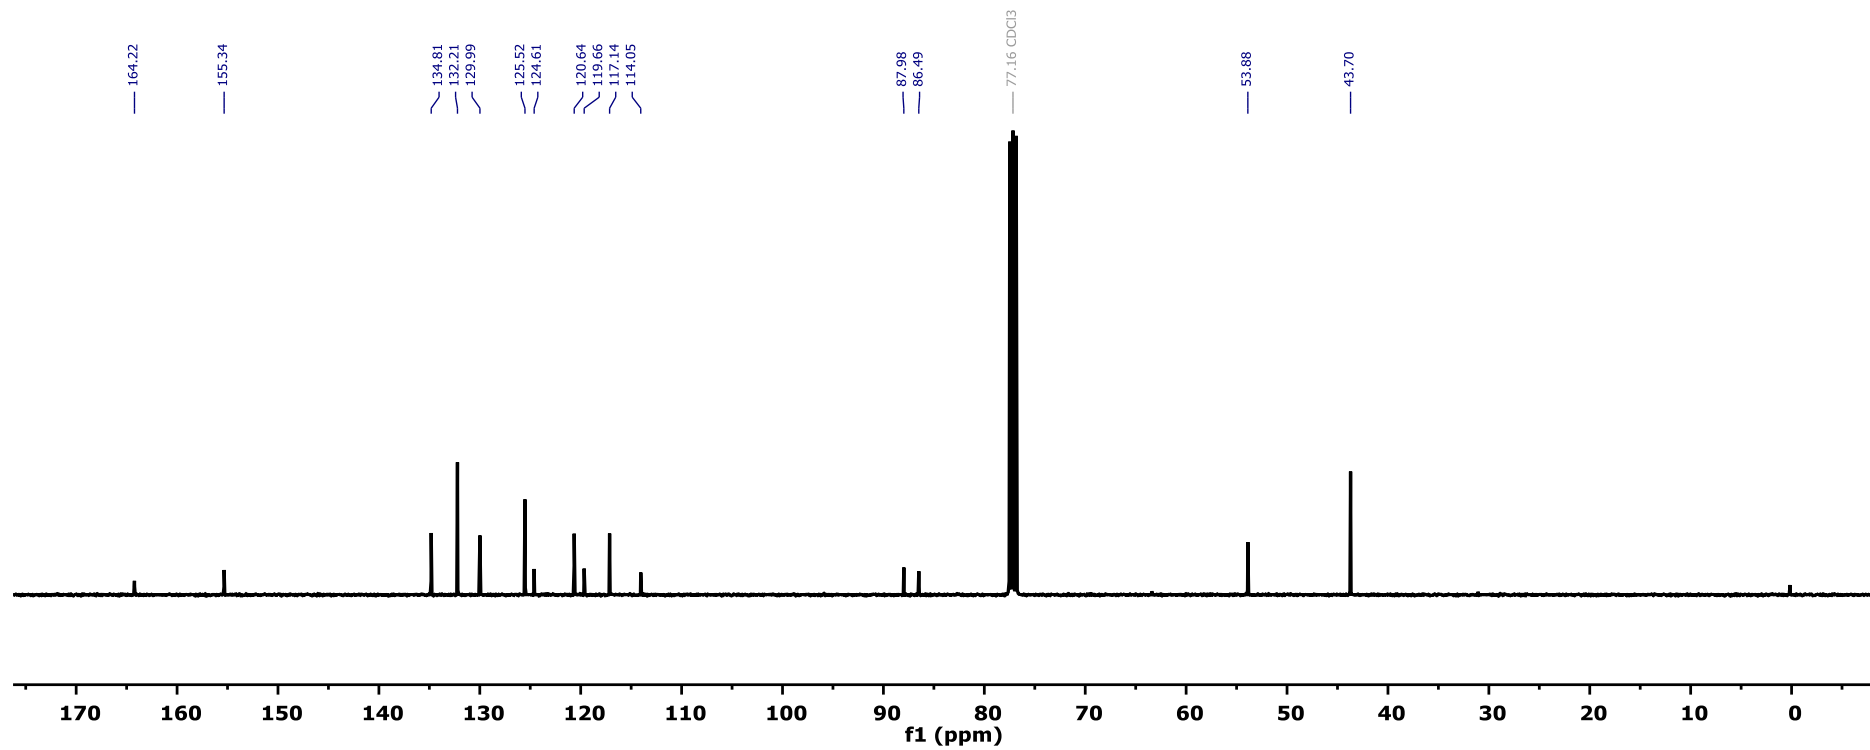

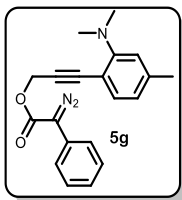

<sup>1</sup>H NMR (400 MHz, CDCl<sub>3</sub>)

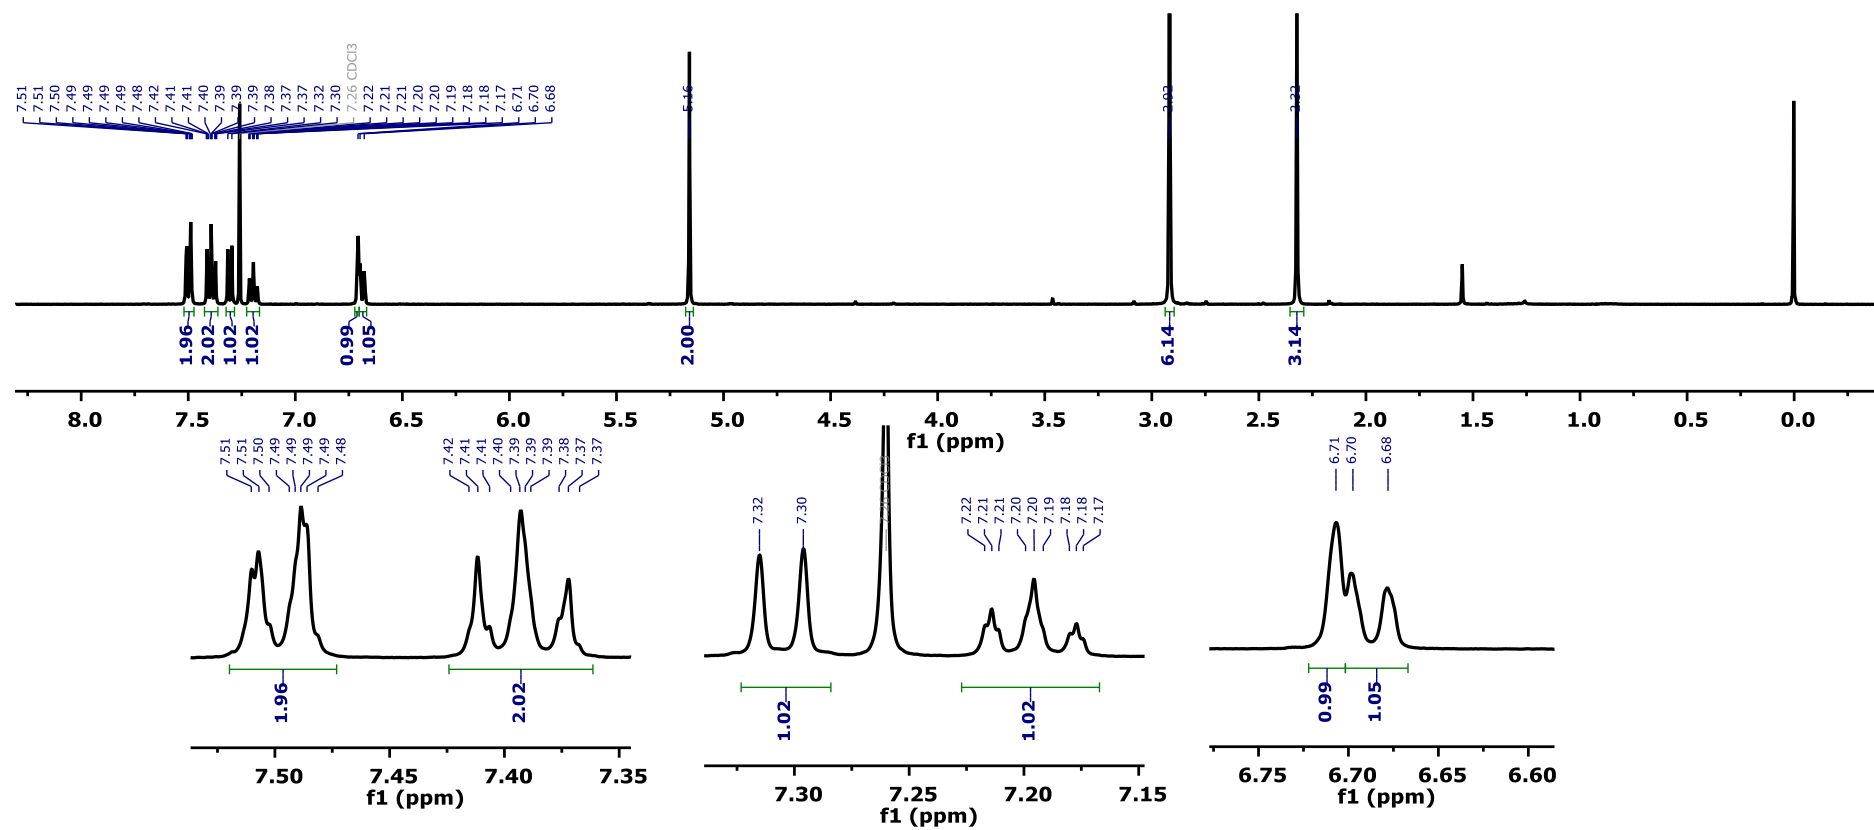

$^{13}\text{C}\{\text{H}\}$  NMR ( $\text{CDCl}_3$ , 101 MHz)

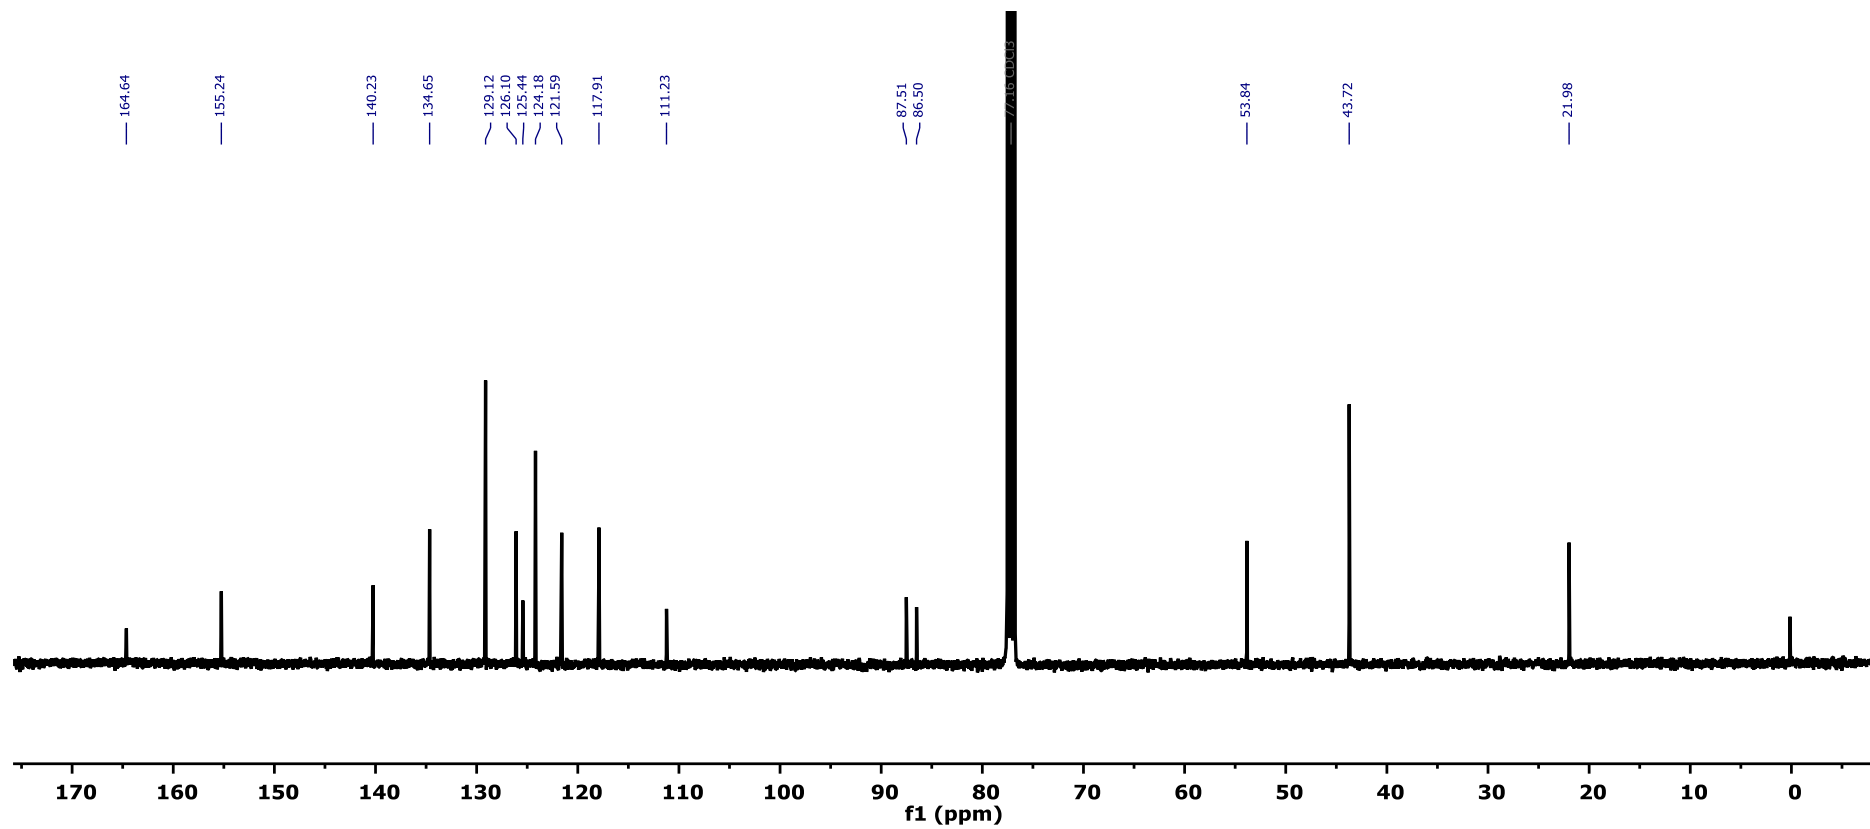

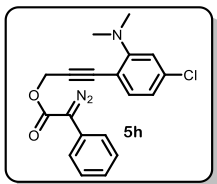

<sup>1</sup>H NMR (400 MHz, CDCl<sub>3</sub>)

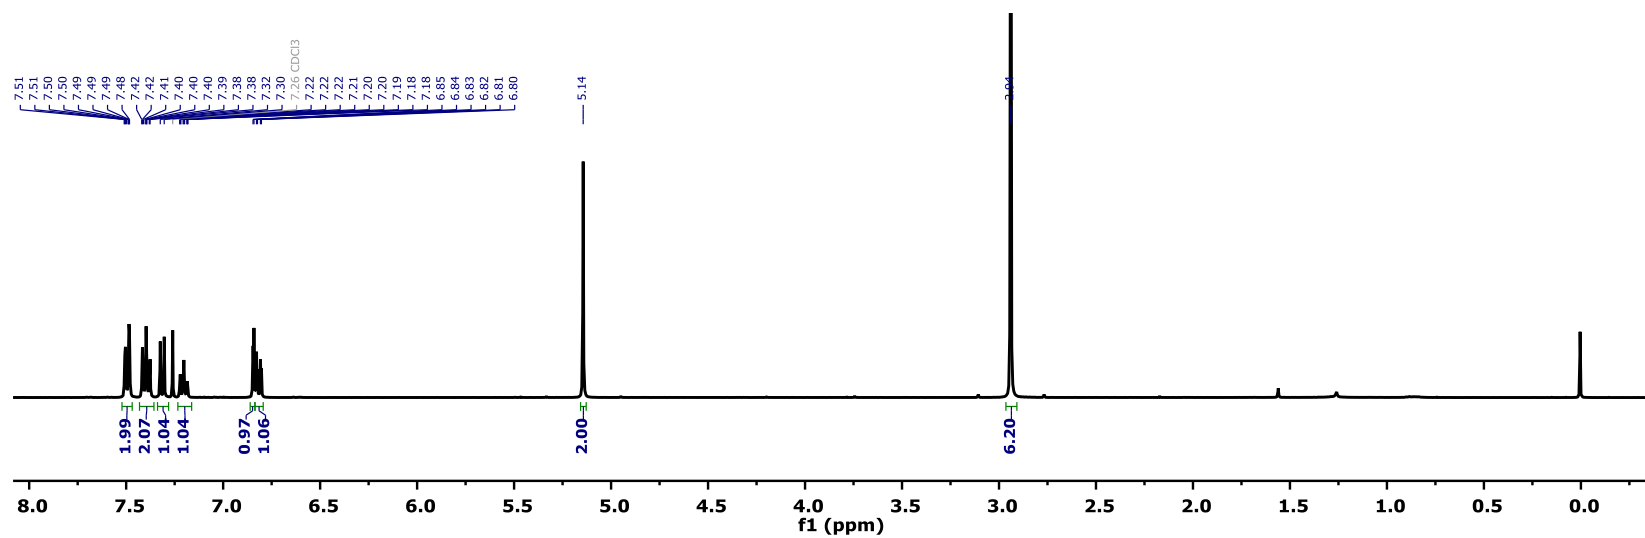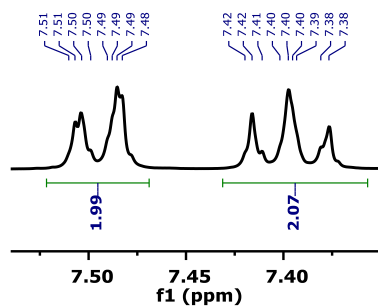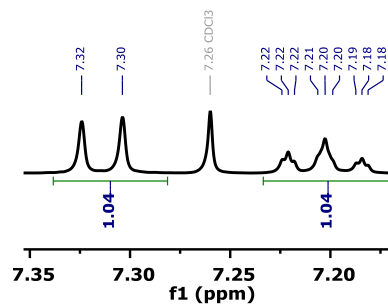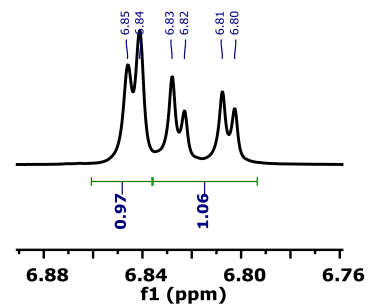



$^{13}\text{C}\{\text{H}\}$  NMR ( $\text{CDCl}_3$ , 101 MHz)

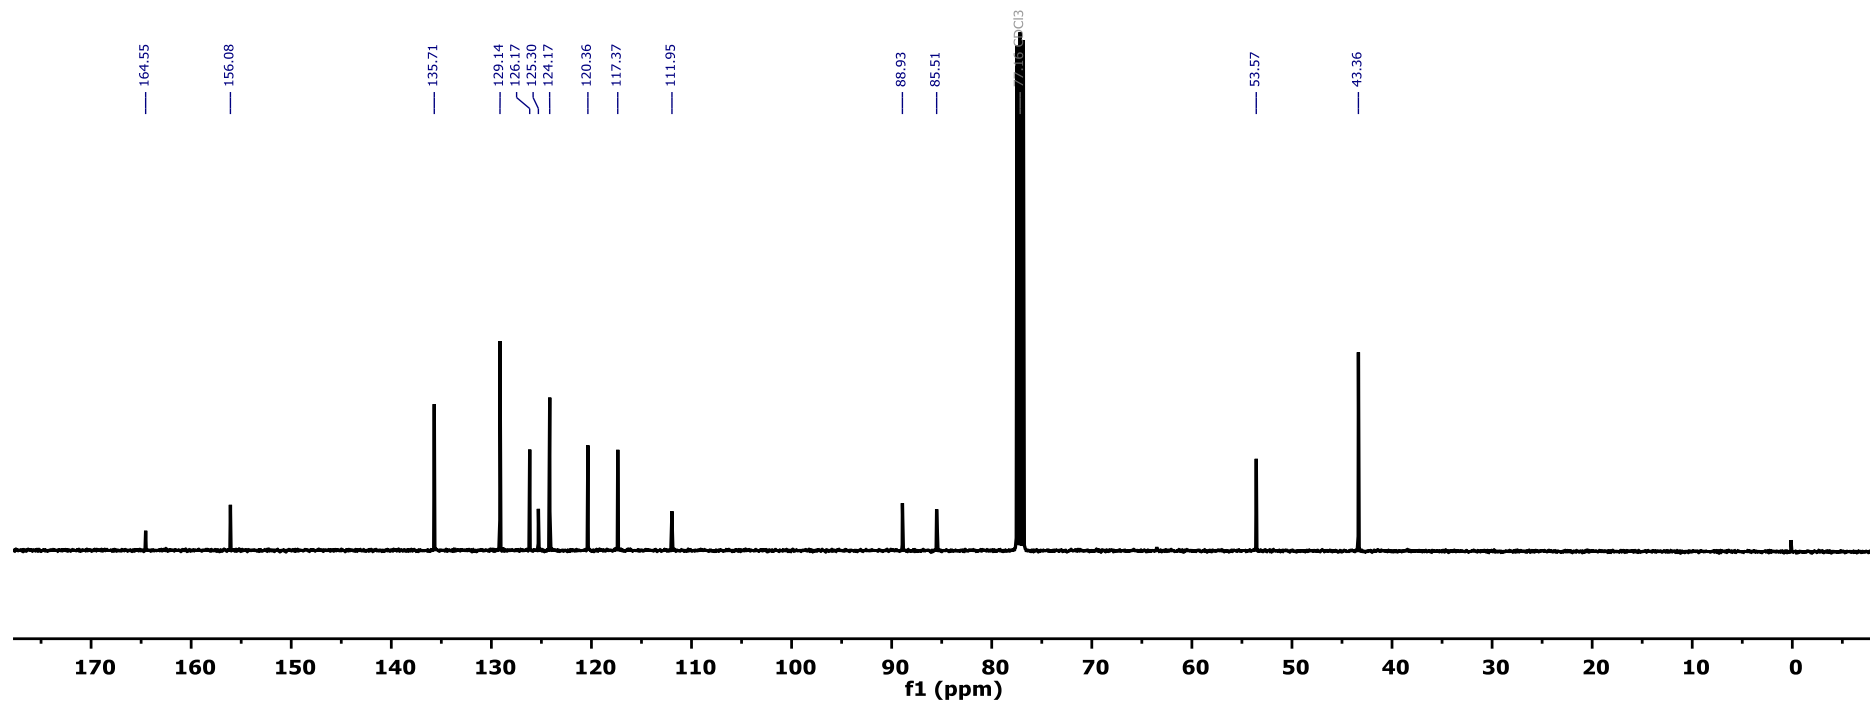

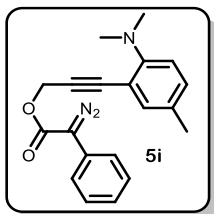

<sup>1</sup>H NMR (400 MHz, CDCl<sub>3</sub>)

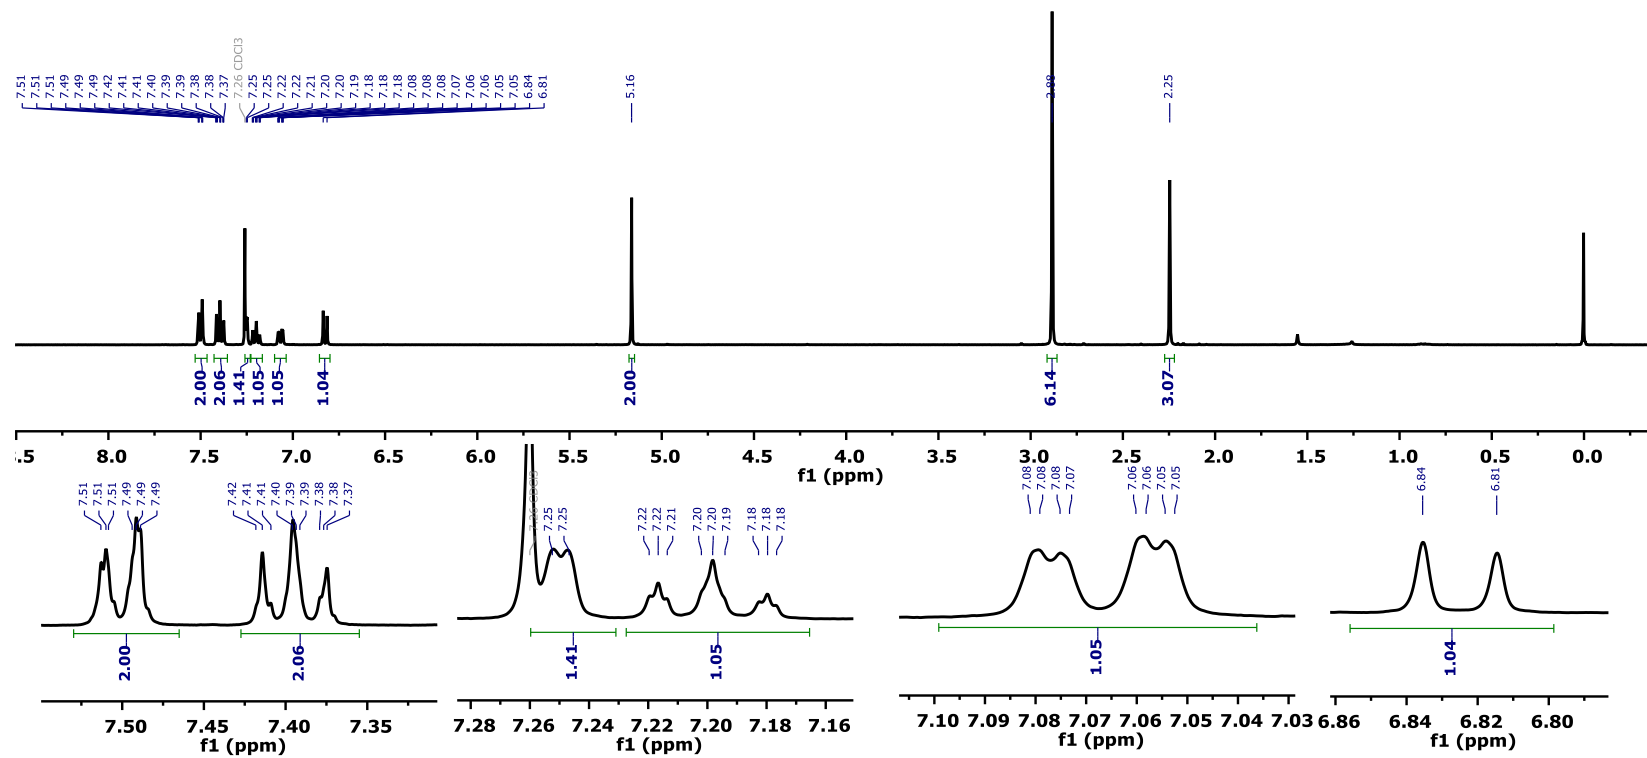

$^{13}\text{C}\{\text{H}\}$  NMR ( $\text{CDCl}_3$ , 101 MHz)

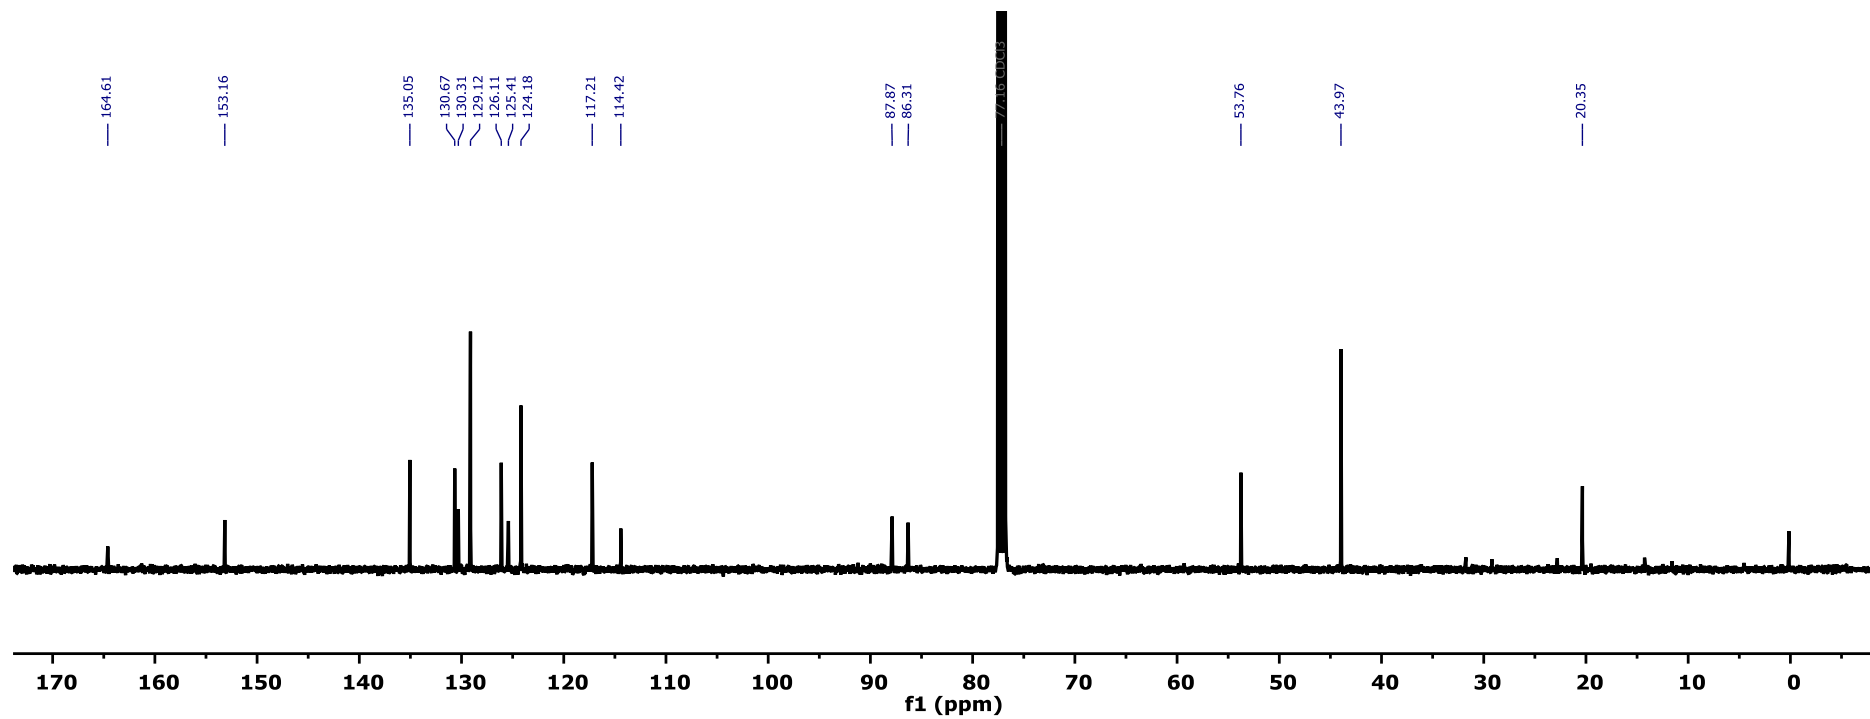

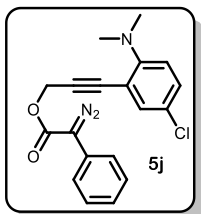

<sup>1</sup>H NMR (400 MHz, CDCl<sub>3</sub>)

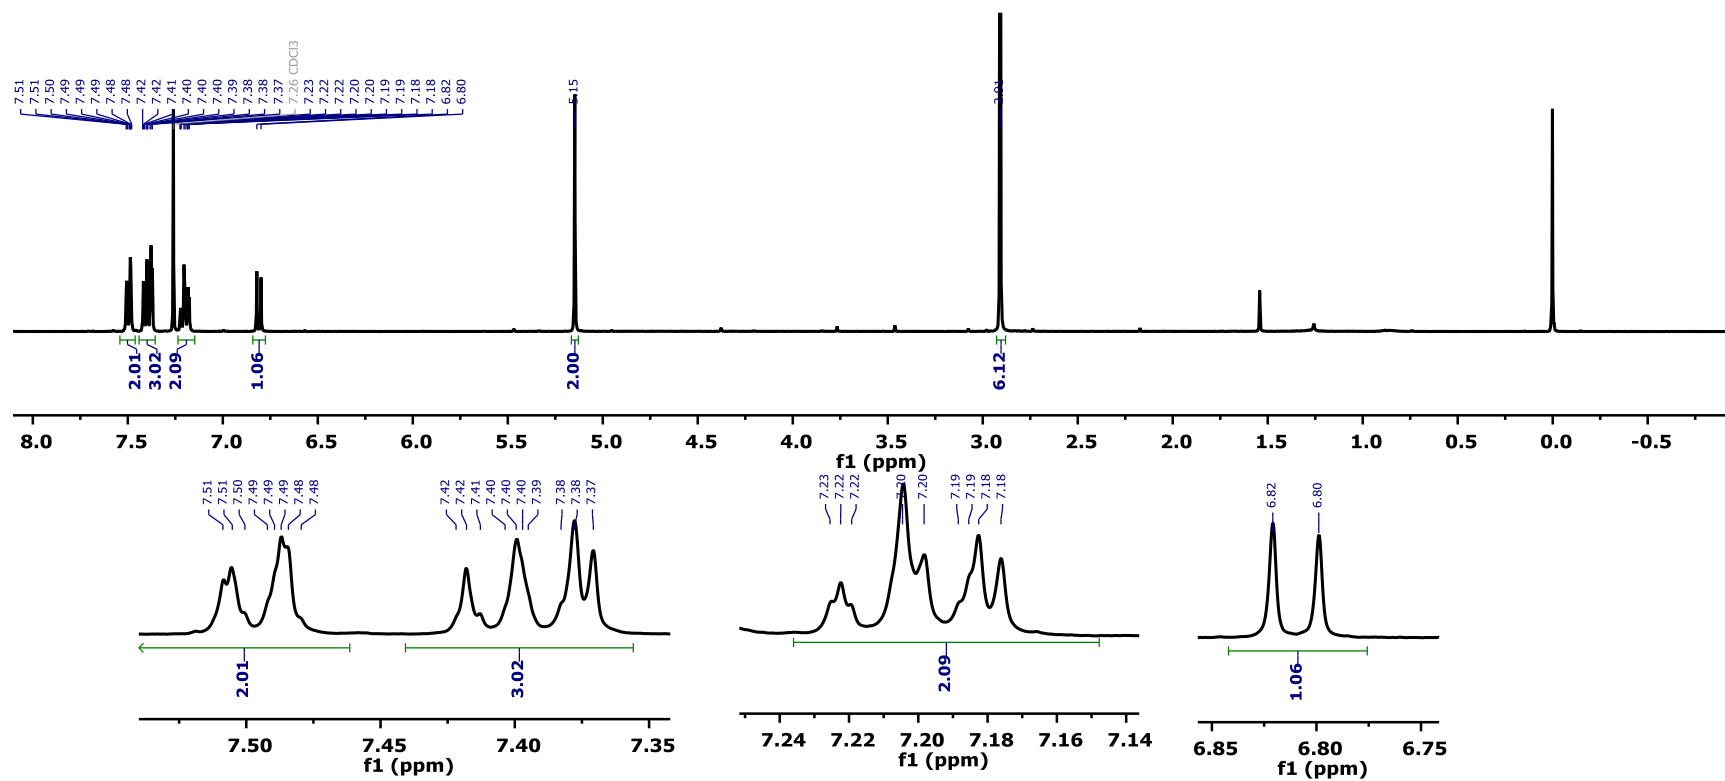

$^{13}\text{C}\{\text{H}\}$  NMR ( $\text{CDCl}_3$ , 101 MHz)

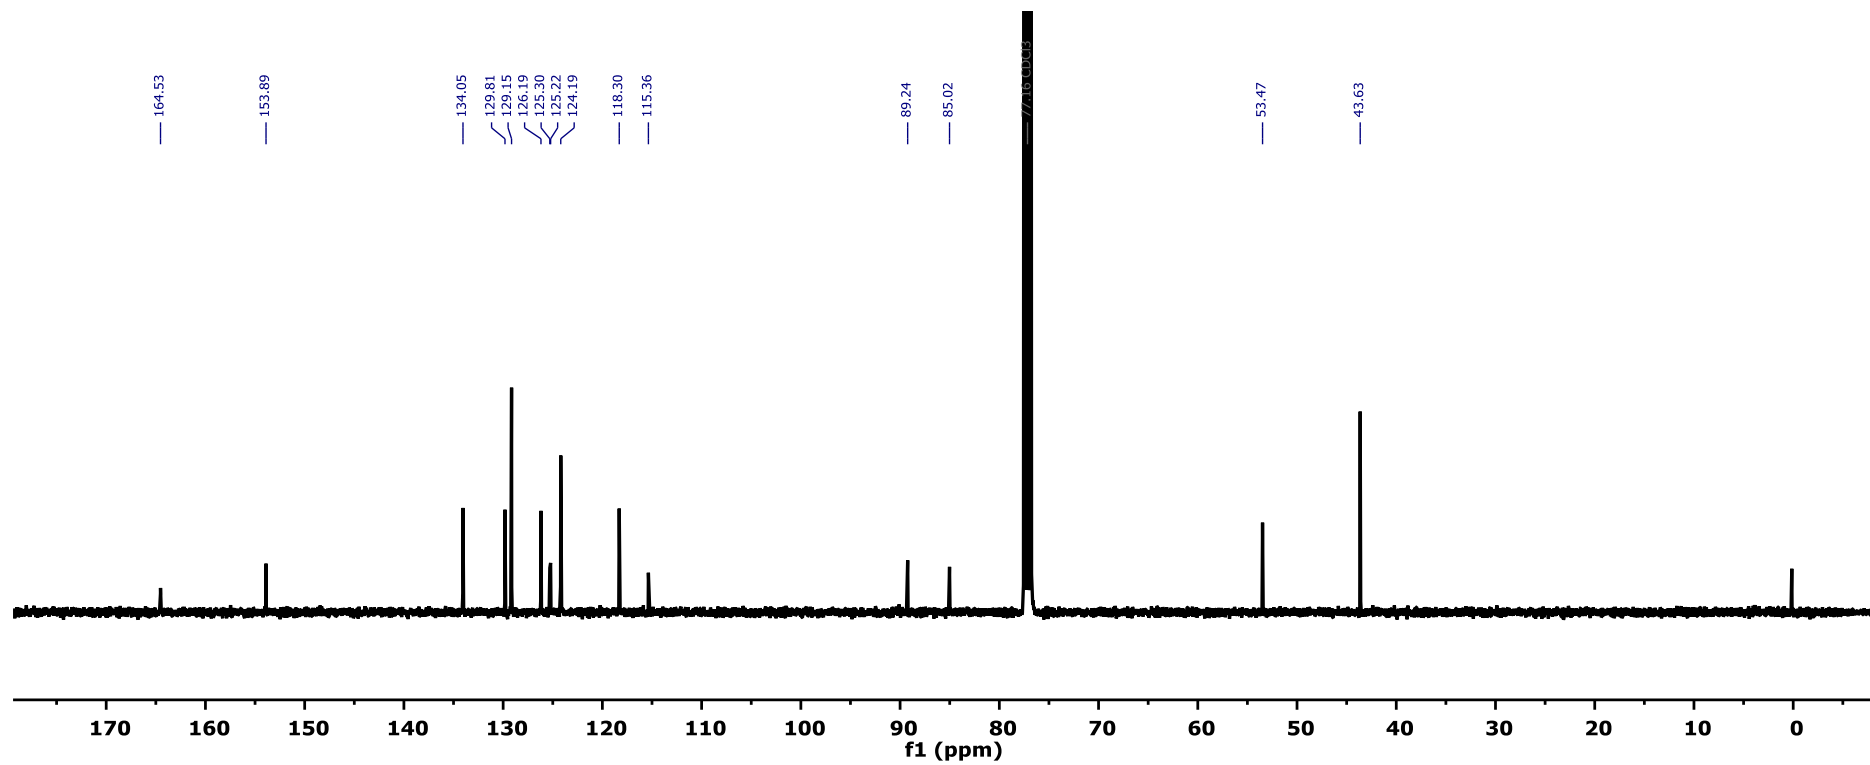

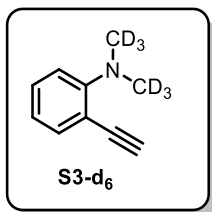

<sup>1</sup>H NMR (400 MHz, CDCl<sub>3</sub>)

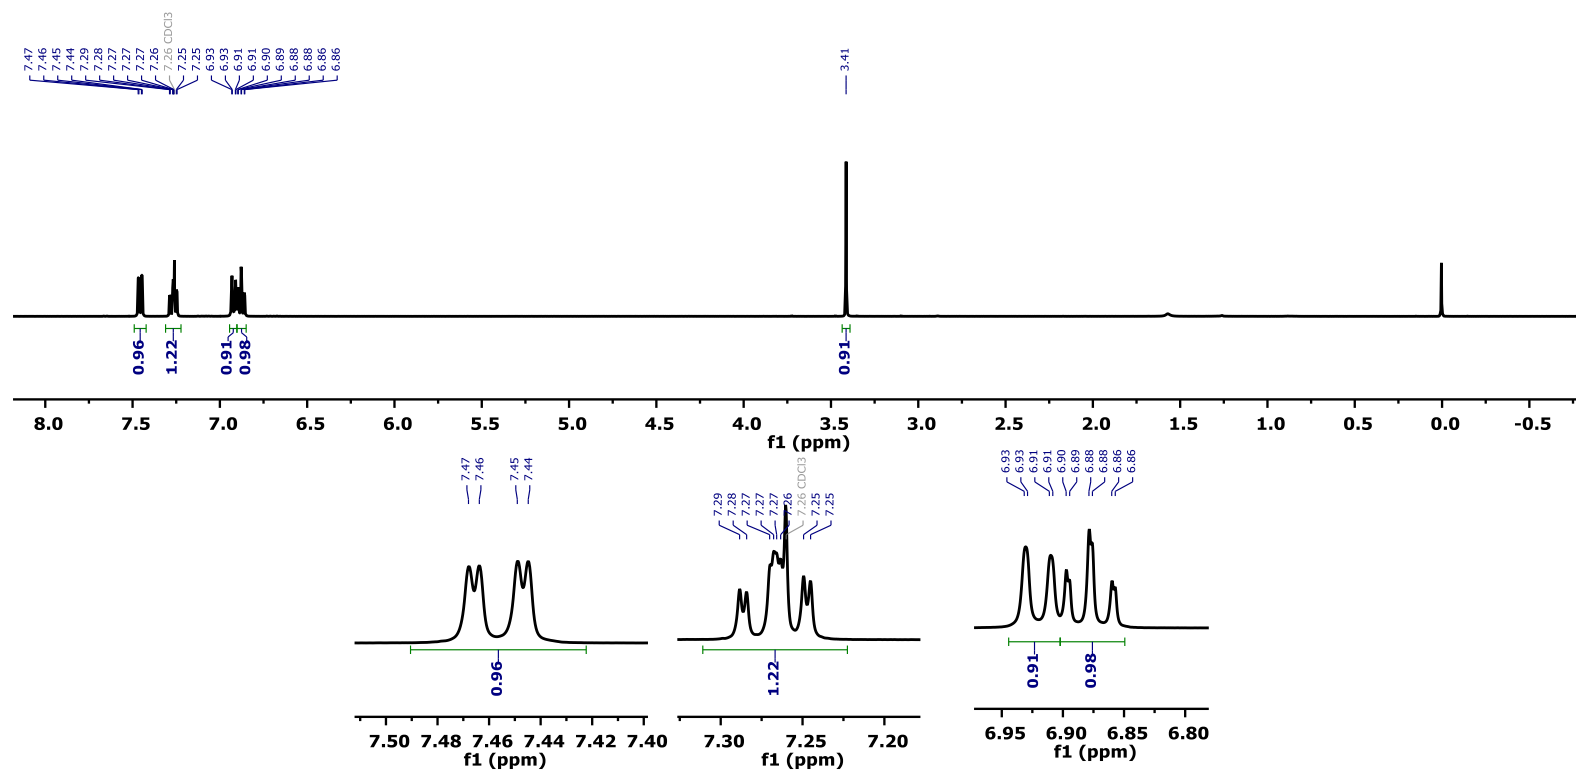

$^{13}\text{C}\{\text{H}\}$  NMR ( $\text{CDCl}_3$ , 101 MHz)

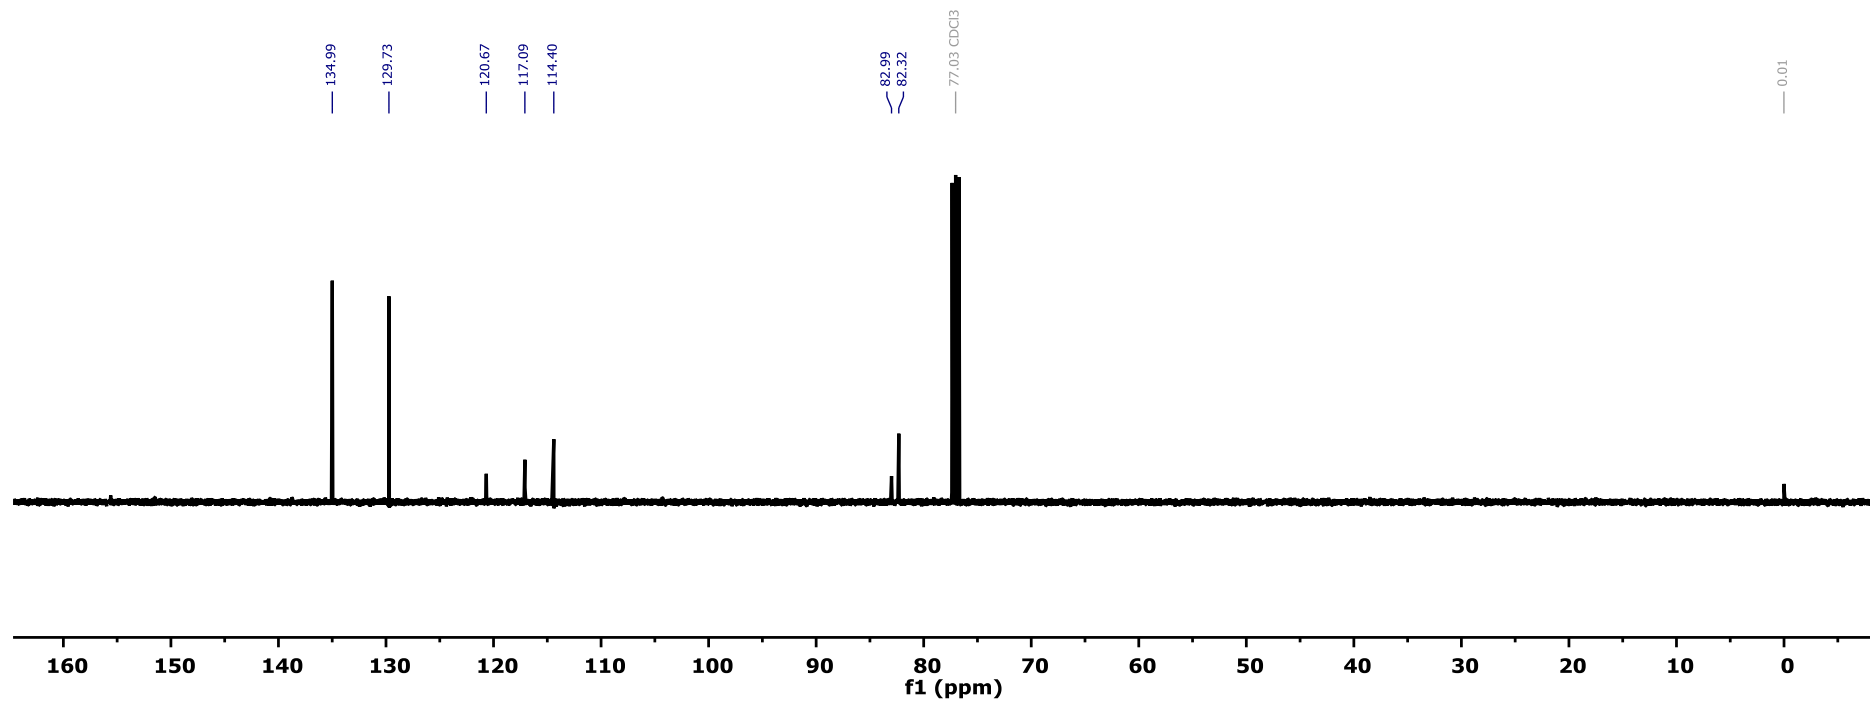

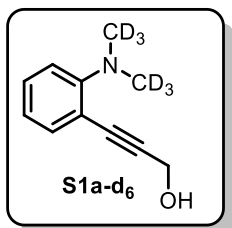

<sup>1</sup>H NMR (400 MHz, CDCl<sub>3</sub>)

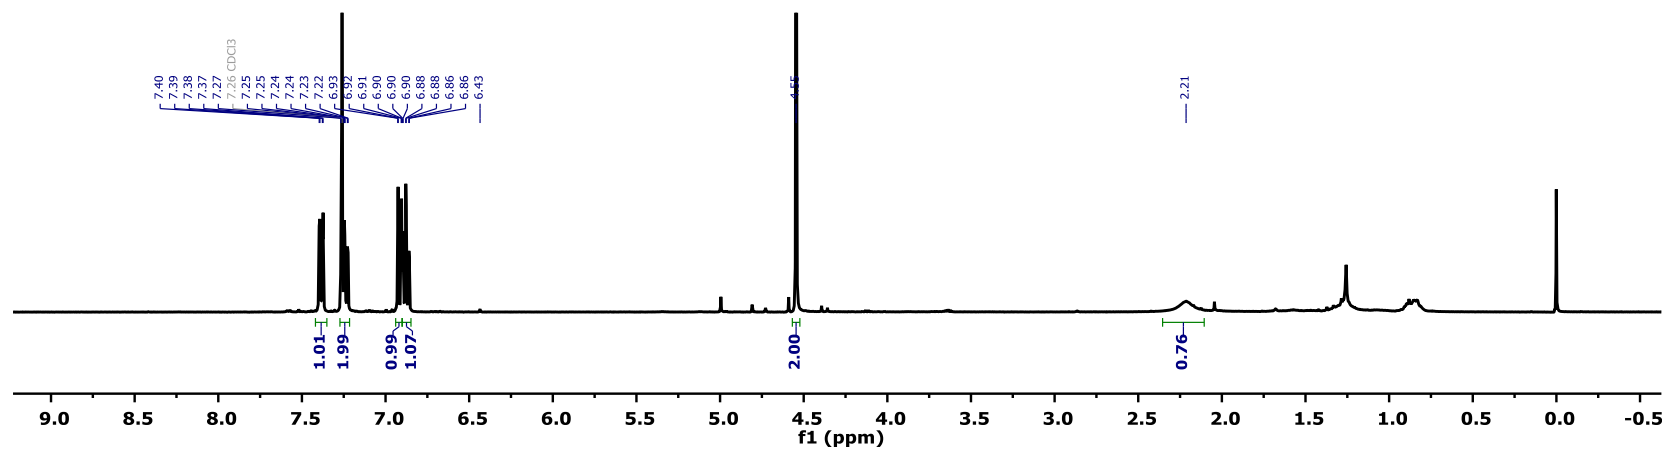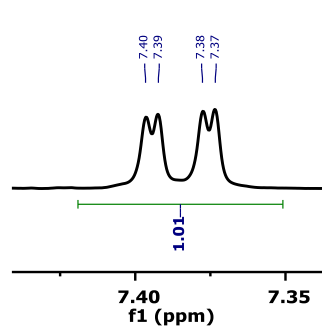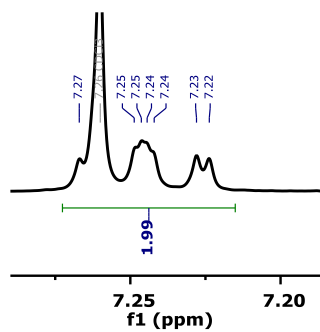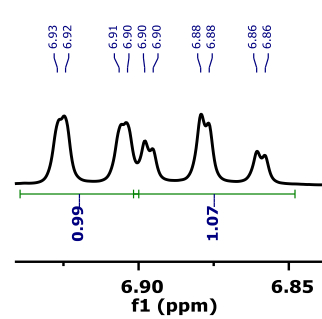



$^{13}\text{C}\{\text{H}\}$  NMR ( $\text{CDCl}_3$ , 101 MHz)

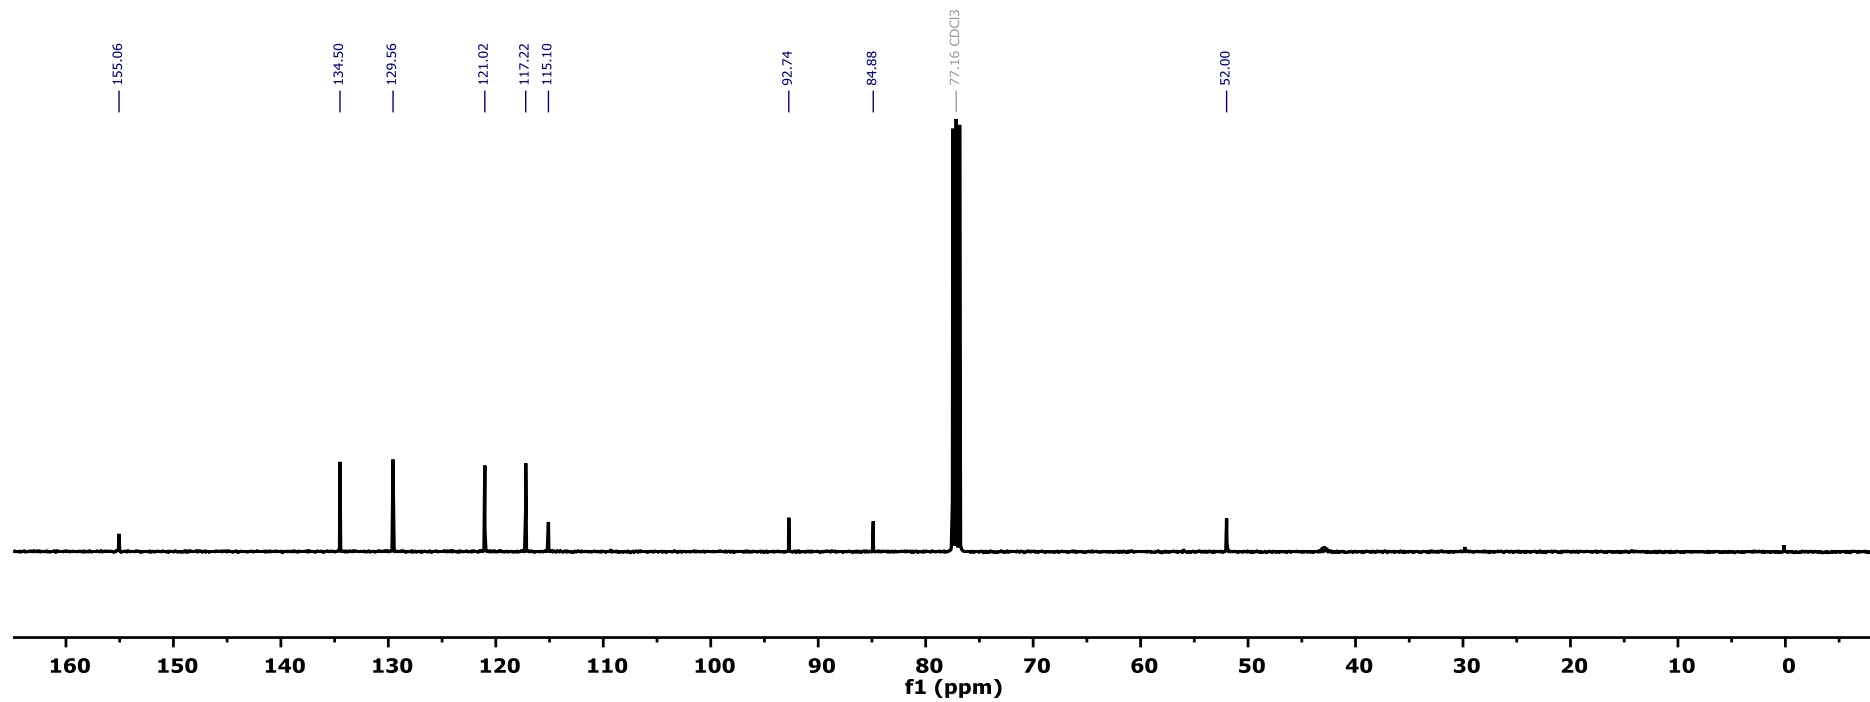

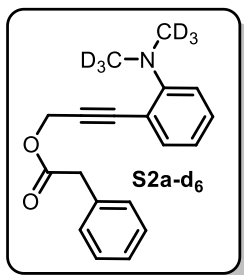

<sup>1</sup>H NMR (400 MHz, CDCl<sub>3</sub>)

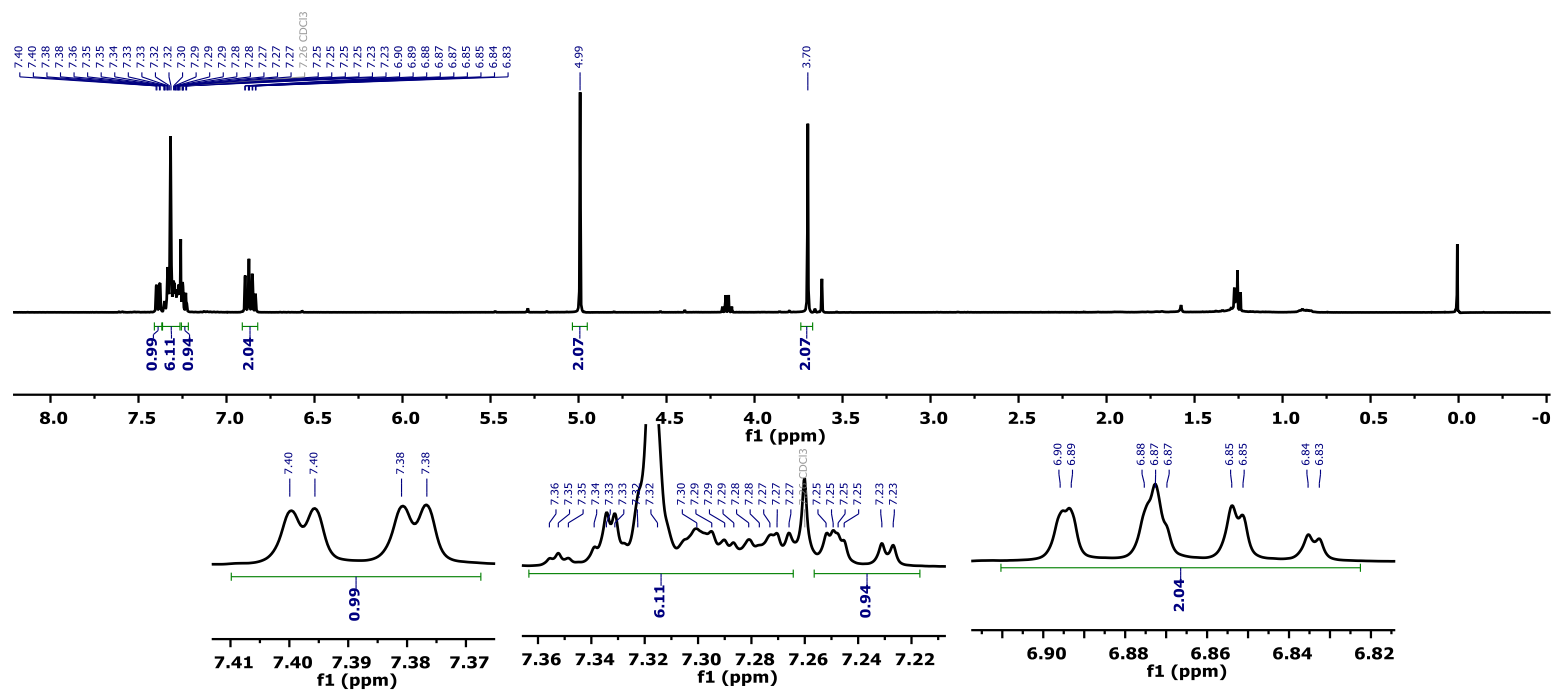

$^{13}\text{C}\{\text{H}\}$  NMR ( $\text{CDCl}_3$ , 101 MHz)

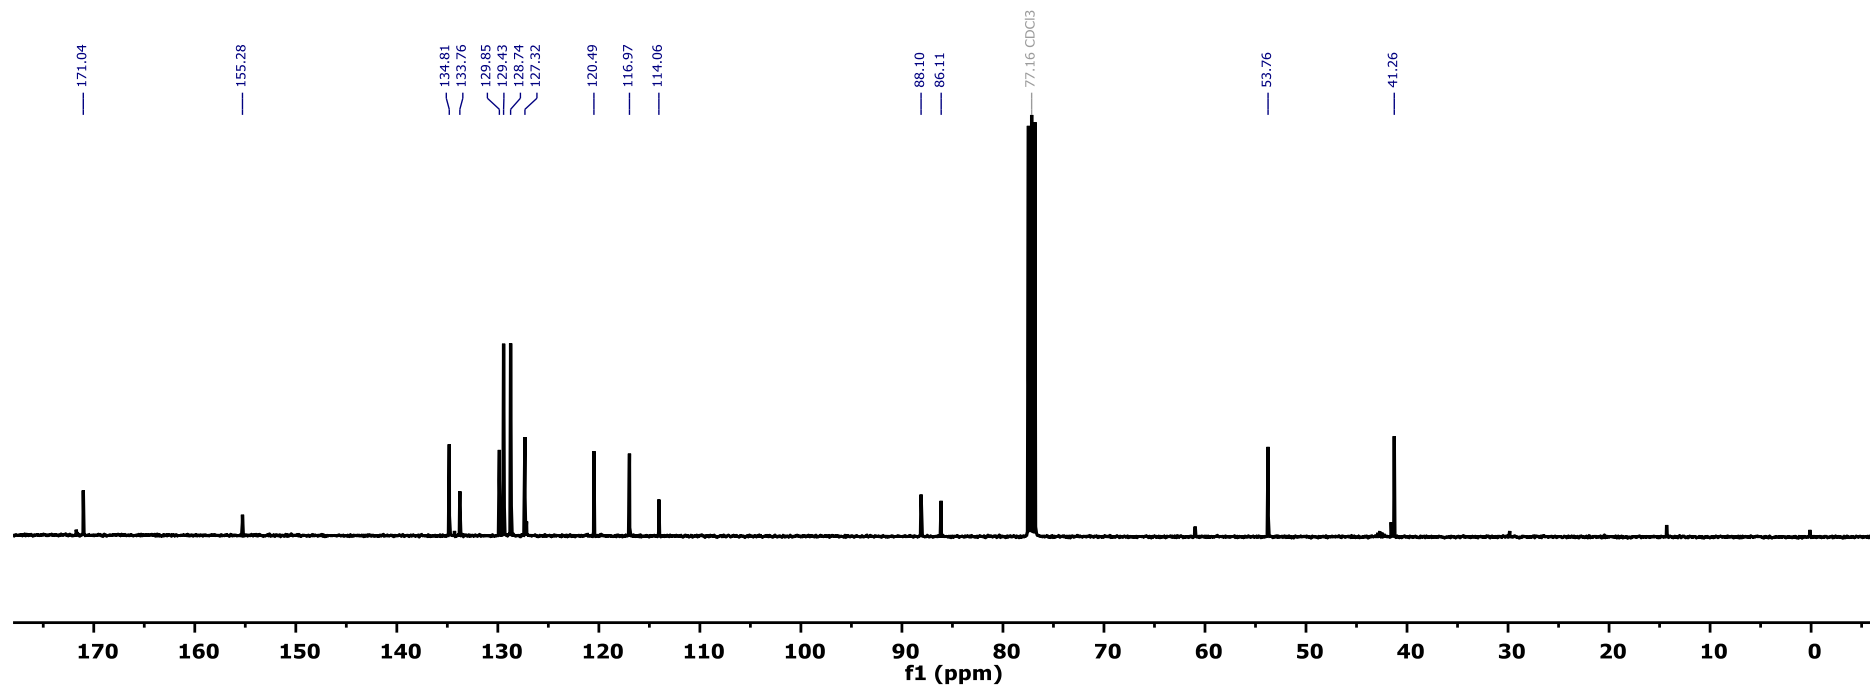

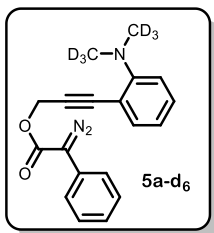

<sup>1</sup>H NMR (400 MHz, CDCl<sub>3</sub>)

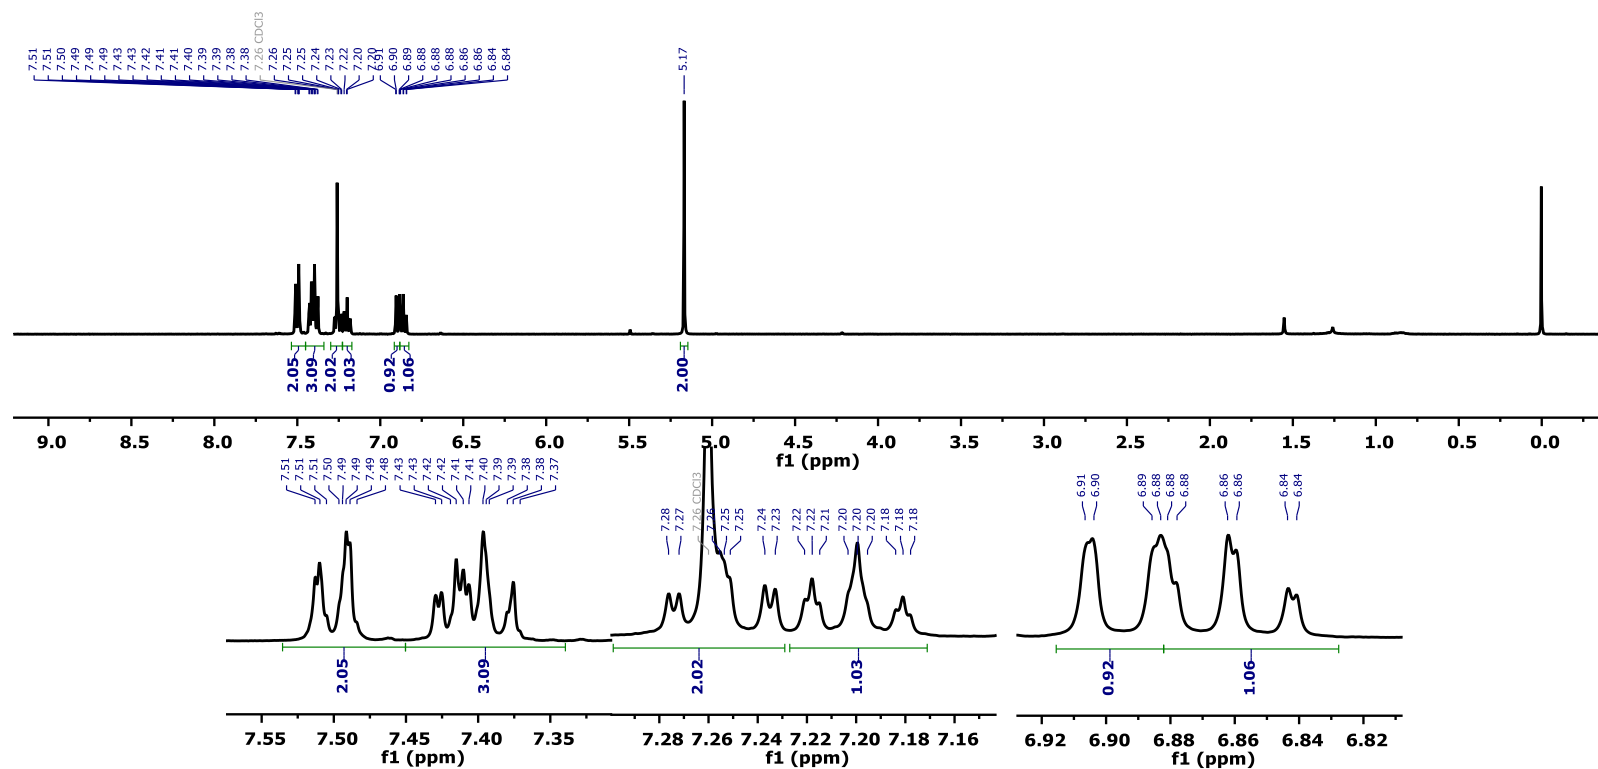

$^{13}\text{C}\{\text{H}\}$  NMR ( $\text{CDCl}_3$ , 101 MHz)

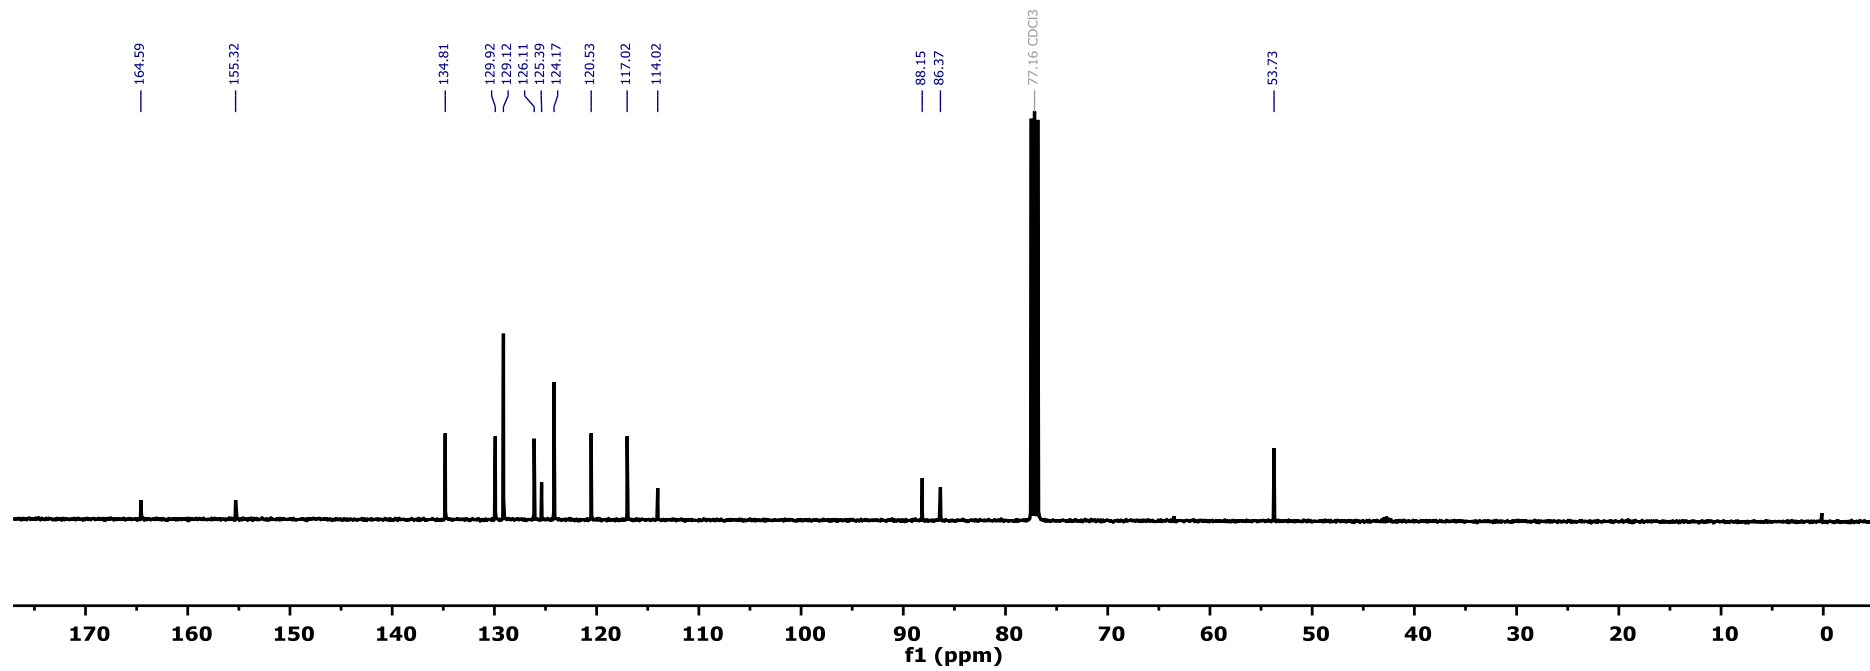

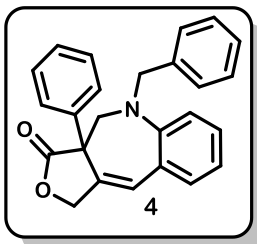

<sup>1</sup>H NMR (400 MHz, CDCl<sub>3</sub>)

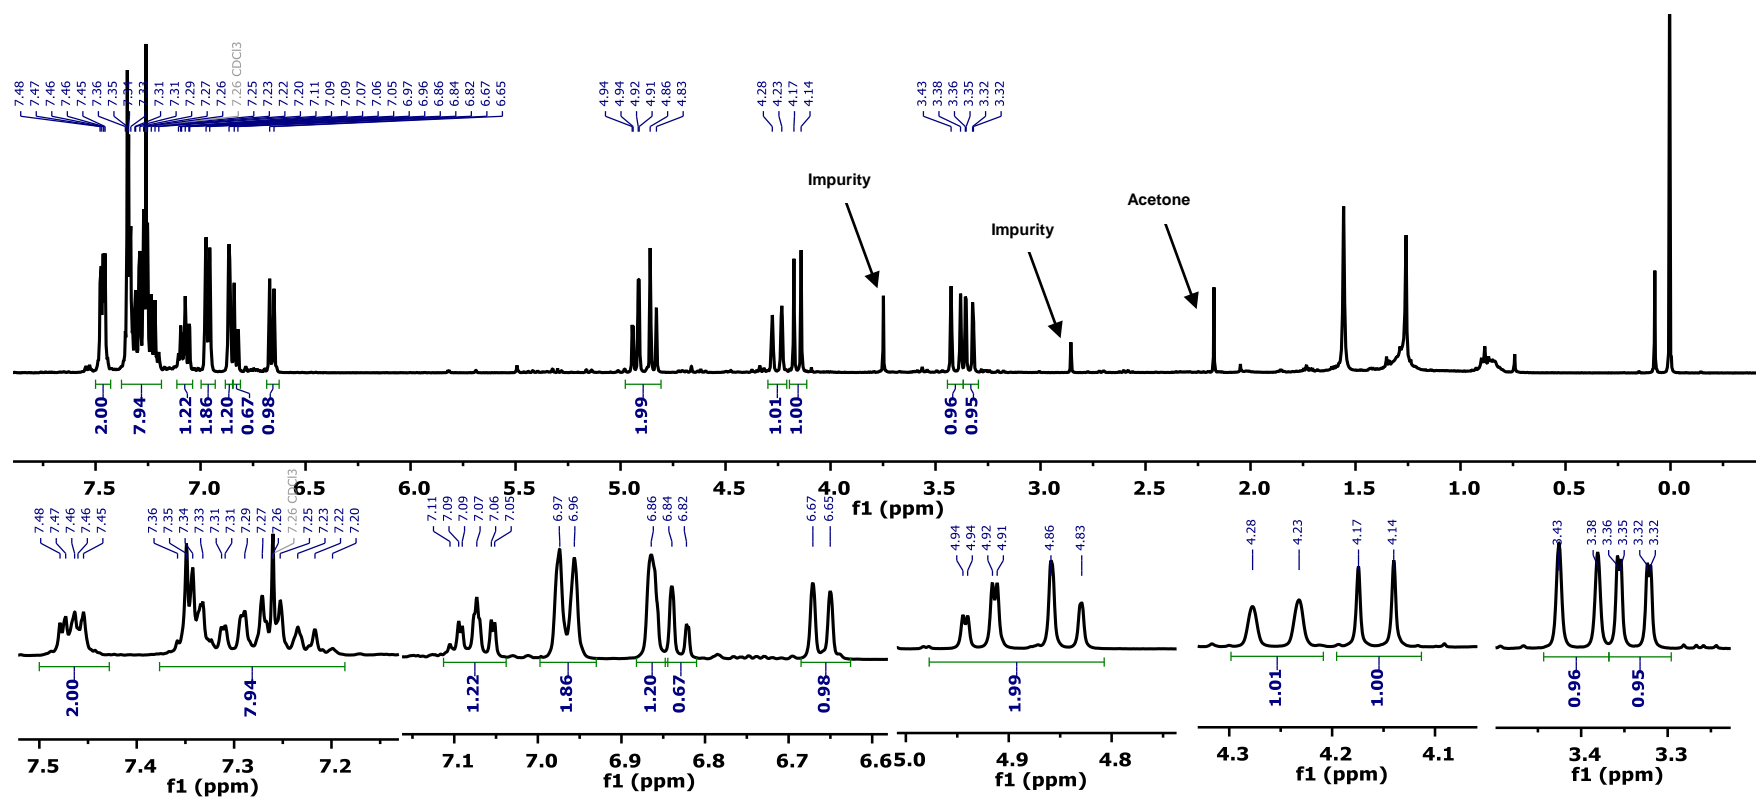

$^{13}\text{C}\{\text{H}\}$  NMR ( $\text{CDCl}_3$ , 101 MHz)

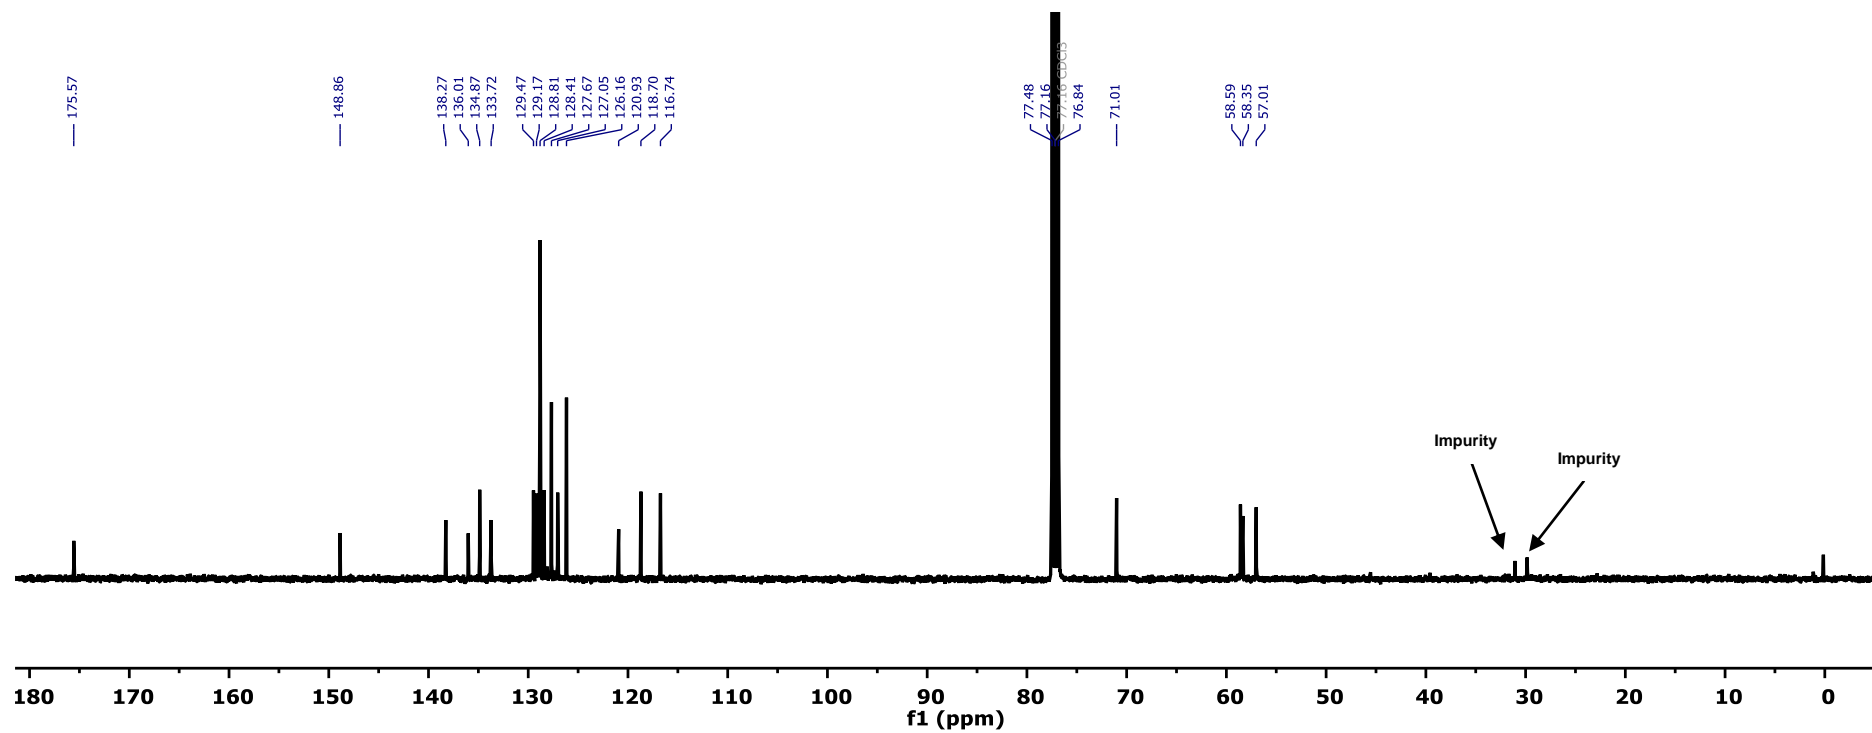

2D NMR HSQC (CDCl<sub>3</sub>)

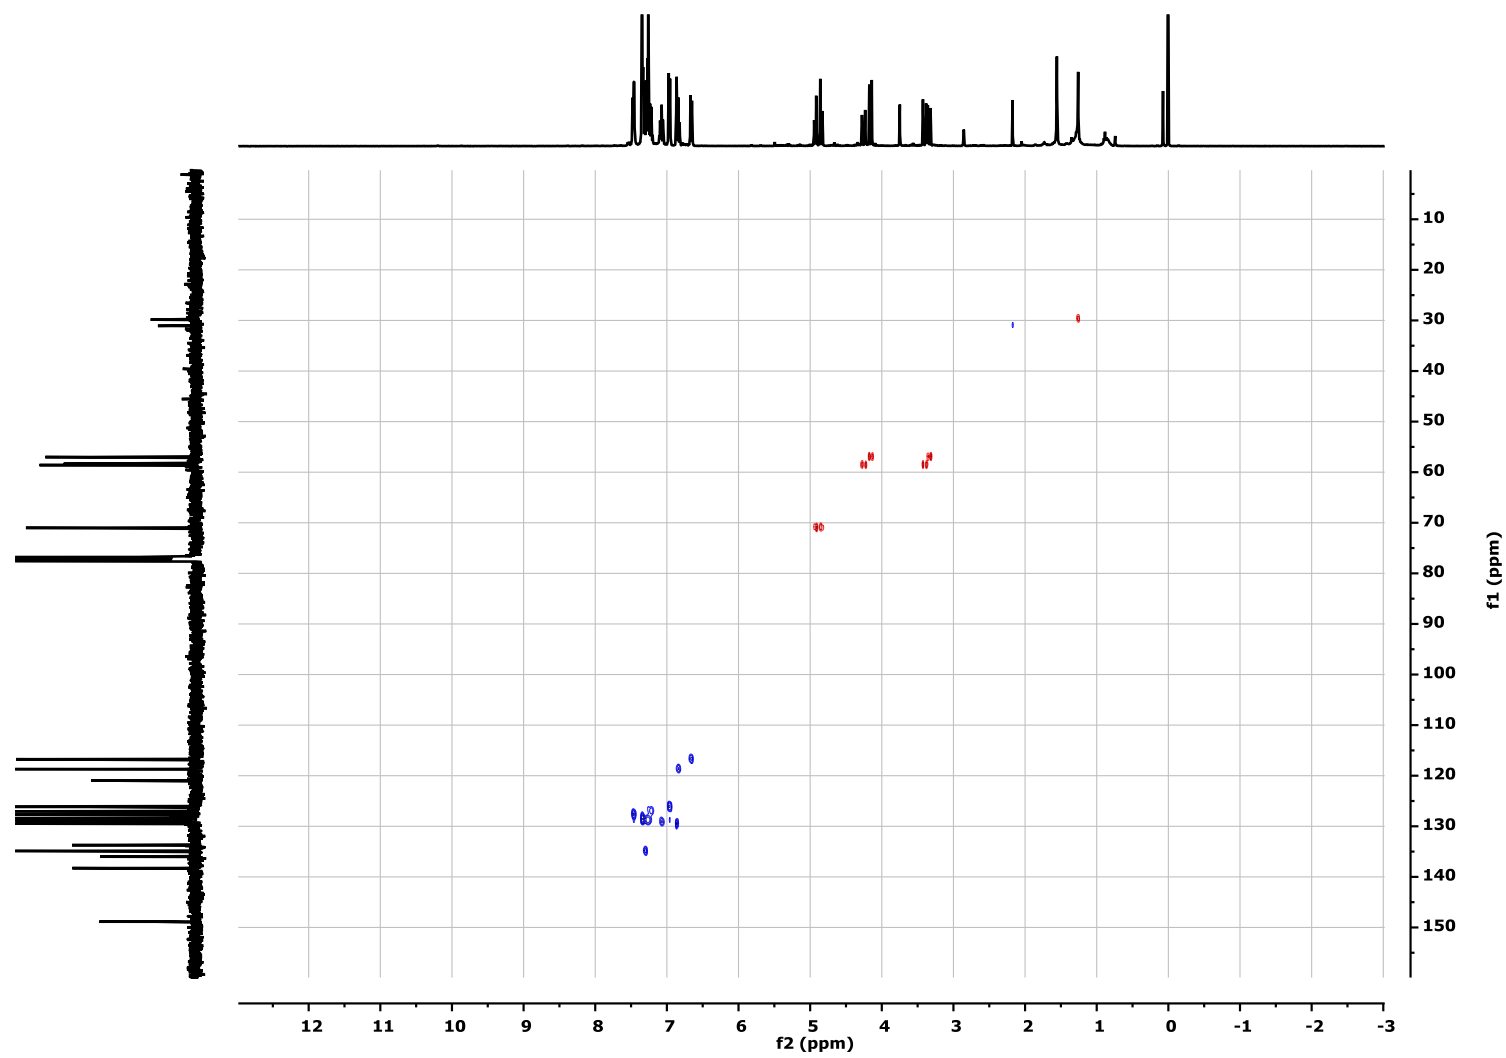



2D NMR COSY (CDCl<sub>3</sub>)

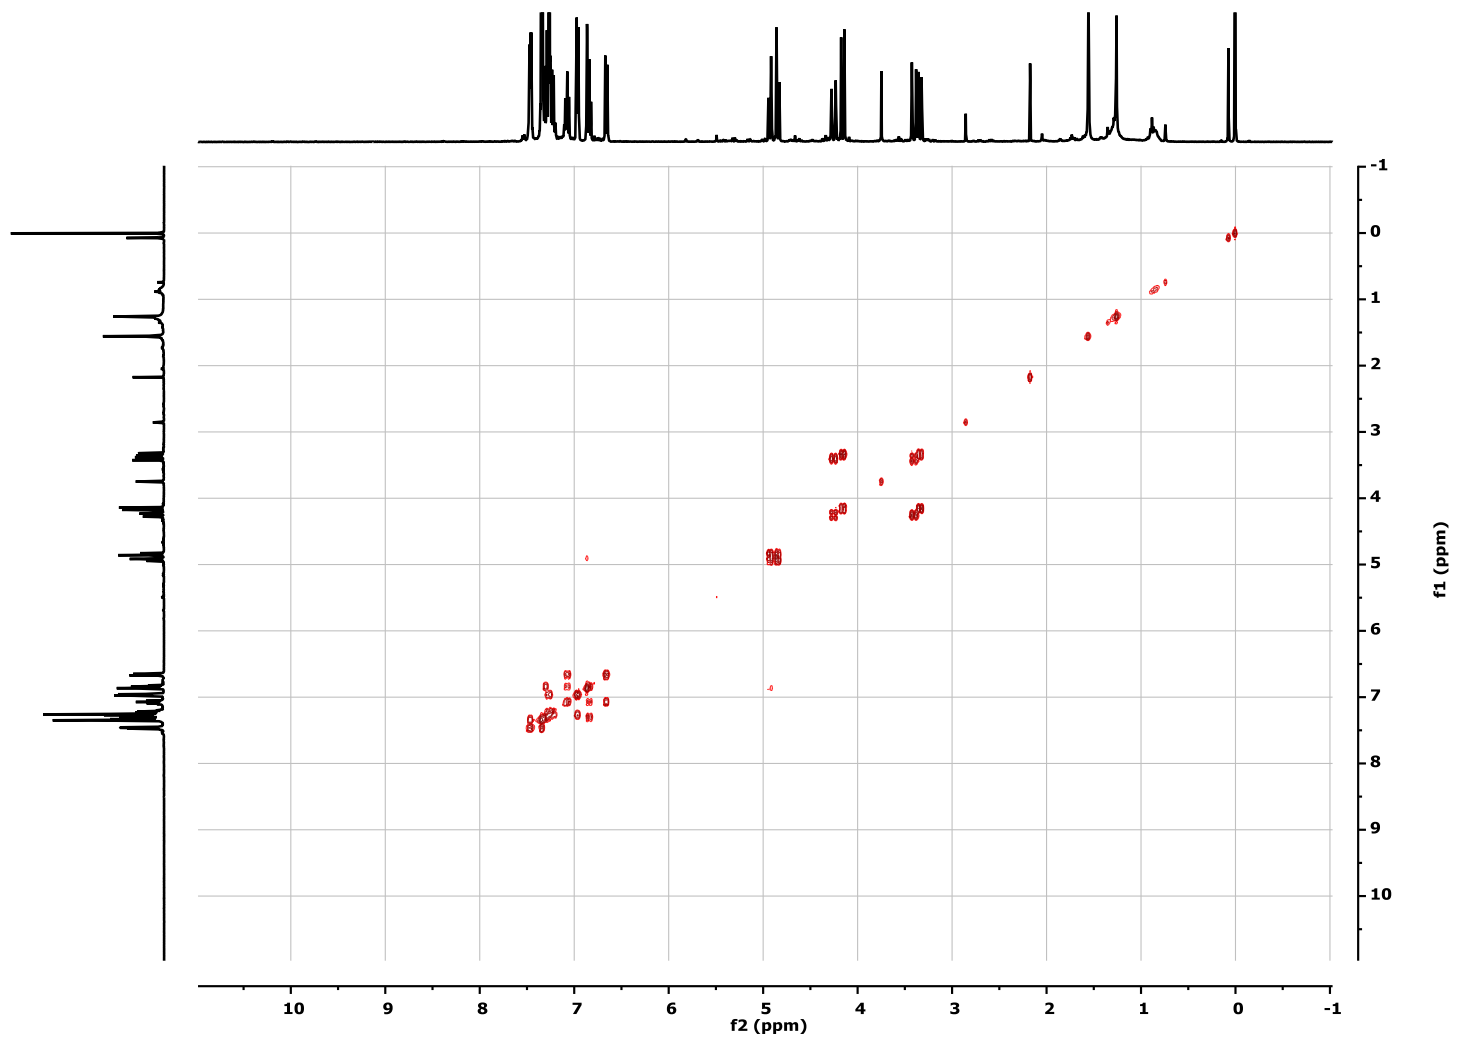

# 2D NMR HMBC (CDCl<sub>3</sub>)

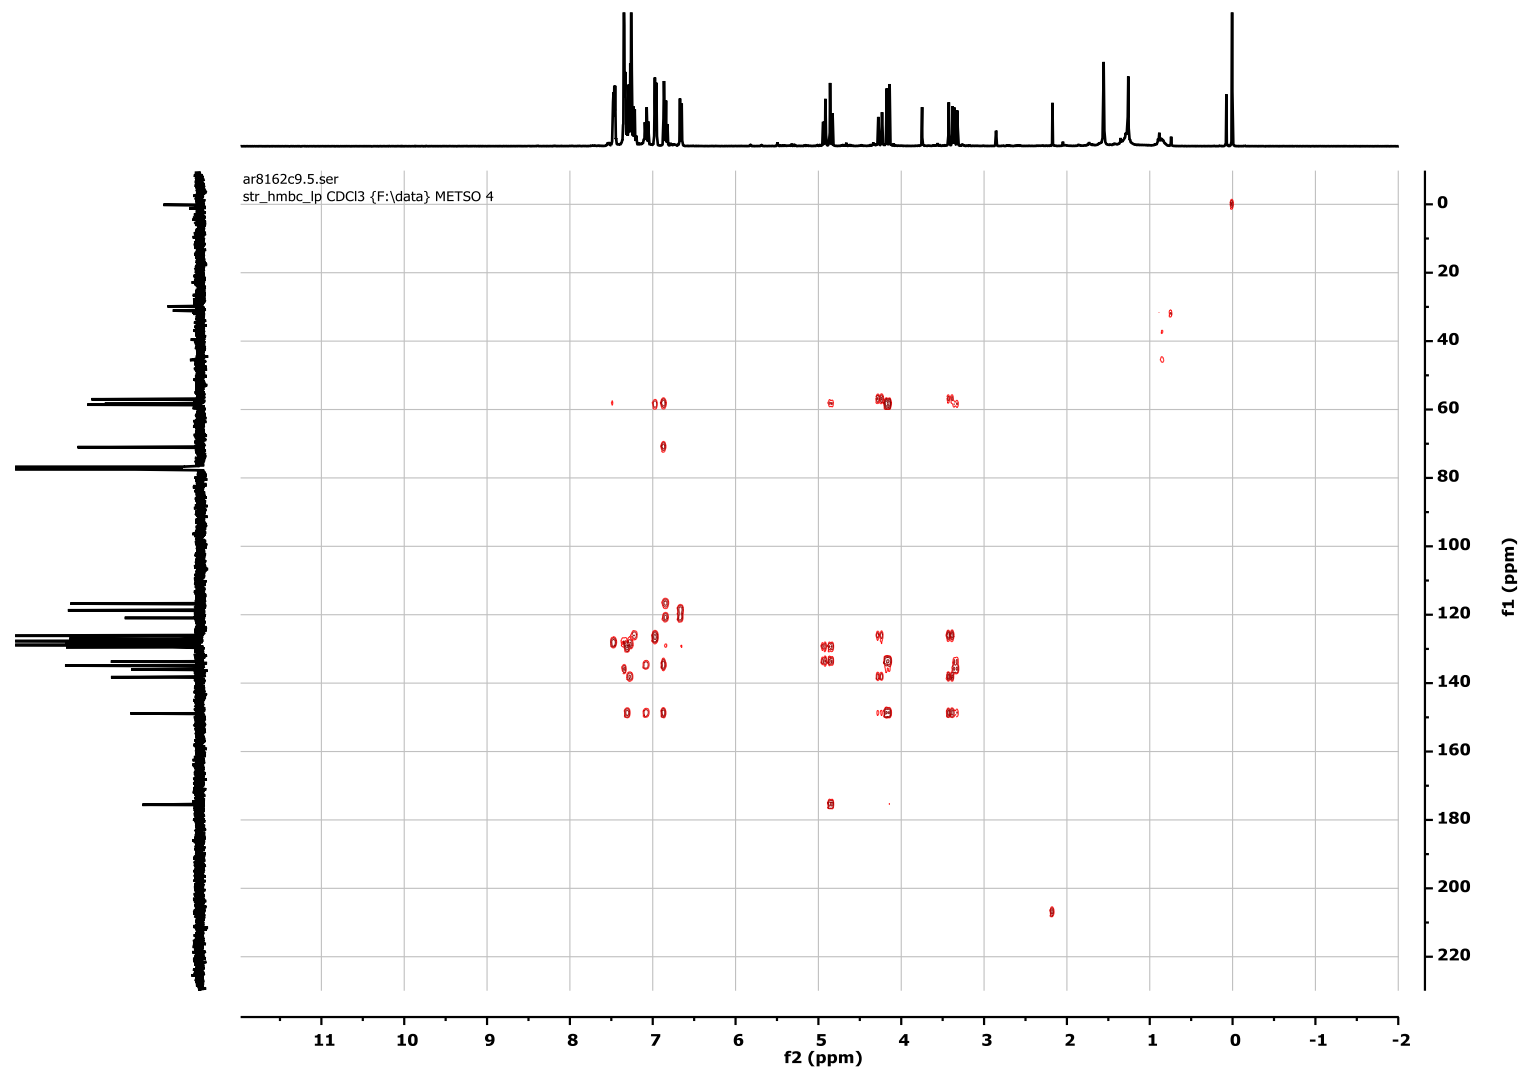

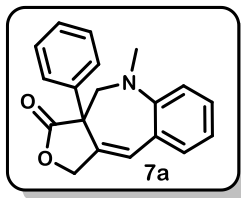

<sup>1</sup>H NMR (400 MHz, CDCl<sub>3</sub>)

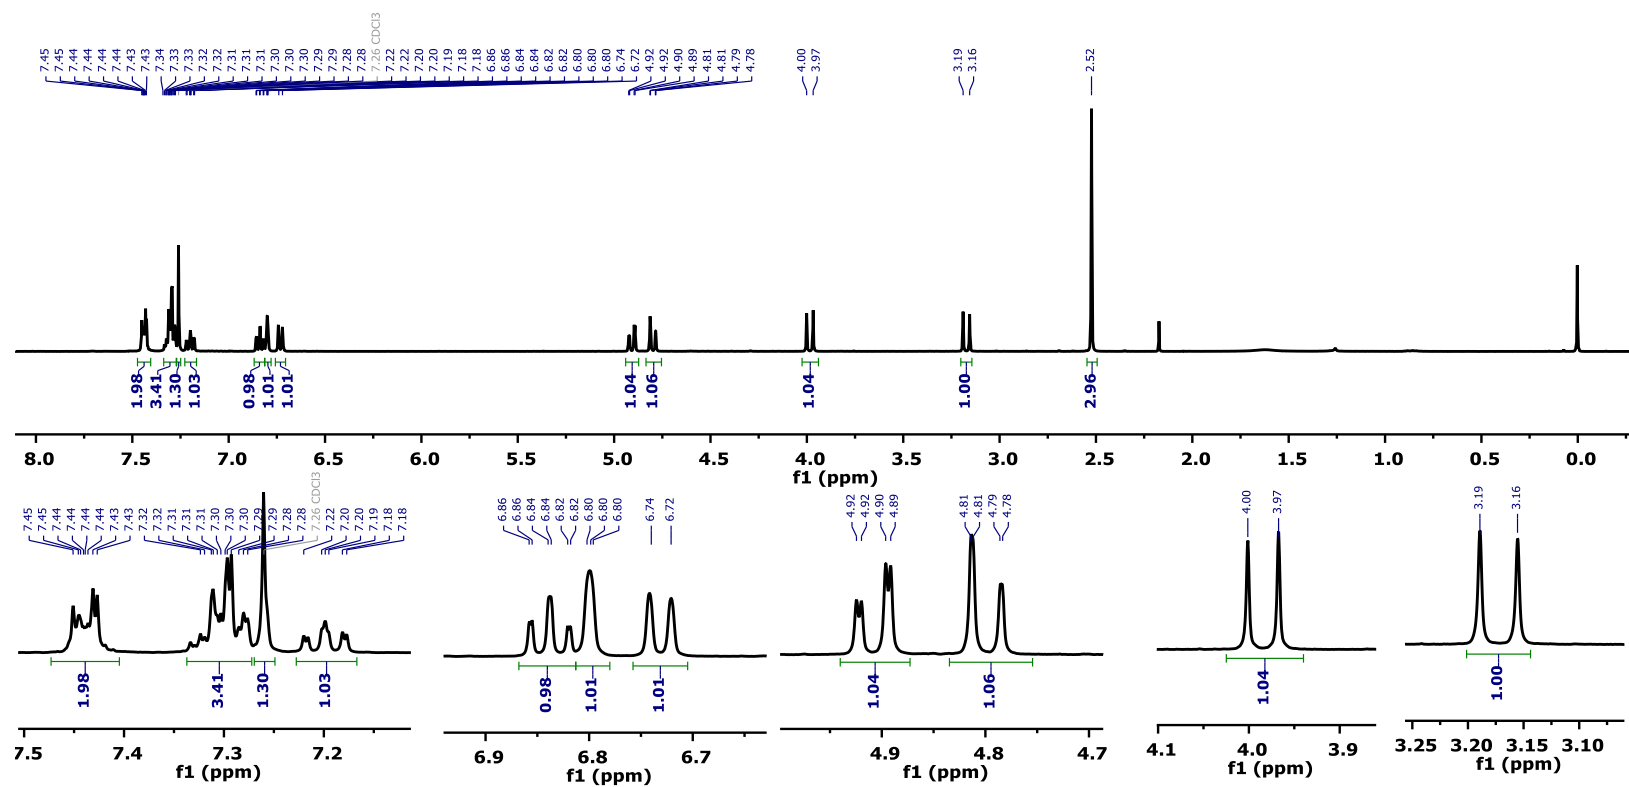

$^{13}\text{C}\{\text{H}\}$  NMR ( $\text{CDCl}_3$ , 101 MHz)

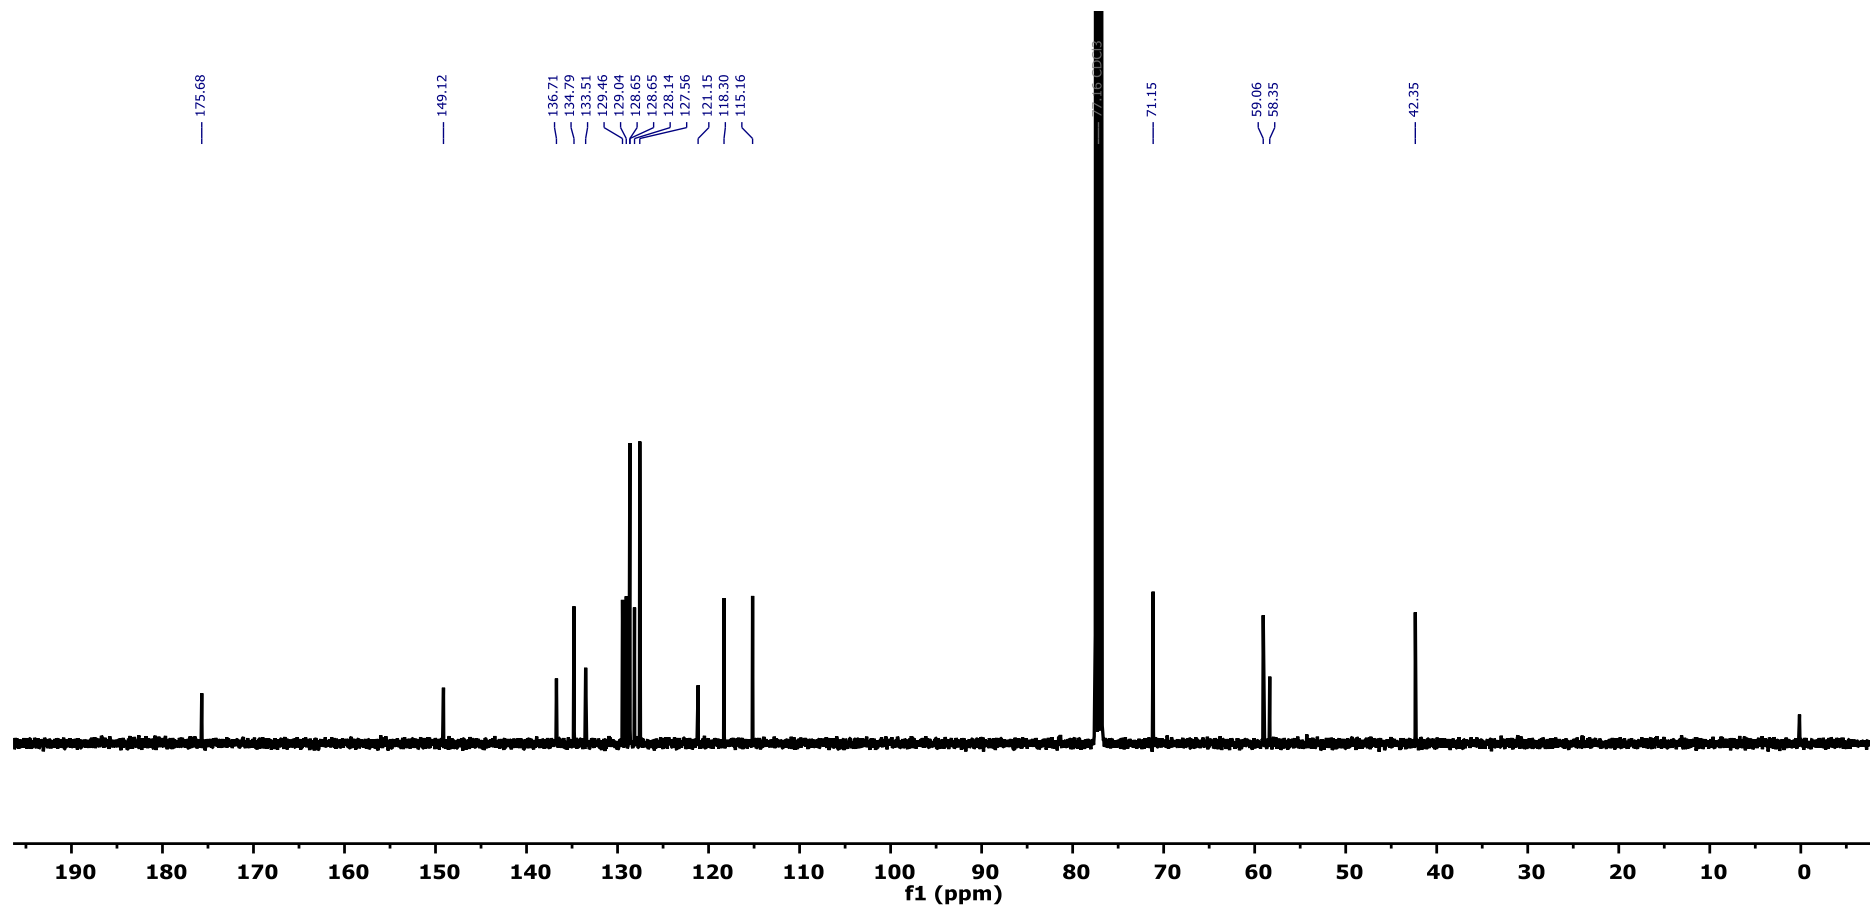

2D NMR HSQC (CDCl<sub>3</sub>)

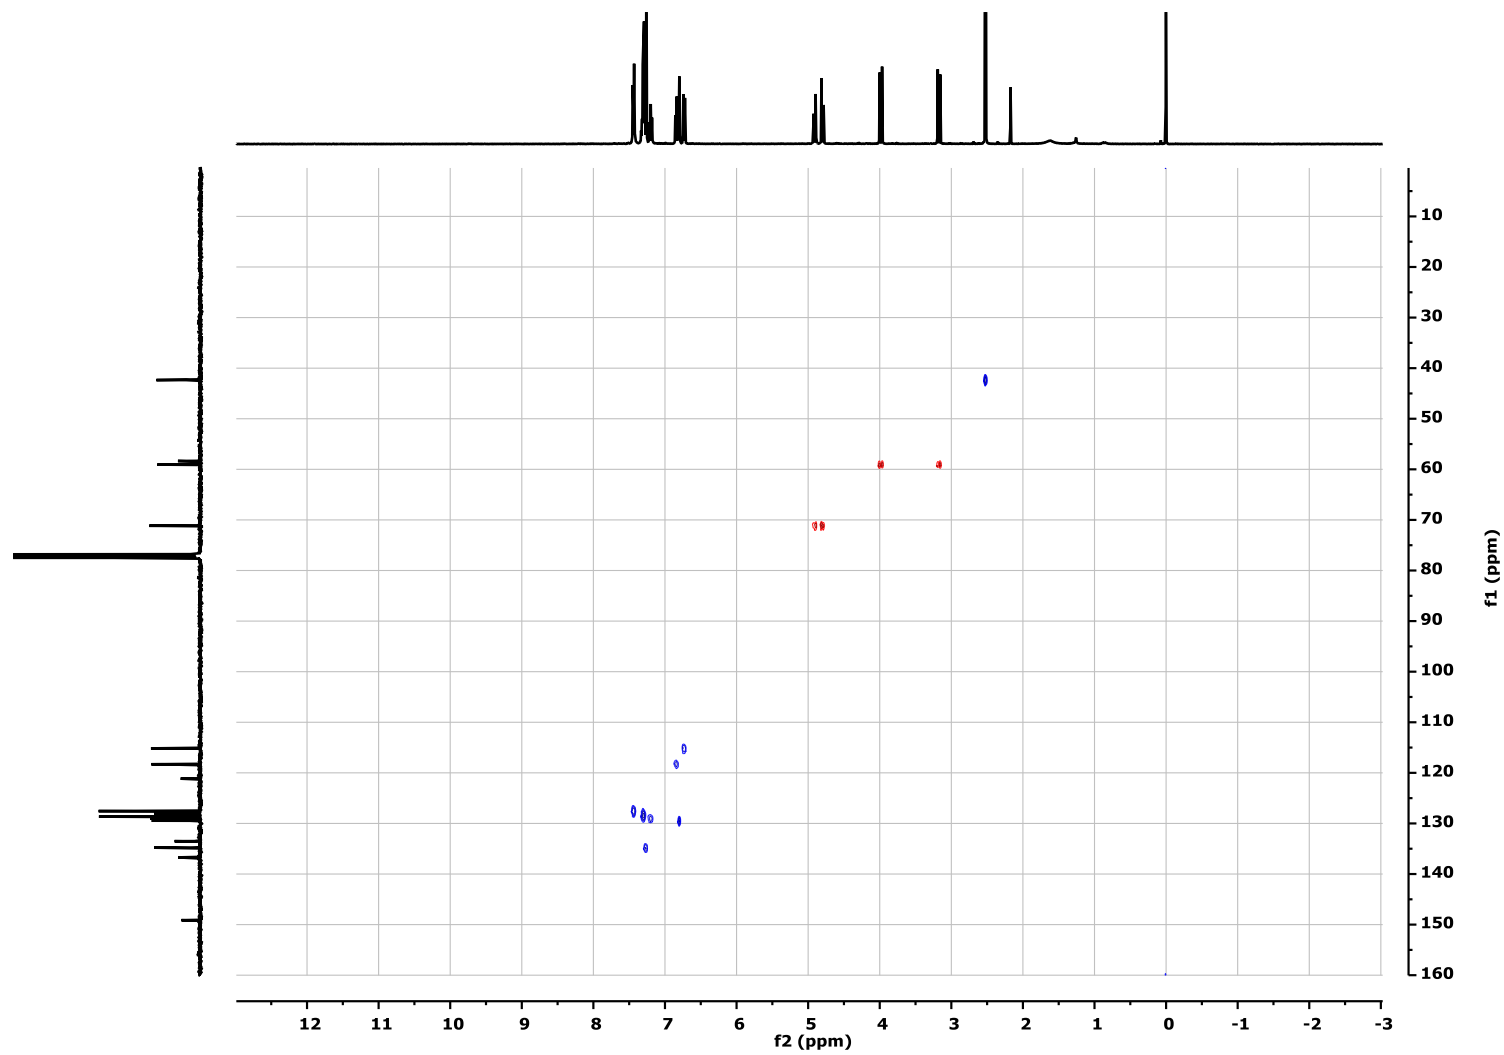

2D NMR COSY (CDCl<sub>3</sub>)

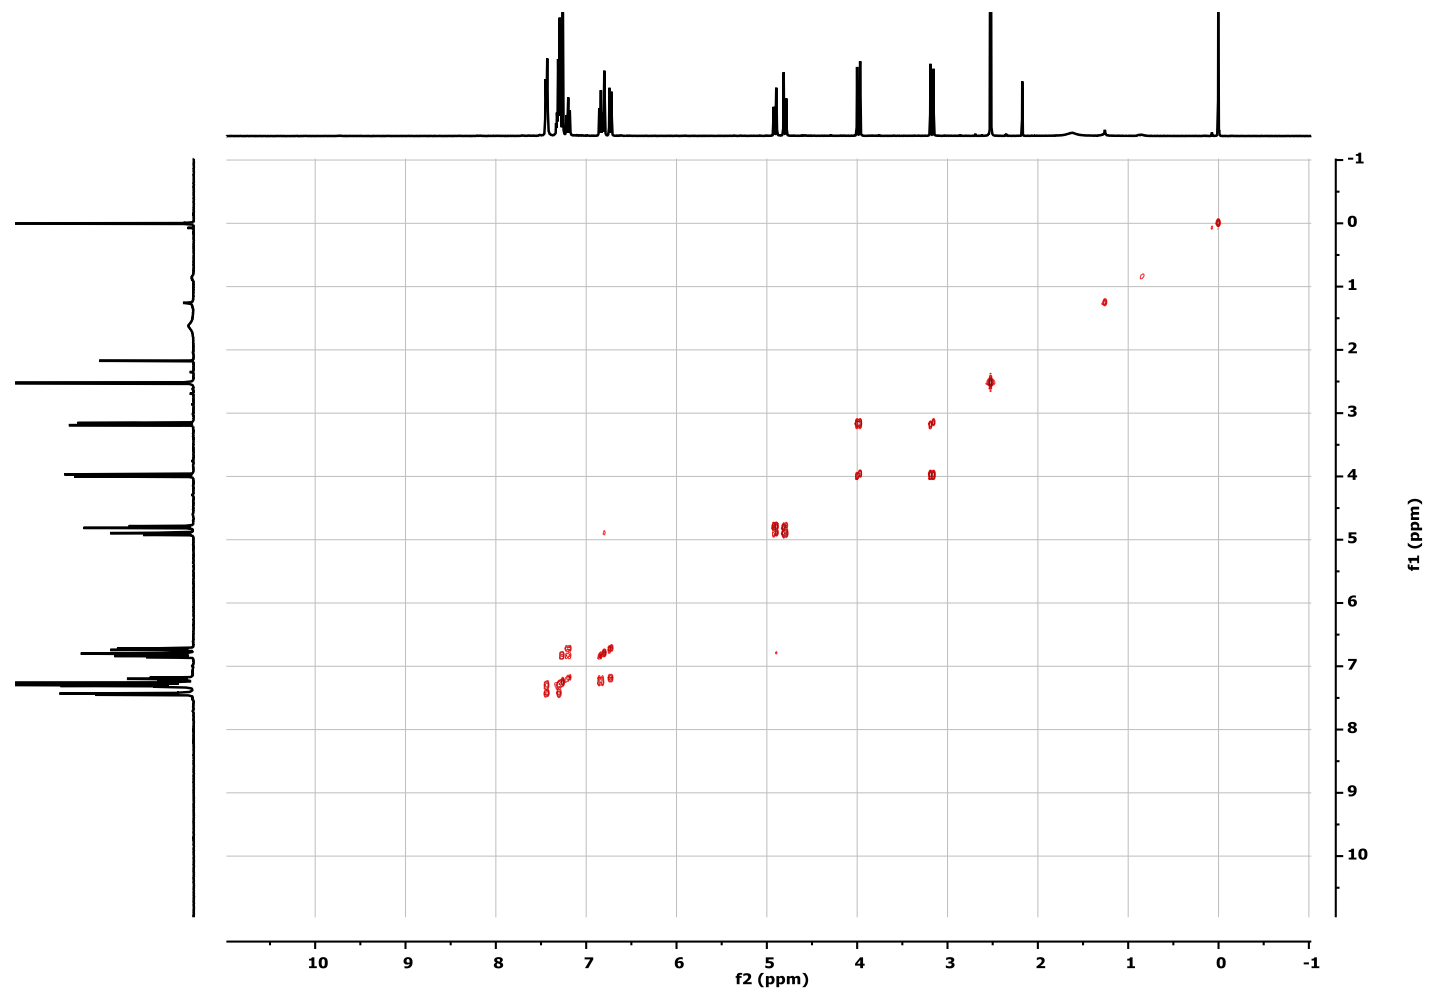

2D NMR HMBC (CDCl<sub>3</sub>)

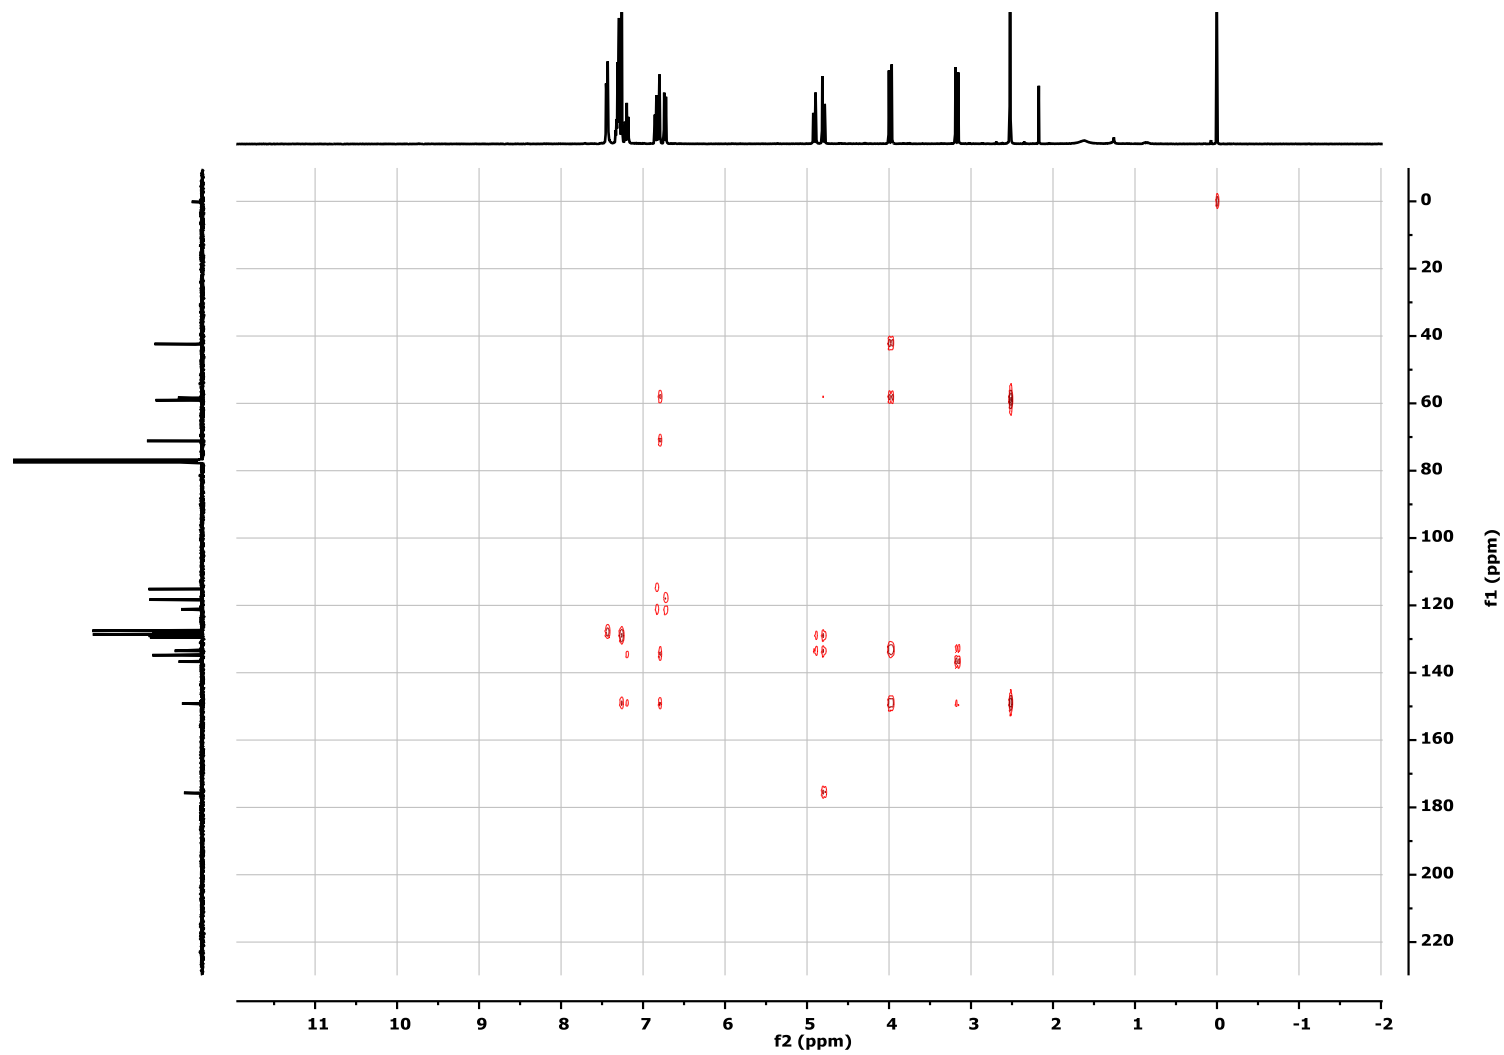

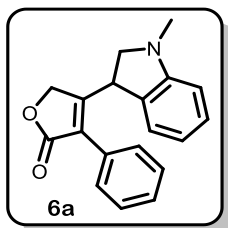

<sup>1</sup>H NMR (400 MHz, CDCl<sub>3</sub>)

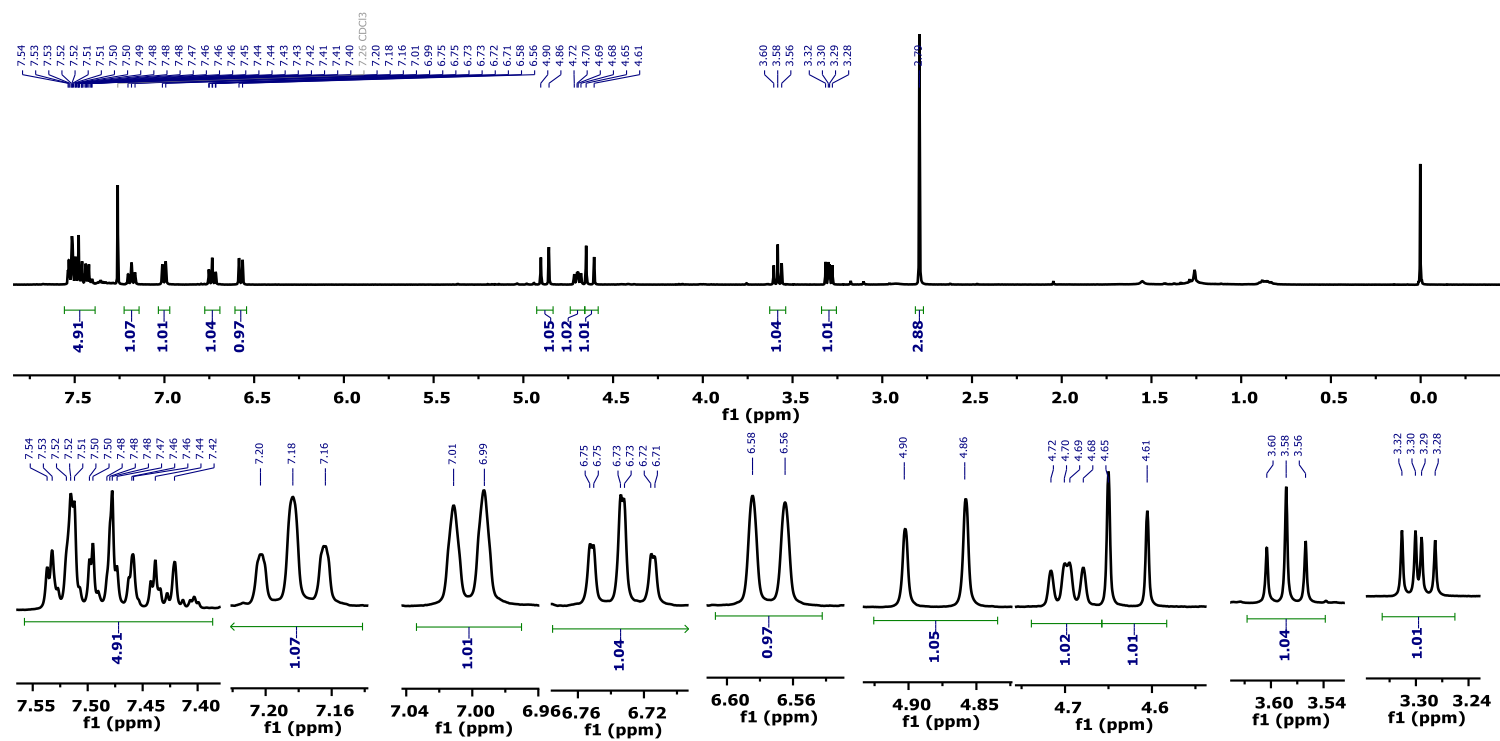



$^{13}\text{C}\{\text{H}\}$  NMR ( $\text{CDCl}_3$ , 101 MHz)

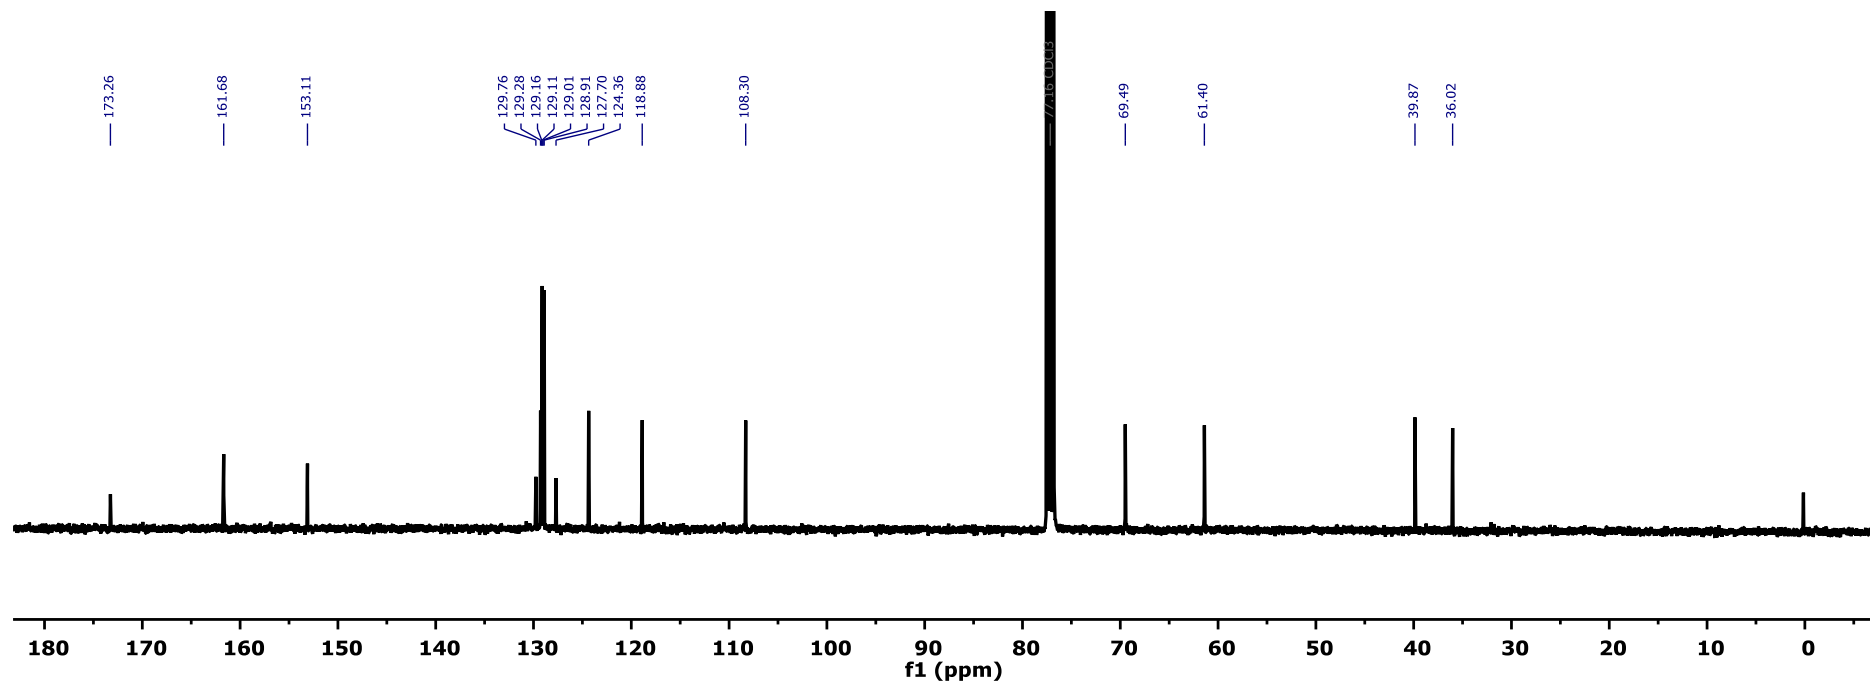

2D NMR HSQC (CDCl<sub>3</sub>)

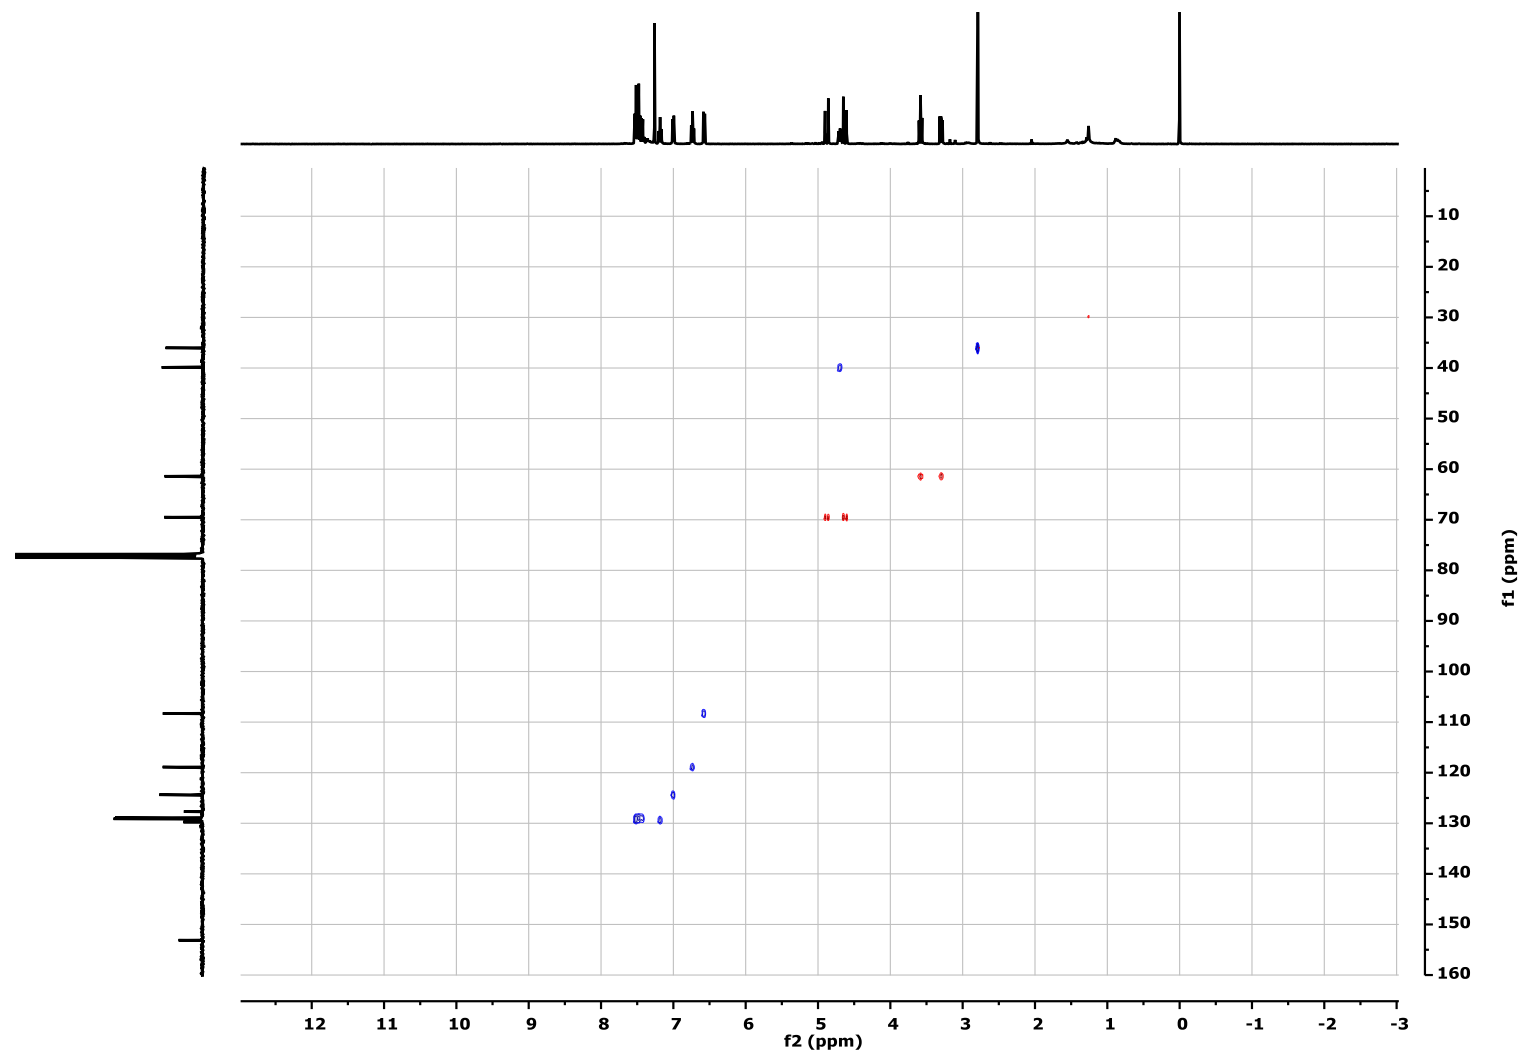

2D NMR COSY (CDCl<sub>3</sub>)

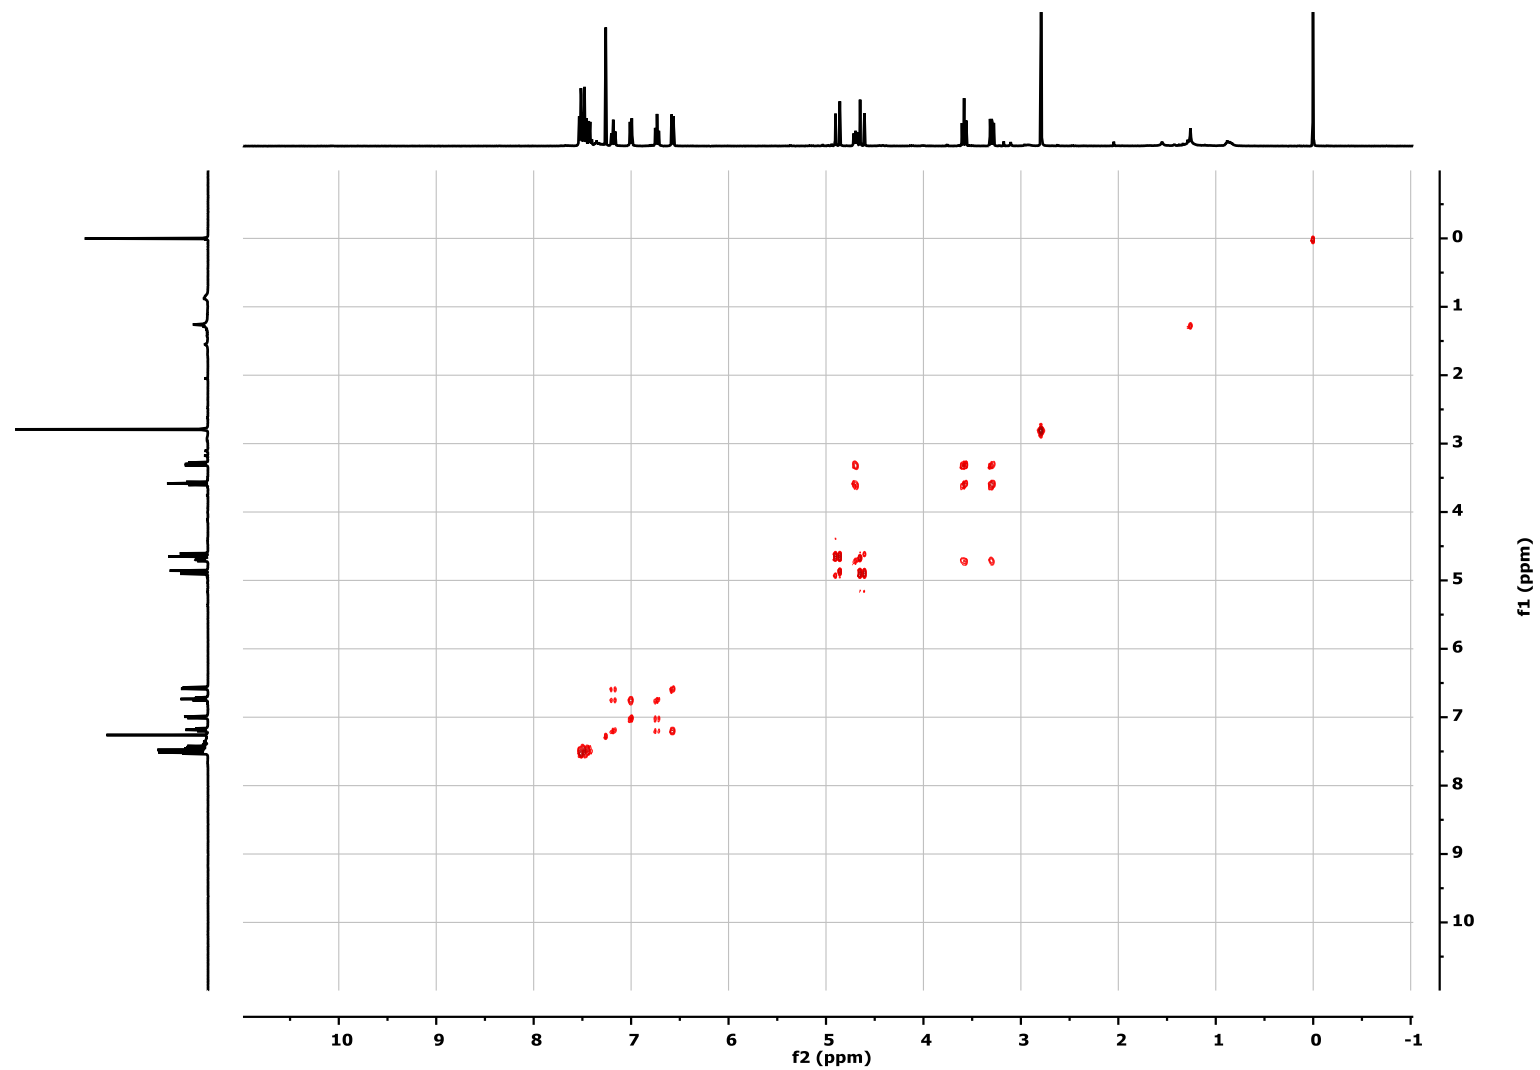

2D NMR HMBC (CDCl<sub>3</sub>)

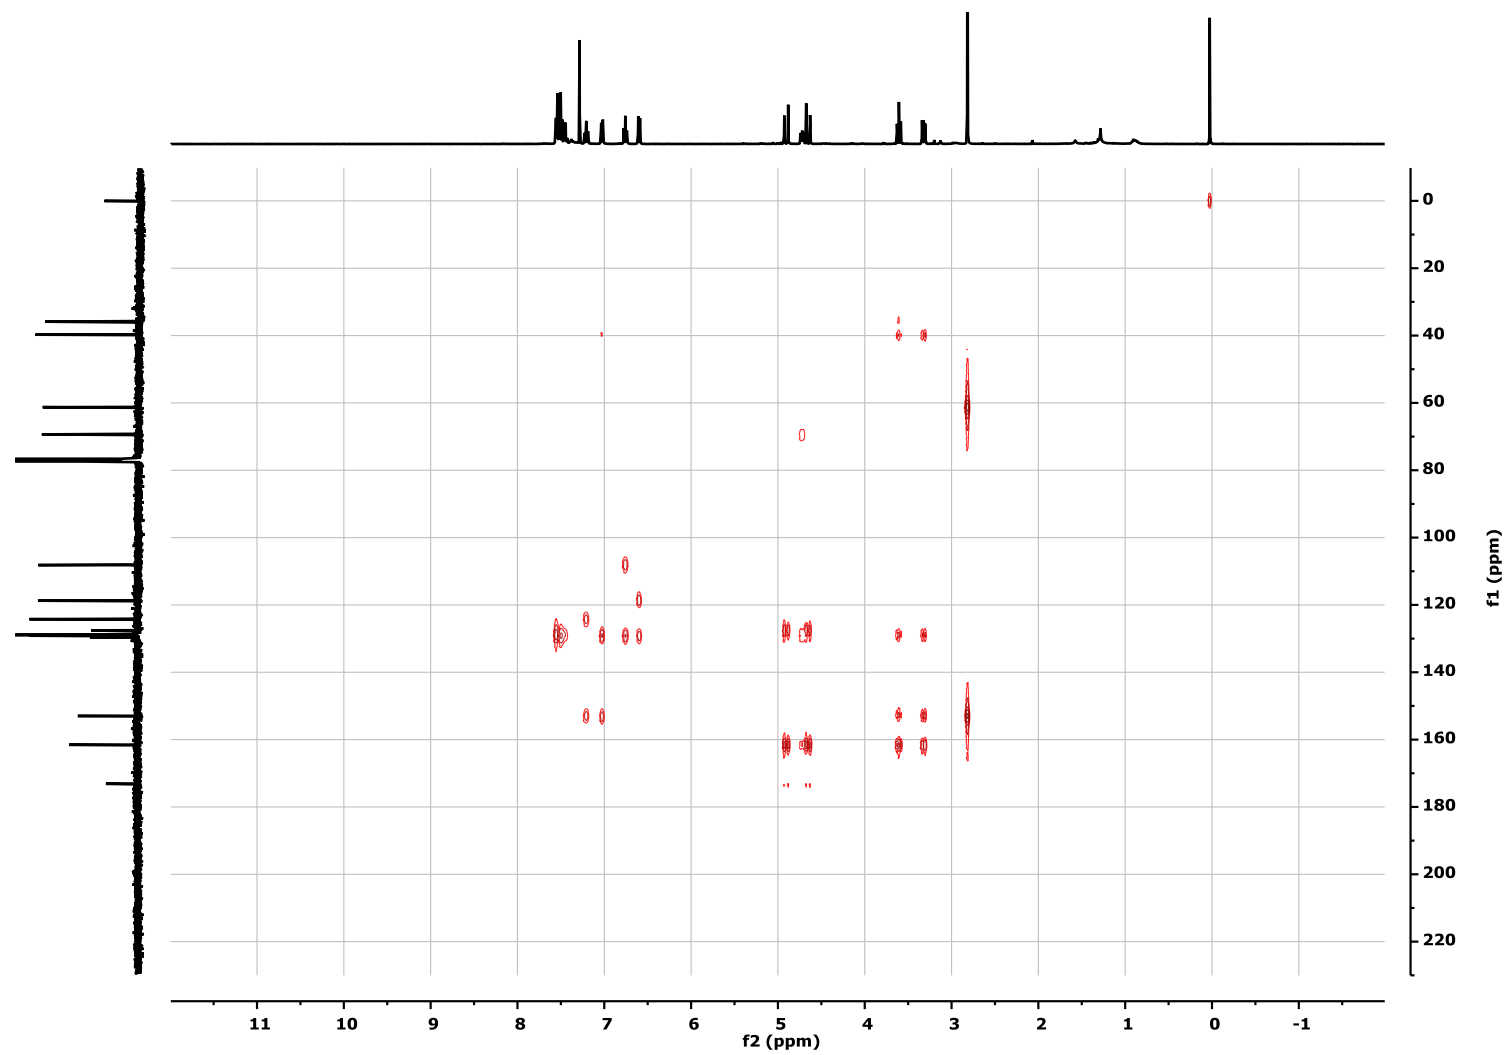

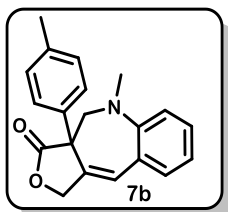

<sup>1</sup>H NMR (400 MHz, CDCl<sub>3</sub>)

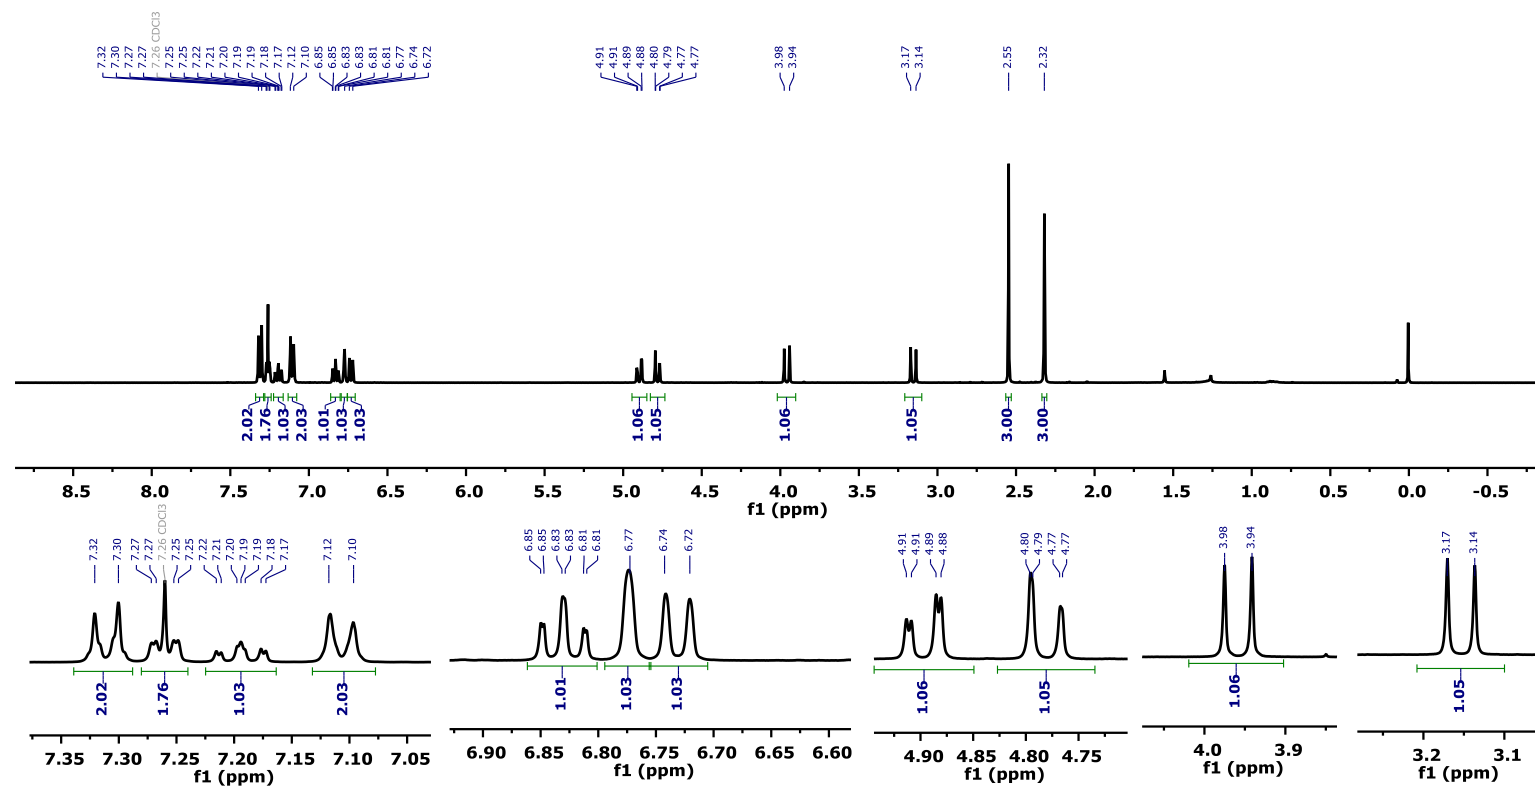

$^{13}\text{C}\{\text{H}\}$  NMR ( $\text{CDCl}_3$ , 101 MHz)

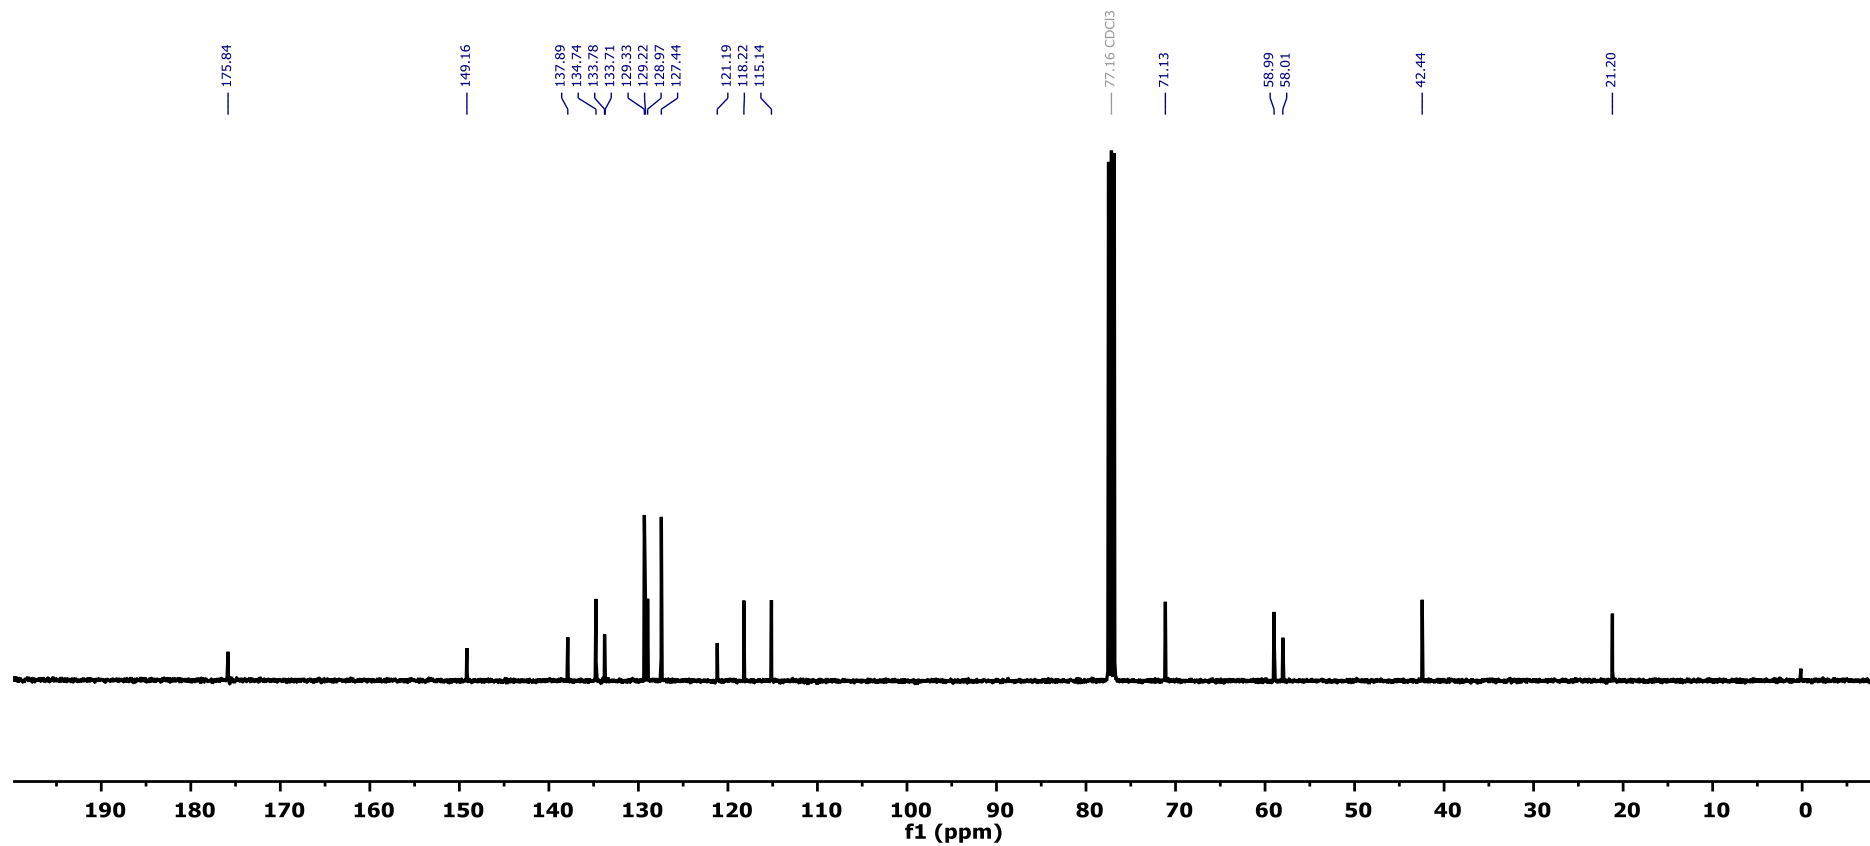

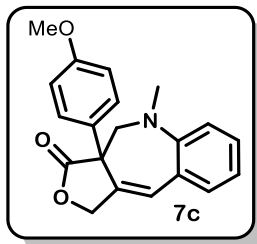

<sup>1</sup>H NMR (400 MHz, CDCl<sub>3</sub>)

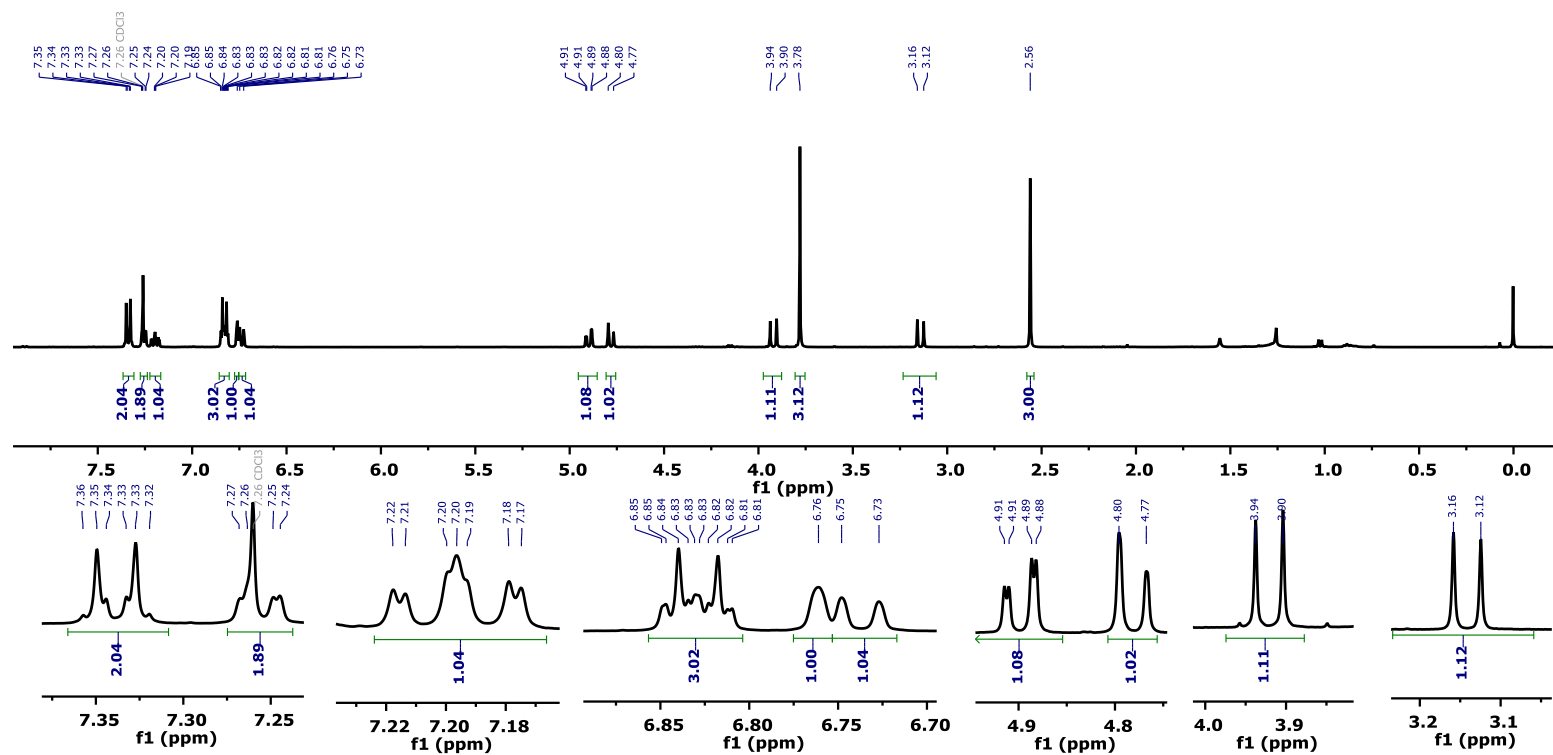

$^{13}\text{C}\{\text{H}\}$  NMR ( $\text{CDCl}_3$ , 101 MHz)

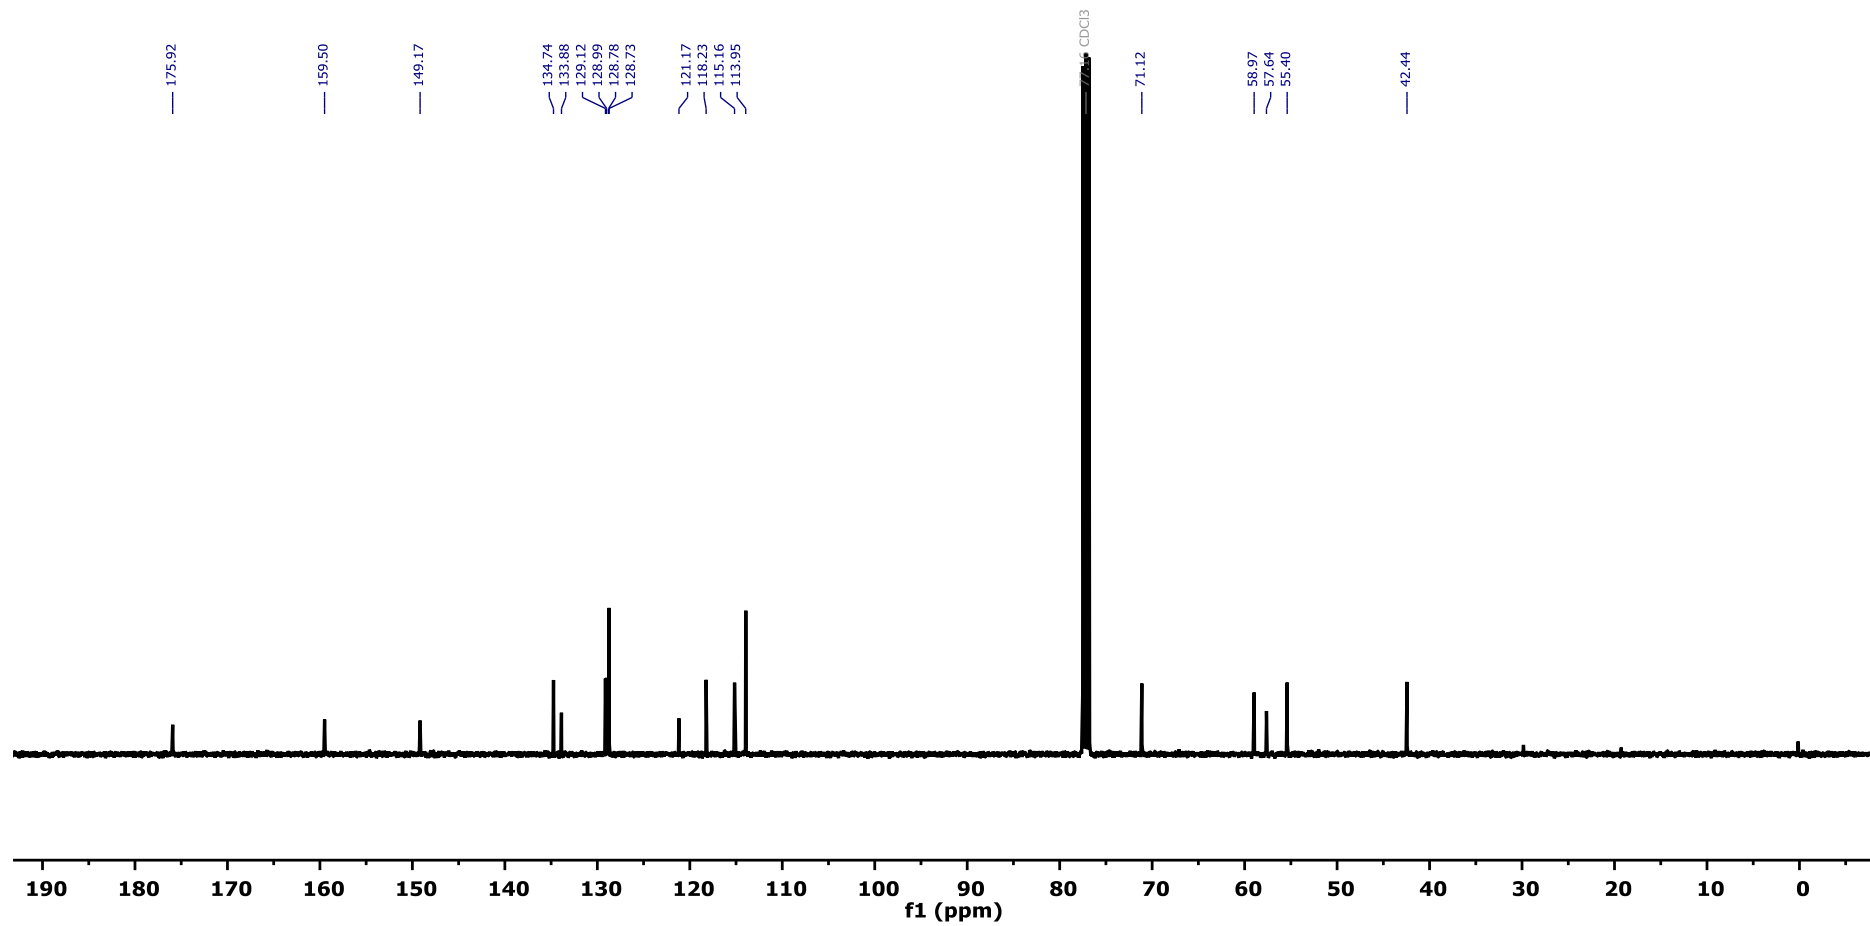



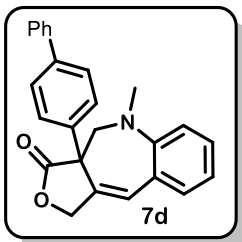

<sup>1</sup>H NMR (400 MHz, CDCl<sub>3</sub>)

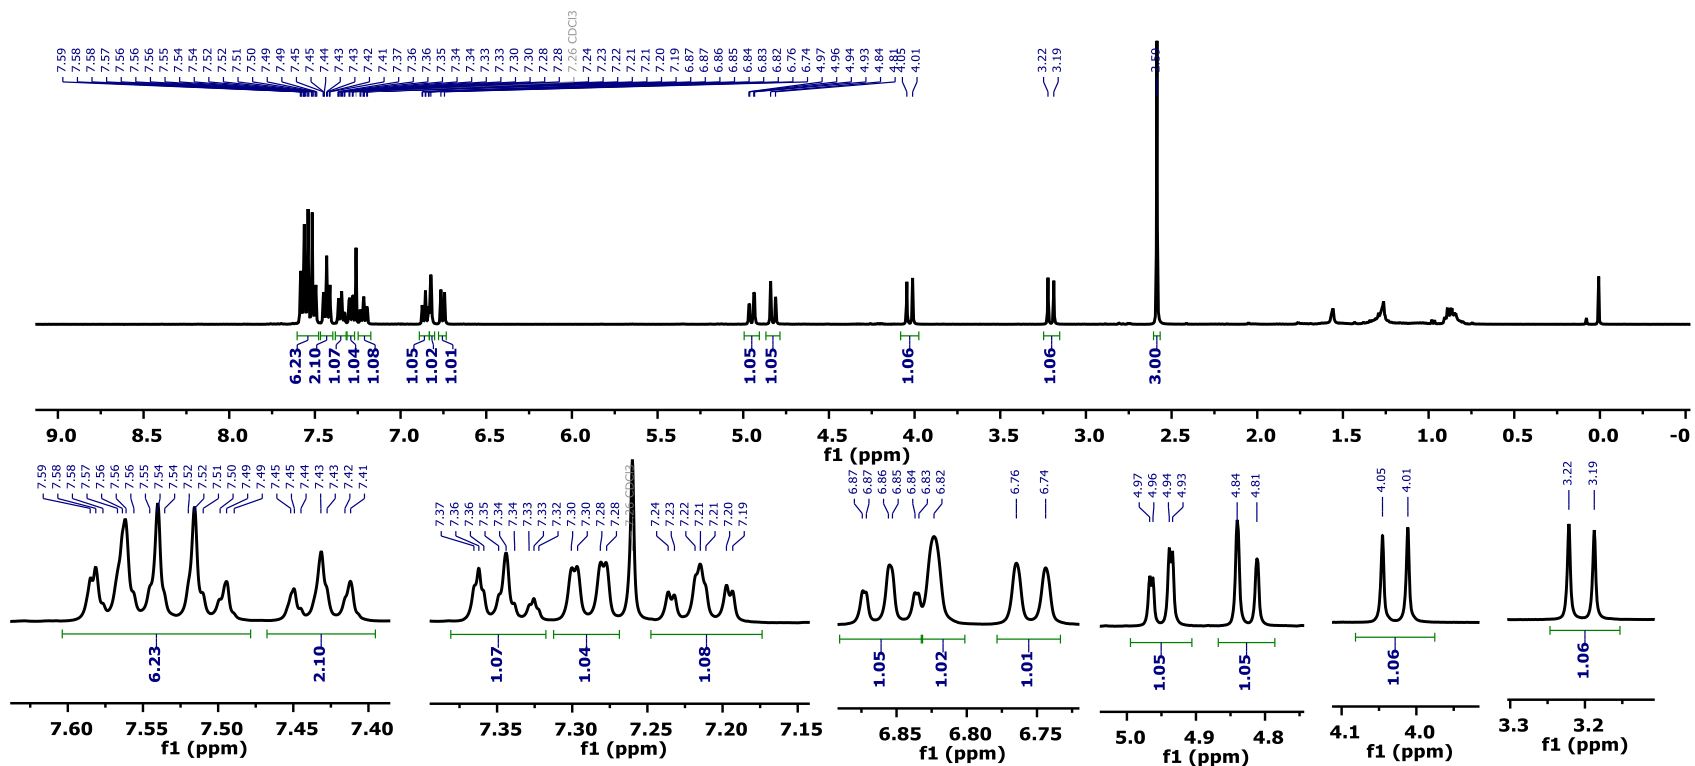

$^{13}\text{C}\{\text{H}\}$  NMR ( $\text{CDCl}_3$ , 101 MHz)

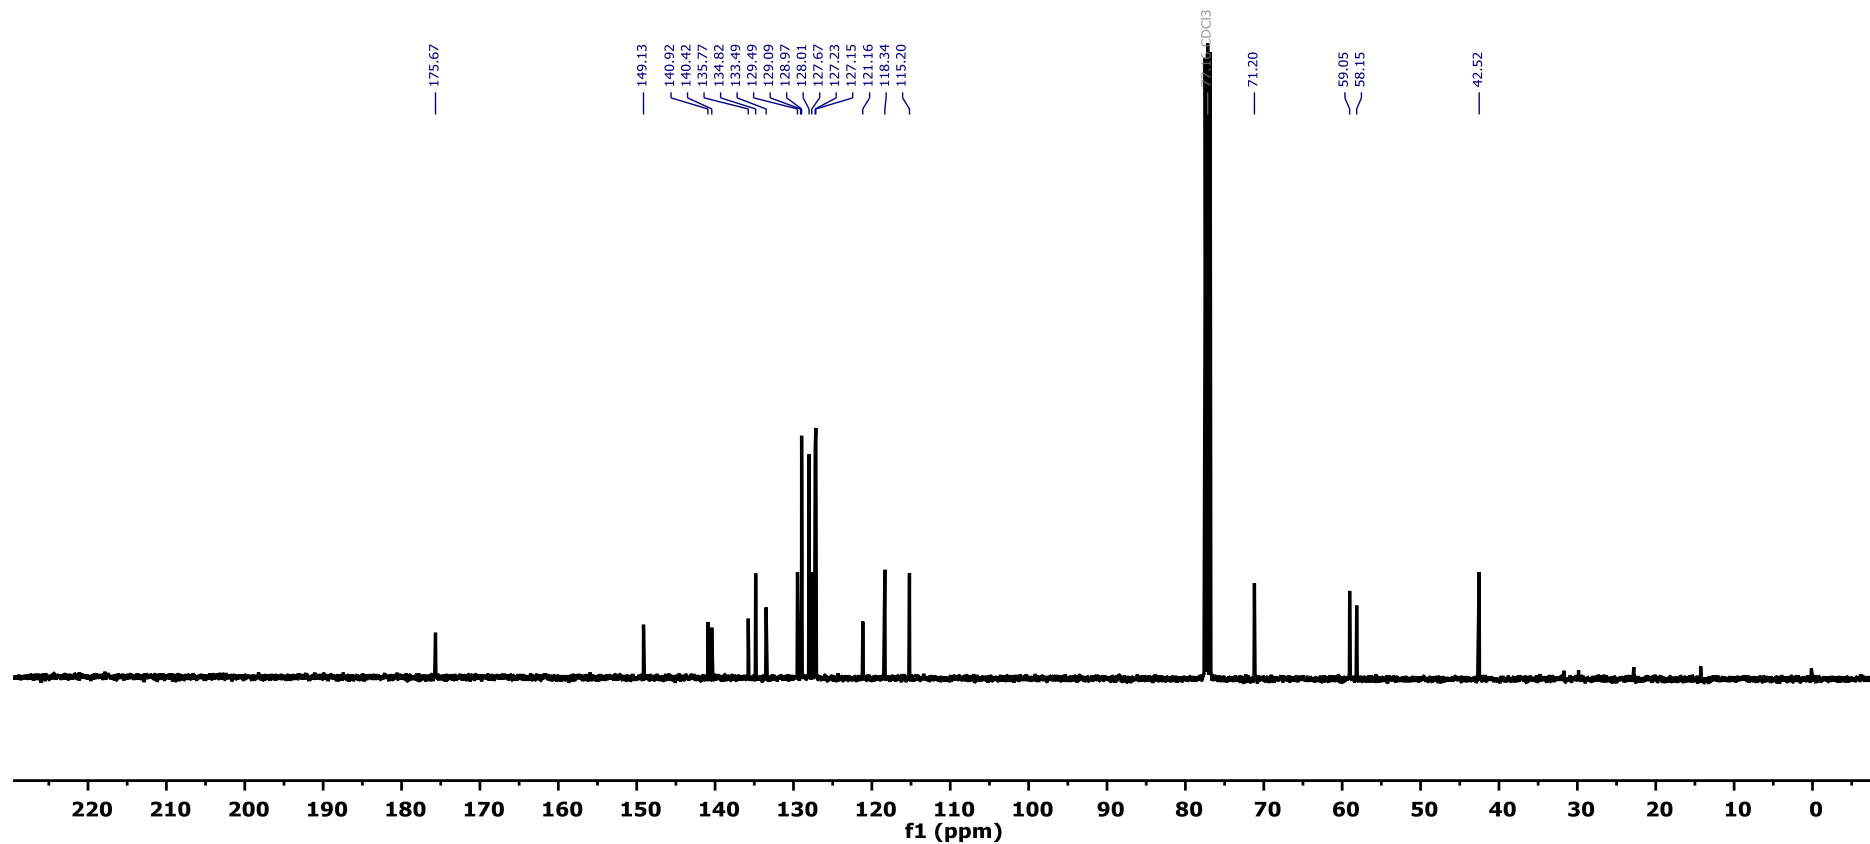

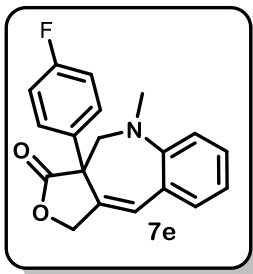

<sup>1</sup>H NMR (400 MHz, CDCl<sub>3</sub>)

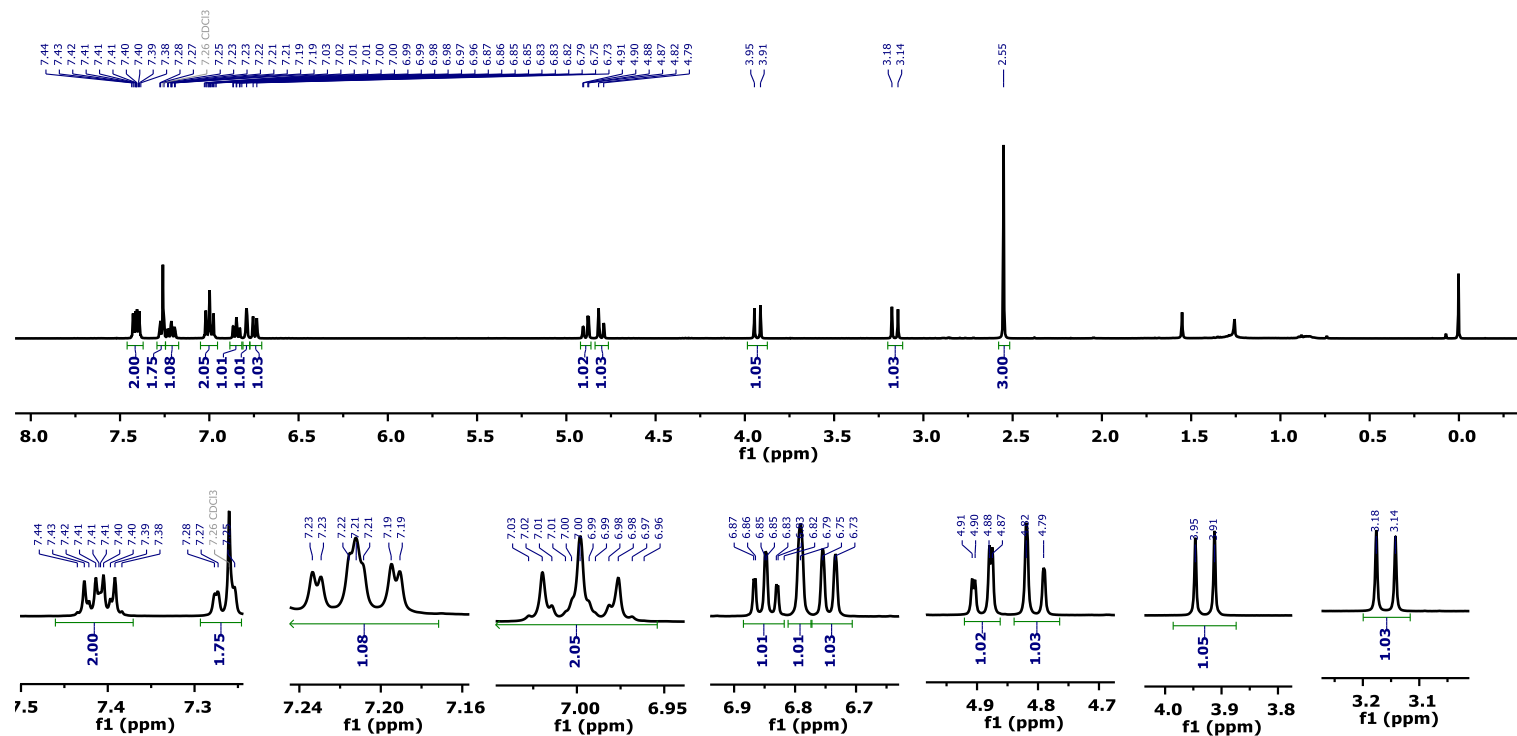

$^{13}\text{C}\{\text{H}\}$  NMR ( $\text{CDCl}_3$ , 101 MHz)

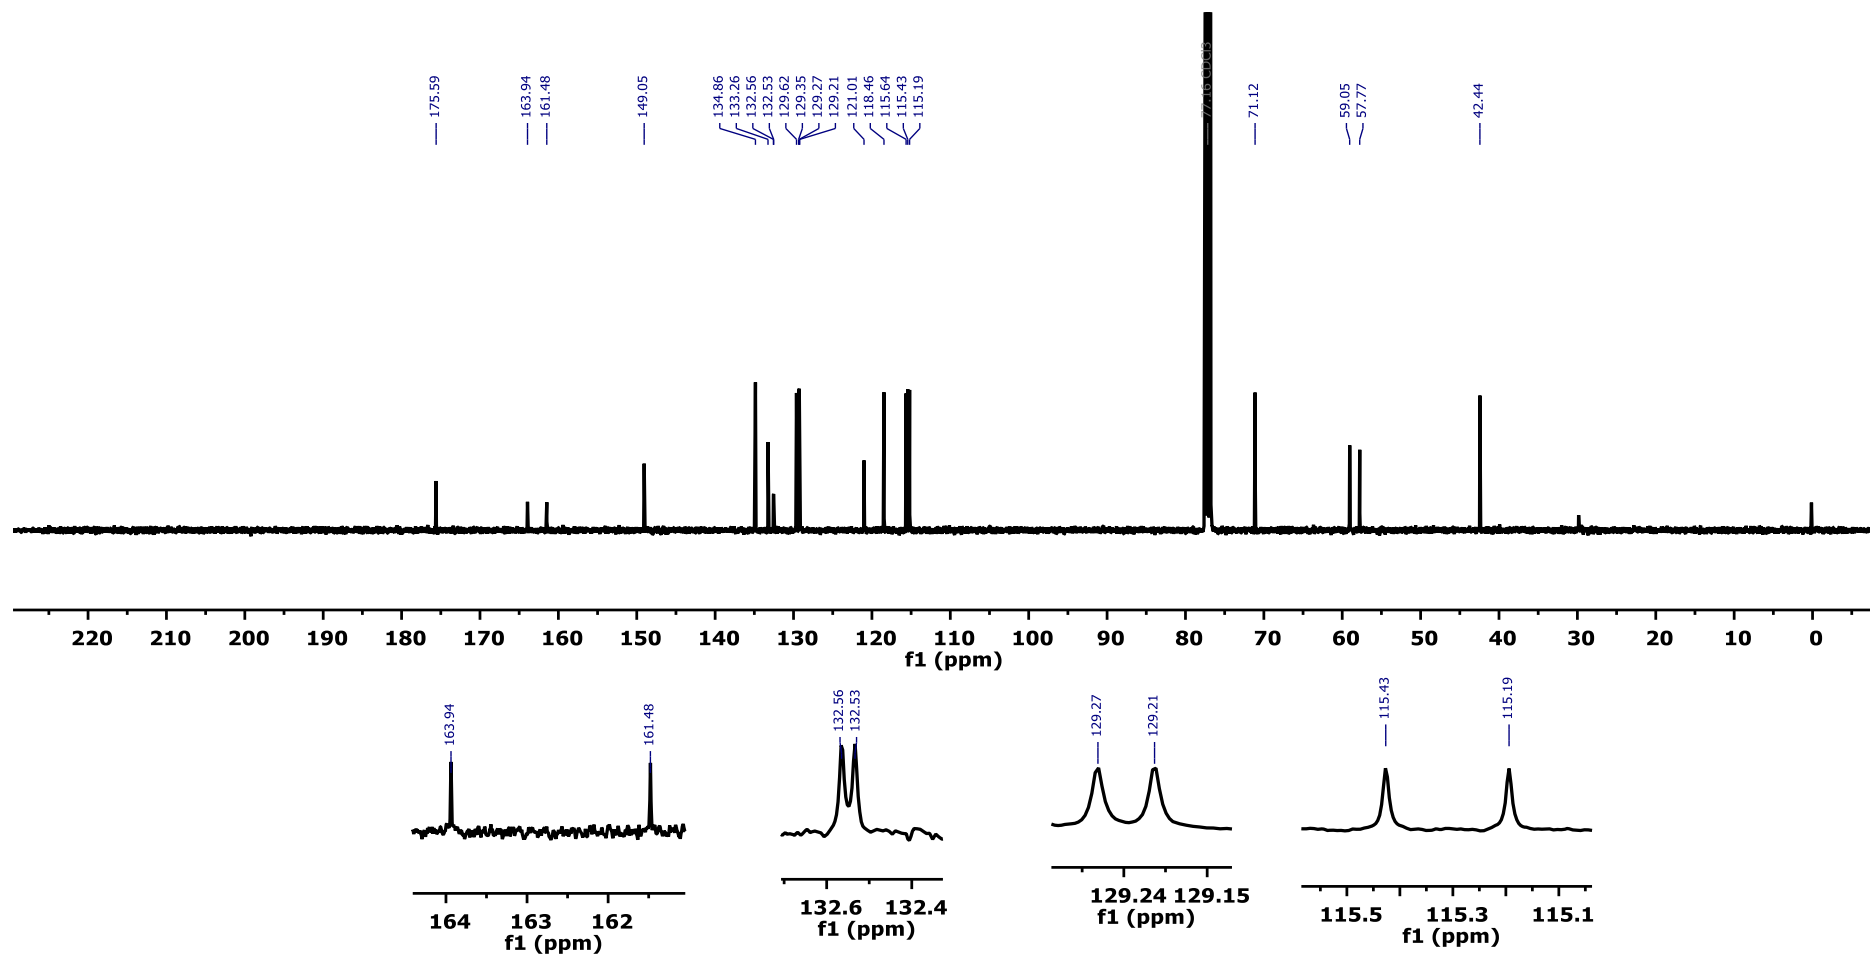

$^{19}\text{F}$  NMR ( $\text{CDCl}_3$ , 376 MHz):

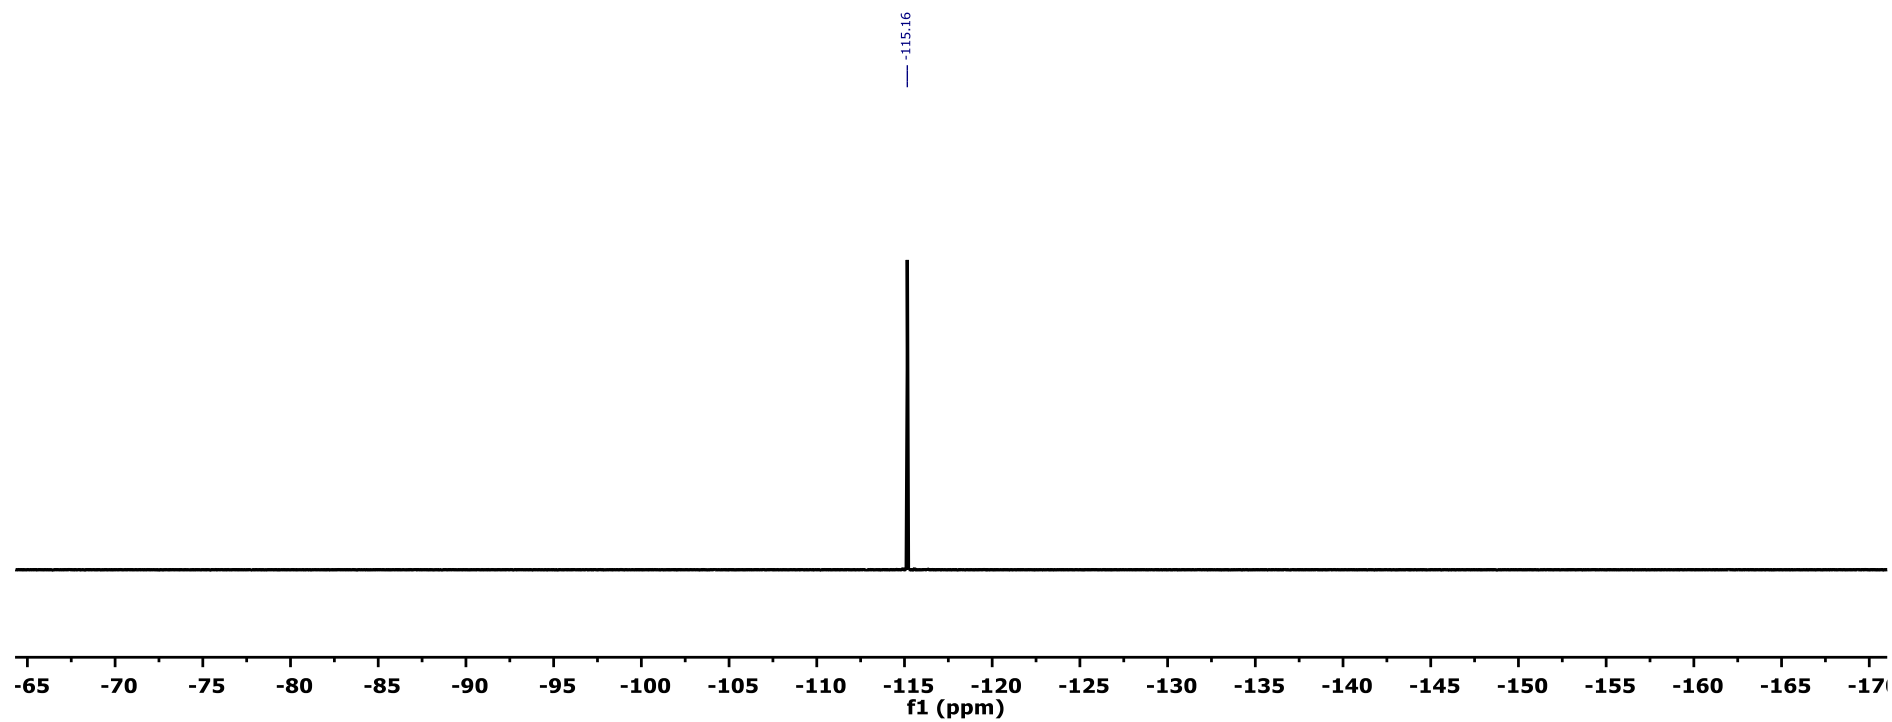

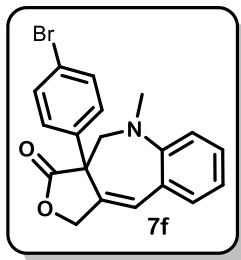

<sup>1</sup>H NMR (400 MHz, CDCl<sub>3</sub>)

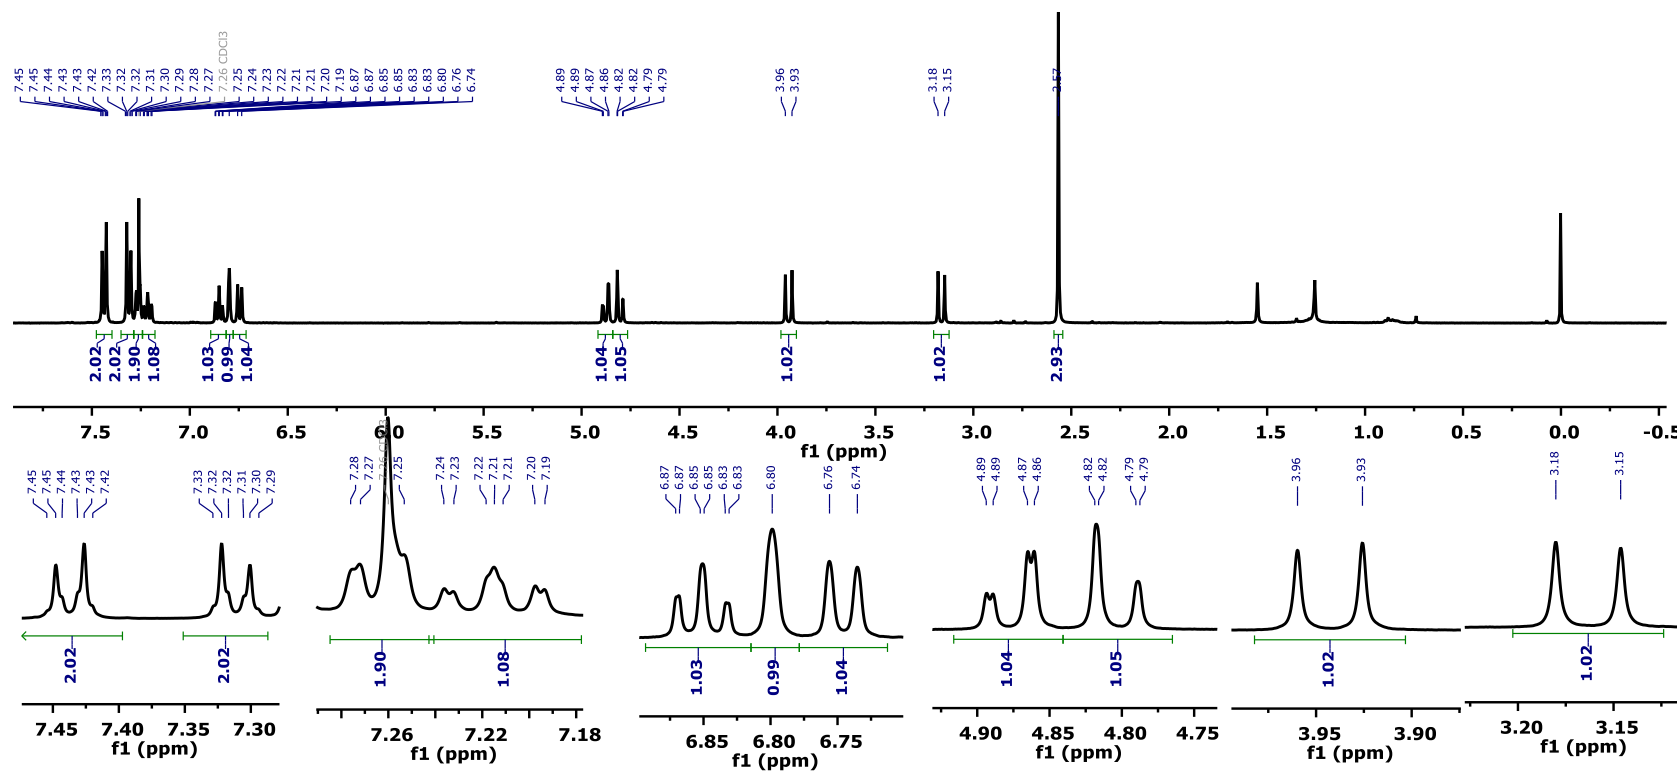

$^{13}\text{C}\{\text{H}\}$  NMR ( $\text{CDCl}_3$ , 101 MHz)

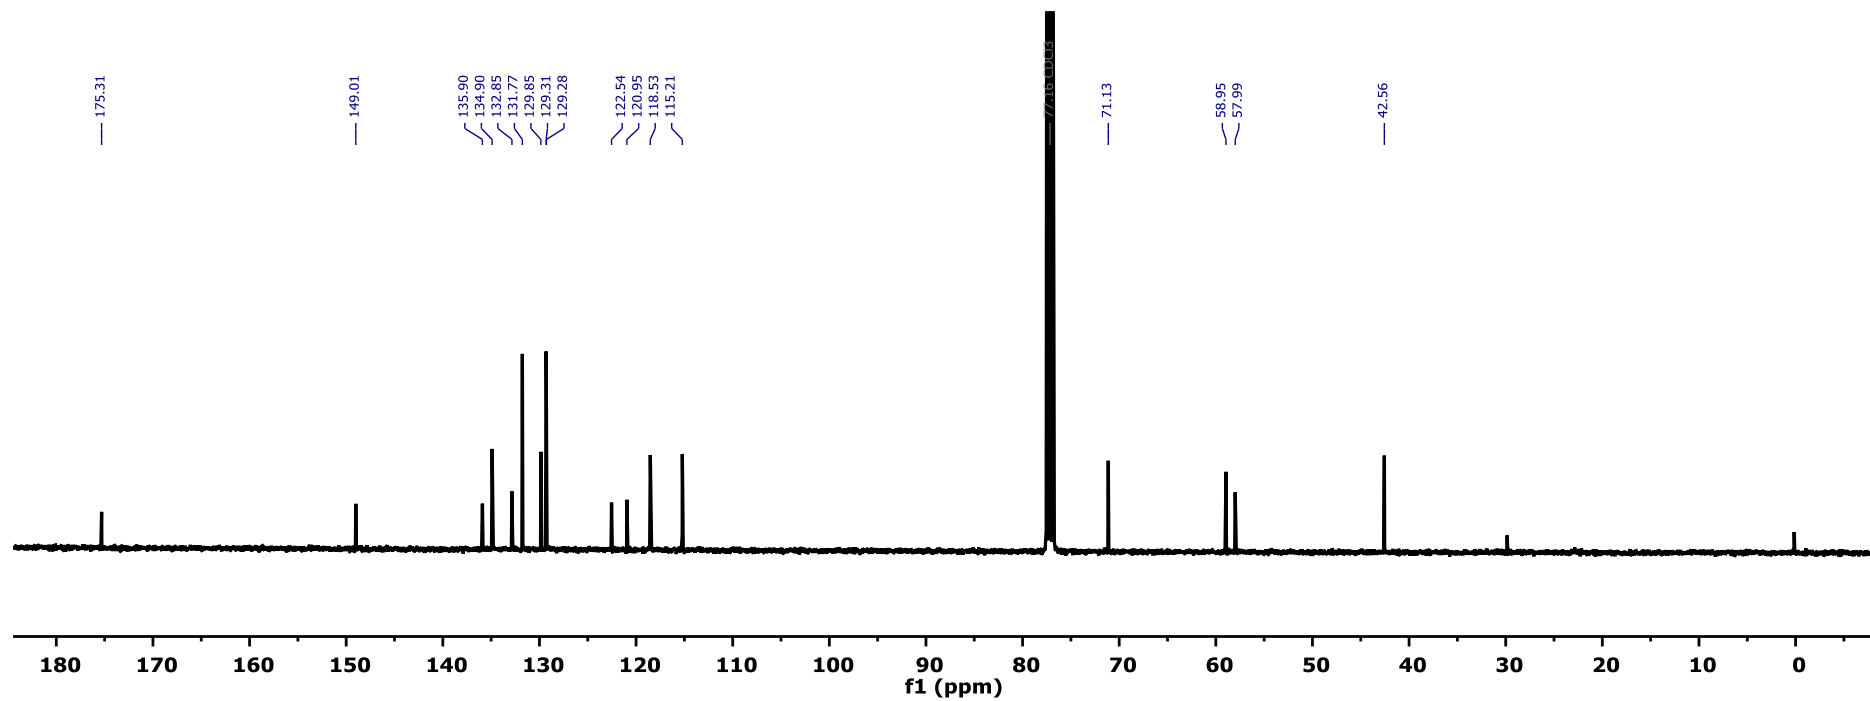

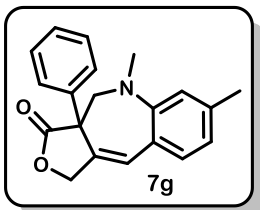

<sup>1</sup>H NMR (400 MHz, CDCl<sub>3</sub>)

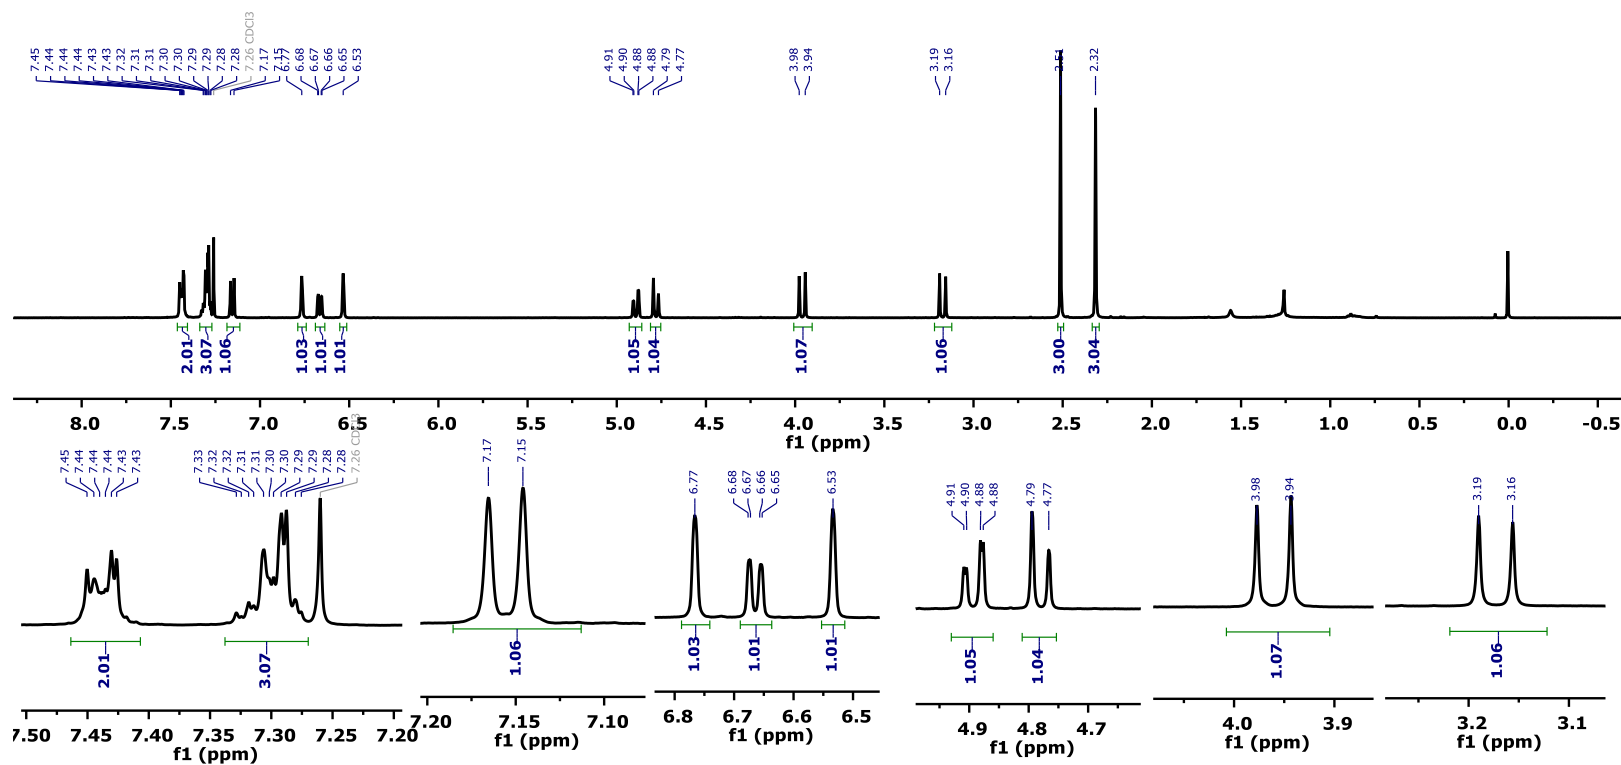



$^{13}\text{C}\{\text{H}\}$  NMR ( $\text{CDCl}_3$ , 101 MHz)

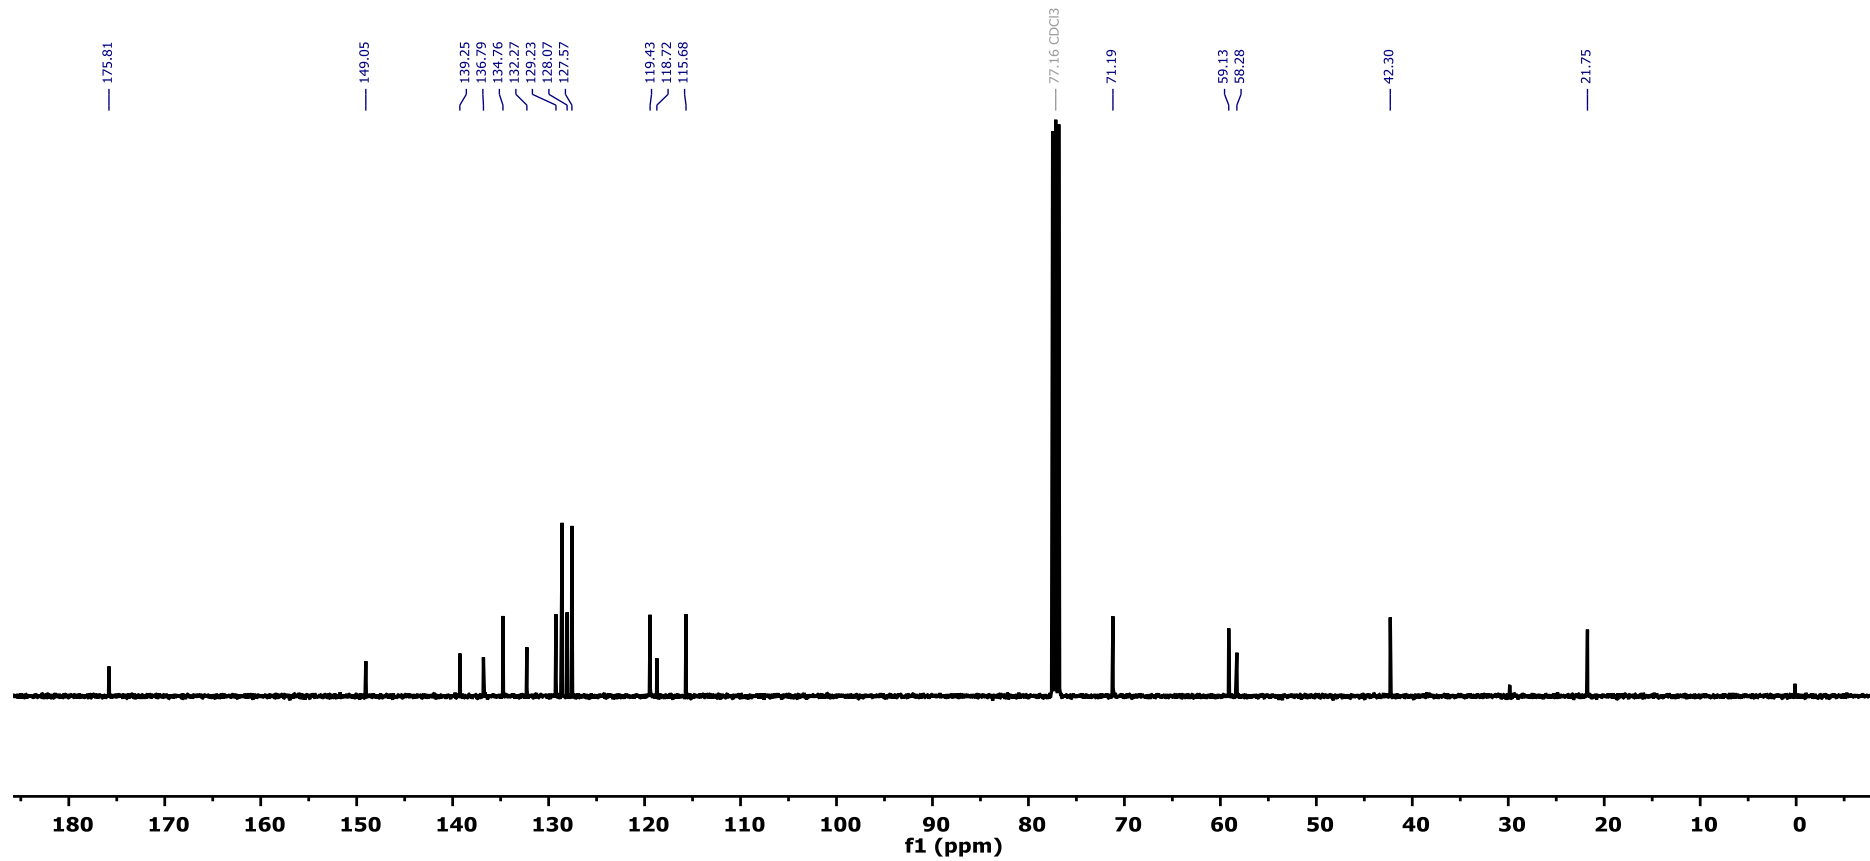

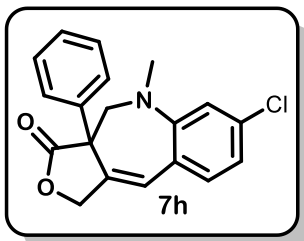

$^1\text{H}$  NMR (400 MHz,  $\text{CDCl}_3$ )

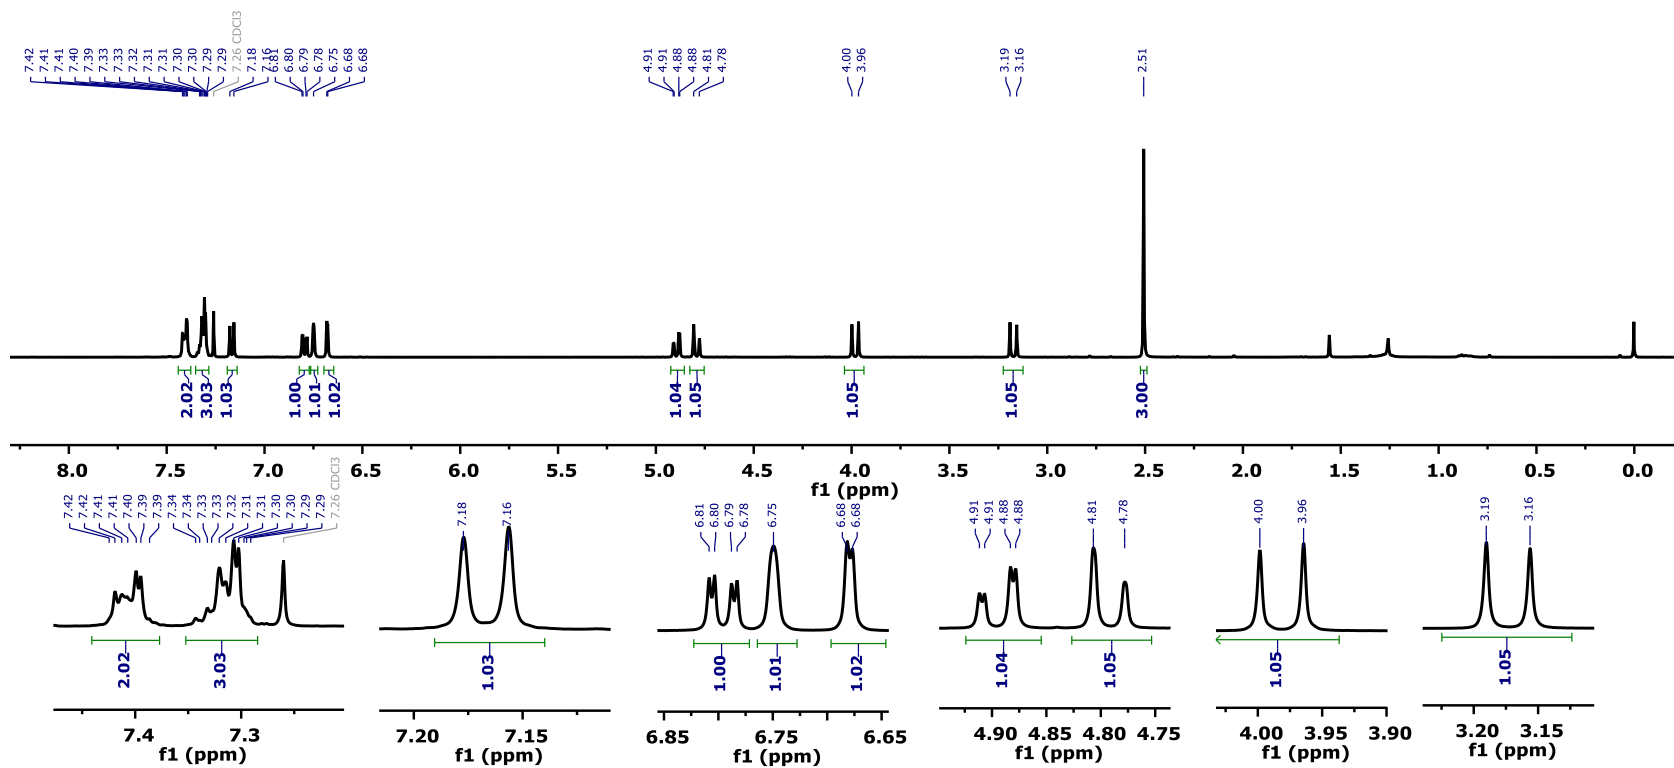

<sup>13</sup>C{H} NMR (CDCl<sub>3</sub>, 101 MHz)

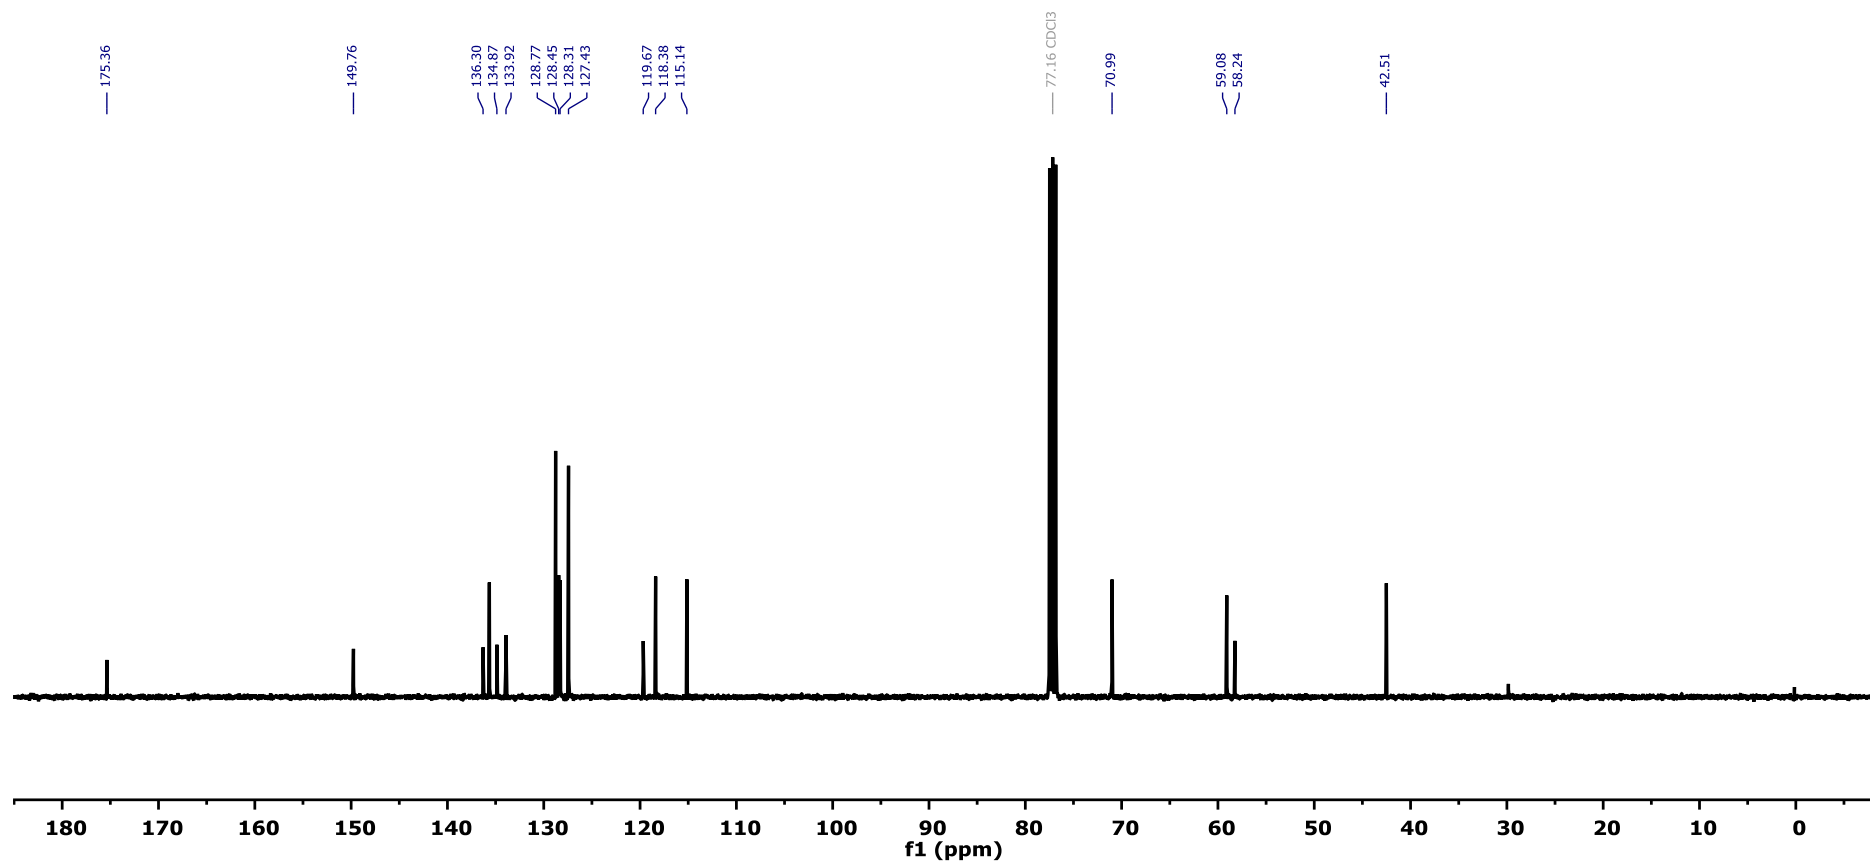

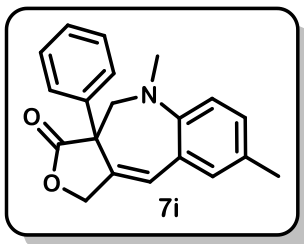

$^1\text{H NMR}$  (400 MHz,  $\text{CDCl}_3$ )

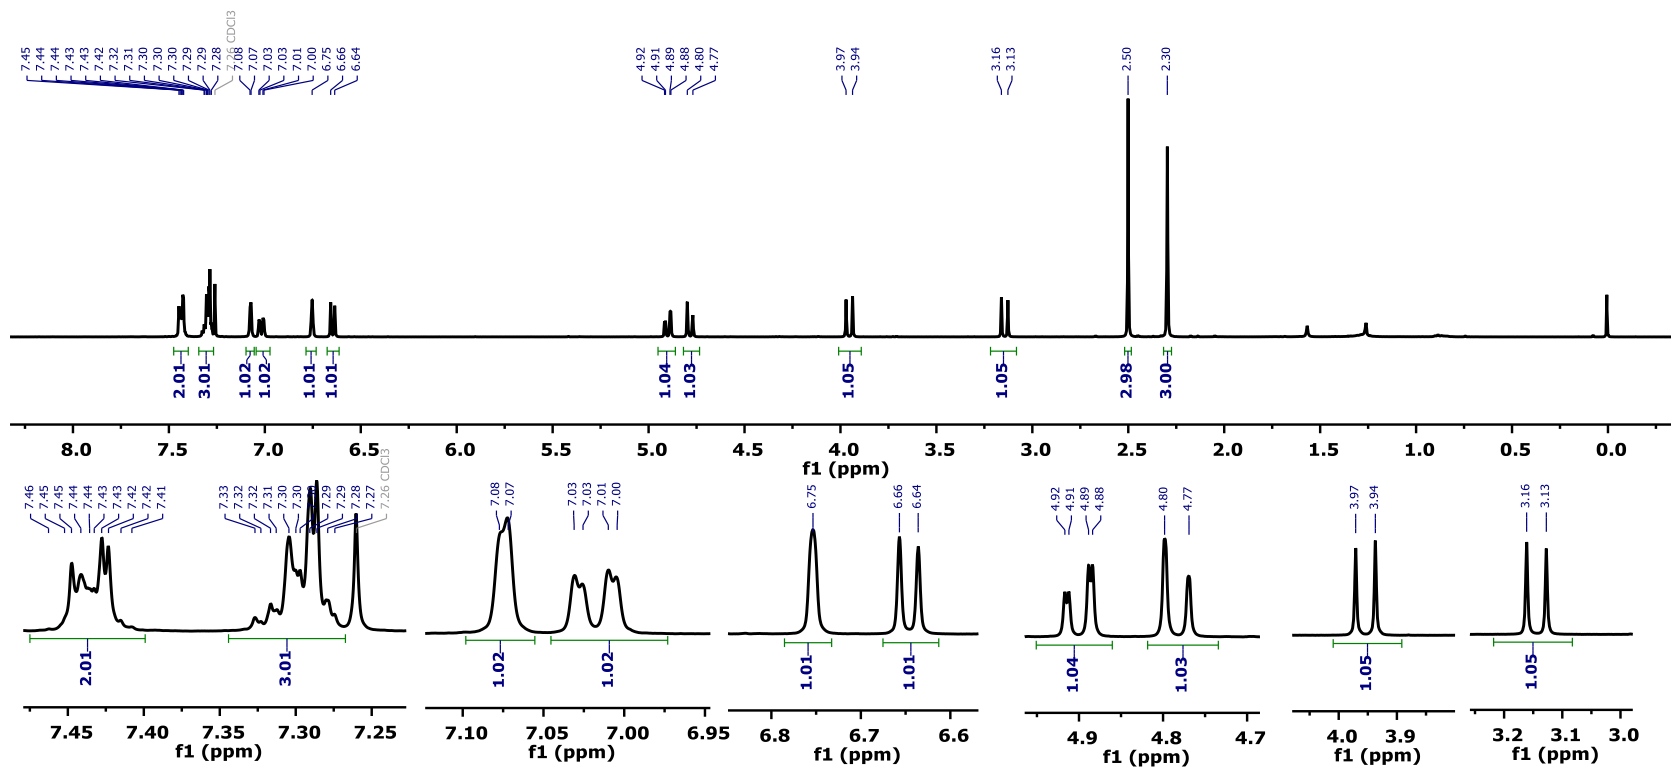

$^{13}\text{C}\{\text{H}\}$  NMR ( $\text{CDCl}_3$ , 101 MHz)

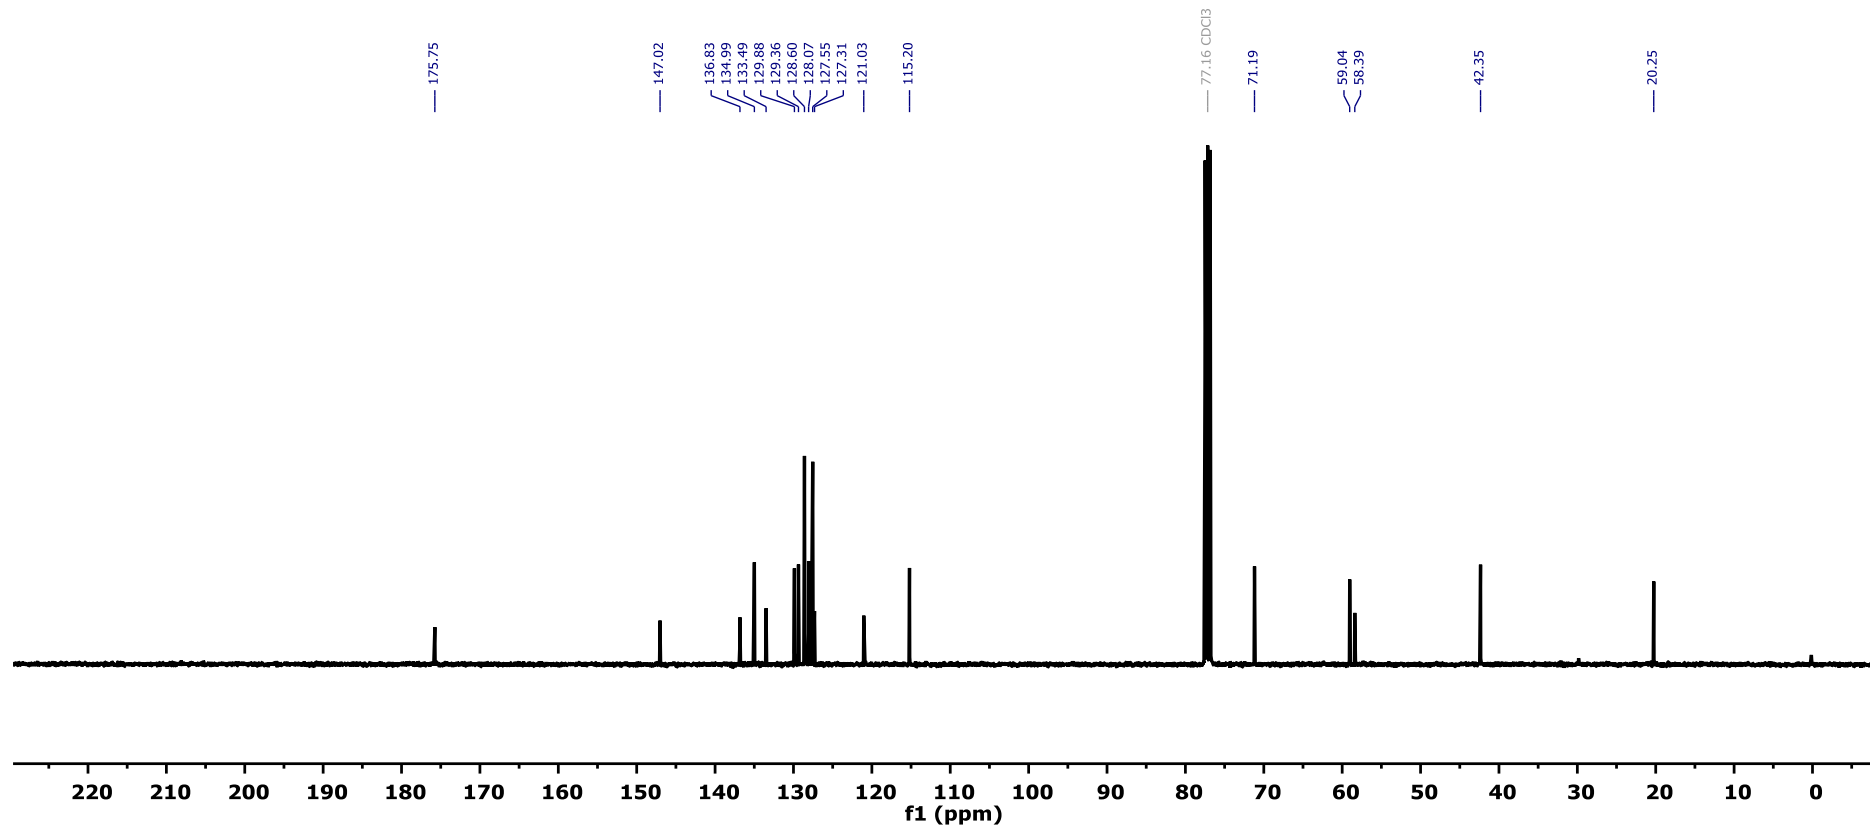

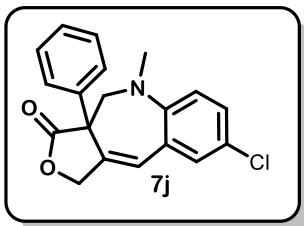

<sup>1</sup>H NMR (400 MHz, CDCl<sub>3</sub>)

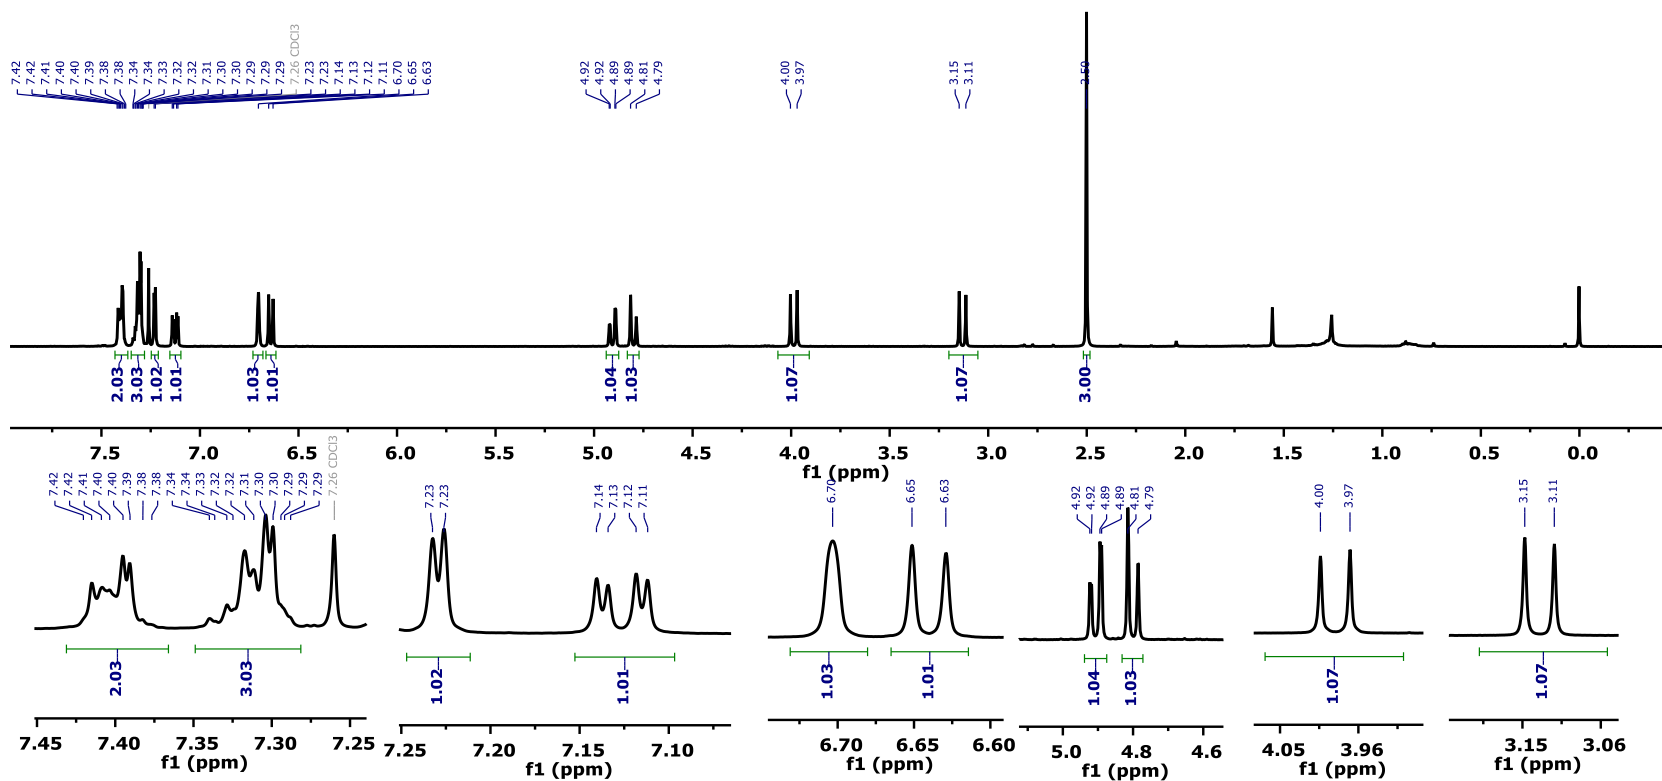

$^{13}\text{C}\{\text{H}\}$  NMR ( $\text{CDCl}_3$ , 101 MHz)

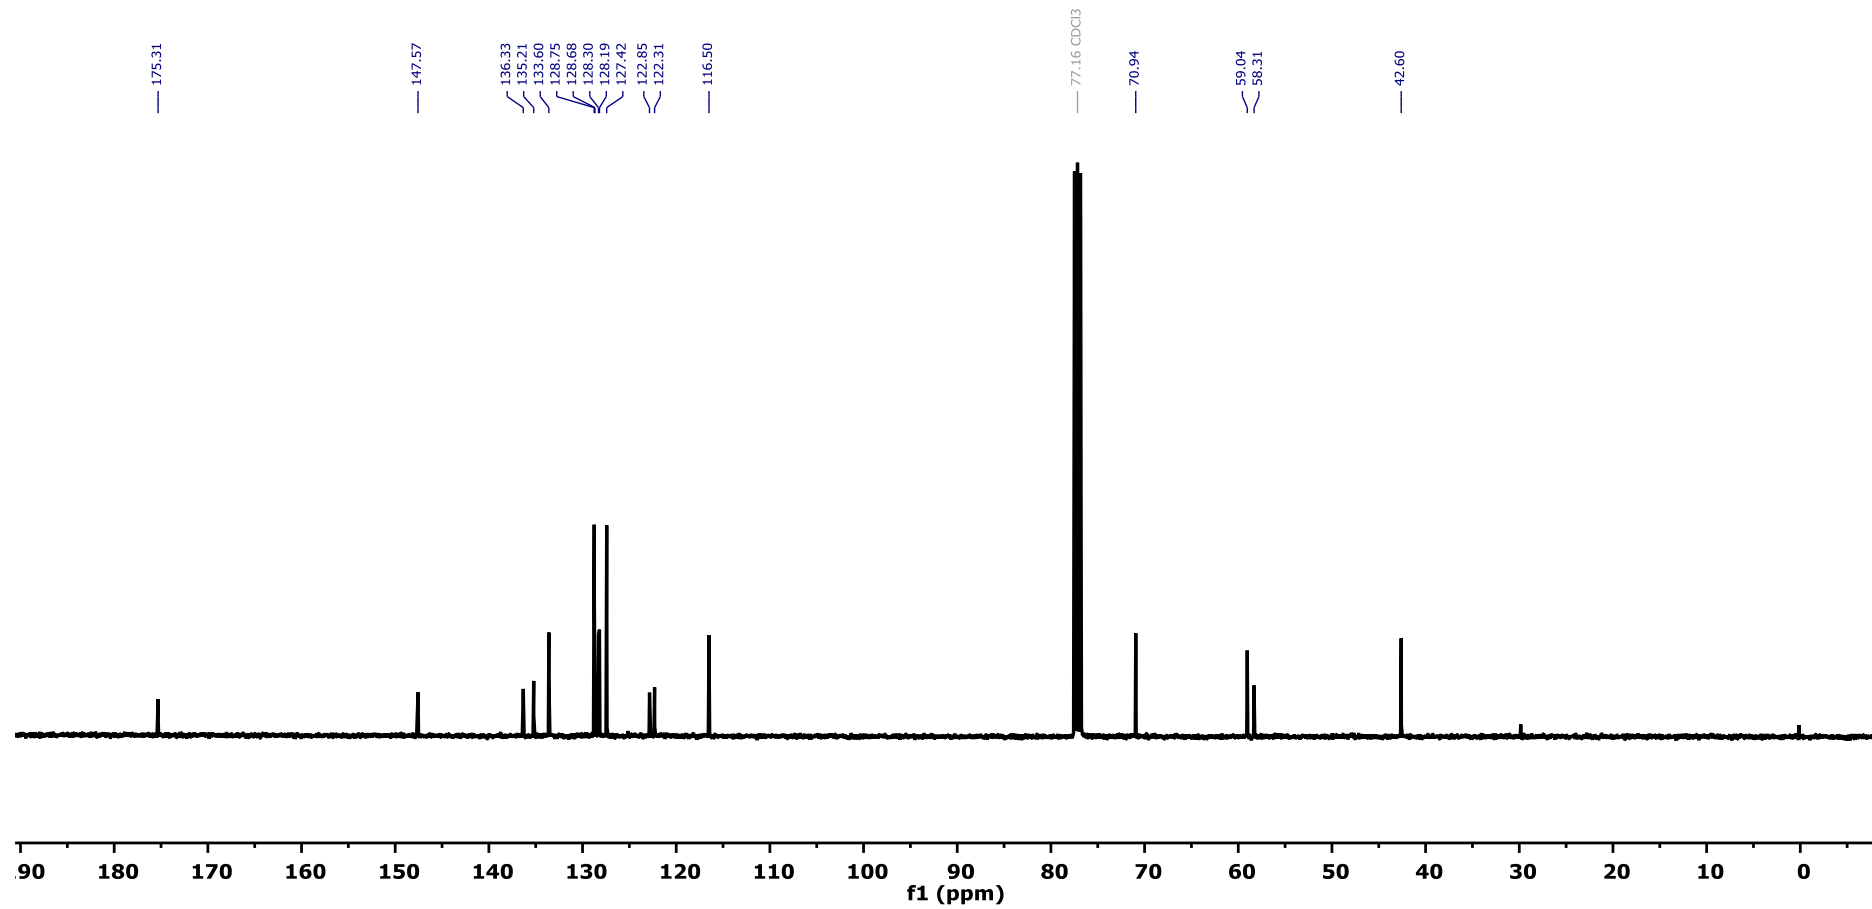

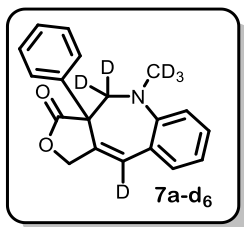

<sup>1</sup>H NMR (400 MHz, CDCl<sub>3</sub>)

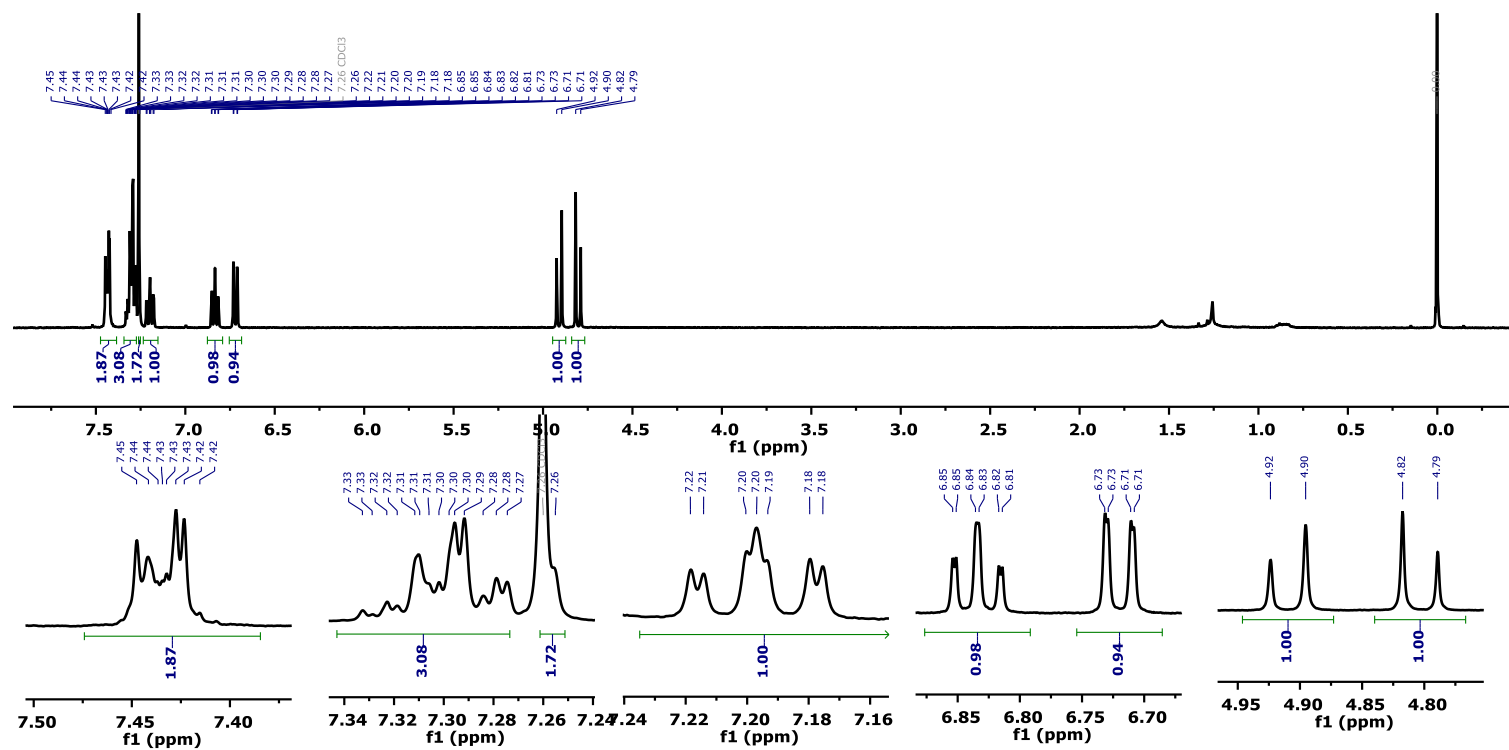



$^{13}\text{C}\{\text{H}\}$  NMR ( $\text{CDCl}_3$ , 101 MHz)

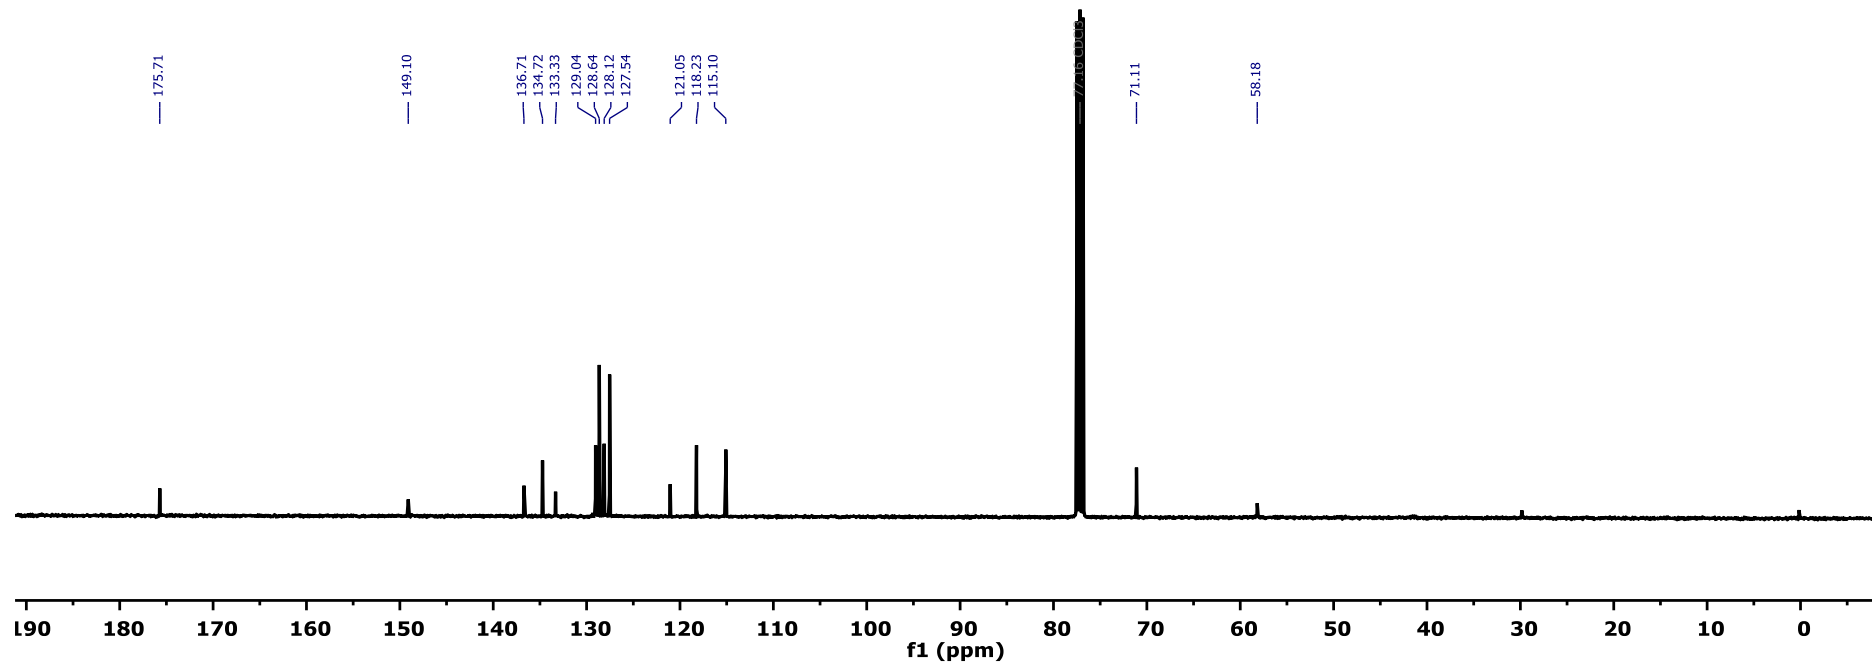

Supplement: ANIE-62-0-s001.pdf [file ANIE-62-0-s001.pdf]
